# Supplementary material for: Structure, evolution, and resilience of the pearl goods global trade network
Source: Research Square preprint supplement (doi:10.21203/rs.3.rs-7043164/v1), 2025-10-03
Supplement: Supplementary file 1 [file 6793f0831f813963de86e6bb.xlsx]

## Sheet: 2012
source	target	weight
Andorra	France	68.131
Andorra	Spain	535.936
Aruba	USA	1408
Australia	Canada	47413
Australia	China, Hong Kong SAR	6773584
Australia	Fiji	5004
Australia	France	4207
Australia	Germany	4828
Australia	India	5812
Australia	Indonesia	149865
Australia	Japan	9983
Australia	Malaysia	46030
Australia	Netherlands	7762
Australia	New Caledonia	61199
Australia	New Zealand	19186
Australia	New Zealand	965137
Australia	Other Asia, nes	9354
Australia	Papua New Guinea	62037
Australia	Philippines	6801
Australia	Portugal	14420
Australia	Qatar	183148
Australia	Rep. of Korea	505
Australia	Saudi Arabia	44500
Australia	Seychelles	35702
Australia	Singapore	682395
Australia	Singapore	32861
Australia	Switzerland	107005
Australia	Switzerland	272589
Australia	Thailand	694
Australia	Thailand	674107
Australia	United Arab Emirates	1948406
Australia	United Kingdom	2804071
Australia	United Kingdom	98205
Australia	United Rep. of Tanzania	2070
Australia	USA	86699
Australia	USA	275249
Australia	Viet Nam	25439
Austria	Algeria	36566
Austria	Argentina	45852
Austria	Australia	259669
Austria	Belgium	4223089
Austria	Belgium	53286
Austria	Brazil	27394
Austria	Bulgaria	28259
Austria	Bulgaria	463
Austria	Canada	9719
Austria	Chile	35949
Austria	China	19677
Austria	China, Hong Kong SAR	18628
Austria	Croatia	100764
Austria	Czechia	879885
Austria	Czechia	10642
Austria	Denmark	72329
Austria	Egypt	100600
Austria	Estonia	2907
Austria	France	1470909
Austria	Germany	138826977
Austria	Germany	294858
Austria	Greece	128620
Austria	Hungary	265472
Austria	Hungary	9462
Austria	India	1489
Austria	Indonesia	2144
Austria	Iran	127
Austria	Ireland	244731
Austria	Ireland	116
Austria	Israel	3322
Austria	Italy	4040288
Austria	Italy	5146
Austria	Japan	14774
Austria	Kuwait	4148
Austria	Latvia	1292
Austria	Lebanon	2111
Austria	Lithuania	1449
Austria	Luxembourg	21214
Austria	Luxembourg	16742
Austria	Madagascar	15351
Austria	Malta	119061
Austria	Mauritius	75192
Austria	Mexico	21744
Austria	Morocco	1937
Austria	Netherlands	515737
Austria	Netherlands	53981
Austria	Norway	491215
Austria	Poland	54814
Austria	Portugal	82895
Austria	Portugal	2599
Austria	Rep. of Korea	1046
Austria	Romania	3912
Austria	Romania	25588
Austria	Russian Federation	174
Austria	Russian Federation	1076
Austria	Serbia	555
Austria	Singapore	5690
Austria	Slovakia	667328
Austria	Slovakia	16319
Austria	Slovenia	947720
Austria	Slovenia	21600
Austria	South Africa	149787
Austria	Spain	57089
Austria	Spain	1387
Austria	Sweden	1339374
Austria	Switzerland	159198
Austria	Switzerland	69508
Austria	Syria	5627
Austria	Thailand	773
Austria	Tunisia	20639
Austria	Türkiye	1145634
Austria	United Kingdom	7798754
Austria	United Kingdom	33719
Austria	USA	3390637
Austria	USA	368
Bahamas	USA	260127
Barbados	USA	327018
Belgium	Angola	1750.48
Belgium	Austria	127.409
Belgium	Austria	119.269
Belgium	Benin	11238
Belgium	Brazil	1.45544e+07
Belgium	Canada	21192.3
Belgium	Cayman Isds	53677.5
Belgium	China	1.34624e+07
Belgium	Cuba	53176.5
Belgium	Czechia	62149.2
Belgium	France	5.27179e+06
Belgium	France	3.009
Belgium	Germany	6.37979e+08
Belgium	Germany	584.565
Belgium	Greece	11.175
Belgium	Guinea	18431.8
Belgium	Hungary	238592
Belgium	India	75.766
Belgium	India	20075.1
Belgium	Iran	33645.3
Belgium	Ireland	147606
Belgium	Israel	18023.6
Belgium	Italy	4.12415e+06
Belgium	Japan	7865.36
Belgium	Kenya	10045.2
Belgium	Lithuania	23978.5
Belgium	Luxembourg	1422.72
Belgium	Malaysia	1497.49
Belgium	Morocco	4844.05
Belgium	Netherlands	1.43434e+06
Belgium	Netherlands	51.694
Belgium	Other Asia, nes	621.869
Belgium	Portugal	48528.6
Belgium	Rep. of Korea	947.039
Belgium	Russian Federation	646341
Belgium	Saudi Arabia	192.887
Belgium	Singapore	2.89412e+06
Belgium	Slovakia	4.68074e+06
Belgium	Slovenia	2829.71
Belgium	Spain	5926.45
Belgium	Sweden	12751.6
Belgium	Sweden	0.051
Belgium	Switzerland	2.00465e+06
Belgium	Switzerland	1487.98
Belgium	Türkiye	3.588
Belgium	Türkiye	696.594
Belgium	Uganda	16208.1
Belgium	United Arab Emirates	197.015
Belgium	United Kingdom	2.15538e+08
Belgium	United Kingdom	0.694
Belgium	USA	1.62579e+08
Belgium	USA	1839.59
Brazil	Angola	240
Brazil	Belgium	405633
Brazil	Chile	4602
Brazil	Germany	49817
Brazil	Panama	75
Brazil	Peru	563
Brazil	South Africa	11588
Brazil	United Kingdom	990
Brazil	Uruguay	2972
Brazil	USA	18095596
Brunei Darussalam	Singapore	1
Bulgaria	Germany	81823
Bulgaria	Italy	84995
Bulgaria	Russian Federation	261
Bulgaria	Türkiye	18990
Bulgaria	United Kingdom	395824
Canada	Australia	10869
Canada	Australia	1453
Canada	Bahamas	222
Canada	China	8
Canada	China, Hong Kong SAR	55615
Canada	Czechia	9487
Canada	Finland	2830
Canada	France	52142
Canada	Germany	7175099
Canada	India	1957
Canada	Mexico	509399
Canada	Netherlands	11171
Canada	Pakistan	15024
Canada	Peru	850
Canada	Singapore	2125
Canada	South Africa	3320
Canada	Switzerland	20762738
Canada	Trinidad and Tobago	190
Canada	Türkiye	403
Canada	United Kingdom	77999698
Canada	USA	106232851
Canada	USA	1026954
Canada	Venezuela	1563
Chile	China	436203
Chile	India	43223.7
Chile	USA	27000
China	Algeria	510
China	Antigua and Barbuda	1321
China	Australia	644626
China	Austria	34813
China	Belgium	98182
China	Brazil	11812
China	Bulgaria	40421
China	Canada	413697
China	China, Hong Kong SAR	666415
China	China, Hong Kong SAR	15975829
China	Colombia	203
China	Croatia	2190
China	Cyprus	40841
China	Czechia	33933
China	Denmark	105593
China	Estonia	361
China	Finland	16284
China	France	22977
China	France	152344
China	Germany	2360329
China	Germany	1002395
China	Greece	468
China	Guatemala	7980
China	Honduras	9403
China	Hungary	10363
China	India	5884
China	India	159139
China	Iran	59630
China	Iran	89449
China	Iraq	8632
China	Ireland	3295
China	Israel	13908
China	Italy	138663
China	Japan	31481810
China	Japan	1785802
China	Latvia	4395
China	Lebanon	1200
China	Lithuania	1800
China	Malaysia	86775
China	Mexico	134594
China	Netherlands	53530
China	New Zealand	20447
China	Other Asia, nes	51075
China	Peru	20640
China	Poland	26174
China	Portugal	5368
China	Rep. of Korea	11417
China	Romania	7386
China	Russian Federation	2901464
China	San Marino	525
China	Serbia	540
China	Singapore	601
China	Slovenia	1454
China	South Africa	95
China	Spain	219938
China	Sri Lanka	14571
China	Sweden	66714
China	Switzerland	6456924
China	Thailand	19013
China	Türkiye	16619
China	United Arab Emirates	6639
China	United Kingdom	779795
China	United Kingdom	789298
China	Uruguay	5281
China	USA	31675719
China	USA	6861614
China	Viet Nam	22178683
China, Hong Kong SAR	Australia	4942232
China, Hong Kong SAR	Australia	1059354
China, Hong Kong SAR	Austria	253317
China, Hong Kong SAR	Belgium	16931
China, Hong Kong SAR	Brazil	6200
China, Hong Kong SAR	Brunei Darussalam	675
China, Hong Kong SAR	Canada	138416
China, Hong Kong SAR	Chile	55395
China, Hong Kong SAR	China	700812931
China, Hong Kong SAR	China	1817868
China, Hong Kong SAR	China, Macao SAR	113740
China, Hong Kong SAR	Czechia	6738
China, Hong Kong SAR	Denmark	39732
China, Hong Kong SAR	Estonia	34743
China, Hong Kong SAR	Fiji	177284
China, Hong Kong SAR	Finland	23039
China, Hong Kong SAR	France	2374561
China, Hong Kong SAR	Germany	782123
China, Hong Kong SAR	Germany	1262171
China, Hong Kong SAR	Gibraltar	2786
China, Hong Kong SAR	Greece	17050
China, Hong Kong SAR	Hungary	35124
China, Hong Kong SAR	India	667650
China, Hong Kong SAR	India	125577
China, Hong Kong SAR	Indonesia	350715
China, Hong Kong SAR	Ireland	60263
China, Hong Kong SAR	Israel	14797
China, Hong Kong SAR	Italy	142412
China, Hong Kong SAR	Japan	13805748
China, Hong Kong SAR	Japan	526123
China, Hong Kong SAR	LAIA, nes	4017
China, Hong Kong SAR	Luxembourg	51464
China, Hong Kong SAR	Malaysia	236526
China, Hong Kong SAR	Mexico	58174
China, Hong Kong SAR	Netherlands	979193
China, Hong Kong SAR	Netherlands	287747
China, Hong Kong SAR	New Zealand	93503
China, Hong Kong SAR	Norway	39058
China, Hong Kong SAR	Oceania, nes	1718
China, Hong Kong SAR	Oman	2144
China, Hong Kong SAR	Other Asia, nes	15682414
China, Hong Kong SAR	Other Asia, nes	3163503
China, Hong Kong SAR	Panama	13073
China, Hong Kong SAR	Philippines	60829
China, Hong Kong SAR	Poland	453379
China, Hong Kong SAR	Portugal	82814
China, Hong Kong SAR	Qatar	146501
China, Hong Kong SAR	Rep. of Korea	46761
China, Hong Kong SAR	Romania	12246
China, Hong Kong SAR	Russian Federation	352293
China, Hong Kong SAR	Saudi Arabia	5336
China, Hong Kong SAR	Singapore	165263
China, Hong Kong SAR	Singapore	844338
China, Hong Kong SAR	South Africa	29538
China, Hong Kong SAR	Spain	226013
China, Hong Kong SAR	Sri Lanka	319400
China, Hong Kong SAR	Sweden	215411
China, Hong Kong SAR	Switzerland	73698
China, Hong Kong SAR	Switzerland	2301367
China, Hong Kong SAR	Thailand	2634502
China, Hong Kong SAR	Thailand	28588
China, Hong Kong SAR	Türkiye	5755
China, Hong Kong SAR	Ukraine	24612
China, Hong Kong SAR	United Arab Emirates	48960
China, Hong Kong SAR	United Arab Emirates	630960
China, Hong Kong SAR	United Kingdom	535074
China, Hong Kong SAR	United Kingdom	2863434
China, Hong Kong SAR	USA	49057
China, Hong Kong SAR	USA	15170580
China, Hong Kong SAR	Venezuela	13521
China, Hong Kong SAR	Viet Nam	1143272
Colombia	United Kingdom	11138
Colombia	USA	64630309
Costa Rica	Germany	631
Costa Rica	Guatemala	5
Costa Rica	USA	24039
Costa Rica	USA	500
Côte d'Ivoire	Japan	2574.91
Croatia	Germany	895928
Croatia	Germany	4002
Cyprus	Greece	25856
Cyprus	Lebanon	3214
Cyprus	United Kingdom	74510
Czechia	Austria	61037
Czechia	Belgium	490011
Czechia	Canada	17900
Czechia	Denmark	1585897
Czechia	Egypt	67481
Czechia	Estonia	52192
Czechia	Estonia	11
Czechia	France	1120186
Czechia	Germany	83646742
Czechia	Germany	3177
Czechia	Greece	3226
Czechia	Hungary	11839852
Czechia	Hungary	256
Czechia	India	204581
Czechia	Israel	34873
Czechia	Italy	555939
Czechia	Latvia	3172537
Czechia	Lithuania	31568169
Czechia	Luxembourg	11604
Czechia	Netherlands	39570
Czechia	Norway	12068
Czechia	Peru	9214
Czechia	Poland	585657
Czechia	Poland	32
Czechia	Romania	75337
Czechia	Russian Federation	1705
Czechia	Serbia	665
Czechia	Singapore	2415
Czechia	Slovakia	9297393
Czechia	Slovakia	23024
Czechia	Slovenia	23790
Czechia	Slovenia	102
Czechia	Spain	11492
Czechia	Sweden	102
Czechia	Switzerland	12430903
Czechia	Switzerland	4191
Czechia	Türkiye	1750287
Czechia	Ukraine	348689
Czechia	United Kingdom	874278
Czechia	USA	2813044
Denmark	Austria	1021
Denmark	Bahamas	1460
Denmark	Belgium	511
Denmark	Canada	945
Denmark	Chad	1930
Denmark	Czechia	465
Denmark	Estonia	696
Denmark	Faeroe Isds	816
Denmark	Finland	1677
Denmark	Finland	4139
Denmark	France	1716
Denmark	Germany	36456
Denmark	Germany	48495
Denmark	Greece	183
Denmark	Greenland	62
Denmark	Hungary	8
Denmark	Iceland	83
Denmark	Italy	39636
Denmark	Lithuania	1191
Denmark	Netherlands	21680
Denmark	Nigeria	510
Denmark	Norway	193288
Denmark	Norway	19253
Denmark	Philippines	2729
Denmark	Poland	134852
Denmark	Portugal	46
Denmark	Russian Federation	20
Denmark	Spain	449
Denmark	Sweden	443
Denmark	Sweden	15472
Denmark	Switzerland	34556
Denmark	Switzerland	167
Denmark	Ukraine	69
Denmark	United Kingdom	29555
Denmark	United Kingdom	16923
Denmark	USA	9961
Dominican Rep.	USA	14696
Dominican Rep.	USA	20958
Ecuador	Canada	285
Egypt	Libya	165
El Salvador	USA	3620.55
Estonia	Belgium	30606184
Estonia	Latvia	9797
Estonia	Norway	22016
Estonia	Russian Federation	199
Estonia	United Kingdom	1094570
Ethiopia	Thailand	712.074
Ethiopia	Türkiye	9.882
Fiji	China, Hong Kong SAR	81377
Fiji	Cook Isds	1257
Finland	China	2068
Finland	Estonia	3218
Finland	Estonia	12104
Finland	France	5579026
Finland	Germany	7365472
Finland	Germany	1072
Finland	Mongolia	3981
Finland	Russian Federation	24978
Finland	Sweden	46707
Finland	Sweden	8287
Finland	Switzerland	26
Finland	United Kingdom	7396288
France	Albania	2043
France	Algeria	292
France	Argentina	267355
France	Australia	8692
France	Australia	571
France	Austria	11392
France	Austria	2263
France	Belgium	1274982
France	Belgium	3362
France	Br. Virgin Isds	1551
France	Bulgaria	1070
France	China	37109
France	China, Hong Kong SAR	14752
France	Congo	99
France	Cyprus	957
France	Czechia	2772
France	Denmark	22776
France	Egypt	76
France	Estonia	613
France	Finland	192392
France	Finland	265
France	French Polynesia	1040
France	French Polynesia	12447
France	Gabon	8358
France	Germany	26425742
France	Germany	176533
France	Greece	5543
France	Hungary	337
France	India	1702
France	India	101800
France	Iran	321
France	Ireland	1340
France	Italy	10407051
France	Italy	4001
France	Japan	4785
France	Japan	12357
France	Jordan	1821
France	Latvia	231
France	Lithuania	2186
France	Luxembourg	12463
France	Luxembourg	246
France	Malta	2775
France	Mexico	75501
France	Mexico	63899
France	Morocco	29070
France	Netherlands	2050070
France	Norway	56973
France	Other Asia, nes	324
France	Panama	112
France	Poland	208
France	Poland	28159
France	Portugal	16492
France	Portugal	838
France	Qatar	180341
France	Romania	156563
France	Romania	20058
France	Russian Federation	8651
France	Russian Federation	10900
France	Saudi Arabia	4306
France	Singapore	25215
France	Spain	8864508
France	Spain	2119
France	Sri Lanka	42147
France	Sweden	710910
France	Sweden	46
France	Switzerland	8569008
France	Switzerland	42754
France	Tunisia	18211
France	Ukraine	41112
France	United Arab Emirates	1814
France	United Arab Emirates	590
France	United Kingdom	15223913
France	United Kingdom	65177
France	USA	25884935
France	USA	2897
French Polynesia	Australia	19132
French Polynesia	Canada	9017
French Polynesia	China	36
French Polynesia	China, Hong Kong SAR	254224
French Polynesia	Denmark	22400
French Polynesia	France	151223
French Polynesia	Germany	1286
French Polynesia	Japan	559
French Polynesia	Luxembourg	21459
French Polynesia	Netherlands	76
French Polynesia	New Caledonia	29835
French Polynesia	New Zealand	646
French Polynesia	Switzerland	1411
French Polynesia	USA	388491
French Polynesia	Vanuatu	7487
French Polynesia	Wallis and Futuna Isds	31707
Georgia	Armenia	197
Georgia	Türkiye	123995
Germany	Albania	12942.8
Germany	Algeria	8873.56
Germany	Argentina	2.3094e+06
Germany	Armenia	1084.78
Germany	Armenia	538.532
Germany	Australia	1.39089e+07
Germany	Australia	15342.4
Germany	Austria	5.85715e+07
Germany	Austria	1.6913e+06
Germany	Azerbaijan	16724
Germany	Bahamas	119847
Germany	Bangladesh	2164.41
Germany	Belgium	1.67508e+08
Germany	Belgium	183828
Germany	Bosnia Herzegovina	20468.1
Germany	Brazil	2.18824e+08
Germany	Brunei Darussalam	4602.58
Germany	Bulgaria	17461.8
Germany	Bulgaria	9724.42
Germany	Canada	9.09422e+06
Germany	Canada	1303.27
Germany	Chile	21398.6
Germany	Chile	1400.95
Germany	China	2.29718e+08
Germany	China	15040.3
Germany	China, Hong Kong SAR	4.67191e+07
Germany	China, Hong Kong SAR	141715
Germany	China, Macao SAR	1263.43
Germany	Colombia	66.834
Germany	Colombia	758.314
Germany	Côte d'Ivoire	52.696
Germany	Croatia	757376
Germany	Croatia	256495
Germany	Cuba	4665.56
Germany	Curaçao	2848.18
Germany	Cyprus	557936
Germany	Cyprus	22692.9
Germany	Czechia	6.15227e+06
Germany	Czechia	193445
Germany	Denmark	6.9488e+06
Germany	Denmark	21800.9
Germany	Dominican Rep.	114.39
Germany	Ecuador	647.78
Germany	Egypt	10852.9
Germany	Estonia	696945
Germany	Estonia	5205.38
Germany	Finland	2.59375e+06
Germany	Finland	50185
Germany	France	1.94228e+08
Germany	France	337081
Germany	French Polynesia	307.182
Germany	Ghana	133.669
Germany	Greece	88495.3
Germany	Greece	4323.68
Germany	Hungary	1.32151e+06
Germany	Hungary	44047.8
Germany	Iceland	69063.2
Germany	India	1.71436e+07
Germany	India	6198.9
Germany	Indonesia	60.408
Germany	Iran	15213.8
Germany	Iraq	9541.91
Germany	Ireland	8.80752e+07
Germany	Ireland	2312.22
Germany	Israel	867991
Germany	Italy	3.38983e+07
Germany	Italy	228834
Germany	Japan	8.24742e+07
Germany	Japan	29043.4
Germany	Jordan	160.66
Germany	Kazakhstan	1741.55
Germany	Kazakhstan	10570.1
Germany	Kuwait	385789
Germany	Latvia	2.21702e+06
Germany	Latvia	9791.25
Germany	Lithuania	40352.6
Germany	Lithuania	16712.5
Germany	Luxembourg	994834
Germany	Luxembourg	90546.6
Germany	Malaysia	342072
Germany	Malaysia	151836
Germany	Malta	2610.4
Germany	Malta	6295.3
Germany	Mexico	3137.36
Germany	Mongolia	3512.67
Germany	Morocco	50658
Germany	Namibia	156.804
Germany	Netherlands	6.03658e+07
Germany	Netherlands	454482
Germany	New Zealand	1.53088e+06
Germany	North Macedonia	1182.46
Germany	Norway	7.61241e+06
Germany	Norway	273172
Germany	Oman	19983.5
Germany	Other Asia, nes	2.55213e+06
Germany	Pakistan	2813.47
Germany	Peru	18956.6
Germany	Poland	1.14681e+07
Germany	Poland	208554
Germany	Portugal	842193
Germany	Portugal	13688.2
Germany	Qatar	614317
Germany	Qatar	147180
Germany	Rep. of Korea	7.65463e+07
Germany	Romania	343322
Germany	Romania	50388.1
Germany	Russian Federation	1.39691e+06
Germany	Russian Federation	87947.8
Germany	Saudi Arabia	296465
Germany	Serbia	1.08924e+06
Germany	Singapore	5.17213e+07
Germany	Singapore	4252.99
Germany	Slovakia	7.95126e+06
Germany	Slovakia	33502.1
Germany	Slovenia	1.73169e+06
Germany	Slovenia	6000.97
Germany	South Africa	3.12797e+07
Germany	South Africa	366.304
Germany	Spain	8.29732e+06
Germany	Spain	50894.5
Germany	Sri Lanka	961.388
Germany	Sweden	6.90987e+06
Germany	Sweden	36824.5
Germany	Switzerland	5.03608e+08
Germany	Switzerland	3.14872e+06
Germany	Thailand	9.83259e+06
Germany	Trinidad and Tobago	2157.98
Germany	Tunisia	682013
Germany	Türkiye	1.51337e+06
Germany	Türkiye	42185.4
Germany	Ukraine	1.50867e+06
Germany	Ukraine	71709.5
Germany	United Arab Emirates	203625
Germany	United Arab Emirates	200006
Germany	United Kingdom	1.55764e+08
Germany	United Kingdom	269974
Germany	Uruguay	188.936
Germany	USA	4.5202e+08
Germany	USA	250344
Germany	Viet Nam	16919.4
Germany	Viet Nam	1799.39
Germany	Yemen	87.399
Germany	Zimbabwe	3538.37
Greece	Austria	99286
Greece	Bulgaria	21
Greece	Bulgaria	69
Greece	Cyprus	1441
Greece	France	667
Greece	Germany	2376
Greece	Italy	640407
Greece	Italy	20698
Greece	Poland	108
Greece	Romania	278
Greece	Spain	143
Greece	United Kingdom	54
Greenland	Denmark	244.21
Guatemala	Brazil	600
Guatemala	USA	29242
Honduras	USA	15366
Hungary	Austria	6675
Hungary	Belgium	619677
Hungary	Czechia	3895870
Hungary	Germany	848709
Hungary	Italy	371809
Hungary	Romania	840
Hungary	Romania	76
Hungary	Serbia	277
Hungary	Slovakia	65
Hungary	Switzerland	16076
India	Afghanistan	3245
India	Australia	882
India	Bahrain	583
India	Belgium	179128
India	Brazil	14003
India	Bulgaria	1428
India	China, Hong Kong SAR	2697
India	Finland	71
India	France	2210
India	Germany	387
India	Indonesia	13647
India	Israel	18216
India	Italy	2198
India	Japan	6447
India	Mauritius	1
India	Saudi Arabia	4798
India	Singapore	270
India	Sweden	11209
India	Switzerland	1306091
India	United Arab Emirates	6071
India	United Kingdom	520360
India	United Kingdom	2148
India	USA	1954927
India	USA	8061
Indonesia	Canada	141
Indonesia	Japan	195000
Indonesia	Singapore	5862
Indonesia	Spain	28
Ireland	China	191857
Ireland	China, Hong Kong SAR	3213.93
Ireland	France	815.051
Ireland	Germany	2922.1
Ireland	Germany	860.046
Ireland	Spain	3774.43
Ireland	Switzerland	455.092
Ireland	Switzerland	210.833
Ireland	United Kingdom	308515
Ireland	United Kingdom	17715.2
Ireland	USA	2.69321e+06
Ireland	USA	12323.5
Israel	Italy	170000
Israel	Japan	3000
Israel	United Kingdom	471000
Israel	USA	253000
Israel	USA	1000
Italy	Albania	16987
Italy	Algeria	1543
Italy	Argentina	41546
Italy	Armenia	34946
Italy	Australia	266726
Italy	Austria	2114156
Italy	Austria	7322
Italy	Bahrain	7592
Italy	Belarus	10284
Italy	Belgium	10705137
Italy	Belgium	23617
Italy	Brazil	22166
Italy	Bulgaria	100391
Italy	Canada	5785
Italy	China	693255
Italy	China, Hong Kong SAR	4533652
Italy	China, Hong Kong SAR	141295
Italy	Colombia	3684
Italy	Croatia	4883
Italy	Cyprus	454
Italy	Cyprus	2480
Italy	Czechia	32935033
Italy	Czechia	1828
Italy	Estonia	28
Italy	Finland	3251
Italy	France	29856215
Italy	France	37386
Italy	Germany	77884741
Italy	Germany	30927
Italy	Greece	141043
Italy	Greece	3329
Italy	Hungary	99166
Italy	Iceland	12421
Italy	India	1686461
Italy	India	9194
Italy	Indonesia	63592
Italy	Iran	97703
Italy	Iraq	5682
Italy	Ireland	6268
Italy	Israel	38599
Italy	Japan	32245
Italy	Japan	158751
Italy	Latvia	6507
Italy	Latvia	244
Italy	Lithuania	49836239
Italy	Malaysia	12469
Italy	Malta	841021
Italy	Malta	1064
Italy	Mauritius	3648
Italy	Netherlands	6474737
Italy	Netherlands	1291
Italy	Norway	600862
Italy	Other Africa, nes	7328
Italy	Other Asia, nes	385314
Italy	Peru	22238
Italy	Poland	413252
Italy	Poland	1748
Italy	Portugal	304124
Italy	Portugal	18258
Italy	Rep. of Korea	18799033
Italy	Rep. of Korea	1384
Italy	Romania	123796
Italy	Romania	1258
Italy	Russian Federation	7160
Italy	Saudi Arabia	88602
Italy	Seychelles	3269
Italy	Singapore	459895
Italy	Slovakia	15571
Italy	Slovakia	830
Italy	Slovenia	85465
Italy	Slovenia	7477
Italy	South Africa	4648
Italy	Spain	27955349
Italy	Spain	11552
Italy	Sweden	228191
Italy	Sweden	531
Italy	Switzerland	151036472
Italy	Switzerland	1229431
Italy	Thailand	1643742
Italy	Türkiye	188273
Italy	United Arab Emirates	66738
Italy	United Arab Emirates	13279
Italy	United Kingdom	181617946
Italy	United Kingdom	94587
Italy	USA	152772537
Italy	USA	152792
Italy	Viet Nam	49602
Jamaica	USA	35818
Japan	Australia	723533
Japan	Australia	26384
Japan	Austria	86893
Japan	Belgium	27085
Japan	Brunei Darussalam	14282
Japan	Bulgaria	249943
Japan	Canada	2216076
Japan	China	166328381
Japan	China	22300
Japan	China, Hong Kong SAR	332895968
Japan	China, Hong Kong SAR	8348046
Japan	China, Macao SAR	12139
Japan	Curaçao	294881
Japan	Czechia	34414
Japan	Denmark	63454
Japan	France	2145094
Japan	France	15860
Japan	French Polynesia	9797
Japan	Germany	15559803
Japan	Germany	3533
Japan	Guam	6602
Japan	India	23213830
Japan	Indonesia	72574
Japan	Italy	54546
Japan	Malaysia	55215559
Japan	Malaysia	162975
Japan	Mongolia	262935
Japan	Netherlands	12753
Japan	New Zealand	3206641
Japan	New Zealand	3633
Japan	Other Asia, nes	107556766
Japan	Other Asia, nes	874669
Japan	Philippines	585151
Japan	Rep. of Korea	57173562
Japan	Rep. of Korea	257372
Japan	Saudi Arabia	72023
Japan	Singapore	108237317
Japan	Singapore	230212
Japan	South Africa	2819
Japan	Switzerland	235037399
Japan	Switzerland	187041
Japan	Thailand	37143371
Japan	Thailand	28764
Japan	Türkiye	104582
Japan	United Arab Emirates	3725545
Japan	United Kingdom	48320356
Japan	United Kingdom	832789
Japan	USA	36797979
Japan	USA	564931
Japan	Viet Nam	10428972
Kyrgyzstan	United Arab Emirates	13548
Latvia	Estonia	266834
Latvia	Norway	91
Latvia	Poland	482977
Latvia	United Kingdom	1913362
Latvia	USA	1188
Lebanon	USA	17450
Lesotho	South Africa	73.082
Lithuania	Belarus	641
Lithuania	Estonia	34
Lithuania	France	166
Lithuania	Latvia	417
Lithuania	Poland	318912
Luxembourg	Belgium	32320
Luxembourg	France	188777
Luxembourg	Germany	240512
Luxembourg	Switzerland	318249
Malaysia	China	300027
Malaysia	China, Hong Kong SAR	28281
Malaysia	Japan	28741337
Malaysia	Other Asia, nes	56415
Malaysia	Rep. of Korea	1518340
Malaysia	Russian Federation	16576
Malaysia	Singapore	2110
Malaysia	Thailand	2924
Malaysia	United Kingdom	3169
Malaysia	USA	30382
Malaysia	USA	4894
Mauritius	France	2
Mauritius	Italy	795
Mauritius	Madagascar	84
Mauritius	South Africa	9809
Mexico	Areas, nes	94597
Mexico	Chile	4759
Mexico	Colombia	126
Mexico	Spain	790
Mexico	United Kingdom	33
Mexico	USA	5058543
Mexico	USA	718336
Morocco	USA	158444
Namibia	Germany	2398
Netherlands	Australia	274653
Netherlands	Austria	94002.9
Netherlands	Austria	9356.18
Netherlands	Belgium	675597
Netherlands	Belgium	65018.8
Netherlands	Brazil	7990.56
Netherlands	Canada	122074
Netherlands	China, Hong Kong SAR	14391.8
Netherlands	China, Hong Kong SAR	12626.2
Netherlands	Curaçao	5603.94
Netherlands	Czechia	523542
Netherlands	Denmark	1.62068e+06
Netherlands	Denmark	365.195
Netherlands	Finland	9453.91
Netherlands	France	489.927
Netherlands	France	9844.82
Netherlands	Germany	1.46022e+07
Netherlands	Germany	607256
Netherlands	Greece	2133.3
Netherlands	Iceland	17007.3
Netherlands	India	5555.07
Netherlands	Ireland	447745
Netherlands	Israel	6988.85
Netherlands	Italy	1.24587e+06
Netherlands	Italy	5810.97
Netherlands	Japan	46195.8
Netherlands	Jordan	2427.77
Netherlands	Kenya	3226.31
Netherlands	Lebanon	7260.17
Netherlands	Luxembourg	2879.12
Netherlands	Luxembourg	5224.6
Netherlands	New Zealand	15096.4
Netherlands	Norway	180800
Netherlands	Poland	15101.6
Netherlands	Poland	3837.11
Netherlands	Saudi Arabia	306.043
Netherlands	South Africa	2794.25
Netherlands	Spain	71537
Netherlands	Sweden	206946
Netherlands	Sweden	172.31
Netherlands	Switzerland	217088
Netherlands	Switzerland	6662.23
Netherlands	Thailand	321535
Netherlands	Ukraine	5340.33
Netherlands	United Kingdom	2.0787e+06
Netherlands	United Kingdom	4576.51
Netherlands	USA	230164
New Zealand	Australia	2.65621e+06
New Zealand	Australia	69274.2
New Zealand	Canada	4859.13
New Zealand	China, Hong Kong SAR	868.165
New Zealand	Cook Isds	11774.5
New Zealand	Fiji	186131
New Zealand	Germany	1.0942e+06
New Zealand	Japan	3482.38
New Zealand	Netherlands	1214.78
New Zealand	Samoa	7324.33
New Zealand	Thailand	51.831
New Zealand	United Kingdom	3198.93
New Zealand	USA	8078.3
New Zealand	USA	39354.1
Nicaragua	Costa Rica	5
Nicaragua	USA	1743
Norway	Denmark	9537
Norway	Finland	101829
Norway	Germany	11626242
Norway	Japan	68801458
Norway	Sweden	845839
Norway	United Arab Emirates	63410
Norway	United Kingdom	124861238
Norway	USA	177234061
Other Asia, nes	Australia	4661
Other Asia, nes	Bangladesh	6485
Other Asia, nes	Brazil	8681
Other Asia, nes	Canada	1486
Other Asia, nes	China	7831497
Other Asia, nes	China	15200
Other Asia, nes	China, Hong Kong SAR	8661524
Other Asia, nes	China, Hong Kong SAR	510419
Other Asia, nes	Colombia	1959
Other Asia, nes	France	3074
Other Asia, nes	Germany	49871494
Other Asia, nes	India	2162
Other Asia, nes	Iran	569666
Other Asia, nes	Italy	34048
Other Asia, nes	Japan	74325314
Other Asia, nes	Japan	116061
Other Asia, nes	Malaysia	26482628
Other Asia, nes	Netherlands	1520
Other Asia, nes	Rep. of Korea	155818
Other Asia, nes	Saudi Arabia	1419
Other Asia, nes	Singapore	115099751
Other Asia, nes	Switzerland	8255445
Other Asia, nes	United Kingdom	3724193
Other Asia, nes	USA	9489794
Other Asia, nes	USA	66779
Other Asia, nes	Viet Nam	14052
Paraguay	USA	10544
Peru	United Kingdom	276080
Peru	USA	569888
Philippines	France	41000
Philippines	India	9500
Philippines	Japan	115356
Philippines	Singapore	3118
Philippines	USA	51277
Poland	Areas, nes	7367
Poland	Belgium	18127
Poland	Belgium	271
Poland	Bunkers	20822
Poland	Canada	73
Poland	China, Hong Kong SAR	2503
Poland	Czechia	25474411
Poland	Czechia	130
Poland	Denmark	1
Poland	Estonia	1
Poland	Finland	13
Poland	France	2102
Poland	Germany	8319843
Poland	Germany	886
Poland	Greece	80
Poland	Hungary	293
Poland	Ireland	2
Poland	Italy	575
Poland	Lithuania	167
Poland	Netherlands	35493
Poland	Netherlands	1
Poland	New Zealand	58
Poland	Portugal	119
Poland	Romania	4358
Poland	Romania	4
Poland	Slovakia	1
Poland	Slovenia	6
Poland	Spain	767
Poland	Sweden	124
Poland	Switzerland	14447
Poland	Ukraine	219
Poland	United Kingdom	4804563
Poland	United Kingdom	2557
Poland	USA	4601596
Poland	USA	229
Portugal	Angola	239
Portugal	Belgium	261512
Portugal	Germany	258835
Portugal	Italy	342656
Portugal	Spain	117616
Portugal	Spain	15018
Portugal	United Kingdom	2643
Portugal	USA	24488
Rep. of Korea	China	346712
Rep. of Korea	China	9511
Rep. of Korea	China, Hong Kong SAR	5992640
Rep. of Korea	Germany	4332884
Rep. of Korea	India	3933
Rep. of Korea	Indonesia	112744
Rep. of Korea	Italy	268949
Rep. of Korea	Japan	61631897
Rep. of Korea	Japan	70473
Rep. of Korea	Mongolia	68
Rep. of Korea	Other Asia, nes	1723709
Rep. of Korea	Other Asia, nes	6894
Rep. of Korea	Philippines	1402
Rep. of Korea	South Africa	1285
Rep. of Korea	Spain	440
Rep. of Korea	Switzerland	177236
Rep. of Korea	United Kingdom	18828297
Rep. of Korea	USA	31310429
Rep. of Korea	Viet Nam	121663
Rep. of Korea	Viet Nam	1407
Russian Federation	Areas, nes	1214
Russian Federation	Belarus	21340180
Russian Federation	Belarus	5404
Russian Federation	China	163638
Russian Federation	China, Hong Kong SAR	28865064
Russian Federation	Czechia	45211
Russian Federation	Finland	271
Russian Federation	France	149
Russian Federation	Germany	310957446
Russian Federation	Italy	2106791
Russian Federation	Japan	326166226
Russian Federation	Kazakhstan	19905
Russian Federation	Kazakhstan	2508
Russian Federation	Latvia	323892
Russian Federation	Rep. of Moldova	48
Russian Federation	Switzerland	333166727
Russian Federation	Ukraine	356705
Russian Federation	Ukraine	493
Russian Federation	United Arab Emirates	98250302
Russian Federation	United Kingdom	171902004
Russian Federation	USA	388227959
Russian Federation	Uzbekistan	28000
Saint Lucia	USA	5550
Saudi Arabia	Germany	1626402
Senegal	Mauritania	24
Serbia	Switzerland	436891
Singapore	Australia	31675.6
Singapore	Australia	380451
Singapore	China	359103
Singapore	China	74103.5
Singapore	China, Hong Kong SAR	6.37521e+06
Singapore	China, Hong Kong SAR	363325
Singapore	France	1.47221e+06
Singapore	Germany	2.79999e+07
Singapore	India	4127.71
Singapore	Indonesia	116286
Singapore	Indonesia	107567
Singapore	Japan	4.06739e+07
Singapore	Japan	662660
Singapore	Malaysia	1.19839e+07
Singapore	Malaysia	229648
Singapore	Other Asia, nes	817220
Singapore	Other Asia, nes	167509
Singapore	Philippines	1622.91
Singapore	Rep. of Korea	788.25
Singapore	Switzerland	3995.67
Singapore	Thailand	35211.2
Singapore	Thailand	3972.46
Singapore	United Arab Emirates	5619.38
Singapore	United Kingdom	362032
Singapore	United Kingdom	204801
Singapore	USA	5.2469e+06
Singapore	USA	141311
Slovakia	Austria	477475
Slovakia	Croatia	488.22
Slovakia	Czechia	8.89968e+07
Slovakia	Czechia	57.816
Slovakia	Germany	1.02353e+06
Slovakia	Germany	626.977
Slovakia	Hungary	6.47154e+06
Slovakia	Poland	5.60356e+07
Slovakia	USA	19286
Slovakia	USA	1284.79
Slovenia	Austria	6349
Slovenia	Bosnia Herzegovina	14608
Slovenia	Bulgaria	684
Slovenia	Croatia	1207
Slovenia	Croatia	23261
Slovenia	Cyprus	17673
Slovenia	Czechia	8447
Slovenia	Germany	2908
Slovenia	Italy	49916
Slovenia	Montenegro	3912
Slovenia	North Macedonia	357
Slovenia	Serbia	12246
Slovenia	Serbia	11567
South Africa	Australia	11173.9
South Africa	Botswana	4077.36
South Africa	Botswana	10284.1
South Africa	Canada	1.88383e+07
South Africa	China	2.03989e+08
South Africa	China, Hong Kong SAR	6.60292e+08
South Africa	China, Hong Kong SAR	4698.8
South Africa	Eswatini	852.5
South Africa	Ethiopia	3059.33
South Africa	Germany	4.94356e+08
South Africa	India	2.12229e+07
South Africa	Italy	7.33712e+07
South Africa	Japan	2.54554e+09
South Africa	Lesotho	214.495
South Africa	Malawi	2474.8
South Africa	Mozambique	1152.62
South Africa	Namibia	14110.2
South Africa	Panama	2.92438e+07
South Africa	Papua New Guinea	1.9324e+07
South Africa	Rep. of Korea	2.71809e+07
South Africa	Sweden	56117.4
South Africa	Switzerland	1.26695e+09
South Africa	United Kingdom	1.19823e+09
South Africa	USA	1.36434e+09
South Africa	Zambia	1502.32
Spain	Andorra	720.907
Spain	Andorra	71985.1
Spain	Areas, nes	15174.1
Spain	Australia	5142.18
Spain	Austria	277.678
Spain	Belgium	989537
Spain	Canada	166.517
Spain	Chile	128.554
Spain	Chile	1591.12
Spain	China, Hong Kong SAR	40235
Spain	Croatia	1481.5
Spain	Cyprus	2639.72
Spain	Dominican Rep.	3359.49
Spain	France	1.09979e+07
Spain	France	16919.5
Spain	Germany	1.58415e+06
Spain	Germany	125.405
Spain	Gibraltar	6052.37
Spain	Greece	21833.7
Spain	Hungary	977014
Spain	India	12178.2
Spain	India	4382.06
Spain	Italy	805653
Spain	Italy	19773
Spain	Kuwait	1000.8
Spain	Latvia	127.667
Spain	Mexico	64891.2
Spain	Morocco	35756.8
Spain	Panama	6872.99
Spain	Peru	15171.5
Spain	Peru	122972
Spain	Poland	25241
Spain	Portugal	172143
Spain	Portugal	178343
Spain	Russian Federation	34658.7
Spain	Sweden	3585.78
Spain	Switzerland	88156.1
Spain	Switzerland	25.711
Spain	United Arab Emirates	2724.89
Spain	United Kingdom	2.23383e+07
Spain	United Kingdom	18299.3
Spain	USA	86132.6
Spain	USA	1384.39
Spain	Venezuela	2850.55
Sri Lanka	Japan	38157
Sweden	Austria	2214.05
Sweden	Belgium	3394.87
Sweden	Belgium	3099.66
Sweden	Canada	31734.6
Sweden	China	12103.4
Sweden	China, Hong Kong SAR	1623.63
Sweden	Cyprus	147.603
Sweden	Czechia	885.618
Sweden	Denmark	33063.1
Sweden	Denmark	81772.1
Sweden	Estonia	590.412
Sweden	Finland	371812
Sweden	Finland	125463
Sweden	Germany	25092.5
Sweden	Germany	13284.3
Sweden	Greece	885.618
Sweden	Italy	147.603
Sweden	Malaysia	47823.4
Sweden	Netherlands	1771.24
Sweden	Norway	40148
Sweden	Norway	320299
Sweden	Poland	89004.6
Sweden	Poland	738.015
Sweden	Romania	27601.8
Sweden	Spain	590.412
Sweden	United Kingdom	651962
Sweden	United Kingdom	295.206
Switzerland	Aruba	4567.38
Switzerland	Australia	1.04595e+06
Switzerland	Australia	22644.9
Switzerland	Austria	2.36835e+06
Switzerland	Austria	929461
Switzerland	Belgium	2.1163e+06
Switzerland	Belgium	10.666
Switzerland	Brazil	21258.3
Switzerland	Canada	1.14847e+08
Switzerland	Canada	1407.97
Switzerland	China	4.23699e+08
Switzerland	China, Hong Kong SAR	9.08599e+08
Switzerland	China, Hong Kong SAR	9.94868e+06
Switzerland	Costa Rica	75257.3
Switzerland	Czechia	4074.59
Switzerland	Denmark	1.48971e+06
Switzerland	Finland	708343
Switzerland	France	1.65504e+07
Switzerland	France	296743
Switzerland	Germany	2.45639e+08
Switzerland	Germany	1.33741e+06
Switzerland	Greece	33330.6
Switzerland	Greece	21332.9
Switzerland	Hungary	56243.2
Switzerland	Hungary	3756.73
Switzerland	India	541490
Switzerland	India	218659
Switzerland	Indonesia	2757.28
Switzerland	Ireland	11677.6
Switzerland	Israel	923199
Switzerland	Italy	6.94187e+07
Switzerland	Italy	3.11537e+06
Switzerland	Japan	8.34509e+07
Switzerland	Japan	3615.93
Switzerland	Kazakhstan	14712.3
Switzerland	Kuwait	21448.1
Switzerland	Lebanon	577759
Switzerland	Luxembourg	850213
Switzerland	Malaysia	1.93897e+06
Switzerland	Mexico	3999.93
Switzerland	Netherlands	4.25431e+06
Switzerland	Norway	209255
Switzerland	Other Asia, nes	16920.2
Switzerland	Panama	29533.3
Switzerland	Poland	3326.87
Switzerland	Portugal	8488.37
Switzerland	Qatar	2.97361e+06
Switzerland	Rep. of Korea	6.15803e+06
Switzerland	Romania	415.992
Switzerland	Russian Federation	10016.9
Switzerland	Saudi Arabia	172574
Switzerland	Singapore	12484
Switzerland	South Africa	1.29516e+06
Switzerland	Spain	2.21041e+06
Switzerland	Spain	7287.33
Switzerland	Sweden	981692
Switzerland	Thailand	129310
Switzerland	Türkiye	233246
Switzerland	Ukraine	254666
Switzerland	United Arab Emirates	2.16945e+06
Switzerland	United Arab Emirates	2457.55
Switzerland	United Kingdom	2.36504e+09
Switzerland	United Kingdom	653470
Switzerland	USA	8.40918e+07
Switzerland	USA	1.58737e+07
Thailand	Australia	3150
Thailand	Australia	3531045
Thailand	Austria	150036
Thailand	Belgium	43
Thailand	Belgium	531832
Thailand	Bulgaria	8023
Thailand	Cambodia	422
Thailand	Canada	1
Thailand	Canada	282
Thailand	China	3
Thailand	China	12777
Thailand	China, Hong Kong SAR	182318
Thailand	China, Hong Kong SAR	1414719
Thailand	Fiji	2050
Thailand	France	302
Thailand	France	475
Thailand	Germany	2973
Thailand	Germany	13829
Thailand	India	3500
Thailand	India	12485
Thailand	Indonesia	4876
Thailand	Indonesia	49
Thailand	Italy	2
Thailand	Italy	439
Thailand	Japan	1114026
Thailand	Japan	96213
Thailand	Malaysia	254171
Thailand	Malaysia	371
Thailand	New Zealand	10
Thailand	New Zealand	147
Thailand	Other Asia, nes	44
Thailand	Rep. of Korea	1
Thailand	Rep. of Korea	102
Thailand	Saudi Arabia	10
Thailand	Singapore	16022
Thailand	Singapore	60125
Thailand	Sweden	204
Thailand	Sweden	200
Thailand	Switzerland	2
Thailand	Ukraine	1
Thailand	United Arab Emirates	35
Thailand	United Arab Emirates	1
Thailand	United Kingdom	96999
Thailand	United Kingdom	34216
Thailand	USA	244448
Thailand	USA	68819
Thailand	Viet Nam	10
Türkiye	Austria	191
Türkiye	Azerbaijan	5482
Türkiye	Belgium	59969
Türkiye	Canada	4394
Türkiye	Free Zones	346
Türkiye	Georgia	577
Türkiye	Germany	50603
Türkiye	Germany	430
Türkiye	Iraq	153
Türkiye	Israel	21343
Türkiye	Kuwait	429
Türkiye	North Macedonia	629
Türkiye	Saudi Arabia	14244
Türkiye	Tajikistan	3400
Türkiye	Turkmenistan	6417
Türkiye	United Arab Emirates	105735
Türkiye	United Kingdom	8912251
Türkiye	USA	803896
Türkiye	USA	16170
Türkiye	Uzbekistan	466
Ukraine	Areas, nes	5538
Ukraine	Germany	6246243
Ukraine	Romania	9087
Ukraine	Russian Federation	679276
Ukraine	United Kingdom	94523
United Arab Emirates	Bahrain	327
United Arab Emirates	China, Hong Kong SAR	251395
United Arab Emirates	France	31920
United Arab Emirates	Germany	258473
United Arab Emirates	India	155861
United Arab Emirates	Iran	70231
United Arab Emirates	Kuwait	18
United Arab Emirates	Netherlands	911605
United Arab Emirates	Oman	1470
United Arab Emirates	Qatar	743
United Arab Emirates	Saudi Arabia	272
United Arab Emirates	Switzerland	77907086
United Arab Emirates	Thailand	197841
United Arab Emirates	Türkiye	110161
United Arab Emirates	United Kingdom	100558
United Arab Emirates	United Kingdom	830
United Arab Emirates	Yemen	352855
United Kingdom	Argentina	36287299
United Kingdom	Australia	7829997
United Kingdom	Australia	18222
United Kingdom	Austria	7192155
United Kingdom	Austria	10213
United Kingdom	Bahrain	42196
United Kingdom	Bangladesh	1980
United Kingdom	Barbados	631374
United Kingdom	Belgium	23906743
United Kingdom	Belgium	810
United Kingdom	Brazil	1728548
United Kingdom	Brunei Darussalam	3427
United Kingdom	Bulgaria	34682
United Kingdom	Canada	20896258
United Kingdom	China	248381074
United Kingdom	China, Hong Kong SAR	531956382
United Kingdom	China, Hong Kong SAR	144381
United Kingdom	Croatia	3231
United Kingdom	Cyprus	1083
United Kingdom	Cyprus	24832
United Kingdom	Czechia	3710277
United Kingdom	Czechia	153660
United Kingdom	Denmark	1075776
United Kingdom	Denmark	94979
United Kingdom	Egypt	509698
United Kingdom	Ethiopia	7607
United Kingdom	Finland	411561
United Kingdom	Finland	33412
United Kingdom	France	33180182
United Kingdom	France	373105
United Kingdom	Germany	513543794
United Kingdom	Germany	97464
United Kingdom	Gibraltar	4914
United Kingdom	Greece	999
United Kingdom	Greece	17497
United Kingdom	Hungary	411525
United Kingdom	Hungary	26133
United Kingdom	India	124570606
United Kingdom	Ireland	29348033
United Kingdom	Ireland	147161
United Kingdom	Israel	206575
United Kingdom	Israel	134140
United Kingdom	Italy	74110207
United Kingdom	Italy	118603
United Kingdom	Japan	277020156
United Kingdom	Japan	590659
United Kingdom	Kenya	2378
United Kingdom	Kuwait	2611
United Kingdom	Latvia	42131
United Kingdom	Latvia	6122
United Kingdom	Lebanon	8160
United Kingdom	Lithuania	5221930
United Kingdom	Lithuania	171
United Kingdom	Luxembourg	73912
United Kingdom	Luxembourg	9451
United Kingdom	Madagascar	98793
United Kingdom	Malaysia	145782
United Kingdom	Malta	870
United Kingdom	Mauritius	11492
United Kingdom	Mauritius	10744
United Kingdom	Mexico	635486
United Kingdom	Netherlands	1551617
United Kingdom	Netherlands	66909
United Kingdom	New Zealand	1536
United Kingdom	North Macedonia	377863417
United Kingdom	Norway	2536154
United Kingdom	Norway	181128
United Kingdom	Oman	8024
United Kingdom	Other Asia, nes	5692937
United Kingdom	Pakistan	103109
United Kingdom	Poland	7315136
United Kingdom	Poland	1411
United Kingdom	Portugal	205971
United Kingdom	Portugal	30104
United Kingdom	Qatar	140077
United Kingdom	Rep. of Korea	82034846
United Kingdom	Romania	3111633
United Kingdom	Russian Federation	51260
United Kingdom	Russian Federation	55510
United Kingdom	Saudi Arabia	29817
United Kingdom	Saudi Arabia	88048
United Kingdom	Singapore	170680
United Kingdom	Slovakia	133295832
United Kingdom	Slovakia	92252
United Kingdom	Slovenia	82429
United Kingdom	Slovenia	1916
United Kingdom	South Africa	12326470
United Kingdom	Spain	33870888
United Kingdom	Spain	577488
United Kingdom	Sweden	511159
United Kingdom	Sweden	101
United Kingdom	Switzerland	787675612
United Kingdom	Switzerland	1682133
United Kingdom	Thailand	251684
United Kingdom	Thailand	7463
United Kingdom	Türkiye	219745
United Kingdom	Türkiye	11860
United Kingdom	Ukraine	322540
United Kingdom	United Arab Emirates	24813
United Kingdom	United Arab Emirates	28300
United Kingdom	USA	1075514482
United Kingdom	USA	2392334
United Kingdom	Uzbekistan	1318432
United Kingdom	Viet Nam	2199
United Rep. of Tanzania	Dem. Rep. of the Congo	24850
United Rep. of Tanzania	Mauritius	15
United Rep. of Tanzania	Netherlands	84
USA	Afghanistan	3440
USA	Antigua and Barbuda	9580
USA	Argentina	4203425
USA	Aruba	14511
USA	Aruba	99691
USA	Australia	10398828
USA	Australia	550007
USA	Austria	1217004
USA	Bahamas	50765
USA	Barbados	2851
USA	Barbados	63534
USA	Belgium	11757974
USA	Belgium	13109
USA	Bermuda	29625
USA	Bolivia (Plurinational State of)	4532
USA	Brazil	106812472
USA	Bulgaria	4180
USA	Bulgaria	4800
USA	Cambodia	70037
USA	Canada	265435954
USA	Canada	3420923
USA	Cayman Isds	6356
USA	Cayman Isds	17485
USA	Chile	7500
USA	China	149129779
USA	China	2841
USA	China, Hong Kong SAR	51235090
USA	China, Hong Kong SAR	3646121
USA	Colombia	1248959
USA	Costa Rica	899577
USA	Cyprus	3148
USA	Czechia	556836
USA	Denmark	1572811
USA	Dominican Rep.	543381
USA	Dominican Rep.	2518
USA	Finland	51165
USA	France	6171783
USA	France	359043
USA	Germany	481371361
USA	Germany	341623
USA	Greece	19606
USA	Grenada	2572
USA	Iceland	16852
USA	India	28397104
USA	India	4925
USA	Iraq	14000
USA	Ireland	9391734
USA	Israel	11818885
USA	Israel	58984
USA	Italy	222101502
USA	Italy	69661
USA	Jamaica	40941
USA	Japan	244914762
USA	Japan	6069825
USA	Kuwait	174702
USA	Lao People's Dem. Rep.	1091012
USA	Latvia	120000
USA	Lebanon	87534
USA	Malaysia	265454
USA	Mexico	20496233
USA	Mexico	475501
USA	Morocco	63449
USA	Netherlands	1814083
USA	Netherlands	259561
USA	New Zealand	1519717
USA	New Zealand	34380
USA	Nicaragua	2789
USA	Nigeria	2775
USA	Norway	4049726
USA	Other Asia, nes	19351529
USA	Other Asia, nes	2566
USA	Pakistan	27940
USA	Panama	34000
USA	Philippines	160114
USA	Poland	2579533
USA	Qatar	57536
USA	Qatar	9050
USA	Rep. of Korea	367515861
USA	Rep. of Korea	11822
USA	Romania	102136
USA	Saint Lucia	15880
USA	Saudi Arabia	1079096
USA	Singapore	7490364
USA	Singapore	16056
USA	Sint Maarten	719220
USA	South Africa	221708
USA	Spain	768600
USA	Sri Lanka	26284
USA	Sweden	546601
USA	Switzerland	5055095
USA	Switzerland	1570575
USA	Thailand	4131812
USA	Thailand	310146
USA	Trinidad and Tobago	4296
USA	Türkiye	125930
USA	Türkiye	5100
USA	United Arab Emirates	1347185
USA	United Arab Emirates	99495
USA	United Kingdom	81183162
USA	United Kingdom	250617
USA	Uruguay	162739
USA	Viet Nam	129169
USA	Zimbabwe	12722
Viet Nam	China, Hong Kong SAR	911360
Viet Nam	Italy	633289
Viet Nam	Japan	1107122
Zambia	Kenya	2925.13
Zimbabwe	China	50
Zimbabwe	South Africa	1.44823e+08

## Sheet: 2013
source	target	weight
Andorra	France	369.369
Andorra	Spain	2629.89
Argentina	Venezuela	2304
Aruba	USA	251
Australia	Austria	72613
Australia	Brazil	3466
Australia	Canada	10069
Australia	China	55978
Australia	China, Hong Kong SAR	9976
Australia	China, Hong Kong SAR	1090389
Australia	Fiji	2220
Australia	Germany	18550
Australia	Germany	4874
Australia	India	2694
Australia	Indonesia	104381
Australia	Ireland	2924
Australia	Italy	4695
Australia	Japan	2827
Australia	Japan	58969
Australia	Netherlands	2004
Australia	New Caledonia	4777
Australia	New Caledonia	307533
Australia	New Zealand	35894
Australia	New Zealand	435010
Australia	Rep. of Korea	963
Australia	Seychelles	16291
Australia	Singapore	129792
Australia	Switzerland	233416
Australia	Switzerland	252690
Australia	Thailand	7062
Australia	Thailand	1253975
Australia	United Arab Emirates	1390052
Australia	United Kingdom	3189285
Australia	United Kingdom	85347
Australia	USA	15818
Australia	USA	1106339
Australia	Vanuatu	144371
Australia	Viet Nam	42270
Austria	Algeria	19010
Austria	Argentina	74725
Austria	Australia	612300
Austria	Belgium	3443300
Austria	Belgium	19383
Austria	Bulgaria	15191
Austria	Canada	53278
Austria	Chile	3968
Austria	China	20058
Austria	China, Hong Kong SAR	4346
Austria	China, Hong Kong SAR	56447
Austria	Croatia	38050
Austria	Czechia	1312752
Austria	Czechia	861
Austria	Denmark	63186
Austria	Egypt	133051
Austria	Estonia	15408
Austria	Finland	1036
Austria	France	1367721
Austria	Germany	114329182
Austria	Germany	455048
Austria	Greece	134372
Austria	Hungary	104501
Austria	Hungary	4000
Austria	Iceland	6044
Austria	Ireland	205641
Austria	Italy	3385075
Austria	Italy	7196
Austria	Japan	2578
Austria	Japan	29019
Austria	Kuwait	56799
Austria	Latvia	48160
Austria	Luxembourg	19034
Austria	Malta	74886
Austria	Malta	2522
Austria	Morocco	7862
Austria	Netherlands	670401
Austria	New Zealand	9463
Austria	Norway	34673
Austria	Poland	136877
Austria	Portugal	66246
Austria	Portugal	117
Austria	Rep. of Korea	3447
Austria	Romania	3635
Austria	Romania	11085
Austria	Russian Federation	139
Austria	Saudi Arabia	1017
Austria	Singapore	8269
Austria	Slovakia	614921
Austria	Slovakia	19422
Austria	Slovenia	5741506
Austria	Slovenia	6265
Austria	South Africa	47433
Austria	Spain	88426
Austria	Sweden	1061955
Austria	Switzerland	331885
Austria	Switzerland	53501
Austria	Thailand	10012
Austria	Thailand	825
Austria	Türkiye	1661773
Austria	United Arab Emirates	27117
Austria	United Kingdom	20427733
Austria	United Kingdom	1704
Austria	USA	2331323
Austria	USA	2760
Bahrain	Oman	272980
Bahrain	Oman	417048
Bahrain	United Arab Emirates	159
Barbados	USA	45696
Belgium	Australia	862.573
Belgium	Australia	7208.53
Belgium	Austria	62.922
Belgium	Azerbaijan	45793.3
Belgium	Brazil	2.42607e+06
Belgium	Canada	27484.6
Belgium	China	1.2439e+07
Belgium	China, Hong Kong SAR	36048.4
Belgium	Cuba	5453.02
Belgium	Egypt	659.733
Belgium	Finland	18.057
Belgium	France	10546.3
Belgium	France	1451.56
Belgium	Germany	4.92448e+08
Belgium	Germany	1321.55
Belgium	India	22916.9
Belgium	Iran	13856.5
Belgium	Ireland	13502.4
Belgium	Italy	8.24917e+06
Belgium	Kenya	5227.81
Belgium	Luxembourg	944.854
Belgium	Malaysia	577.651
Belgium	Netherlands	3.55027e+06
Belgium	Norway	13750.3
Belgium	Other Asia, nes	692.82
Belgium	Portugal	1049.67
Belgium	Russian Federation	333994
Belgium	Saudi Arabia	275.774
Belgium	Spain	463405
Belgium	Sudan	11966.8
Belgium	Switzerland	2.15224e+06
Belgium	Switzerland	6860.83
Belgium	Türkiye	1280.32
Belgium	Uganda	13189.6
Belgium	United Arab Emirates	4381.58
Belgium	United Kingdom	1.75598e+08
Belgium	USA	1.12723e+08
Belgium	USA	3853.31
Bermuda	USA	11736
Botswana	South Africa	730.376
Brazil	Argentina	1819
Brazil	Canada	50674
Brazil	Chile	6114
Brazil	Colombia	13813
Brazil	Italy	765
Brazil	Panama	255
Brazil	United Kingdom	29010
Brazil	USA	6844692
Brazil	USA	853
Bulgaria	Areas, nes	372
Bulgaria	Germany	53042
Bulgaria	United Kingdom	176253
Canada	Australia	18237
Canada	Australia	1732
Canada	China	4954
Canada	China, Hong Kong SAR	91301
Canada	China, Hong Kong SAR	315331
Canada	Czechia	1500
Canada	Faeroe Isds	11390
Canada	France	3286
Canada	Germany	18339148
Canada	Israel	10008
Canada	Mexico	521679
Canada	Singapore	4978
Canada	Singapore	2801
Canada	Spain	5543
Canada	Sweden	3689
Canada	Switzerland	2096
Canada	Thailand	233
Canada	Trinidad and Tobago	746
Canada	United Arab Emirates	1432
Canada	United Kingdom	106449349
Canada	USA	105339122
Canada	USA	619819
China	Australia	188785
China	Austria	56230
China	Bangladesh	40452
China	Belarus	75
China	Belgium	36740
China	Brazil	29342
China	Canada	351348
China	Chile	19433
China	China, Hong Kong SAR	210344
China	China, Hong Kong SAR	16858147
China	China, Macao SAR	425
China	Costa Rica	2852
China	Czechia	26339
China	Dem. Rep. of the Congo	23
China	Denmark	70964
China	Estonia	3125
China	Finland	8940
China	France	129119
China	Germany	1397309
China	Germany	698318
China	Ghana	3719
China	India	10496
China	India	396340
China	Indonesia	45480
China	Ireland	886
China	Israel	13844
China	Italy	98877
China	Japan	50728992
China	Japan	1289377
China	Latvia	2141
China	Lebanon	1397
China	Luxembourg	8118
China	Malaysia	86684
China	Maldives	156
China	Mauritius	815
China	Mexico	90139
China	Netherlands	78140
China	New Zealand	23719
China	Norway	32088
China	Other Asia, nes	2194
China	Other Asia, nes	100436
China	Papua New Guinea	80
China	Philippines	3478
China	Poland	13296
China	Portugal	8989
China	Rep. of Korea	1942
China	Rep. of Korea	98624
China	Russian Federation	4106941
China	Saudi Arabia	5472
China	Singapore	178353
China	Slovakia	2020
China	Slovenia	691
China	Spain	89788
China	Sri Lanka	600
China	Sweden	88360
China	Switzerland	9849570
China	Thailand	133099
China	Türkiye	1300
China	United Arab Emirates	346977
China	United Kingdom	2712387
China	United Kingdom	689966
China	Uruguay	6798
China	USA	10490762
China	USA	6955978
China	Viet Nam	2828
China, Hong Kong SAR	Aruba	1304
China, Hong Kong SAR	Australia	5745351
China, Hong Kong SAR	Australia	570939
China, Hong Kong SAR	Austria	163000
China, Hong Kong SAR	Belgium	14640
China, Hong Kong SAR	Brazil	36559
China, Hong Kong SAR	Canada	334292
China, Hong Kong SAR	China	677898517
China, Hong Kong SAR	China	2131564
China, Hong Kong SAR	China, Macao SAR	595100
China, Hong Kong SAR	Cyprus	1234
China, Hong Kong SAR	Denmark	68257
China, Hong Kong SAR	Dominican Rep.	224
China, Hong Kong SAR	Estonia	27023
China, Hong Kong SAR	Fiji	61933
China, Hong Kong SAR	Finland	33809
China, Hong Kong SAR	France	2530569
China, Hong Kong SAR	Germany	10726
China, Hong Kong SAR	Germany	1923162
China, Hong Kong SAR	Greece	14993
China, Hong Kong SAR	Hungary	7414
China, Hong Kong SAR	India	643130
China, Hong Kong SAR	India	237579
China, Hong Kong SAR	Indonesia	56210
China, Hong Kong SAR	Ireland	6649
China, Hong Kong SAR	Israel	5825
China, Hong Kong SAR	Italy	49961
China, Hong Kong SAR	Italy	1071099
China, Hong Kong SAR	Japan	17922784
China, Hong Kong SAR	Japan	871082
China, Hong Kong SAR	Kazakhstan	17796
China, Hong Kong SAR	LAIA, nes	8618
China, Hong Kong SAR	Lao People's Dem. Rep.	772
China, Hong Kong SAR	Latvia	24879
China, Hong Kong SAR	Luxembourg	47037
China, Hong Kong SAR	Malaysia	21144
China, Hong Kong SAR	Malaysia	254746
China, Hong Kong SAR	Malta	20120
China, Hong Kong SAR	Mexico	180009
China, Hong Kong SAR	Mongolia	7614
China, Hong Kong SAR	Myanmar	415
China, Hong Kong SAR	Nepal	6576
China, Hong Kong SAR	Netherlands	53338
China, Hong Kong SAR	New Zealand	88376
China, Hong Kong SAR	Norway	16276
China, Hong Kong SAR	Oceania, nes	35844
China, Hong Kong SAR	Other Asia, nes	8130875
China, Hong Kong SAR	Other Asia, nes	1332187
China, Hong Kong SAR	Papua New Guinea	5928
China, Hong Kong SAR	Philippines	3655
China, Hong Kong SAR	Poland	546982
China, Hong Kong SAR	Portugal	51244
China, Hong Kong SAR	Qatar	65886
China, Hong Kong SAR	Rep. of Korea	216621
China, Hong Kong SAR	Romania	73328
China, Hong Kong SAR	Russian Federation	774371
China, Hong Kong SAR	Singapore	301506
China, Hong Kong SAR	Singapore	1357928
China, Hong Kong SAR	Slovakia	15087
China, Hong Kong SAR	South Africa	19299
China, Hong Kong SAR	Spain	202878
China, Hong Kong SAR	Sri Lanka	264264
China, Hong Kong SAR	Sweden	291726
China, Hong Kong SAR	Switzerland	4137098
China, Hong Kong SAR	Thailand	2881174
China, Hong Kong SAR	Thailand	93048
China, Hong Kong SAR	Ukraine	1628
China, Hong Kong SAR	United Arab Emirates	2519409
China, Hong Kong SAR	United Kingdom	2613986
China, Hong Kong SAR	USA	1674865
China, Hong Kong SAR	USA	14102592
China, Hong Kong SAR	Viet Nam	706764
China, Hong Kong SAR	Viet Nam	3237
Colombia	Costa Rica	15
Colombia	El Salvador	1
Colombia	Guatemala	1
Colombia	Honduras	1
Colombia	Japan	5569
Colombia	United Kingdom	5000
Colombia	USA	74521938
Costa Rica	Spain	235
Costa Rica	USA	225838
Côte d'Ivoire	France	164.816
Croatia	Areas, nes	203
Croatia	Germany	7435958
Croatia	Germany	3852
Croatia	Slovenia	544
Croatia	United Kingdom	573271
Cyprus	United Kingdom	8367.14
Czechia	Austria	85386
Czechia	Austria	29
Czechia	Belgium	489359
Czechia	Canada	591
Czechia	China, Hong Kong SAR	5447
Czechia	Denmark	1084403
Czechia	Egypt	38774
Czechia	France	987931
Czechia	Germany	76120855
Czechia	Germany	3488
Czechia	Greece	4017
Czechia	Hungary	24048697
Czechia	Hungary	246
Czechia	India	416902
Czechia	Iran	1873
Czechia	Israel	85013
Czechia	Italy	755817
Czechia	Japan	515623
Czechia	Latvia	787043
Czechia	Lithuania	488799
Czechia	Luxembourg	11103
Czechia	Netherlands	96839
Czechia	Poland	32199909
Czechia	Romania	69687
Czechia	Serbia	4773
Czechia	Singapore	16922
Czechia	Slovakia	3962800
Czechia	Slovakia	112114
Czechia	Slovenia	16214
Czechia	Slovenia	13
Czechia	Spain	95720
Czechia	Sweden	1262
Czechia	Switzerland	11169719
Czechia	Switzerland	3493
Czechia	Türkiye	1193507
Czechia	Ukraine	389229
Czechia	United Kingdom	4899798
Czechia	USA	3883011
Czechia	USA	480
Denmark	Algeria	317
Denmark	Armenia	167
Denmark	Australia	1671
Denmark	Austria	78109
Denmark	Azerbaijan	1727
Denmark	Belarus	1144
Denmark	Belgium	2118
Denmark	Brazil	419
Denmark	Bulgaria	14492
Denmark	Burkina Faso	317
Denmark	Canada	489
Denmark	China	972
Denmark	Cuba	473
Denmark	Cyprus	111
Denmark	Czechia	843
Denmark	Egypt	245
Denmark	Estonia	1227
Denmark	Ethiopia	340
Denmark	Faeroe Isds	210
Denmark	Finland	2467
Denmark	France	10006
Denmark	Germany	1326
Denmark	Germany	176781
Denmark	Greece	5065
Denmark	Greenland	9502
Denmark	Hungary	9190
Denmark	Iceland	85
Denmark	Iran	440
Denmark	Ireland	790
Denmark	Israel	19591
Denmark	Italy	32804
Denmark	Italy	45860
Denmark	Japan	1902
Denmark	Kazakhstan	151
Denmark	Kenya	125
Denmark	Kyrgyzstan	388
Denmark	Lithuania	1218
Denmark	Mauritania	83
Denmark	Mongolia	76
Denmark	Morocco	36
Denmark	Netherlands	13843
Denmark	Nigeria	296
Denmark	Norway	15821
Denmark	Norway	36555
Denmark	Pakistan	133
Denmark	Peru	202
Denmark	Philippines	175
Denmark	Poland	3974
Denmark	Portugal	1157
Denmark	Rep. of Korea	2003
Denmark	Romania	4146
Denmark	Russian Federation	11117
Denmark	Rwanda	97
Denmark	Senegal	616
Denmark	Serbia	863
Denmark	Singapore	57
Denmark	Slovakia	725
Denmark	Spain	817
Denmark	Sweden	1941
Denmark	Sweden	10813
Denmark	Switzerland	34105
Denmark	Switzerland	3298
Denmark	Tajikistan	252
Denmark	Tunisia	467
Denmark	Türkiye	381
Denmark	Turkmenistan	947
Denmark	Ukraine	6329
Denmark	United Arab Emirates	1190
Denmark	United Kingdom	10366
Denmark	USA	5723
Denmark	Uzbekistan	646
Denmark	Viet Nam	608
Denmark	Zambia	98
Dominican Rep.	Haiti	46
Dominican Rep.	USA	3020
Estonia	Belgium	10495960
Estonia	Cyprus	6310442
Estonia	Czechia	3770
Estonia	Latvia	266
Estonia	Russian Federation	378
Estonia	Russian Federation	412
Ethiopia	France	975.347
Ethiopia	Germany	43536.1
Ethiopia	USA	15969.8
Fiji	Kiribati	44
Fiji	New Zealand	116
Finland	Denmark	1942
Finland	Estonia	8913
Finland	Estonia	112695
Finland	Germany	216242
Finland	Germany	618
Finland	Poland	615789
Finland	Russian Federation	35962
Finland	Sweden	15974385
Finland	Sweden	2526
Finland	Tunisia	1197855
Finland	United Kingdom	22160663
France	Algeria	239751
France	Algeria	924
France	Argentina	115694
France	Australia	13
France	Austria	46272
France	Austria	8017
France	Belgium	3064168
France	Belgium	91829
France	Brazil	14099
France	Bulgaria	1093
France	Burkina Faso	201
France	Canada	33195
France	China	179606
France	China, Hong Kong SAR	53113
France	China, Hong Kong SAR	519362
France	Cyprus	2001
France	Cyprus	101
France	Czechia	3697
France	Czechia	793
France	Denmark	13461
France	Finland	165045
France	Germany	37952003
France	Germany	604612
France	Greece	1878
France	Greece	121
France	Hungary	106
France	India	6767
France	Italy	26213148
France	Italy	1373
France	Japan	2706
France	Lithuania	1068
France	Luxembourg	7837
France	Luxembourg	54
France	Madagascar	1965
France	Mauritius	2224
France	Mexico	33983
France	Morocco	16566
France	Netherlands	2407982
France	Netherlands	41
France	New Caledonia	3184
France	Norway	57647
France	Philippines	2271
France	Poland	430
France	Poland	621
France	Portugal	1653
France	Portugal	599
France	Romania	207792
France	Romania	16133
France	Singapore	36030
France	Singapore	15890
France	Slovakia	185
France	Spain	3552416
France	Spain	4415
France	Sweden	679085
France	Sweden	276650
France	Switzerland	5731749
France	Switzerland	333192
France	United Arab Emirates	86715
France	United Kingdom	15173480
France	United Kingdom	1150174
France	USA	10431306
France	USA	174081
France	Viet Nam	116358
French Polynesia	Australia	102
French Polynesia	Cayman Isds	4870
French Polynesia	China, Hong Kong SAR	209081
French Polynesia	Denmark	31701
French Polynesia	Fiji	559
French Polynesia	France	210901
French Polynesia	Luxembourg	15089
French Polynesia	New Caledonia	39753
French Polynesia	New Zealand	8248
French Polynesia	Türkiye	8523
French Polynesia	Uruguay	2192
French Polynesia	USA	683025
French Polynesia	Vanuatu	3568
French Polynesia	Wallis and Futuna Isds	24939
Germany	Albania	10090
Germany	Angola	1047.78
Germany	Angola	435.578
Germany	Argentina	174709
Germany	Australia	1.12439e+07
Germany	Australia	64314.2
Germany	Austria	6.85272e+07
Germany	Austria	1.11519e+06
Germany	Azerbaijan	19235.8
Germany	Bahamas	31183.7
Germany	Bahrain	1964.09
Germany	Belgium	1.88442e+08
Germany	Belgium	197486
Germany	Bermuda	916.308
Germany	Bosnia Herzegovina	34607.2
Germany	Brazil	1.72195e+08
Germany	Brunei Darussalam	1903
Germany	Bulgaria	14957.1
Germany	Bulgaria	9043.56
Germany	Bunkers	6218.94
Germany	Canada	3.24164e+06
Germany	Canada	1382.43
Germany	Chile	47807.4
Germany	China	2.6054e+08
Germany	China	1217.76
Germany	China, Hong Kong SAR	1.98682e+07
Germany	China, Hong Kong SAR	149476
Germany	Colombia	298.796
Germany	Costa Rica	338.636
Germany	Croatia	7.27246e+06
Germany	Croatia	722.422
Germany	Curaçao	1655.99
Germany	Cyprus	16397.9
Germany	Cyprus	26021.8
Germany	Czechia	3.29634e+06
Germany	Czechia	122217
Germany	Denmark	7.83802e+06
Germany	Denmark	26501.2
Germany	Dominican Rep.	27.888
Germany	Ecuador	286.844
Germany	Egypt	6270.73
Germany	Egypt	2118.13
Germany	Estonia	41028
Germany	Estonia	12159
Germany	Finland	800712
Germany	Finland	27272.8
Germany	France	1.61646e+08
Germany	France	443824
Germany	Georgia	12930.6
Germany	Georgia	1512.57
Germany	Greece	42183.4
Germany	Greece	948.179
Germany	Honduras	2507.23
Germany	Hungary	1.62997e+06
Germany	Hungary	31101.3
Germany	Iceland	85045.3
Germany	Iceland	1199.17
Germany	India	2.51158e+07
Germany	Iran	36330.9
Germany	Iraq	1616.15
Germany	Ireland	7.76777e+07
Germany	Ireland	4512.48
Germany	Israel	977614
Germany	Italy	2.98345e+07
Germany	Italy	385896
Germany	Japan	5.51082e+07
Germany	Japan	45747.7
Germany	Kazakhstan	517.913
Germany	Kazakhstan	2632.06
Germany	Kenya	366.523
Germany	Kuwait	424860
Germany	Latvia	17469.6
Germany	Latvia	14176.2
Germany	Lithuania	40387.9
Germany	Lithuania	12105.9
Germany	Luxembourg	770149
Germany	Luxembourg	37631
Germany	Malaysia	174573
Germany	Malaysia	147976
Germany	Malta	626.808
Germany	Malta	10793.8
Germany	Mexico	26125.4
Germany	Mongolia	16143
Germany	Mozambique	88.975
Germany	Namibia	914.98
Germany	Netherlands	3.51589e+07
Germany	Netherlands	371635
Germany	New Zealand	237832
Germany	Nigeria	1324
Germany	North Macedonia	127.486
Germany	Norway	1.66847e+07
Germany	Norway	166834
Germany	Oman	57990.3
Germany	Other Asia, nes	4.09625e+06
Germany	Other Asia, nes	59.759
Germany	Pakistan	1152.69
Germany	Philippines	750.31
Germany	Poland	8.74844e+06
Germany	Poland	253975
Germany	Portugal	220417
Germany	Portugal	4991.89
Germany	Qatar	1.24709e+06
Germany	Qatar	57799.1
Germany	Rep. of Korea	9.72645e+07
Germany	Romania	516309
Germany	Romania	40237.9
Germany	Russian Federation	1.12038e+06
Germany	Russian Federation	77932.6
Germany	Rwanda	99.599
Germany	Saudi Arabia	150855
Germany	Saudi Arabia	58391.4
Germany	Senegal	107.567
Germany	Serbia	1.92163e+06
Germany	Singapore	4.31718e+07
Germany	Singapore	4776.75
Germany	Slovakia	1.34188e+07
Germany	Slovakia	47292.1
Germany	Slovenia	534166
Germany	Slovenia	8119.28
Germany	South Africa	4.01546e+07
Germany	South Africa	6511.1
Germany	Spain	8.35922e+06
Germany	Spain	34153.1
Germany	Sweden	7.5468e+06
Germany	Sweden	30244.8
Germany	Switzerland	4.03118e+08
Germany	Switzerland	3.01497e+06
Germany	Thailand	1.0986e+07
Germany	Trinidad and Tobago	2608.16
Germany	Tunisia	8233.49
Germany	Türkiye	1.12231e+06
Germany	Türkiye	105200
Germany	Ukraine	3.05232e+06
Germany	Ukraine	30648.5
Germany	United Arab Emirates	81953.8
Germany	United Arab Emirates	370272
Germany	United Kingdom	9.80717e+07
Germany	United Kingdom	295997
Germany	United Rep. of Tanzania	31.872
Germany	Uruguay	37581.9
Germany	USA	7.06727e+08
Germany	USA	456526
Germany	Uzbekistan	255282
Germany	Vanuatu	856.549
Germany	Viet Nam	186030
Greece	Austria	84022
Greece	Belgium	90
Greece	Cyprus	2729
Greece	Italy	187
Greece	Netherlands	7083
Greece	Spain	376
Greece	United Kingdom	5738
Greece	United Kingdom	907
Guatemala	Mexico	573
Guatemala	USA	15364
Hungary	Austria	3010
Hungary	Belgium	197649
Hungary	Cyprus	799852
Hungary	Germany	2769602
Hungary	Israel	11897
Hungary	Serbia	734
Hungary	Slovakia	8
Hungary	Slovakia	11
India	Afghanistan	65133
India	Australia	3891
India	Australia	104
India	Belgium	301658
India	Botswana	5740
India	Bulgaria	1484
India	Canada	8943
India	China	4973
India	China, Hong Kong SAR	253738
India	China, Hong Kong SAR	76492
India	France	22733
India	Germany	781200
India	Guyana	6
India	Ireland	583
India	Israel	15257
India	Italy	4045
India	Japan	1228
India	Malaysia	140
India	Netherlands	12447
India	Norway	5227
India	Panama	230
India	Saudi Arabia	5376
India	Singapore	266235
India	Singapore	882
India	Spain	5436
India	Sweden	40525
India	United Arab Emirates	9492
India	United Kingdom	6577196
India	USA	115150
India	USA	65186
Indonesia	China, Hong Kong SAR	104114
Indonesia	Japan	315073
Indonesia	Malaysia	16497
Indonesia	Singapore	9
Indonesia	Singapore	5940
Indonesia	USA	30
Ireland	Australia	4446.54
Ireland	Austria	5291.22
Ireland	Canada	687.965
Ireland	China	110910
Ireland	Costa Rica	7143.95
Ireland	France	209.843
Ireland	Germany	189943
Ireland	Germany	1529.99
Ireland	Mexico	1328.12
Ireland	Portugal	61559.6
Ireland	Rep. of Korea	3232.64
Ireland	South Africa	3320.3
Ireland	Spain	1604.37
Ireland	Spain	2150.22
Ireland	Thailand	243.046
Ireland	United Kingdom	343643
Ireland	United Kingdom	76785.1
Ireland	USA	2.0947e+06
Israel	Canada	172000
Israel	China, Hong Kong SAR	66000
Israel	India	42000
Israel	Spain	28000
Israel	Switzerland	12000
Israel	Switzerland	1000
Israel	United Kingdom	21000
Israel	USA	101000
Israel	USA	1000
Italy	Albania	33114
Italy	Armenia	11679
Italy	Australia	45740
Italy	Austria	466572
Italy	Austria	8332
Italy	Belgium	18974751
Italy	Belgium	15647
Italy	Brazil	14746
Italy	Bulgaria	1398777
Italy	Bulgaria	212
Italy	Canada	57968
Italy	China	797583
Italy	China	11409
Italy	China, Hong Kong SAR	2589295
Italy	China, Hong Kong SAR	126216
Italy	Croatia	86742
Italy	Croatia	3755
Italy	Cyprus	424769
Italy	Cyprus	2049
Italy	Czechia	21912688
Italy	Czechia	1702
Italy	Denmark	157
Italy	Estonia	179
Italy	Estonia	54
Italy	France	42091558
Italy	France	58622
Italy	Germany	59761800
Italy	Germany	75261
Italy	Greece	35616
Italy	Greece	28471
Italy	Hungary	813220
Italy	Hungary	23
Italy	Iceland	5296
Italy	India	3478329
Italy	Indonesia	96848
Italy	Iran	50470
Italy	Ireland	12246
Italy	Israel	49332
Italy	Japan	2208949
Italy	Japan	7476
Italy	Lithuania	15563312
Italy	Malaysia	17219
Italy	Malta	178430
Italy	Mexico	9804
Italy	Netherlands	6860261
Italy	Netherlands	728
Italy	Norway	319677
Italy	Other Asia, nes	334821
Italy	Peru	25953
Italy	Philippines	4133
Italy	Poland	3432842
Italy	Poland	1022
Italy	Portugal	1714901
Italy	Portugal	4132
Italy	Romania	72095
Italy	Romania	1510
Italy	Russian Federation	44143
Italy	Russian Federation	12235
Italy	Saudi Arabia	51158
Italy	Seychelles	4473
Italy	Singapore	458906
Italy	Slovakia	50546
Italy	Slovakia	2563
Italy	Slovenia	909
Italy	Slovenia	409
Italy	South Africa	152262
Italy	Spain	32714227
Italy	Spain	20144
Italy	Sri Lanka	24829
Italy	Sweden	39872
Italy	Sweden	1828
Italy	Switzerland	163675081
Italy	Switzerland	1903749
Italy	Thailand	548267
Italy	Tunisia	7735
Italy	Türkiye	191454
Italy	United Arab Emirates	43552
Italy	United Kingdom	151957804
Italy	United Kingdom	14176
Italy	Uruguay	16205
Italy	USA	360554730
Italy	USA	1580
Italy	Viet Nam	175274
Japan	Australia	557728
Japan	Australia	13669
Japan	Austria	9513336
Japan	Belgium	444387
Japan	Bulgaria	224960
Japan	Canada	2492105
Japan	Canada	66728
Japan	China	197682264
Japan	China	7081
Japan	China, Hong Kong SAR	546945102
Japan	China, Hong Kong SAR	5140496
Japan	Curaçao	2941
Japan	Czechia	103360
Japan	Denmark	67117
Japan	Estonia	3238
Japan	Fiji	35280
Japan	France	3991256
Japan	France	11548
Japan	Germany	14949659
Japan	Germany	2531
Japan	India	8183064
Japan	Indonesia	59299
Japan	Indonesia	8341
Japan	Ireland	28609
Japan	Italy	39932
Japan	Italy	29347
Japan	Malaysia	31799993
Japan	Malaysia	151654
Japan	Malta	126611
Japan	Mongolia	109273
Japan	New Zealand	3058400
Japan	Other Asia, nes	106673158
Japan	Other Asia, nes	798427
Japan	Philippines	990464
Japan	Portugal	81422
Japan	Rep. of Korea	52735988
Japan	Rep. of Korea	254625
Japan	Singapore	105456616
Japan	Singapore	884993
Japan	Slovakia	112193
Japan	Sri Lanka	3166
Japan	Switzerland	372188830
Japan	Switzerland	15627
Japan	Thailand	35935392
Japan	Thailand	86842
Japan	Türkiye	95593
Japan	United Arab Emirates	12911204
Japan	United Arab Emirates	39543
Japan	United Kingdom	2616748
Japan	United Kingdom	629026
Japan	USA	23881740
Japan	USA	1099071
Japan	Viet Nam	11480739
Kazakhstan	United Kingdom	585633
Kenya	Areas, nes	36788
Kenya	China	800
Kuwait	Bahrain	28
Kuwait	India	10155
Kuwait	United Arab Emirates	5111
Latvia	Estonia	6504
Latvia	Poland	433281
Latvia	Spain	18231
Lebanon	Cyprus	15257
Lebanon	Free Zones	131
Lebanon	Germany	101559
Lebanon	USA	91279
Lithuania	Belarus	138
Lithuania	Latvia	637
Lithuania	Poland	198749
Lithuania	Ukraine	20150
Luxembourg	Belgium	778
Luxembourg	Canada	33
Luxembourg	China	24
Luxembourg	France	202511
Luxembourg	Germany	146661
Luxembourg	Germany	93
Luxembourg	Switzerland	469154
Malawi	Australia	27.716
Malawi	South Africa	27.442
Malaysia	Australia	2033
Malaysia	China, Hong Kong SAR	126978
Malaysia	Germany	38499
Malaysia	Japan	7223290
Malaysia	New Zealand	5673
Malaysia	Singapore	5233
Malaysia	Singapore	24588
Malaysia	Switzerland	15903
Malaysia	Thailand	4067
Malaysia	USA	1829949
Mexico	Colombia	268
Mexico	France	5045
Mexico	Germany	5590
Mexico	Spain	67639
Mexico	United Kingdom	4
Mexico	USA	3530874
Mexico	USA	674595
Morocco	Spain	21
Mozambique	Thailand	6982
Namibia	Zambia	107
Nepal	Japan	2022
Netherlands	Australia	69469
Netherlands	Austria	47087.8
Netherlands	Belgium	343773
Netherlands	Belgium	64878
Netherlands	Canada	47232.6
Netherlands	Canada	3764.95
Netherlands	China, Hong Kong SAR	5843.31
Netherlands	Cyprus	2.03946e+06
Netherlands	Denmark	684587
Netherlands	Finland	335304
Netherlands	France	34595.1
Netherlands	France	25166.1
Netherlands	Germany	1.11427e+07
Netherlands	Germany	217270
Netherlands	Grenada	5185.94
Netherlands	Iceland	19435.7
Netherlands	India	4705.19
Netherlands	Ireland	57459.7
Netherlands	Italy	950034
Netherlands	Japan	12780.9
Netherlands	Jordan	1289.51
Netherlands	Luxembourg	19601.7
Netherlands	Luxembourg	491.369
Netherlands	Norway	54959
Netherlands	Oman	71.713
Netherlands	Poland	5314.76
Netherlands	Slovenia	2557.78
Netherlands	Spain	305310
Netherlands	Suriname	5865.89
Netherlands	Sweden	115461
Netherlands	Switzerland	60222
Netherlands	Thailand	86386.7
Netherlands	United Kingdom	4329.36
Netherlands	USA	3.80918e+06
New Zealand	Australia	2.06412e+06
New Zealand	Australia	94944.3
New Zealand	China, Hong Kong SAR	1022.17
New Zealand	Cook Isds	9148.62
New Zealand	Fiji	21869.5
New Zealand	Thailand	240363
New Zealand	United Kingdom	1231.53
New Zealand	USA	8149.44
New Zealand	USA	8229.9
Nicaragua	USA	7059
North Macedonia	Montenegro	17491
Norway	Denmark	17995
Norway	Estonia	5162
Norway	Finland	73256
Norway	Germany	21940944
Norway	Japan	43776659
Norway	Sweden	1108934
Norway	Sweden	2330
Norway	United Arab Emirates	70751
Norway	United Kingdom	120146870
Norway	United Kingdom	316
Norway	USA	115513279
Other Asia, nes	Australia	9774
Other Asia, nes	Australia	2250
Other Asia, nes	Canada	336
Other Asia, nes	China	6848707
Other Asia, nes	China	7692
Other Asia, nes	China, Hong Kong SAR	14520855
Other Asia, nes	China, Hong Kong SAR	326743
Other Asia, nes	France	4602
Other Asia, nes	Germany	36470313
Other Asia, nes	India	9136
Other Asia, nes	Iran	662454
Other Asia, nes	Italy	3627
Other Asia, nes	Japan	81225551
Other Asia, nes	Japan	61197
Other Asia, nes	Malaysia	40155544
Other Asia, nes	Netherlands	940
Other Asia, nes	New Zealand	773
Other Asia, nes	Saudi Arabia	3527
Other Asia, nes	Singapore	84034071
Other Asia, nes	Spain	4165
Other Asia, nes	Switzerland	3250838
Other Asia, nes	United Kingdom	4265395
Other Asia, nes	USA	14609292
Other Asia, nes	USA	19783
Other Asia, nes	Viet Nam	1075
Peru	Spain	1471.18
Peru	Switzerland	311700
Philippines	Australia	1283
Philippines	China, Hong Kong SAR	55350
Philippines	Costa Rica	389
Philippines	Japan	108506
Philippines	Other Asia, nes	4967
Philippines	United Kingdom	2087
Philippines	USA	32218
Poland	Areas, nes	6438
Poland	Australia	82
Poland	Austria	1284
Poland	Austria	2
Poland	Belgium	18586
Poland	Belgium	5
Poland	Bunkers	19117
Poland	Canada	102
Poland	China	1244
Poland	China, Hong Kong SAR	1228
Poland	Czechia	390148
Poland	Czechia	683
Poland	Denmark	2226
Poland	Estonia	105
Poland	Finland	20
Poland	France	115443
Poland	Germany	5174556
Poland	Germany	5349
Poland	Greece	1
Poland	Hungary	5820
Poland	Italy	2400199
Poland	Italy	410
Poland	Lithuania	710
Poland	Netherlands	2219054
Poland	Netherlands	64
Poland	Norway	2297
Poland	Portugal	3
Poland	Romania	8554
Poland	Romania	2572
Poland	Saudi Arabia	1617
Poland	Slovakia	3
Poland	Slovenia	2
Poland	Spain	205
Poland	Sweden	136
Poland	Ukraine	514
Poland	United Kingdom	13271594
Poland	United Kingdom	122
Poland	USA	923
Poland	USA	986
Portugal	Belgium	231798
Portugal	Germany	174364
Portugal	Italy	125407
Portugal	Spain	118737
Portugal	Spain	9739
Portugal	United Arab Emirates	2167
Portugal	USA	28594
Rep. of Korea	China	244496
Rep. of Korea	China	4884
Rep. of Korea	China, Hong Kong SAR	2908668
Rep. of Korea	China, Hong Kong SAR	36693
Rep. of Korea	Germany	26947325
Rep. of Korea	Japan	117433975
Rep. of Korea	Japan	178771
Rep. of Korea	Malaysia	519041
Rep. of Korea	Mongolia	280
Rep. of Korea	Other Asia, nes	1324110
Rep. of Korea	Spain	83
Rep. of Korea	Thailand	31676
Rep. of Korea	Türkiye	938
Rep. of Korea	Türkiye	160
Rep. of Korea	United Kingdom	26549931
Rep. of Korea	United Kingdom	12567
Rep. of Korea	USA	9153550
Rep. of Korea	USA	4789
Rep. of Korea	Viet Nam	77435
Rep. of Moldova	Germany	935
Russian Federation	Australia	110
Russian Federation	Belarus	19765766
Russian Federation	Belarus	3680
Russian Federation	China	66812
Russian Federation	China, Hong Kong SAR	22539826
Russian Federation	Czechia	520
Russian Federation	France	49
Russian Federation	Germany	220186260
Russian Federation	India	904
Russian Federation	Italy	9234
Russian Federation	Japan	406331636
Russian Federation	Kazakhstan	28291
Russian Federation	Kazakhstan	4895
Russian Federation	Latvia	29078
Russian Federation	Poland	5416
Russian Federation	Rep. of Moldova	12584
Russian Federation	Spain	41400
Russian Federation	Switzerland	3483002
Russian Federation	Ukraine	749195
Russian Federation	United Kingdom	116111692
Russian Federation	USA	255788043
Rwanda	Kenya	6121.89
Saint Lucia	USA	33575
Saudi Arabia	France	1889069
Serbia	Switzerland	775586
Singapore	Australia	4084.99
Singapore	Australia	102632
Singapore	Belgium	355277
Singapore	China	714183
Singapore	China	3274.7
Singapore	China, Hong Kong SAR	2.17739e+06
Singapore	China, Hong Kong SAR	381699
Singapore	Denmark	8002.17
Singapore	France	24629
Singapore	Germany	2.84969e+07
Singapore	Germany	3655.87
Singapore	Greece	411.535
Singapore	Indonesia	141251
Singapore	Indonesia	98778.1
Singapore	Japan	5.88018e+07
Singapore	Japan	263546
Singapore	Jordan	450216
Singapore	Malaysia	1.46796e+07
Singapore	Malaysia	365981
Singapore	Morocco	71246.8
Singapore	New Zealand	23.973
Singapore	Other Asia, nes	6.15176e+06
Singapore	Philippines	78143
Singapore	Philippines	489.847
Singapore	Rep. of Korea	4521.3
Singapore	Rep. of Korea	1908.25
Singapore	Spain	5284.43
Singapore	Switzerland	791499
Singapore	Switzerland	58633.8
Singapore	Thailand	98870.8
Singapore	Thailand	25361
Singapore	Türkiye	4430.2
Singapore	United Kingdom	3.37311e+06
Singapore	USA	2.85362e+07
Singapore	USA	121914
Singapore	Viet Nam	411738
Slovakia	Austria	445216
Slovakia	Czechia	9.97248e+07
Slovakia	Czechia	847.339
Slovakia	Germany	1911.16
Slovakia	Serbia	168.671
Slovenia	Austria	272872
Slovenia	Austria	4233
Slovenia	Bosnia Herzegovina	16689
Slovenia	Bulgaria	858
Slovenia	Bulgaria	211
Slovenia	Croatia	44828
Slovenia	Croatia	46667
Slovenia	Cyprus	33838
Slovenia	Czechia	4091063
Slovenia	Germany	8918
Slovenia	Italy	28490
Slovenia	Montenegro	3008
Slovenia	North Macedonia	348
Slovenia	Pakistan	2830
Slovenia	Poland	995215
Slovenia	Serbia	35720
Slovenia	Serbia	21294
South Africa	Australia	1059.55
South Africa	Botswana	2472.28
South Africa	Botswana	4923.95
South Africa	China	3.29993e+08
South Africa	China, Hong Kong SAR	6.54685e+08
South Africa	Congo	6514.41
South Africa	Eswatini	141.066
South Africa	Eswatini	122.837
South Africa	France	1758.04
South Africa	Germany	5.35763e+08
South Africa	India	2.12217e+07
South Africa	Italy	1.86034e+07
South Africa	Japan	2.5743e+09
South Africa	Lesotho	2233.65
South Africa	Malawi	1450.02
South Africa	Namibia	1020.4
South Africa	Namibia	24158.3
South Africa	Netherlands	26216.8
South Africa	Panama	2.46333e+07
South Africa	Papua New Guinea	1.37478e+07
South Africa	Rep. of Korea	2.95179e+07
South Africa	Switzerland	1.64289e+09
South Africa	United Arab Emirates	26022.4
South Africa	United Kingdom	1.23895e+09
South Africa	USA	1.33196e+09
South Africa	Zambia	1071.87
South Africa	Zimbabwe	30711.4
South Africa	Zimbabwe	159.398
Spain	Andorra	3063.09
Spain	Andorra	34217
Spain	Areas, nes	5494.31
Spain	Argentina	862.917
Spain	Australia	5311.07
Spain	Australia	17531
Spain	Belgium	1.63642e+06
Spain	Chile	7069.32
Spain	Croatia	1278.73
Spain	Cyprus	403.11
Spain	Czechia	229.704
Spain	Dominican Rep.	4944.87
Spain	France	9.52651e+06
Spain	France	7950.95
Spain	Germany	1.35001e+06
Spain	Gibraltar	4746.43
Spain	Greece	17222.2
Spain	Hungary	842734
Spain	Israel	663.884
Spain	Italy	1.7914e+07
Spain	Italy	18457.3
Spain	Japan	265.262
Spain	Kuwait	292.175
Spain	Latvia	169.091
Spain	Latvia	898.235
Spain	Lebanon	2536.7
Spain	Mauritius	156.013
Spain	Mexico	143060
Spain	Morocco	329.34
Spain	Panama	956.232
Spain	Poland	27394.1
Spain	Portugal	145162
Spain	Portugal	139947
Spain	Romania	381.069
Spain	Sweden	15244.3
Spain	Switzerland	2.58415e+06
Spain	Tunisia	374.431
Spain	United Arab Emirates	523.141
Spain	United Kingdom	3.43985e+07
Spain	United Kingdom	17777.7
Spain	USA	38291
Spain	Venezuela	2077.82
Sri Lanka	France	1074
Sri Lanka	Japan	42613
Sri Lanka	United Kingdom	2735
Suriname	USA	15643
Sweden	Austria	1996.21
Sweden	Belgium	460.663
Sweden	Canada	60807.5
Sweden	China, Hong Kong SAR	153.554
Sweden	Cyprus	153.554
Sweden	Denmark	51133.6
Sweden	Denmark	209295
Sweden	Estonia	1842.65
Sweden	Finland	526538
Sweden	Finland	254439
Sweden	France	767.772
Sweden	Germany	97814.1
Sweden	Germany	24875.8
Sweden	India	6756.39
Sweden	Iraq	1535.54
Sweden	Italy	153.554
Sweden	Japan	2917.53
Sweden	Latvia	1074.88
Sweden	Malaysia	21804.7
Sweden	Netherlands	614.217
Sweden	Norway	41613.2
Sweden	Norway	649688
Sweden	Poland	38849.2
Sweden	Romania	921.326
Sweden	Singapore	307.109
Sweden	Slovakia	15355.4
Sweden	Switzerland	90904.2
Sweden	Switzerland	3838.86
Sweden	United Kingdom	1.54384e+06
Sweden	USA	14587.7
Sweden	USA	1074.88
Switzerland	Algeria	4590.52
Switzerland	Aruba	7118.27
Switzerland	Australia	589644
Switzerland	Australia	10357
Switzerland	Austria	1.6952e+06
Switzerland	Bahrain	101753
Switzerland	Belgium	2.15735e+06
Switzerland	Belgium	3.237
Switzerland	Brazil	3313.16
Switzerland	Canada	3.92758e+06
Switzerland	Chile	13617.3
Switzerland	Chile	9459.39
Switzerland	China	5.65039e+08
Switzerland	China, Hong Kong SAR	1.07994e+09
Switzerland	China, Hong Kong SAR	3.62702e+06
Switzerland	Costa Rica	178785
Switzerland	Czechia	345210
Switzerland	Denmark	1.15303e+06
Switzerland	Finland	521240
Switzerland	France	2.13211e+07
Switzerland	France	465540
Switzerland	French Polynesia	267.556
Switzerland	Germany	3.20599e+08
Switzerland	Germany	577984
Switzerland	Greece	48148.2
Switzerland	Hungary	32525.3
Switzerland	India	164501
Switzerland	Ireland	9493.91
Switzerland	Israel	678527
Switzerland	Italy	9.04846e+07
Switzerland	Italy	2.78833e+06
Switzerland	Japan	8.63161e+07
Switzerland	Japan	3268.93
Switzerland	Kuwait	8812.08
Switzerland	Lebanon	186946
Switzerland	Luxembourg	1.02457e+06
Switzerland	Malaysia	2.54654e+06
Switzerland	Mauritius	6634.95
Switzerland	Netherlands	1.6715e+06
Switzerland	Norway	102760
Switzerland	Oman	304.237
Switzerland	Other Asia, nes	9592.09
Switzerland	Pakistan	120.832
Switzerland	Panama	6111.7
Switzerland	Paraguay	9506.86
Switzerland	Philippines	2165.26
Switzerland	Poland	6038.34
Switzerland	Portugal	626.814
Switzerland	Qatar	1.82642e+07
Switzerland	Rep. of Korea	5.058e+06
Switzerland	Russian Federation	9273.82
Switzerland	Saudi Arabia	80526.7
Switzerland	Singapore	766399
Switzerland	Slovakia	45528.7
Switzerland	South Africa	1.34558e+06
Switzerland	Spain	1.38007e+06
Switzerland	Spain	10831.7
Switzerland	Sweden	936611
Switzerland	Thailand	287379
Switzerland	Türkiye	24134
Switzerland	Ukraine	171964
Switzerland	Ukraine	4854.84
Switzerland	United Arab Emirates	6.98693e+07
Switzerland	United Arab Emirates	3.38319e+06
Switzerland	United Kingdom	1.43732e+09
Switzerland	United Kingdom	1.94112e+06
Switzerland	USA	1.28572e+07
Switzerland	USA	1.06483e+06
Switzerland	Viet Nam	2210.57
Thailand	Australia	9966
Thailand	Australia	1650118
Thailand	Austria	399550
Thailand	Austria	666
Thailand	Bosnia Herzegovina	68
Thailand	Brazil	342
Thailand	Brunei Darussalam	718
Thailand	Cambodia	536
Thailand	Cambodia	10
Thailand	Canada	43
Thailand	Chile	3
Thailand	China	33
Thailand	China	107
Thailand	China, Hong Kong SAR	125433
Thailand	China, Hong Kong SAR	600321
Thailand	Denmark	1681
Thailand	France	337
Thailand	France	1002
Thailand	Germany	27658
Thailand	India	44999
Thailand	Indonesia	11
Thailand	Indonesia	30099
Thailand	Japan	973300
Thailand	Japan	94401
Thailand	Malaysia	12077
Thailand	Malaysia	61024
Thailand	Myanmar	9000
Thailand	N. Mariana Isds	1768
Thailand	Netherlands	1
Thailand	New Zealand	20
Thailand	Other Asia, nes	31426
Thailand	Panama	4282
Thailand	Philippines	483
Thailand	Rep. of Korea	9
Thailand	Singapore	16897
Thailand	Singapore	55878
Thailand	Spain	104
Thailand	Sweden	9060
Thailand	Sweden	227
Thailand	Switzerland	513364
Thailand	Switzerland	35
Thailand	United Arab Emirates	13737
Thailand	United Arab Emirates	938000
Thailand	United Kingdom	316200
Thailand	United Kingdom	5065
Thailand	USA	114126
Thailand	USA	69204
Thailand	Viet Nam	11154
Thailand	Viet Nam	386
Türkiye	Australia	2033
Türkiye	Austria	432
Türkiye	Bulgaria	222
Türkiye	Cyprus	749
Türkiye	Greece	295
Türkiye	Iraq	1853
Türkiye	Israel	154
Türkiye	North Macedonia	6021
Türkiye	Norway	550
Türkiye	Russian Federation	13665
Türkiye	Saudi Arabia	18325
Türkiye	Serbia	1147
Türkiye	Tajikistan	433
Türkiye	United Kingdom	5708021
Türkiye	United Rep. of Tanzania	10513
Türkiye	USA	234831
Türkiye	USA	3000
Ukraine	Areas, nes	2186
Ukraine	Germany	370569
Ukraine	Russian Federation	350913
Ukraine	United Kingdom	268270
United Arab Emirates	Bahrain	5424.1
United Arab Emirates	Belgium	3.42961e+06
United Arab Emirates	China, Hong Kong SAR	603.349
United Arab Emirates	China, Hong Kong SAR	1.1137e+06
United Arab Emirates	France	126768
United Arab Emirates	India	236928
United Arab Emirates	India	170840
United Arab Emirates	Jordan	1150.17
United Arab Emirates	Lebanon	7678.15
United Arab Emirates	Netherlands	176161
United Arab Emirates	Oman	108.918
United Arab Emirates	Oman	1538.46
United Arab Emirates	Qatar	144916
United Arab Emirates	Qatar	171.227
United Arab Emirates	Switzerland	419862
United Arab Emirates	Switzerland	220243
United Arab Emirates	Türkiye	21072
United Arab Emirates	United Kingdom	3.5314e+06
United Arab Emirates	Yemen	257291
United Kingdom	Argentina	58750808
United Kingdom	Australia	89101706
United Kingdom	Australia	11530
United Kingdom	Austria	15919511
United Kingdom	Austria	5449
United Kingdom	Bahrain	36666
United Kingdom	Belgium	16704020
United Kingdom	Belgium	1100
United Kingdom	Bosnia Herzegovina	2404
United Kingdom	Brazil	1351959
United Kingdom	Brazil	1800
United Kingdom	Bulgaria	2978
United Kingdom	Bulgaria	24864
United Kingdom	Canada	1405566
United Kingdom	China	193645070
United Kingdom	China, Hong Kong SAR	657596334
United Kingdom	China, Hong Kong SAR	1170389
United Kingdom	Colombia	9645
United Kingdom	Croatia	227
United Kingdom	Cyprus	8164
United Kingdom	Cyprus	425
United Kingdom	Czechia	11240187
United Kingdom	Czechia	111022
United Kingdom	Denmark	1581887
United Kingdom	Denmark	30644
United Kingdom	Egypt	49231
United Kingdom	Estonia	6965331
United Kingdom	Finland	1153220
United Kingdom	Finland	27033
United Kingdom	France	25994126
United Kingdom	France	493749
United Kingdom	Georgia	959408
United Kingdom	Germany	825406498
United Kingdom	Germany	201436
United Kingdom	Ghana	3669
United Kingdom	Gibraltar	16383
United Kingdom	Greece	13668
United Kingdom	Greece	4041
United Kingdom	Hungary	40933
United Kingdom	Hungary	15431
United Kingdom	India	98839458
United Kingdom	India	9452
United Kingdom	Ireland	35283504
United Kingdom	Ireland	240733
United Kingdom	Israel	900280
United Kingdom	Italy	45702334
United Kingdom	Italy	74278
United Kingdom	Japan	197271478
United Kingdom	Japan	358574
United Kingdom	Kenya	51620
United Kingdom	Latvia	1683
United Kingdom	Latvia	2732
United Kingdom	Lithuania	913405
United Kingdom	Lithuania	200
United Kingdom	Luxembourg	198629
United Kingdom	Luxembourg	782
United Kingdom	Malaysia	72811
United Kingdom	Malaysia	12461
United Kingdom	Malta	4325
United Kingdom	Mexico	678540
United Kingdom	Mexico	7501
United Kingdom	Nepal	1758
United Kingdom	Netherlands	1245641
United Kingdom	Netherlands	68307
United Kingdom	New Zealand	9181
United Kingdom	Nigeria	2604
United Kingdom	North Macedonia	463862193
United Kingdom	Norway	5238206
United Kingdom	Norway	1556
United Kingdom	Other Asia, nes	23612839
United Kingdom	Philippines	2338
United Kingdom	Poland	15945987
United Kingdom	Poland	5657
United Kingdom	Portugal	474667
United Kingdom	Portugal	2013
United Kingdom	Qatar	50985
United Kingdom	Rep. of Korea	74952525
United Kingdom	Romania	4351000
United Kingdom	Russian Federation	20043
United Kingdom	Saudi Arabia	7748
United Kingdom	Singapore	595949
United Kingdom	Singapore	1592
United Kingdom	Slovakia	74878010
United Kingdom	Slovakia	8436
United Kingdom	Slovenia	103854
United Kingdom	South Africa	1764669
United Kingdom	South Africa	3683
United Kingdom	Spain	38811555
United Kingdom	Spain	514704
United Kingdom	Sweden	1260496
United Kingdom	Sweden	416
United Kingdom	Switzerland	169893313
United Kingdom	Switzerland	227955
United Kingdom	Thailand	481150
United Kingdom	Thailand	291913
United Kingdom	Türkiye	3445640
United Kingdom	Türkiye	96401
United Kingdom	Ukraine	717967
United Kingdom	Ukraine	13157
United Kingdom	United Arab Emirates	7648264
United Kingdom	United Arab Emirates	64354
United Kingdom	USA	485907158
United Kingdom	USA	419913
United Rep. of Tanzania	Dem. Rep. of the Congo	134660
United Rep. of Tanzania	Japan	13
United Rep. of Tanzania	Netherlands	9
USA	Argentina	7090291
USA	Aruba	16264
USA	Australia	15264134
USA	Australia	285985
USA	Austria	513746
USA	Bahamas	38717
USA	Barbados	17345
USA	Belarus	610796
USA	Belgium	401258
USA	Bermuda	161184
USA	Bolivia (Plurinational State of)	6511
USA	Br. Virgin Isds	3200
USA	Brazil	74746239
USA	Cambodia	47994
USA	Canada	254588670
USA	Canada	3726581
USA	Cayman Isds	4459
USA	Cayman Isds	20356
USA	Chile	3733310
USA	China	190004753
USA	China, Hong Kong SAR	27440853
USA	China, Hong Kong SAR	3712960
USA	Colombia	957913
USA	Costa Rica	832751
USA	Curaçao	4970
USA	Cyprus	4104
USA	Czechia	194262
USA	Denmark	1620238
USA	Dominican Rep.	345413
USA	Eswatini	4300
USA	Finland	20448
USA	France	6265721
USA	France	204485
USA	Germany	240062297
USA	Germany	89250
USA	Greece	18219
USA	Guatemala	12600
USA	Iceland	11692
USA	India	13754775
USA	India	3850
USA	Iraq	8329
USA	Ireland	11306200
USA	Israel	12507614
USA	Israel	55093
USA	Italy	191461302
USA	Jamaica	6762
USA	Japan	316464444
USA	Japan	5557720
USA	Jordan	5940
USA	Kazakhstan	5000
USA	Kuwait	65412
USA	Lao People's Dem. Rep.	1975088
USA	Lebanon	238753
USA	Lithuania	11062
USA	Malaysia	188782
USA	Malta	3824
USA	Mexico	16511074
USA	Mexico	80718
USA	Netherlands	517400
USA	Netherlands	456404
USA	New Zealand	1442960
USA	Norway	636797
USA	Norway	7908
USA	Other Asia, nes	20111884
USA	Other Asia, nes	16150
USA	Panama	240115
USA	Panama	5514
USA	Peru	218334
USA	Philippines	204987
USA	Poland	107301
USA	Portugal	4955
USA	Qatar	54705
USA	Qatar	7400
USA	Rep. of Korea	395580324
USA	Rep. of Korea	50879
USA	Romania	63049
USA	Russian Federation	36932
USA	Saint Lucia	3925
USA	Saudi Arabia	790942
USA	Saudi Arabia	3294
USA	Singapore	31742407
USA	Singapore	23932
USA	Sint Maarten	1065199
USA	South Africa	75611
USA	Spain	578470
USA	Sweden	294640
USA	Sweden	16260
USA	Switzerland	64367603
USA	Switzerland	127519
USA	Thailand	4266106
USA	Thailand	297696
USA	Trinidad and Tobago	13766
USA	Türkiye	25311
USA	United Arab Emirates	591920
USA	United Arab Emirates	22489
USA	United Kingdom	180709700
USA	United Kingdom	849358
USA	Uruguay	76899
USA	Venezuela	3000
USA	Viet Nam	354552
Viet Nam	Australia	13702
Viet Nam	China, Hong Kong SAR	210656
Viet Nam	Italy	227140
Viet Nam	Japan	66439
Viet Nam	Japan	1160129
Viet Nam	USA	12000
Zambia	Pakistan	208.587
Zambia	Switzerland	377.788
Zimbabwe	South Africa	1.40163e+08

## Sheet: 2014
source	target	weight
Andorra	France	814.097
Andorra	Morocco	49.124
Andorra	Spain	2577.33
Andorra	Switzerland	169.944
Argentina	Germany	36779.7
Australia	Austria	5905
Australia	Bunkers	54044
Australia	Burkina Faso	26798
Australia	Canada	9196
Australia	China	1650
Australia	China	27064
Australia	China, Hong Kong SAR	8923
Australia	China, Hong Kong SAR	404115
Australia	Fiji	3690
Australia	Fiji	231611
Australia	France	4023
Australia	Germany	12522
Australia	Indonesia	85508
Australia	Lithuania	3281
Australia	New Caledonia	292517
Australia	New Zealand	207167
Australia	New Zealand	468496
Australia	Papua New Guinea	918
Australia	Papua New Guinea	156219
Australia	Rep. of Korea	15746
Australia	Seychelles	23584
Australia	Singapore	13476
Australia	Singapore	129339
Australia	Switzerland	9969
Australia	Thailand	582394
Australia	Timor-Leste	330784
Australia	Ukraine	37947
Australia	United Arab Emirates	8923
Australia	United Arab Emirates	975659
Australia	United Kingdom	2086693
Australia	United Kingdom	21018
Australia	USA	46519
Australia	USA	1241964
Australia	Vanuatu	158867
Australia	Viet Nam	28457
Austria	Argentina	125184
Austria	Australia	214011
Austria	Australia	1111
Austria	Belgium	2640142
Austria	Belgium	15142
Austria	Brazil	3939
Austria	Bulgaria	16060
Austria	Canada	3293
Austria	Chile	29576
Austria	China	41261
Austria	China	898
Austria	China, Hong Kong SAR	17496
Austria	Colombia	100
Austria	Croatia	810
Austria	Croatia	963
Austria	Czechia	1698879
Austria	Czechia	15
Austria	Denmark	57985
Austria	Egypt	167785
Austria	Finland	290
Austria	France	345184
Austria	France	8597
Austria	Germany	96982217
Austria	Germany	88026
Austria	Greece	105583
Austria	Hungary	75761
Austria	Hungary	5117
Austria	Indonesia	10167
Austria	Italy	1756573
Austria	Italy	9734
Austria	Japan	13367
Austria	Luxembourg	140747
Austria	Malta	88288
Austria	Netherlands	3645133
Austria	New Zealand	10195
Austria	North Macedonia	76
Austria	Poland	55492
Austria	Portugal	55869
Austria	Rep. of Korea	3448
Austria	Romania	8009
Austria	Romania	5360
Austria	Russian Federation	60
Austria	Saudi Arabia	1255
Austria	Serbia	1355
Austria	Singapore	4276
Austria	Slovakia	130482
Austria	Slovakia	36764
Austria	Slovenia	849641
Austria	Slovenia	11858
Austria	Spain	9692
Austria	Spain	2395
Austria	Sweden	1262512
Austria	Switzerland	115647
Austria	Switzerland	15393
Austria	Türkiye	727003
Austria	United Arab Emirates	1261
Austria	United Arab Emirates	887
Austria	United Kingdom	8027036
Austria	United Kingdom	8786
Austria	USA	725115
Austria	USA	3520
Bahrain	Saudi Arabia	21858
Bahrain	United Arab Emirates	46
Barbados	United Kingdom	5
Barbados	USA	83215
Belgium	Angola	2969.25
Belgium	Australia	3582.01
Belgium	Austria	125.515
Belgium	Austria	135.403
Belgium	Benin	3143.89
Belgium	Brazil	6.10386e+06
Belgium	Bulgaria	4510.26
Belgium	China	1.64866e+07
Belgium	China, Hong Kong SAR	226.084
Belgium	China, Hong Kong SAR	500.413
Belgium	Czechia	35.579
Belgium	Denmark	652.975
Belgium	Egypt	276.043
Belgium	France	4.52479e+06
Belgium	France	2.313
Belgium	Germany	2.73723e+08
Belgium	Germany	1675.76
Belgium	Greece	0.066
Belgium	Ireland	113585
Belgium	Italy	4.8836e+06
Belgium	Japan	3387.08
Belgium	Kenya	5977.65
Belgium	Lebanon	58.438
Belgium	Luxembourg	4545.97
Belgium	Netherlands	1.31244e+06
Belgium	Netherlands	364.079
Belgium	Poland	50777
Belgium	Russian Federation	65131.7
Belgium	Saudi Arabia	38.888
Belgium	Saudi Arabia	432.725
Belgium	Serbia	82907.7
Belgium	Slovakia	769.957
Belgium	Slovenia	222.921
Belgium	South Africa	286.782
Belgium	Spain	1872.71
Belgium	Sudan	3179.08
Belgium	Sweden	96.648
Belgium	Switzerland	1.19461e+06
Belgium	Switzerland	1.00346e+06
Belgium	Türkiye	171.46
Belgium	Türkiye	232.583
Belgium	Uganda	16014.2
Belgium	United Arab Emirates	13718.5
Belgium	United Arab Emirates	468.782
Belgium	United Kingdom	2.79524e+07
Belgium	USA	5.65071e+07
Benin	Ghana	168622
Bosnia Herzegovina	Germany	11582
Brazil	Canada	3205
Brazil	Chile	1466
Brazil	Colombia	2580
Brazil	Equatorial Guinea	78
Brazil	France	339
Brazil	Germany	3613245
Brazil	Guatemala	1672
Brazil	Uruguay	2805
Brazil	USA	1977239
Brazil	USA	300
Bulgaria	Areas, nes	582
Bulgaria	Austria	1465
Bulgaria	Germany	48915
Bulgaria	Greece	7330113
Bulgaria	Italy	85742
Bulgaria	North Macedonia	843
Bulgaria	United Kingdom	193869
Canada	Australia	18270
Canada	Australia	4066
Canada	Austria	1559
Canada	Bahamas	1045
Canada	China	13595441
Canada	China	21900
Canada	China, Hong Kong SAR	369477
Canada	Finland	8019587
Canada	France	130
Canada	Germany	16220690
Canada	Israel	5875
Canada	Israel	32149
Canada	Japan	670599
Canada	Japan	19504
Canada	Mexico	788545
Canada	Netherlands	27915099
Canada	Rep. of Korea	8836490
Canada	Singapore	12416
Canada	Switzerland	656911
Canada	Switzerland	57551
Canada	Thailand	3439
Canada	Trinidad and Tobago	523
Canada	United Kingdom	65403614
Canada	United Kingdom	2968
Canada	USA	114013813
Canada	USA	784984
China	Algeria	21758
China	Aruba	20900
China	Australia	273344
China	Austria	19219
China	Azerbaijan	90
China	Bahamas	5120
China	Belarus	31
China	Belgium	15189
China	Brazil	24841
China	Bulgaria	5200
China	Cambodia	27
China	Canada	70924
China	Chile	4
China	China, Hong Kong SAR	12432
China	China, Hong Kong SAR	17177291
China	Colombia	980
China	Curaçao	2750
China	Czechia	21962
China	Denmark	111146
China	Egypt	59980
China	El Salvador	360
China	Eswatini	200
China	Fiji	1229
China	Finland	195327
China	France	130560
China	Germany	1408027
China	Germany	1168059
China	Guatemala	852
China	Honduras	3286
China	India	322884
China	Indonesia	3720
China	Iran	44248
China	Ireland	945
China	Israel	22470
China	Italy	155485
China	Japan	49911800
China	Japan	1311388
China	Jordan	405600
China	Kenya	3420
China	Latvia	58867
China	Lithuania	8175
China	Luxembourg	22095
China	Malaysia	15284
China	Maldives	1187
China	Mexico	299955
China	Netherlands	69984
China	New Zealand	39529
China	Norway	39628
China	Other Asia, nes	286556
China	Other Asia, nes	51163
China	Pakistan	302
China	Panama	3000
China	Peru	3434
China	Philippines	19940
China	Poland	197209
China	Portugal	2933
China	Qatar	16056
China	Rep. of Korea	1830
China	Rep. of Korea	716689
China	Romania	17556
China	Russian Federation	6725828
China	San Marino	219
China	Saudi Arabia	51314
China	Singapore	1251
China	Slovenia	3294
China	South Africa	806
China	Spain	51109
China	Sudan	5599
China	Sweden	142966
China	Switzerland	4361149
China	Thailand	38834
China	Türkiye	4370
China	Ukraine	4926
China	United Arab Emirates	20025
China	United Kingdom	683686
China	Uruguay	11795
China	USA	16385636
China	USA	5733869
China	Viet Nam	6320
China, Hong Kong SAR	Australia	2373911
China, Hong Kong SAR	Australia	402912
China, Hong Kong SAR	Austria	99329
China, Hong Kong SAR	Canada	167734
China, Hong Kong SAR	China	770511504
China, Hong Kong SAR	China	1868129
China, Hong Kong SAR	China, Macao SAR	550223
China, Hong Kong SAR	Cyprus	15197
China, Hong Kong SAR	Denmark	73366
China, Hong Kong SAR	Egypt	3495
China, Hong Kong SAR	El Salvador	3749
China, Hong Kong SAR	Estonia	1757
China, Hong Kong SAR	Fiji	202101
China, Hong Kong SAR	Finland	25498
China, Hong Kong SAR	France	2182655
China, Hong Kong SAR	Germany	9981120
China, Hong Kong SAR	Germany	2076907
China, Hong Kong SAR	Gibraltar	8417
China, Hong Kong SAR	Greece	9494
China, Hong Kong SAR	Hungary	13213
China, Hong Kong SAR	India	890312
China, Hong Kong SAR	India	8736
China, Hong Kong SAR	Indonesia	25505
China, Hong Kong SAR	Indonesia	1809
China, Hong Kong SAR	Ireland	840
China, Hong Kong SAR	Israel	21125
China, Hong Kong SAR	Italy	439987
China, Hong Kong SAR	Japan	1134534
China, Hong Kong SAR	Japan	810069
China, Hong Kong SAR	LAIA, nes	8885
China, Hong Kong SAR	Luxembourg	1750
China, Hong Kong SAR	Malaysia	188976
China, Hong Kong SAR	Mexico	296429
China, Hong Kong SAR	Mongolia	189
China, Hong Kong SAR	Netherlands	91476
China, Hong Kong SAR	New Zealand	55537
China, Hong Kong SAR	Norway	26554
China, Hong Kong SAR	Oceania, nes	13757
China, Hong Kong SAR	Other Asia, nes	51388599
China, Hong Kong SAR	Other Asia, nes	1858626
China, Hong Kong SAR	Philippines	168
China, Hong Kong SAR	Poland	429359
China, Hong Kong SAR	Portugal	14807
China, Hong Kong SAR	Qatar	51302
China, Hong Kong SAR	Rep. of Korea	56011
China, Hong Kong SAR	Russian Federation	341690
China, Hong Kong SAR	Saudi Arabia	13146
China, Hong Kong SAR	Singapore	2629040
China, Hong Kong SAR	Singapore	997703
China, Hong Kong SAR	Slovakia	22961
China, Hong Kong SAR	South Africa	22480
China, Hong Kong SAR	Spain	631718
China, Hong Kong SAR	Sri Lanka	591893
China, Hong Kong SAR	Sweden	276673
China, Hong Kong SAR	Switzerland	2109119
China, Hong Kong SAR	Switzerland	2547986
China, Hong Kong SAR	Thailand	2069471
China, Hong Kong SAR	Thailand	230445
China, Hong Kong SAR	Türkiye	12896
China, Hong Kong SAR	United Arab Emirates	11625553
China, Hong Kong SAR	United Kingdom	2048376
China, Hong Kong SAR	USA	108046
China, Hong Kong SAR	USA	13072984
China, Hong Kong SAR	Viet Nam	312078
Colombia	Canada	1526
Colombia	China, Hong Kong SAR	5104
Colombia	Dominican Rep.	1
Colombia	Spain	67
Colombia	Switzerland	18358043
Colombia	Türkiye	639210
Colombia	United Kingdom	10000
Colombia	USA	52468879
Costa Rica	Nicaragua	25
Costa Rica	Spain	188
Costa Rica	USA	65840
Costa Rica	USA	41804
Côte d'Ivoire	France	191.621
Côte d'Ivoire	South Africa	405.178
Côte d'Ivoire	Switzerland	284.01
Côte d'Ivoire	USA	184.606
Croatia	Areas, nes	300
Croatia	Bosnia Herzegovina	1610
Croatia	Germany	2331642
Croatia	Italy	90729
Cyprus	Canada	3246.86
Cyprus	United Kingdom	2436.47
Czechia	Austria	1665661
Czechia	Belgium	716768
Czechia	Bosnia Herzegovina	6830
Czechia	Canada	151003
Czechia	Denmark	37324
Czechia	Egypt	49080
Czechia	France	1169470
Czechia	Germany	96509232
Czechia	Germany	3289
Czechia	Greece	7128
Czechia	Hungary	6556072
Czechia	Hungary	49
Czechia	India	461502
Czechia	Israel	81941
Czechia	Italy	966298
Czechia	Luxembourg	19322
Czechia	Montenegro	797
Czechia	Netherlands	33846
Czechia	Other Asia, nes	33269
Czechia	Poland	39623682
Czechia	Poland	878
Czechia	Rep. of Korea	19829
Czechia	Romania	75105
Czechia	Serbia	1146
Czechia	Singapore	4141
Czechia	Slovakia	10544423
Czechia	Slovakia	198496
Czechia	Slovenia	5493
Czechia	Spain	112210
Czechia	Sweden	2996
Czechia	Switzerland	11321090
Czechia	Thailand	6249
Czechia	Ukraine	277059
Czechia	United Kingdom	1371328
Czechia	USA	4274477
Denmark	Algeria	804
Denmark	Armenia	86
Denmark	Australia	284
Denmark	Austria	1372
Denmark	Azerbaijan	3850
Denmark	Belarus	2345
Denmark	Belgium	6
Denmark	Bosnia Herzegovina	485
Denmark	Brazil	2581
Denmark	Bulgaria	17
Denmark	Burundi	35
Denmark	Cameroon	279
Denmark	Canada	830
Denmark	China	1790
Denmark	China, Hong Kong SAR	243
Denmark	Cuba	108
Denmark	Czechia	786
Denmark	Ecuador	60
Denmark	Egypt	321
Denmark	Estonia	39
Denmark	Eswatini	192
Denmark	Ethiopia	442
Denmark	Faeroe Isds	36
Denmark	Finland	11883
Denmark	France	521
Denmark	Georgia	411
Denmark	Germany	14579
Denmark	Germany	38489
Denmark	Greece	27
Denmark	Greenland	26
Denmark	Hungary	126
Denmark	Iceland	989
Denmark	Indonesia	237
Denmark	Iran	485
Denmark	Ireland	47
Denmark	Italy	44995
Denmark	Japan	5092
Denmark	Kazakhstan	1879
Denmark	Kenya	522
Denmark	Kyrgyzstan	1013
Denmark	Lebanon	192
Denmark	Lithuania	33651
Denmark	Mali	934
Denmark	Mauritania	2016
Denmark	Mongolia	2154
Denmark	Morocco	1768
Denmark	Netherlands	16420
Denmark	Norway	19
Denmark	Norway	34094
Denmark	Pakistan	133
Denmark	Peru	1024
Denmark	Poland	457822
Denmark	Poland	5636
Denmark	Portugal	382
Denmark	Rep. of Korea	415
Denmark	Rep. of Moldova	56
Denmark	Romania	443
Denmark	Russian Federation	19785
Denmark	Saudi Arabia	208141
Denmark	Senegal	86
Denmark	Serbia	3417
Denmark	Seychelles	211
Denmark	Singapore	168
Denmark	South Africa	147
Denmark	Spain	3860
Denmark	Sweden	676
Denmark	Sweden	4102
Denmark	Switzerland	15147
Denmark	Tajikistan	600
Denmark	Türkiye	2968
Denmark	Turkmenistan	1163
Denmark	Uganda	296
Denmark	Ukraine	6945
Denmark	United Kingdom	7971
Denmark	United Rep. of Tanzania	303
Denmark	USA	6088
Denmark	Uzbekistan	1657
Denmark	Viet Nam	1139
Denmark	Zambia	606
Dominican Rep.	USA	36211.4
Egypt	Japan	44617
Estonia	Austria	2979
Estonia	Latvia	50485
Estonia	Lithuania	59478
Ethiopia	Türkiye	37769.7
Fiji	Germany	52927
Finland	Czechia	273365
Finland	Estonia	70
Finland	Germany	11259
Finland	Germany	461
Finland	Russian Federation	29036
Finland	Sweden	3764980
Finland	Switzerland	13
Finland	United Kingdom	46789216
France	Algeria	2531
France	Andorra	5524
France	Argentina	63046
France	Austria	356698
France	Austria	17917
France	Bahrain	2499
France	Belgium	3595964
France	Belgium	213040
France	Brazil	2842
France	Bulgaria	417
France	Cambodia	27
France	Canada	100980
France	Canada	446
France	China	99857
France	China, Hong Kong SAR	76748
France	Costa Rica	351589
France	Croatia	109
France	Cyprus	8580
France	Cyprus	608
France	Czechia	50673
France	Denmark	14599
France	Estonia	272
France	Finland	48041
France	Finland	1571
France	Germany	28802808
France	Germany	46507
France	Greece	469
France	Guam	282
France	Hungary	88
France	Italy	24746508
France	Italy	11035
France	Japan	3390
France	Lebanon	1406
France	Lithuania	7
France	Luxembourg	17834
France	Luxembourg	18097
France	Madagascar	9681
France	Mexico	20592
France	Morocco	35587
France	N. Mariana Isds	70
France	Netherlands	1488799
France	Netherlands	10456
France	New Caledonia	113513
France	Norway	32310
France	Other Asia, nes	50430
France	Panama	1823
France	Philippines	345
France	Poland	291
France	Portugal	2747870
France	Portugal	741
France	Qatar	158908
France	Rep. of Korea	2010
France	Romania	140824
France	Romania	8605
France	Saudi Arabia	6626
France	Slovenia	1939167
France	Spain	6430478
France	Spain	13016
France	Sweden	434871
France	Sweden	24816
France	Switzerland	7951901
France	Switzerland	1513740
France	Thailand	8366
France	Thailand	4519
France	Türkiye	17950
France	Türkiye	4263
France	United Arab Emirates	179
France	United Kingdom	37066742
France	United Kingdom	490570
France	USA	11850030
France	USA	28188
French Polynesia	Australia	28597
French Polynesia	Brazil	11494
French Polynesia	Canada	1826
French Polynesia	China	555
French Polynesia	China, Hong Kong SAR	18551
French Polynesia	Denmark	67422
French Polynesia	France	361060
French Polynesia	Kazakhstan	1055
French Polynesia	Luxembourg	33789
French Polynesia	New Caledonia	85050
French Polynesia	New Zealand	12794
French Polynesia	USA	701094
French Polynesia	Wallis and Futuna Isds	30267
Germany	Albania	7439.15
Germany	Angola	67.737
Germany	Argentina	7.75316e+06
Germany	Australia	1.01081e+07
Germany	Australia	11660.1
Germany	Austria	5.76635e+07
Germany	Austria	1.23105e+06
Germany	Azerbaijan	8736.78
Germany	Bahrain	9975.98
Germany	Bangladesh	2596.6
Germany	Belgium	1.87168e+08
Germany	Belgium	193761
Germany	Bolivia (Plurinational State of)	1142.24
Germany	Bosnia Herzegovina	27506.7
Germany	Bosnia Herzegovina	61.096
Germany	Brazil	1.54532e+08
Germany	Brunei Darussalam	1730.62
Germany	Bulgaria	11630.9
Germany	Bulgaria	5538.52
Germany	Bunkers	4394.96
Germany	Bunkers	36814.6
Germany	Canada	5.51631e+06
Germany	Canada	24785.2
Germany	Chile	39397.9
Germany	China	2.76033e+08
Germany	China	561.821
Germany	China, Hong Kong SAR	3.01551e+07
Germany	China, Hong Kong SAR	52345
Germany	Costa Rica	438.3
Germany	Croatia	2.66277e+06
Germany	Croatia	709.249
Germany	Curaçao	701.28
Germany	Cyprus	12686.8
Germany	Cyprus	43824.7
Germany	Czechia	6.49488e+06
Germany	Czechia	115145
Germany	Denmark	4.05914e+06
Germany	Denmark	18763.2
Germany	Dominican Rep.	1033.33
Germany	Egypt	25097.3
Germany	Equatorial Guinea	8367.55
Germany	Estonia	1.7463e+06
Germany	Estonia	5106.86
Germany	Finland	757339
Germany	Finland	23847.5
Germany	France	1.5278e+08
Germany	France	217519
Germany	Greece	43540.5
Germany	Greece	6793.65
Germany	Haiti	2103.84
Germany	Hungary	508229
Germany	Hungary	17643.6
Germany	Iceland	82659.4
Germany	Iceland	2333.62
Germany	India	2.46978e+07
Germany	Indonesia	637.528
Germany	Iraq	1191.38
Germany	Ireland	5.1811e+07
Germany	Ireland	1122.31
Germany	Israel	1.02342e+06
Germany	Israel	4114.71
Germany	Italy	6.98288e+07
Germany	Italy	79831.7
Germany	Japan	6.69762e+07
Germany	Japan	23470.3
Germany	Kazakhstan	4299.33
Germany	Kuwait	328469
Germany	Latvia	1.86061e+06
Germany	Latvia	3702.97
Germany	Lebanon	156035
Germany	Lithuania	18504.2
Germany	Lithuania	7358.13
Germany	Luxembourg	1.06132e+06
Germany	Luxembourg	35814.4
Germany	Malaysia	146287
Germany	Malaysia	114549
Germany	Malta	411.737
Germany	Malta	10760.9
Germany	Mexico	44479.5
Germany	Mongolia	21589.6
Germany	Morocco	98.286
Germany	Namibia	138.131
Germany	Netherlands	1.6718e+07
Germany	Netherlands	179784
Germany	New Caledonia	17858.7
Germany	New Zealand	950584
Germany	Norway	8.11233e+06
Germany	Norway	210033
Germany	Oman	58780
Germany	Other Asia, nes	6.08699e+06
Germany	Pakistan	731.829
Germany	Peru	1409.2
Germany	Philippines	1030.67
Germany	Poland	5.10846e+06
Germany	Poland	191706
Germany	Portugal	253063
Germany	Portugal	3656.49
Germany	Qatar	574739
Germany	Qatar	71915.8
Germany	Rep. of Korea	6.58203e+07
Germany	Rep. of Korea	1977.66
Germany	Romania	440760
Germany	Romania	33434.3
Germany	Russian Federation	870230
Germany	Russian Federation	13762.6
Germany	Saudi Arabia	267139
Germany	Saudi Arabia	8885.54
Germany	Serbia	1.31995e+06
Germany	Serbia	2830.36
Germany	Singapore	8.34494e+07
Germany	Singapore	6194.64
Germany	Slovakia	9.28445e+07
Germany	Slovakia	31035.6
Germany	Slovenia	359320
Germany	Slovenia	9337.12
Germany	South Africa	3.71114e+07
Germany	South Africa	3992.52
Germany	Spain	2.09207e+07
Germany	Spain	29657
Germany	Sudan	11866
Germany	Sweden	6.18036e+06
Germany	Sweden	26399
Germany	Switzerland	3.1366e+08
Germany	Switzerland	2.56698e+06
Germany	Thailand	8.86326e+06
Germany	Türkiye	1.13289e+06
Germany	Türkiye	27247.7
Germany	Ukraine	1.49036e+06
Germany	Ukraine	6793.65
Germany	United Arab Emirates	24596.6
Germany	United Arab Emirates	1957.74
Germany	United Kingdom	1.26269e+08
Germany	United Kingdom	339699
Germany	USA	4.2572e+08
Germany	USA	166165
Germany	Viet Nam	192786
Greece	Austria	62962
Greece	Belgium	56
Greece	Bulgaria	763
Greece	Cyprus	61
Greece	Kuwait	1674
Greece	Spain	796
Greece	United Kingdom	1233
Guatemala	USA	960
Hungary	Belgium	96475
Hungary	Czechia	677046
Hungary	Germany	1473577
Hungary	Italy	1425714
Hungary	Mauritius	47066
India	Afghanistan	1218
India	Australia	1646
India	Australia	1608
India	Austria	1599
India	Belgium	101740
India	China, Hong Kong SAR	311338
India	France	86190
India	France	1677
India	Germany	25505
India	Germany	6684
India	Iran	10030
India	Israel	61246
India	Italy	138411
India	Japan	228
India	Netherlands	6527
India	New Zealand	1354
India	Nigeria	48
India	Saudi Arabia	3764
India	Spain	1749
India	Spain	8714
India	Sweden	1642
India	Switzerland	334
India	United Arab Emirates	780719
India	United Kingdom	9088687
India	United Kingdom	2254
India	USA	114849
India	USA	29323
India	Yemen	347
Indonesia	Australia	204
Indonesia	Japan	16485
Indonesia	Singapore	26585
Ireland	Australia	1.329
Ireland	Canada	4051.93
Ireland	China	139099
Ireland	Germany	203190
Ireland	New Zealand	728.019
Ireland	Portugal	838.284
Ireland	Singapore	3192.39
Ireland	Spain	18236.3
Ireland	Sweden	1862.56
Ireland	Thailand	293.599
Ireland	United Kingdom	1.54124e+06
Ireland	United Kingdom	252.415
Ireland	USA	1.59607e+06
Ireland	USA	49062.9
Israel	Germany	301000
Israel	USA	369000
Israel	USA	2000
Italy	Albania	9994
Italy	Armenia	12246
Italy	Australia	228298
Italy	Austria	392630
Italy	Austria	3835
Italy	Belgium	14311404
Italy	Belgium	18419
Italy	Bosnia Herzegovina	2310
Italy	Brazil	5018
Italy	Bulgaria	448562
Italy	Bulgaria	2645
Italy	Canada	186364
Italy	Canada	3152
Italy	Chile	3072
Italy	China	520031
Italy	China, Hong Kong SAR	2212541
Italy	China, Hong Kong SAR	118257
Italy	Colombia	1829
Italy	Croatia	247543
Italy	Croatia	838
Italy	Cyprus	2785
Italy	Cyprus	5796
Italy	Czechia	21789234
Italy	Czechia	3509
Italy	Denmark	874
Italy	Denmark	175
Italy	Estonia	149486
Italy	Estonia	1188
Italy	Finland	6576
Italy	France	46005448
Italy	France	68543
Italy	Germany	53675478
Italy	Germany	23427
Italy	Greece	86643
Italy	Greece	17179
Italy	Hungary	886859
Italy	Iceland	2923
Italy	India	3024107
Italy	Indonesia	68546
Italy	Iran	217716
Italy	Ireland	23061
Italy	Israel	201062
Italy	Japan	2464762
Italy	Latvia	738
Italy	Latvia	1699
Italy	Lithuania	2946374
Italy	Lithuania	4
Italy	Luxembourg	8395
Italy	Malta	824159
Italy	Malta	1190
Italy	Mexico	119888
Italy	Morocco	2958
Italy	Netherlands	14225959
Italy	Netherlands	13323
Italy	Nigeria	42616
Italy	Norway	254728
Italy	Other Asia, nes	233810
Italy	Peru	13864
Italy	Poland	23423410
Italy	Poland	17
Italy	Portugal	125975
Italy	Portugal	5249
Italy	Rep. of Korea	499603
Italy	Romania	72988
Italy	Romania	5156
Italy	Russian Federation	72526
Italy	Russian Federation	5921
Italy	Saudi Arabia	57944
Italy	Seychelles	4859
Italy	Singapore	536746
Italy	Slovakia	89455
Italy	Slovakia	1810
Italy	Slovenia	478
Italy	Slovenia	1702
Italy	South Africa	114814
Italy	Spain	34835565
Italy	Spain	28030
Italy	Sri Lanka	14073
Italy	Sweden	344766
Italy	Sweden	147
Italy	Switzerland	141446085
Italy	Switzerland	2705451
Italy	Thailand	489873
Italy	Türkiye	467544
Italy	United Arab Emirates	295162
Italy	United Kingdom	176564336
Italy	United Kingdom	40625
Italy	USA	647510555
Italy	USA	70020
Italy	Viet Nam	21973
Jamaica	USA	11657.5
Japan	Australia	85299
Japan	Australia	14287
Japan	Austria	14899354
Japan	Belgium	141409
Japan	Bulgaria	2219
Japan	Cambodia	4212
Japan	Canada	6408907
Japan	Canada	24353
Japan	China	152719835
Japan	China	38480
Japan	China, Hong Kong SAR	428402772
Japan	China, Hong Kong SAR	8772783
Japan	Czechia	12333
Japan	Denmark	14552
Japan	Egypt	23485
Japan	Fiji	17111
Japan	France	2033871
Japan	France	92579
Japan	Germany	13957783
Japan	Germany	28518
Japan	India	3863972
Japan	India	13806
Japan	Indonesia	33693
Japan	Indonesia	26044
Japan	Ireland	6941
Japan	Italy	50690
Japan	Italy	64685
Japan	Malaysia	55605030
Japan	Malaysia	77867
Japan	Malta	178199
Japan	New Zealand	2543038
Japan	Other Asia, nes	109229806
Japan	Other Asia, nes	416181
Japan	Philippines	883034
Japan	Portugal	102305
Japan	Rep. of Korea	51736969
Japan	Rep. of Korea	39887
Japan	Saudi Arabia	2162
Japan	Saudi Arabia	4249
Japan	Singapore	146736647
Japan	Singapore	150786
Japan	Slovakia	2314
Japan	Spain	3928
Japan	Sweden	2361
Japan	Switzerland	294116994
Japan	Switzerland	20539
Japan	Thailand	39080743
Japan	Thailand	130852
Japan	Türkiye	35553
Japan	United Arab Emirates	7024468
Japan	United Arab Emirates	15487
Japan	United Kingdom	16310903
Japan	United Kingdom	558478
Japan	USA	50815484
Japan	USA	485861
Japan	Viet Nam	11974659
Japan	Viet Nam	3617
Jordan	China, Hong Kong SAR	6959
Kazakhstan	Kyrgyzstan	203
Kuwait	Bahrain	4619
Kuwait	Qatar	1309
Kuwait	Saudi Arabia	573
Kuwait	United Arab Emirates	2439
Latvia	Cyprus	484451
Latvia	Estonia	887828
Latvia	Russian Federation	394.13
Latvia	United Kingdom	1.21568e+06
Lebanon	Côte d'Ivoire	533
Lebanon	Iraq	24495
Lebanon	USA	39802
Lithuania	Estonia	183
Lithuania	Latvia	78
Lithuania	Poland	1234
Luxembourg	Belgium	7307
Luxembourg	Canada	8
Luxembourg	China	7
Luxembourg	Czechia	16077
Luxembourg	France	75415
Luxembourg	Germany	259630
Luxembourg	Germany	247
Luxembourg	Switzerland	44623
Luxembourg	USA	294
Madagascar	Canada	8651.18
Malaysia	China, Hong Kong SAR	40155
Malaysia	China, Hong Kong SAR	255710
Malaysia	France	1777
Malaysia	French Polynesia	8700
Malaysia	Germany	77980
Malaysia	Indonesia	15494
Malaysia	Italy	12714
Malaysia	Japan	8266938
Malaysia	New Zealand	2236
Malaysia	Rep. of Korea	17508
Malaysia	Singapore	16161
Malaysia	Thailand	11672
Malaysia	United Kingdom	488021
Malaysia	USA	18975
Malta	Italy	1351
Mauritius	France	141
Mauritius	Romania	8890
Mexico	USA	7571957
Mexico	USA	149339
Mongolia	France	110
Morocco	Gabon	13756
Morocco	Libya	3737
Morocco	Senegal	47003
Namibia	South Africa	87
Nepal	China	96
Netherlands	Austria	392354
Netherlands	Belgium	3.61331e+06
Netherlands	Belgium	46353.3
Netherlands	China	1385.49
Netherlands	Denmark	39.851
Netherlands	France	41.179
Netherlands	France	41499.5
Netherlands	Germany	1.11344e+07
Netherlands	Germany	8281.03
Netherlands	India	1604.67
Netherlands	Ireland	3577.29
Netherlands	Italy	454.301
Netherlands	Lithuania	43.836
Netherlands	Luxembourg	1490.43
Netherlands	Poland	540.645
Netherlands	Russian Federation	9.299
Netherlands	South Africa	2391.06
Netherlands	Spain	65.09
Netherlands	Spain	2308.7
Netherlands	Sri Lanka	2000.52
Netherlands	Sweden	670.825
Netherlands	Switzerland	22669.9
Netherlands	Switzerland	1323.05
Netherlands	United Kingdom	5.5724e+06
Netherlands	United Kingdom	102.284
Netherlands	USA	22333.8
New Zealand	Australia	1.1436e+06
New Zealand	Australia	38422.1
New Zealand	Cook Isds	14393
New Zealand	Fiji	51972.3
New Zealand	French Polynesia	69140.7
New Zealand	Norfolk Isds	11050.8
New Zealand	Thailand	390246
New Zealand	United Kingdom	1745.52
New Zealand	USA	6375.29
New Zealand	USA	61438.8
Nigeria	Ghana	43827
North Macedonia	Montenegro	10482
Norway	Denmark	2761
Norway	Finland	43088
Norway	France	795
Norway	Germany	54798366
Norway	Israel	1735
Norway	Japan	27277177
Norway	Sweden	1105233
Norway	United Kingdom	57516507
Norway	USA	148538724
Oman	United Arab Emirates	242346
Other Asia, nes	Australia	3998
Other Asia, nes	China	3429727
Other Asia, nes	China	116341
Other Asia, nes	China, Hong Kong SAR	9619782
Other Asia, nes	China, Hong Kong SAR	47812
Other Asia, nes	France	6674
Other Asia, nes	France	10408
Other Asia, nes	Germany	53799645
Other Asia, nes	India	2214
Other Asia, nes	Iran	574369
Other Asia, nes	Italy	12292
Other Asia, nes	Italy	3238
Other Asia, nes	Japan	79357797
Other Asia, nes	Japan	51975
Other Asia, nes	Malaysia	47912519
Other Asia, nes	Malaysia	165
Other Asia, nes	Rep. of Korea	790893
Other Asia, nes	Saudi Arabia	4857
Other Asia, nes	Singapore	93758558
Other Asia, nes	Spain	11267
Other Asia, nes	Switzerland	5284870
Other Asia, nes	Thailand	6344
Other Asia, nes	United Kingdom	6013479
Other Asia, nes	USA	19023535
Other Asia, nes	USA	9979
Pakistan	Canada	2740
Peru	Brazil	270524
Peru	United Kingdom	24088.5
Philippines	China	1157
Philippines	Germany	3030
Philippines	Greece	750
Philippines	Japan	105234
Philippines	United Kingdom	1598
Poland	Areas, nes	6220
Poland	Australia	531
Poland	Austria	1
Poland	Belgium	11796
Poland	Bunkers	155368
Poland	Canada	670
Poland	China	2453
Poland	China, Hong Kong SAR	415
Poland	Czechia	823878
Poland	Czechia	326
Poland	Denmark	1
Poland	Finland	15
Poland	Germany	3065334
Poland	Germany	2776
Poland	Greece	21
Poland	Italy	11803546
Poland	Japan	124
Poland	Lithuania	98
Poland	Netherlands	6780114
Poland	Netherlands	55
Poland	Norway	4554
Poland	Romania	15421
Poland	Russian Federation	149
Poland	Slovakia	2
Poland	Slovenia	18
Poland	Spain	12608
Poland	Sweden	30
Poland	Switzerland	135374
Poland	Ukraine	14856
Poland	Ukraine	56
Poland	United Kingdom	3097293
Poland	USA	5285
Portugal	Germany	220812
Portugal	Ireland	258768
Portugal	Italy	4774425
Portugal	Spain	73893
Portugal	Spain	7471
Portugal	Switzerland	3
Portugal	United Kingdom	277385
Portugal	USA	9289
Rep. of Korea	Australia	23878
Rep. of Korea	China	222695
Rep. of Korea	China	776
Rep. of Korea	China, Hong Kong SAR	4001559
Rep. of Korea	China, Hong Kong SAR	1688
Rep. of Korea	France	4756
Rep. of Korea	Germany	3196619
Rep. of Korea	India	156495
Rep. of Korea	Indonesia	104213
Rep. of Korea	Iran	327
Rep. of Korea	Israel	38424
Rep. of Korea	Japan	88166237
Rep. of Korea	Japan	199410
Rep. of Korea	Other Asia, nes	4140306
Rep. of Korea	Singapore	368
Rep. of Korea	Spain	6986
Rep. of Korea	Thailand	63624
Rep. of Korea	United Kingdom	140366767
Rep. of Korea	United Kingdom	879
Rep. of Korea	USA	129333142
Rep. of Korea	Viet Nam	418802
Russian Federation	Armenia	3953
Russian Federation	Belarus	15787019
Russian Federation	Belarus	4299
Russian Federation	China, Hong Kong SAR	15628912
Russian Federation	China, Hong Kong SAR	6519
Russian Federation	Czechia	12035
Russian Federation	Estonia	3711
Russian Federation	Finland	472
Russian Federation	Germany	123428678
Russian Federation	India	12672
Russian Federation	Israel	527
Russian Federation	Italy	17988430
Russian Federation	Japan	299422263
Russian Federation	Japan	649
Russian Federation	Kazakhstan	16557
Russian Federation	Kazakhstan	1536
Russian Federation	Kyrgyzstan	319
Russian Federation	Latvia	349751
Russian Federation	Latvia	1156
Russian Federation	Mongolia	81
Russian Federation	Morocco	306
Russian Federation	Netherlands	8
Russian Federation	Rep. of Moldova	24485
Russian Federation	Sweden	78
Russian Federation	Switzerland	26662
Russian Federation	Ukraine	642985
Russian Federation	United Kingdom	36241161
Russian Federation	USA	105693528
Russian Federation	USA	14628
Rwanda	Kenya	31016.4
Saint Lucia	USA	101337
Serbia	Germany	738341
Serbia	Switzerland	664773
Serbia	United Kingdom	77573
Singapore	Australia	89628
Singapore	Brunei Darussalam	10342.3
Singapore	Cambodia	14487.2
Singapore	China	613053
Singapore	China, Hong Kong SAR	2.45464e+07
Singapore	China, Hong Kong SAR	290350
Singapore	Germany	6.47519e+07
Singapore	Germany	2003.39
Singapore	Indonesia	153949
Singapore	Indonesia	54854.2
Singapore	Japan	5.57654e+07
Singapore	Japan	244080
Singapore	Malaysia	3.9662e+07
Singapore	Malaysia	315005
Singapore	Morocco	184873
Singapore	New Zealand	1876.25
Singapore	Other Asia, nes	6.30691e+06
Singapore	Philippines	8183.32
Singapore	Rep. of Korea	5811.95
Singapore	Romania	2158.95
Singapore	Spain	1666.99
Singapore	Switzerland	26588.9
Singapore	Switzerland	24473.4
Singapore	Thailand	112735
Singapore	Thailand	5671.39
Singapore	Türkiye	6151.51
Singapore	United Arab Emirates	802.302
Singapore	United Kingdom	2.11578e+06
Singapore	United Kingdom	46140.3
Singapore	USA	8.94891e+07
Singapore	USA	72756
Singapore	Viet Nam	201483
Slovakia	Austria	42032.4
Slovakia	Czechia	5.35874e+07
Slovakia	Czechia	273.671
Slovakia	Germany	225663
Slovakia	Germany	367.995
Slovakia	Norway	1999.39
Slovakia	Serbia	530.072
Slovakia	United Kingdom	3.98587e+07
Slovenia	Austria	196153
Slovenia	Austria	4477
Slovenia	Bosnia Herzegovina	1742
Slovenia	Bosnia Herzegovina	13040
Slovenia	Bulgaria	545
Slovenia	Croatia	56166
Slovenia	Croatia	59048
Slovenia	Czechia	10552
Slovenia	Germany	38782
Slovenia	Japan	1003
Slovenia	Montenegro	1095
Slovenia	North Macedonia	377
Slovenia	Serbia	478
Slovenia	Serbia	15508
South Africa	Australia	19234.9
South Africa	Belgium	83318.2
South Africa	Botswana	1925.98
South Africa	Botswana	5225.82
South Africa	Brazil	10045.2
South Africa	China	2.11651e+08
South Africa	China, Hong Kong SAR	6.36452e+08
South Africa	Czechia	421150
South Africa	Eswatini	32.976
South Africa	Eswatini	1205.94
South Africa	Germany	5.68384e+08
South Africa	Ghana	1202.44
South Africa	India	1.48644e+07
South Africa	Italy	8.67157e+07
South Africa	Japan	1.82422e+09
South Africa	Lesotho	983.578
South Africa	Mauritius	1323.01
South Africa	Namibia	280.391
South Africa	Namibia	23055.7
South Africa	Rep. of Korea	1.90661e+07
South Africa	Special Categories	80.322
South Africa	Sweden	46.056
South Africa	Switzerland	8.10908e+08
South Africa	United Kingdom	1.26861e+09
South Africa	USA	1.06062e+09
South Africa	Zambia	295.589
Spain	Andorra	5759.22
Spain	Andorra	13185.6
Spain	Areas, nes	6168.58
Spain	Australia	10629.3
Spain	Austria	10403.4
Spain	Belgium	1.61192e+06
Spain	Belgium	201.957
Spain	Bulgaria	1044.89
Spain	Canada	643.046
Spain	Chile	11628.8
Spain	China, Hong Kong SAR	790.049
Spain	Croatia	4247.35
Spain	Czechia	151.467
Spain	Dominican Rep.	3690.26
Spain	Ecuador	7959.13
Spain	El Salvador	1430.25
Spain	France	9.44965e+06
Spain	France	16226.6
Spain	Germany	1.92403e+06
Spain	Gibraltar	913.455
Spain	Greece	1055.34
Spain	Greece	41582.5
Spain	Guatemala	1111.27
Spain	Italy	1.55596e+07
Spain	Italy	106570
Spain	Japan	1491.65
Spain	Kuwait	233.778
Spain	Libya	182.837
Spain	Lithuania	46.503
Spain	Mexico	198042
Spain	Netherlands	8486.19
Spain	Panama	5230.82
Spain	Peru	69078.3
Spain	Poland	48620.1
Spain	Portugal	112144
Spain	Portugal	209795
Spain	Rep. of Korea	4343.33
Spain	Romania	523.493
Spain	Saudi Arabia	19.133
Spain	Slovakia	53025.8
Spain	Switzerland	9.84359e+06
Spain	Switzerland	1718.38
Spain	United Arab Emirates	5414.87
Spain	United Kingdom	4.29985e+07
Spain	United Kingdom	2682.36
Spain	USA	87361.5
Spain	Venezuela	317.643
Sweden	Australia	146.128
Sweden	Austria	584.511
Sweden	Belgium	292.256
Sweden	Belgium	438.383
Sweden	Canada	3068.68
Sweden	China	431369
Sweden	China, Hong Kong SAR	146.128
Sweden	Denmark	48514.4
Sweden	Denmark	11251.8
Sweden	Estonia	146.128
Sweden	Finland	463810
Sweden	Finland	44715.1
Sweden	France	146.128
Sweden	Germany	280565
Sweden	Germany	16074.1
Sweden	India	292.256
Sweden	Iran	1169.02
Sweden	Lithuania	146.128
Sweden	Malaysia	9936.69
Sweden	Netherlands	292.256
Sweden	Norway	23526.6
Sweden	Norway	260692
Sweden	Poland	31417.5
Sweden	Romania	584.511
Sweden	Slovakia	31417.5
Sweden	Spain	1315.15
Sweden	United Arab Emirates	292.256
Sweden	USA	19142.7
Sweden	USA	292.256
Switzerland	Aruba	7023.99
Switzerland	Australia	2.03761e+06
Switzerland	Austria	3.07375e+06
Switzerland	Belgium	6.20536e+06
Switzerland	Belgium	28863.9
Switzerland	Brazil	8853.72
Switzerland	Bulgaria	173379
Switzerland	Canada	1.01434e+07
Switzerland	China	5.26693e+07
Switzerland	China, Hong Kong SAR	6.45035e+08
Switzerland	China, Hong Kong SAR	1.10878e+07
Switzerland	Colombia	3505.44
Switzerland	Costa Rica	39343.1
Switzerland	Czechia	2.9074e+06
Switzerland	Czechia	7646.65
Switzerland	Denmark	960665
Switzerland	Finland	414952
Switzerland	France	2.2891e+07
Switzerland	France	4.85978e+06
Switzerland	Germany	3.36347e+08
Switzerland	Germany	335136
Switzerland	Greece	46733
Switzerland	Hungary	74736.1
Switzerland	India	1.03337e+07
Switzerland	India	600808
Switzerland	Indonesia	109543
Switzerland	Iran	1541.35
Switzerland	Ireland	2252.48
Switzerland	Israel	490063
Switzerland	Italy	1.61743e+08
Switzerland	Italy	2.90887e+06
Switzerland	Japan	1.43693e+08
Switzerland	Lebanon	182588
Switzerland	Lebanon	438215
Switzerland	Luxembourg	1993850
Switzerland	Luxembourg	797.436
Switzerland	Malaysia	2.02148e+06
Switzerland	Mauritius	68.82
Switzerland	Mauritius	180.242
Switzerland	Netherlands	1.34853e+06
Switzerland	New Zealand	710.046
Switzerland	Norway	72828.8
Switzerland	Norway	21774.4
Switzerland	Pakistan	3122.02
Switzerland	Poland	85015.4
Switzerland	Qatar	2.29355e+06
Switzerland	Rep. of Korea	3.30028e+06
Switzerland	Russian Federation	3408.22
Switzerland	Saint Kitts and Nevis	4227.5
Switzerland	San Marino	1.22079e+06
Switzerland	Saudi Arabia	110342
Switzerland	Singapore	45422.2
Switzerland	South Africa	5.10263e+07
Switzerland	Spain	1.13615e+06
Switzerland	Spain	49092.6
Switzerland	Sri Lanka	1686.63
Switzerland	Sweden	892989
Switzerland	Thailand	142129
Switzerland	Türkiye	29628.6
Switzerland	United Arab Emirates	3.75034e+06
Switzerland	United Arab Emirates	1.7848e+06
Switzerland	United Kingdom	3.08028e+08
Switzerland	United Kingdom	2.40848e+06
Switzerland	USA	5.22464e+08
Switzerland	USA	8.63362e+06
Switzerland	Viet Nam	169.319
Thailand	Australia	21296
Thailand	Australia	709336
Thailand	Austria	447403
Thailand	Belgium	2
Thailand	Canada	48
Thailand	China	3098
Thailand	China	2438
Thailand	China, Hong Kong SAR	366775
Thailand	China, Hong Kong SAR	678305
Thailand	Czechia	4578
Thailand	Denmark	10
Thailand	France	1686
Thailand	Georgia	779
Thailand	Germany	45
Thailand	Germany	5087
Thailand	India	1
Thailand	India	26158
Thailand	Indonesia	21530
Thailand	Indonesia	11500
Thailand	Ireland	2370
Thailand	Italy	129
Thailand	Japan	209095
Thailand	Japan	351708
Thailand	Malaysia	22
Thailand	Malaysia	125
Thailand	N. Mariana Isds	998
Thailand	New Zealand	120
Thailand	New Zealand	4357
Thailand	Norway	317
Thailand	Other Asia, nes	12
Thailand	Philippines	42
Thailand	Rep. of Korea	657
Thailand	Rep. of Korea	156
Thailand	Singapore	26913
Thailand	Singapore	122934
Thailand	South Africa	1
Thailand	Spain	329
Thailand	Switzerland	10048
Thailand	Türkiye	31527
Thailand	United Arab Emirates	1744000
Thailand	United Kingdom	70041
Thailand	United Kingdom	10103
Thailand	USA	44101
Thailand	USA	87676
Thailand	Viet Nam	3430
Türkiye	Azerbaijan	683
Türkiye	Bosnia Herzegovina	166
Türkiye	Canada	2007
Türkiye	Cyprus	2919
Türkiye	Estonia	1050
Türkiye	Germany	330762
Türkiye	Hungary	222
Türkiye	Iran	353
Türkiye	Iraq	7604
Türkiye	Iraq	4616
Türkiye	Italy	44017
Türkiye	Japan	114
Türkiye	North Macedonia	4187
Türkiye	Russian Federation	4200
Türkiye	United Arab Emirates	65335
Türkiye	United Kingdom	7599360
Türkiye	USA	310841
Türkiye	Uzbekistan	997
Türkiye	Yemen	208
Ukraine	Areas, nes	597
Ukraine	Germany	218945
Ukraine	Russian Federation	430893
Ukraine	Russian Federation	924
United Arab Emirates	Bangladesh	554491
United Arab Emirates	Belgium	1.09126e+06
United Arab Emirates	Chad	4901.29
United Arab Emirates	France	34658.6
United Arab Emirates	India	4.74131e+06
United Arab Emirates	Malaysia	154527
United Arab Emirates	Malaysia	73706.1
United Arab Emirates	Netherlands	1.09888e+06
United Arab Emirates	Oman	1193.74
United Arab Emirates	Qatar	1.21885e+06
United Arab Emirates	Qatar	5445.88
United Arab Emirates	Saudi Arabia	6.359e+06
United Arab Emirates	Sri Lanka	304804
United Arab Emirates	Switzerland	376783
United Arab Emirates	Switzerland	2.19217e+06
United Arab Emirates	Thailand	603349
United Arab Emirates	Türkiye	8.96819e+06
United Arab Emirates	United Kingdom	1.32791e+07
United Arab Emirates	USA	1.11318e+06
United Arab Emirates	Yemen	77409.1
United Kingdom	Argentina	76822725
United Kingdom	Australia	8625935
United Kingdom	Australia	57282
United Kingdom	Austria	11761370
United Kingdom	Austria	4671
United Kingdom	Bahrain	29063
United Kingdom	Belgium	25596328
United Kingdom	Belgium	1083
United Kingdom	Brazil	1250166
United Kingdom	Bulgaria	65526
United Kingdom	Bulgaria	24069
United Kingdom	Canada	6461608
United Kingdom	Canada	3613
United Kingdom	China	251883269
United Kingdom	China, Hong Kong SAR	643019709
United Kingdom	China, Hong Kong SAR	303175
United Kingdom	China, Macao SAR	4803
United Kingdom	Colombia	5516
United Kingdom	Congo	6864
United Kingdom	Croatia	1954
United Kingdom	Cyprus	45858
United Kingdom	Cyprus	15889
United Kingdom	Czechia	12909022
United Kingdom	Czechia	115992
United Kingdom	Denmark	2338379
United Kingdom	Denmark	11941
United Kingdom	Egypt	4266081
United Kingdom	Egypt	18194
United Kingdom	Estonia	5050
United Kingdom	Estonia	25283
United Kingdom	Finland	3071616
United Kingdom	Finland	4917
United Kingdom	France	26637120
United Kingdom	France	56541
United Kingdom	Georgia	1137412
United Kingdom	Germany	858295829
United Kingdom	Germany	60234
United Kingdom	Ghana	6310
United Kingdom	Gibraltar	2956
United Kingdom	Greece	15372
United Kingdom	Greece	2918
United Kingdom	Hungary	7093
United Kingdom	India	101515666
United Kingdom	Ireland	21206469
United Kingdom	Ireland	278180
United Kingdom	Israel	1579225
United Kingdom	Italy	75638986
United Kingdom	Italy	64688
United Kingdom	Japan	289168405
United Kingdom	Japan	50263
United Kingdom	Kuwait	29669
United Kingdom	Kuwait	1683
United Kingdom	Latvia	10596
United Kingdom	Latvia	32137
United Kingdom	Lithuania	1841075
United Kingdom	Luxembourg	143446
United Kingdom	Malaysia	32467
United Kingdom	Malta	4446
United Kingdom	Mexico	535008
United Kingdom	Netherlands	13837385
United Kingdom	Netherlands	16831
United Kingdom	New Zealand	9715
United Kingdom	New Zealand	2972
United Kingdom	Nigeria	5241
United Kingdom	North Macedonia	811970983
United Kingdom	Norway	8368108
United Kingdom	Norway	3501
United Kingdom	Other Asia, nes	7798046
United Kingdom	Other Asia, nes	1953
United Kingdom	Pakistan	1054234
United Kingdom	Poland	20208695
United Kingdom	Portugal	105551
United Kingdom	Portugal	63
United Kingdom	Rep. of Korea	154107952
United Kingdom	Rep. of Korea	4885
United Kingdom	Romania	5070477
United Kingdom	Romania	24647
United Kingdom	Russian Federation	12698
United Kingdom	Russian Federation	4495
United Kingdom	Saudi Arabia	6886
United Kingdom	Saudi Arabia	3804
United Kingdom	Senegal	22311
United Kingdom	Singapore	244199
United Kingdom	Singapore	6762
United Kingdom	Slovakia	17775971
United Kingdom	Slovakia	6147
United Kingdom	Slovenia	297518
United Kingdom	Slovenia	26
United Kingdom	South Africa	70282877
United Kingdom	Spain	32907598
United Kingdom	Spain	476595
United Kingdom	Sweden	2601390
United Kingdom	Sweden	4563
United Kingdom	Switzerland	41712258
United Kingdom	Switzerland	757354
United Kingdom	Thailand	428427
United Kingdom	Thailand	638532
United Kingdom	Tunisia	816619
United Kingdom	Türkiye	2039582
United Kingdom	Ukraine	1140086
United Kingdom	United Arab Emirates	40629
United Kingdom	United Arab Emirates	543406
United Kingdom	USA	918872472
United Kingdom	USA	257864
United Rep. of Tanzania	China, Hong Kong SAR	1198
United Rep. of Tanzania	Egypt	67
United Rep. of Tanzania	Netherlands	20
USA	Argentina	87220
USA	Argentina	7000
USA	Aruba	30449
USA	Australia	9880374
USA	Australia	345895
USA	Austria	244566
USA	Austria	10482
USA	Bahamas	18184
USA	Bahamas	35665
USA	Barbados	27168
USA	Barbados	61644
USA	Belarus	603044
USA	Belgium	301888
USA	Bermuda	121447
USA	Bolivia (Plurinational State of)	17297
USA	Brazil	64626500
USA	Bulgaria	3557
USA	Cambodia	36760
USA	Canada	219644973
USA	Canada	3737207
USA	Cayman Isds	12289
USA	Chile	10347101
USA	China	171089469
USA	China	65645
USA	China, Hong Kong SAR	115502564
USA	China, Hong Kong SAR	3654712
USA	Colombia	944503
USA	Colombia	97408
USA	Costa Rica	823698
USA	Croatia	598715
USA	Curaçao	8593
USA	Czechia	230599
USA	Denmark	643550
USA	Dominica	3025
USA	Dominican Rep.	306332
USA	Ecuador	8988
USA	Finland	123045
USA	France	10117454
USA	France	62448
USA	Germany	252615375
USA	Germany	164807
USA	Greece	14569
USA	Guatemala	8109
USA	Haiti	3067
USA	Honduras	4003
USA	Iceland	2565
USA	India	38392032
USA	India	30650
USA	Iraq	4801
USA	Ireland	10915541
USA	Ireland	2965
USA	Israel	9903698
USA	Italy	402395551
USA	Italy	4400
USA	Jamaica	16887
USA	Japan	266522627
USA	Japan	2036036
USA	Jordan	9870
USA	Kuwait	189404
USA	Lao People's Dem. Rep.	1321495
USA	Lebanon	115160
USA	Luxembourg	2405806
USA	Madagascar	5321
USA	Malaysia	108096
USA	Mexico	14031759
USA	Mexico	140014
USA	Netherlands	609258
USA	Netherlands	383515
USA	New Zealand	977314
USA	Norway	509933
USA	Norway	2949
USA	Other Asia, nes	18826015
USA	Other Asia, nes	5268
USA	Panama	23442
USA	Panama	57533
USA	Peru	225419
USA	Philippines	113597
USA	Poland	39558
USA	Qatar	26258
USA	Rep. of Korea	428740788
USA	Rep. of Korea	43105
USA	Romania	39694
USA	Saint Lucia	2977
USA	Saudi Arabia	536069
USA	Saudi Arabia	3500
USA	Singapore	137233882
USA	Singapore	370809
USA	Sint Maarten	1092321
USA	South Africa	49882159
USA	Spain	336372
USA	Spain	26360
USA	Sweden	255060
USA	Sweden	6000
USA	Switzerland	125026650
USA	Switzerland	304767
USA	Thailand	4136473
USA	Thailand	113367
USA	Trinidad and Tobago	15158
USA	Türkiye	630702
USA	United Arab Emirates	3461999
USA	United Arab Emirates	14070
USA	United Kingdom	355944580
USA	United Kingdom	1946433
USA	Uruguay	126924
USA	Uruguay	12922
USA	Viet Nam	680906
Viet Nam	Cambodia	2106
Viet Nam	Italy	111199
Viet Nam	Japan	57286
Viet Nam	Japan	784560
Viet Nam	USA	62996
Zimbabwe	South Africa	1.36893e+08

## Sheet: 2015
source	target	weight
Andorra	France	431.293
Andorra	Netherlands	106.437
Andorra	Spain	2027.62
Australia	Bunkers	116064
Australia	Canada	18929
Australia	China	8198
Australia	China	6815
Australia	China, Hong Kong SAR	5341
Australia	China, Hong Kong SAR	677542
Australia	Fiji	44206
Australia	Germany	752
Australia	Germany	2311
Australia	India	61257
Australia	Indonesia	89974
Australia	Japan	49434
Australia	Netherlands	7435
Australia	New Caledonia	97201
Australia	New Zealand	54654
Australia	New Zealand	356731
Australia	Seychelles	31894
Australia	Sierra Leone	10488
Australia	Singapore	38536
Australia	Singapore	147479
Australia	Switzerland	59760
Australia	Switzerland	21005
Australia	Thailand	561523
Australia	Ukraine	2992
Australia	United Arab Emirates	230939
Australia	United Kingdom	906743
Australia	United Kingdom	23787
Australia	USA	16735
Australia	USA	851714
Australia	Vanuatu	170418
Australia	Viet Nam	40013
Austria	Argentina	12729
Austria	Australia	224796
Austria	Belgium	861640
Austria	Belgium	240204
Austria	Bonaire	428
Austria	Bosnia Herzegovina	17236
Austria	Bulgaria	119615
Austria	Canada	49
Austria	Chile	8170
Austria	China	94654
Austria	China	3619
Austria	China, Hong Kong SAR	120374
Austria	China, Hong Kong SAR	5356
Austria	Croatia	4878
Austria	Czechia	1057552
Austria	Czechia	167
Austria	Denmark	67773
Austria	Egypt	110456
Austria	Finland	609
Austria	France	304437
Austria	France	1156
Austria	Germany	66679711
Austria	Germany	86464
Austria	Greece	68201
Austria	Hungary	54311
Austria	Hungary	5612
Austria	India	8589
Austria	Italy	1845445
Austria	Italy	4750
Austria	Japan	71
Austria	Japan	15343
Austria	Kazakhstan	653
Austria	Lithuania	1500
Austria	Lithuania	82
Austria	Luxembourg	231794
Austria	Luxembourg	62
Austria	Malta	76854
Austria	Mongolia	248
Austria	Netherlands	3220861
Austria	Poland	7955
Austria	Poland	580
Austria	Portugal	29557
Austria	Portugal	1407
Austria	Romania	2890
Austria	Romania	11975
Austria	Russian Federation	1103
Austria	Serbia	2163
Austria	Slovakia	41185
Austria	Slovakia	18518
Austria	Slovenia	889975
Austria	Slovenia	3601
Austria	South Africa	2563
Austria	Spain	13306
Austria	Spain	4420
Austria	Sweden	944166
Austria	Switzerland	358469
Austria	Switzerland	5327
Austria	Tajikistan	2472
Austria	Türkiye	900902
Austria	Türkiye	173
Austria	Ukraine	82
Austria	United Arab Emirates	19413
Austria	United Kingdom	12716401
Austria	United Kingdom	2479
Austria	USA	3070202
Austria	USA	1337
Austria	Viet Nam	547259
Bahrain	Kuwait	2521.27
Bahrain	Saudi Arabia	11977.3
Bahrain	United Kingdom	399.999
Barbados	USA	613960
Belgium	Australia	527.48
Belgium	Austria	95.979
Belgium	Austria	67.406
Belgium	Azerbaijan	25621.7
Belgium	Benin	4197.25
Belgium	Brazil	5.45e+06
Belgium	Bulgaria	1881.7
Belgium	China	1.01e+07
Belgium	Czechia	2.23964e+06
Belgium	Denmark	3795.79
Belgium	Egypt	57.745
Belgium	France	7.82781e+06
Belgium	France	771.626
Belgium	Germany	2.62311e+08
Belgium	Germany	916.244
Belgium	Greece	1575.73
Belgium	India	171.416
Belgium	Ireland	17749.5
Belgium	Italy	4.99127e+06
Belgium	Kenya	5416.91
Belgium	Luxembourg	3836.96
Belgium	Luxembourg	14.852
Belgium	Netherlands	44210
Belgium	Netherlands	6.855
Belgium	Norway	3076.59
Belgium	Poland	1046.43
Belgium	Rep. of Korea	46.93
Belgium	Saudi Arabia	471.155
Belgium	Slovenia	12875.8
Belgium	South Africa	4.936
Belgium	Spain	3942.54
Belgium	Switzerland	4.51053e+06
Belgium	Switzerland	115.19
Belgium	Tunisia	1233.92
Belgium	Türkiye	364.938
Belgium	Türkiye	310.299
Belgium	Ukraine	137.585
Belgium	United Kingdom	3.70828e+07
Belgium	United Kingdom	11.292
Belgium	USA	4.09691e+07
Brazil	Chile	2234
Brazil	Germany	2519785
Brazil	Guatemala	1251
Brazil	USA	1625669
Brazil	USA	647
Bulgaria	Austria	3602
Bulgaria	Germany	26305
Bulgaria	Italy	22032
Bulgaria	Spain	16648
Canada	Australia	776.98
Canada	Australia	18662.4
Canada	Bolivia (Plurinational State of)	5992.06
Canada	Chile	46792.5
Canada	China	2587.59
Canada	China, Hong Kong SAR	328719
Canada	Colombia	10418.4
Canada	Croatia	5168.91
Canada	Egypt	3743.28
Canada	Finland	39083.7
Canada	France	23566.8
Canada	Germany	1.89739e+07
Canada	Greece	3420.9
Canada	India	10144.6
Canada	Israel	4355.16
Canada	Japan	4697.09
Canada	Mexico	862929
Canada	Netherlands	5593.79
Canada	Other Asia, nes	1620.47
Canada	Peru	22264
Canada	Philippines	34372.6
Canada	Rep. of Korea	10764.3
Canada	Sierra Leone	18071.6
Canada	Singapore	1173.69
Canada	Slovenia	4908.35
Canada	South Africa	45132.1
Canada	Spain	78.246
Canada	Switzerland	485541
Canada	Trinidad and Tobago	452.26
Canada	Türkiye	70861.7
Canada	United Arab Emirates	1287.14
Canada	United Kingdom	3.74133e+07
Canada	USA	1.42884e+08
Canada	USA	1.03667e+06
Chile	Spain	394.53
China	Albania	3150
China	Algeria	72277
China	Aruba	29100
China	Australia	293344
China	Austria	37820
China	Bahrain	485
China	Belgium	36128
China	Brazil	61247
China	Bulgaria	21910
China	Canada	136027
China	Chile	33882
China	China, Hong Kong SAR	170408
China	China, Hong Kong SAR	21593864
China	Colombia	5840
China	Costa Rica	3309
China	Curaçao	10050
China	Cyprus	3066
China	Czechia	63478
China	Denmark	59831
China	Egypt	55395
China	Fiji	824
China	Finland	45863
China	France	374116
China	Georgia	807
China	Germany	3538758
China	Germany	719988
China	Greece	1830
China	Honduras	3901
China	Hungary	10
China	India	35312
China	Indonesia	99197
China	Ireland	610
China	Israel	27972
China	Italy	152990
China	Japan	37441561
China	Japan	945827
China	Kazakhstan	34492
China	Latvia	29200
China	Libya	14947
China	Luxembourg	15967
China	Malaysia	51468
China	Maldives	4979
China	Mexico	54840
China	Netherlands	55507
China	New Zealand	31466
China	Norway	8011
China	Other Asia, nes	13200
China	Panama	138651
China	Philippines	15053
China	Poland	27484
China	Portugal	4448
China	Qatar	10276
China	Rep. of Korea	1155887
China	Romania	2181
China	Russian Federation	3554578
China	Samoa	2311
China	Saudi Arabia	3750
China	Singapore	82577
China	Slovakia	101640
China	Slovenia	9275
China	South Africa	63419
China	Spain	24123
China	Sri Lanka	4406
China	Sweden	112019
China	Switzerland	446069
China	Thailand	30580
China	Tonga	1636
China	Türkiye	60350
China	United Arab Emirates	19315
China	United Kingdom	672770
China	Uruguay	9100
China	USA	23237597
China	USA	6861935
China	Viet Nam	1500
China, Hong Kong SAR	Argentina	1300.09
China, Hong Kong SAR	Australia	698688
China, Hong Kong SAR	Australia	540432
China, Hong Kong SAR	Austria	174034
China, Hong Kong SAR	Belgium	3064.85
China, Hong Kong SAR	Brazil	13674.3
China, Hong Kong SAR	Canada	342857
China, Hong Kong SAR	China	9.19035e+08
China, Hong Kong SAR	China	3.74801e+06
China, Hong Kong SAR	China, Macao SAR	662173
China, Hong Kong SAR	Czechia	8492.52
China, Hong Kong SAR	Denmark	58068
China, Hong Kong SAR	El Salvador	944.689
China, Hong Kong SAR	Fiji	45550.3
China, Hong Kong SAR	Finland	16108
China, Hong Kong SAR	France	543494
China, Hong Kong SAR	France	1.55808e+06
China, Hong Kong SAR	Germany	3.7974e+06
China, Hong Kong SAR	Germany	3.21153e+06
China, Hong Kong SAR	Gibraltar	2276.9
China, Hong Kong SAR	Greece	1826.04
China, Hong Kong SAR	Hungary	2334.95
China, Hong Kong SAR	India	1.37855e+06
China, Hong Kong SAR	India	23671
China, Hong Kong SAR	Indonesia	51080.3
China, Hong Kong SAR	Indonesia	997.838
China, Hong Kong SAR	Italy	12113
China, Hong Kong SAR	Italy	517445
China, Hong Kong SAR	Japan	21216373
China, Hong Kong SAR	Japan	481454
China, Hong Kong SAR	LAIA, nes	4949.07
China, Hong Kong SAR	Lao People's Dem. Rep.	523.236
China, Hong Kong SAR	Latvia	10769.7
China, Hong Kong SAR	Luxembourg	32553.5
China, Hong Kong SAR	Malaysia	76297
China, Hong Kong SAR	Malaysia	164938
China, Hong Kong SAR	Malta	4649.78
China, Hong Kong SAR	Mexico	179692
China, Hong Kong SAR	Nepal	6439.83
China, Hong Kong SAR	Netherlands	93201.3
China, Hong Kong SAR	New Zealand	34400.8
China, Hong Kong SAR	Norway	4203.95
China, Hong Kong SAR	Oceania, nes	28394.2
China, Hong Kong SAR	Other Asia, nes	9.61548e+06
China, Hong Kong SAR	Other Asia, nes	1.83009e+06
China, Hong Kong SAR	Panama	28801.2
China, Hong Kong SAR	Poland	231144
China, Hong Kong SAR	Portugal	23413.1
China, Hong Kong SAR	Qatar	76378.7
China, Hong Kong SAR	Rep. of Korea	3.80381e+06
China, Hong Kong SAR	Rep. of Korea	32074.1
China, Hong Kong SAR	Romania	19397.3
China, Hong Kong SAR	Russian Federation	184791
China, Hong Kong SAR	Saudi Arabia	1230.43
China, Hong Kong SAR	Singapore	1.71604e+06
China, Hong Kong SAR	Singapore	1.03309e+06
China, Hong Kong SAR	Slovakia	5126.32
China, Hong Kong SAR	South Africa	456780
China, Hong Kong SAR	South Africa	17023
China, Hong Kong SAR	Spain	134420
China, Hong Kong SAR	Sri Lanka	404020
China, Hong Kong SAR	Sweden	189441
China, Hong Kong SAR	Switzerland	1.56554e+06
China, Hong Kong SAR	Switzerland	4.18618e+06
China, Hong Kong SAR	Thailand	2.5607e+06
China, Hong Kong SAR	Thailand	283827
China, Hong Kong SAR	United Arab Emirates	518951
China, Hong Kong SAR	United Kingdom	580421
China, Hong Kong SAR	United Kingdom	2.03526e+06
China, Hong Kong SAR	USA	30683.9
China, Hong Kong SAR	USA	1.11777e+07
China, Hong Kong SAR	Viet Nam	171537
China, Hong Kong SAR	Zimbabwe	1567.52
Colombia	Belgium	462002
Colombia	Guatemala	5
Colombia	Honduras	1
Colombia	Spain	8
Colombia	USA	30617163
Costa Rica	Spain	252
Costa Rica	USA	98336
Côte d'Ivoire	Switzerland	1147.74
Croatia	Areas, nes	61
Croatia	Bunkers	113
Croatia	Germany	2026685
Croatia	Italy	7561
Croatia	Rep. of Korea	465
Croatia	Slovenia	18534
Czechia	Austria	189501
Czechia	Belgium	327982
Czechia	Bulgaria	114419
Czechia	Bulgaria	922
Czechia	Canada	74400
Czechia	Denmark	17223
Czechia	Denmark	509
Czechia	Egypt	46997
Czechia	Estonia	4851
Czechia	Estonia	209
Czechia	France	1083243
Czechia	Germany	52646515
Czechia	Germany	2045
Czechia	Greece	4405
Czechia	Hungary	28559704
Czechia	Hungary	26
Czechia	India	425270
Czechia	Iran	1747
Czechia	Israel	25366
Czechia	Italy	630968
Czechia	Italy	484
Czechia	Luxembourg	7164
Czechia	Mexico	751
Czechia	Netherlands	113289
Czechia	Poland	1195252
Czechia	Poland	379
Czechia	Portugal	6140
Czechia	Rep. of Korea	1316
Czechia	Romania	62336
Czechia	Romania	229
Czechia	Serbia	2954
Czechia	Singapore	9710
Czechia	Slovakia	4821006
Czechia	Slovakia	199328
Czechia	Slovenia	33241
Czechia	Spain	91684
Czechia	Switzerland	896199
Czechia	Thailand	95329
Czechia	Ukraine	137397
Czechia	United Kingdom	4927349
Czechia	USA	8338016
Denmark	Algeria	30
Denmark	Angola	97
Denmark	Austria	688
Denmark	Azerbaijan	345
Denmark	Belarus	1336
Denmark	Belgium	1178
Denmark	Brazil	2034
Denmark	Canada	1634
Denmark	Central African Rep.	404
Denmark	China	8325
Denmark	China, Hong Kong SAR	10498
Denmark	Colombia	416
Denmark	Cuba	186
Denmark	Czechia	938
Denmark	Dem. People's Rep. of Korea	809
Denmark	Estonia	642
Denmark	Eswatini	311
Denmark	Ethiopia	792
Denmark	Finland	5047
Denmark	France	118
Denmark	Germany	7247
Denmark	Germany	48498
Denmark	Greenland	98
Denmark	Indonesia	91
Denmark	Iran	404
Denmark	Ireland	148244
Denmark	Italy	53037
Denmark	Japan	10823
Denmark	Kazakhstan	1014
Denmark	Kyrgyzstan	662
Denmark	Lebanon	67
Denmark	Lithuania	18018
Denmark	Mauritania	1270
Denmark	Mongolia	223
Denmark	Morocco	1141
Denmark	Netherlands	796163
Denmark	Netherlands	16979
Denmark	Norway	756
Denmark	Norway	35460
Denmark	Other Asia, nes	149
Denmark	Pakistan	366
Denmark	Peru	193
Denmark	Philippines	347
Denmark	Poland	4863589
Denmark	Poland	40
Denmark	Portugal	256
Denmark	Rep. of Korea	414
Denmark	Rep. of Moldova	398
Denmark	Romania	431
Denmark	Russian Federation	3329
Denmark	Rwanda	219
Denmark	Serbia	1074
Denmark	Singapore	78
Denmark	Spain	56
Denmark	Sweden	605
Denmark	Sweden	1169
Denmark	Switzerland	7537
Denmark	Tajikistan	1481
Denmark	Thailand	6138
Denmark	Türkiye	1095
Denmark	Turkmenistan	488
Denmark	Ukraine	3128
Denmark	United Arab Emirates	44
Denmark	United Kingdom	7003
Denmark	USA	10887
Denmark	Uzbekistan	1021
Denmark	Viet Nam	128
Denmark	Zambia	168
Denmark	Zimbabwe	126
Dominican Rep.	Areas, nes	2769.41
Dominican Rep.	Curaçao	29.557
Dominican Rep.	Spain	247
Dominican Rep.	USA	45083.8
Dominican Rep.	USA	5292.62
Ecuador	USA	814
Estonia	Austria	5936
Estonia	Bulgaria	711
Estonia	Croatia	166
Estonia	Finland	11710
Estonia	Greece	182
Estonia	Latvia	119440
Estonia	Lithuania	180537
Estonia	Poland	11182280
Estonia	Portugal	346
Eswatini	Botswana	3.919
Eswatini	Rep. of Korea	3.919
Ethiopia	Turks and Caicos Isds	9831.77
Ethiopia	USA	5801.3
Fiji	Germany	187819
Fiji	New Zealand	28269.6
Finland	China, Hong Kong SAR	3168
Finland	Czechia	668886
Finland	Estonia	981
Finland	Germany	8481
Finland	Germany	347
Finland	Lao People's Dem. Rep.	83
Finland	Latvia	2117106
Finland	Norway	35
Finland	Russian Federation	18189
Finland	Sweden	2292
Finland	United Kingdom	47355402
France	Algeria	1346
France	Algeria	126
France	Australia	141
France	Austria	3521
France	Austria	57445
France	Bahrain	5869
France	Belgium	4771163
France	Belgium	39118
France	Brazil	1922
France	Canada	3356
France	Canada	43
France	China	173600
France	China	100102
France	China, Hong Kong SAR	176639
France	Colombia	73973
France	Costa Rica	153792
France	Côte d'Ivoire	5212
France	Croatia	186
France	Croatia	1078
France	Cyprus	589
France	Czechia	199526
France	Denmark	3185
France	Finland	507
France	Germany	11933538
France	Germany	188745
France	Greece	15777
France	Guam	2742
France	Hungary	33
France	India	30992
France	Ireland	179812
France	Italy	28422942
France	Italy	127473
France	Japan	2030
France	Lebanon	14047
France	Luxembourg	4468
France	Luxembourg	23568
France	Malaysia	141
France	Mali	54
France	Mauritius	3462
France	Mexico	20859
France	Mexico	307
France	Morocco	36486
France	Netherlands	695485
France	Netherlands	150243
France	New Caledonia	48048
France	Norway	1467
France	Other Asia, nes	29603
France	Panama	450
France	Poland	22641
France	Portugal	665552
France	Portugal	39992
France	Romania	213453
France	Russian Federation	19830
France	Russian Federation	2667
France	Saudi Arabia	88240
France	Senegal	938
France	Singapore	21737
France	Singapore	128876
France	Slovenia	258180
France	Spain	5888176
France	Spain	79183
France	Sri Lanka	15954
France	Sweden	15132868
France	Sweden	100
France	Switzerland	13680493
France	Switzerland	33075
France	Thailand	59064
France	Tunisia	2729
France	Türkiye	16044
France	Türkiye	51286
France	United Arab Emirates	26668
France	United Arab Emirates	200
France	United Kingdom	10029231
France	United Kingdom	4417784
France	USA	34236030
France	USA	302318
France	Viet Nam	152
French Polynesia	Australia	2722
French Polynesia	Austria	3249
French Polynesia	China, Hong Kong SAR	259895
French Polynesia	Denmark	25380
French Polynesia	France	309320
French Polynesia	Luxembourg	13331
French Polynesia	New Caledonia	41190
French Polynesia	Switzerland	6724
French Polynesia	Thailand	4986
French Polynesia	Tonga	293
French Polynesia	USA	534375
French Polynesia	Vanuatu	13404
French Polynesia	Viet Nam	9734
French Polynesia	Wallis and Futuna Isds	26002
Germany	Albania	1326.4
Germany	Argentina	1.28428e+07
Germany	Armenia	6537.75
Germany	Australia	8.50488e+06
Germany	Australia	887.226
Germany	Austria	4.67516e+07
Germany	Austria	867473
Germany	Azerbaijan	8689.27
Germany	Bahamas	998.129
Germany	Bahamas	87142.2
Germany	Bangladesh	1783.32
Germany	Belgium	1.7952e+08
Germany	Belgium	201323
Germany	Brazil	1.20772e+08
Germany	Brunei Darussalam	4067.93
Germany	Bulgaria	61579
Germany	Bulgaria	15555.3
Germany	Bunkers	43412
Germany	Bunkers	44348
Germany	Canada	1.50466e+07
Germany	Canada	22583.2
Germany	Chile	44173.9
Germany	China	1.42916e+08
Germany	China, Hong Kong SAR	3.61558e+07
Germany	China, Hong Kong SAR	41452.3
Germany	Colombia	9647.47
Germany	Costa Rica	2325.64
Germany	Croatia	1.68311e+06
Germany	Croatia	12924.7
Germany	Cyprus	18016.2
Germany	Czechia	4.79004e+06
Germany	Czechia	137664
Germany	Denmark	1.01626e+07
Germany	Denmark	55643.5
Germany	Dominican Rep.	276.149
Germany	Ecuador	3316.01
Germany	Egypt	20575.9
Germany	Equatorial Guinea	7663.41
Germany	Estonia	1.07568e+07
Germany	Estonia	11704.7
Germany	Ethiopia	614.404
Germany	Finland	1.08365e+06
Germany	Finland	44690.7
Germany	France	1.35206e+08
Germany	France	282163
Germany	Georgia	627.712
Germany	Ghana	1241.01
Germany	Greece	39675.6
Germany	Greece	3319.33
Germany	Hungary	451197
Germany	Hungary	18282.4
Germany	Iceland	104296
Germany	Iceland	2073.89
Germany	India	1.1434e+07
Germany	Iraq	547.862
Germany	Ireland	4.08088e+07
Germany	Ireland	89289.3
Germany	Israel	305156
Germany	Italy	6.17208e+07
Germany	Italy	72700.4
Germany	Japan	7.80811e+07
Germany	Japan	21728.2
Germany	Kazakhstan	1825.47
Germany	Kuwait	1408.47
Germany	Kyrgyzstan	4369.59
Germany	Latvia	8413.12
Germany	Latvia	781.868
Germany	Lebanon	18981.1
Germany	Lithuania	39448.3
Germany	Lithuania	1344.15
Germany	Luxembourg	825414
Germany	Luxembourg	33420.7
Germany	Malaysia	273500
Germany	Malaysia	2382.2
Germany	Malta	736.398
Germany	Malta	26671.1
Germany	Mauritius	3303.81
Germany	Mexico	1116.8
Germany	Mongolia	2682.75
Germany	Morocco	1094.62
Germany	Netherlands	1.56257e+07
Germany	Netherlands	220390
Germany	New Zealand	522985
Germany	Norway	1.45587e+07
Germany	Norway	107706
Germany	Oman	129847
Germany	Other Asia, nes	3.07699e+06
Germany	Pakistan	1010.33
Germany	Poland	3.30123e+06
Germany	Poland	72414.3
Germany	Portugal	169746
Germany	Portugal	6561.04
Germany	Qatar	374141
Germany	Qatar	29438.2
Germany	Rep. of Korea	2.97558e+07
Germany	Romania	480580
Germany	Romania	24152.5
Germany	Russian Federation	422462
Germany	Russian Federation	28161.7
Germany	San Marino	50661.7
Germany	Saudi Arabia	406343
Germany	Saudi Arabia	5988.78
Germany	Serbia	285927
Germany	Serbia	621.058
Germany	Singapore	6.59745e+07
Germany	Singapore	5498.58
Germany	Slovakia	3.65881e+07
Germany	Slovakia	31334.6
Germany	Slovenia	425141
Germany	Slovenia	43215.7
Germany	South Africa	1.45196e+07
Germany	Spain	1.04191e+07
Germany	Spain	24964.3
Germany	Sri Lanka	1158.94
Germany	Sweden	4.40552e+06
Germany	Sweden	18204.8
Germany	Switzerland	1.286e+08
Germany	Switzerland	1.78313e+06
Germany	Thailand	8.79395e+06
Germany	Thailand	3544.47
Germany	Tunisia	3271.65
Germany	Türkiye	393626
Germany	Türkiye	1604.77
Germany	Ukraine	619488
Germany	Ukraine	3235.05
Germany	United Arab Emirates	355279
Germany	United Arab Emirates	1796.63
Germany	United Kingdom	1.02841e+08
Germany	United Kingdom	490765
Germany	USA	2.298e+08
Germany	USA	164251
Germany	Viet Nam	213632
Greece	Austria	222
Greece	Belgium	2
Greece	Bulgaria	42
Greece	Cyprus	15995
Greece	Cyprus	993
Greece	France	1889
Greece	Germany	39964
Greece	Serbia	1775
Greece	Spain	264
Greece	United Kingdom	27
Hungary	Austria	5362
Hungary	Belgium	742453
Hungary	Czechia	797646
Hungary	Germany	363743
Hungary	Russian Federation	53
Hungary	Slovakia	3
Hungary	Slovenia	5
Hungary	United Kingdom	190586
India	Argentina	1886
India	Bangladesh	260
India	Canada	83
India	China, Hong Kong SAR	2142
India	Cyprus	46
India	Germany	265
India	Germany	10027
India	Greece	140
India	Honduras	16283
India	Israel	20163
India	Italy	182178
India	Mauritius	277
India	Mexico	1025
India	Nicaragua	1719
India	Singapore	5479
India	South Africa	21092
India	United Arab Emirates	1400
India	United Arab Emirates	182
India	United Kingdom	33507
India	United Kingdom	3492
India	USA	50341
India	USA	11424
Indonesia	Japan	30500
Indonesia	Singapore	7612
Ireland	Argentina	1617.67
Ireland	China	32463.2
Ireland	France	6965.52
Ireland	Germany	163153
Ireland	Germany	3388.45
Ireland	Singapore	3820.05
Ireland	Spain	12569.7
Ireland	Spain	394.987
Ireland	Thailand	369.468
Ireland	United Kingdom	648103
Ireland	United Kingdom	41245
Ireland	USA	4.14981e+06
Ireland	USA	15998.1
Israel	China, Hong Kong SAR	15000
Israel	USA	131000
Italy	Albania	5003.66
Italy	Australia	129809
Italy	Australia	28277.2
Italy	Austria	613027
Italy	Austria	4349.66
Italy	Belgium	2.44224e+07
Italy	Belgium	2405.39
Italy	Bulgaria	600882
Italy	Bulgaria	3685.68
Italy	Canada	127035
Italy	China	3694.55
Italy	China	7759.32
Italy	China, Hong Kong SAR	2.69785e+06
Italy	China, Hong Kong SAR	224033
Italy	Colombia	4527.01
Italy	Congo	4988.14
Italy	Croatia	445.607
Italy	Croatia	309.265
Italy	Cyprus	60240.1
Italy	Cyprus	4186.71
Italy	Czechia	2.23215e+07
Italy	Czechia	1958.67
Italy	Denmark	1595.1
Italy	Denmark	270.468
Italy	Egypt	8781.34
Italy	Estonia	855.743
Italy	Finland	83576.8
Italy	France	3.10348e+07
Italy	France	173128
Italy	Germany	3.95945e+07
Italy	Germany	2825.5
Italy	Greece	2.21877e+06
Italy	Greece	31420.8
Italy	Hungary	409863
Italy	Hungary	16.627
Italy	Iceland	12726.4
Italy	India	2.12583e+06
Italy	Indonesia	49567.7
Italy	Iran	64373.6
Italy	Ireland	123950
Italy	Ireland	35465.7
Italy	Israel	14792.6
Italy	Japan	2633.74
Italy	Japan	12418.2
Italy	Latvia	446.715
Italy	Latvia	1496.44
Italy	Lithuania	2.4736e+06
Italy	Lithuania	1196.05
Italy	Luxembourg	1400
Italy	Malta	498580
Italy	Malta	692.797
Italy	Mexico	540571
Italy	Netherlands	5.03514e+06
Italy	Netherlands	2286.78
Italy	New Caledonia	4612.36
Italy	Norway	172907
Italy	Other Asia, nes	335770
Italy	Peru	19234.3
Italy	Poland	1.87298e+07
Italy	Poland	2362.16
Italy	Portugal	54920.5
Italy	Portugal	3924
Italy	Rep. of Korea	2039.59
Italy	Romania	203594
Italy	Romania	5958.05
Italy	Russian Federation	39633.5
Italy	Saudi Arabia	186032
Italy	Serbia	14421.3
Italy	Seychelles	2893.12
Italy	Singapore	578771
Italy	Slovakia	152256
Italy	Slovakia	1816.79
Italy	Slovenia	6629.79
Italy	Slovenia	14000
Italy	South Africa	195207
Italy	Spain	3.57224e+07
Italy	Spain	16330.1
Italy	Sweden	169134
Italy	Switzerland	1.88367e+08
Italy	Switzerland	1.37152e+06
Italy	Thailand	520231
Italy	Thailand	2247.99
Italy	Türkiye	244449
Italy	Türkiye	28973.3
Italy	United Arab Emirates	34866
Italy	United Kingdom	1.31752e+08
Italy	United Kingdom	109594
Italy	USA	4.81948e+08
Italy	USA	23344.5
Italy	Viet Nam	119908
Jamaica	Barbados	107
Jamaica	Canada	7282
Japan	Australia	386350
Japan	Australia	11495
Japan	Austria	18507740
Japan	Belgium	531185
Japan	Bulgaria	21536
Japan	Canada	718365
Japan	Canada	1768
Japan	China	125932724
Japan	China	49733
Japan	China, Hong Kong SAR	296906529
Japan	China, Hong Kong SAR	11376892
Japan	China, Macao SAR	1975
Japan	Czechia	8876
Japan	Fiji	153074
Japan	France	2250915
Japan	France	47708
Japan	Germany	10821229
Japan	Germany	35552
Japan	India	5302116
Japan	Indonesia	42535
Japan	Ireland	4297
Japan	Italy	75153
Japan	Italy	27742
Japan	Malaysia	62073887
Japan	Malaysia	65608
Japan	Malta	74698
Japan	Netherlands	15735
Japan	New Zealand	2463540
Japan	Oman	2132
Japan	Other Asia, nes	80251721
Japan	Other Asia, nes	563803
Japan	Philippines	1214758
Japan	Portugal	126224
Japan	Rep. of Korea	41463653
Japan	Rep. of Korea	12272
Japan	Singapore	104325133
Japan	Singapore	188122
Japan	South Africa	11355
Japan	Switzerland	24692377
Japan	Switzerland	22619
Japan	Thailand	34708197
Japan	Thailand	96598
Japan	Türkiye	33329
Japan	United Arab Emirates	5705135
Japan	United Kingdom	20888491
Japan	United Kingdom	197344
Japan	USA	34541454
Japan	USA	257638
Japan	Viet Nam	11350315
Kazakhstan	Kyrgyzstan	95
Kazakhstan	Switzerland	3789664
Kenya	Ghana	10.16
Kenya	Somalia	304.97
Kenya	United Rep. of Tanzania	304.7
Kuwait	United Arab Emirates	980.597
Latvia	Estonia	76312.9
Latvia	Lithuania	18257
Latvia	Russian Federation	24.399
Latvia	United Kingdom	587734
Lebanon	Côte d'Ivoire	575.52
Lithuania	France	52
Lithuania	Poland	1498
Lithuania	Russian Federation	55953
Lithuania	Ukraine	28679
Luxembourg	Belgium	221
Luxembourg	Canada	4
Luxembourg	China	7
Luxembourg	France	18077
Luxembourg	Germany	196564
Luxembourg	Germany	325
Luxembourg	Italy	556
Malaysia	China, Hong Kong SAR	92164
Malaysia	India	1994
Malaysia	Japan	1043723
Malaysia	Rep. of Korea	1126584
Malaysia	Singapore	1778
Malaysia	Singapore	15417
Malaysia	USA	6442
Malta	Italy	502
Mauritius	Romania	4358
Mauritius	Seychelles	2273
Mauritius	South Africa	7849
Mauritius	South Africa	964
Mexico	USA	2560832
Mongolia	Japan	6789
Nepal	USA	421
Netherlands	Australia	4910.03
Netherlands	Austria	97855.6
Netherlands	Austria	3671.15
Netherlands	Bahrain	1676.97
Netherlands	Belgium	2.59825e+06
Netherlands	Belgium	41322.1
Netherlands	Bulgaria	8949.41
Netherlands	Bulgaria	103.147
Netherlands	Canada	1894.36
Netherlands	China	144204
Netherlands	China, Hong Kong SAR	106241
Netherlands	Croatia	3467.08
Netherlands	Croatia	59.892
Netherlands	Cuba	22760
Netherlands	Curaçao	5681.97
Netherlands	Cyprus	83402.8
Netherlands	Cyprus	173.021
Netherlands	Czechia	70419.6
Netherlands	Czechia	2309.17
Netherlands	Denmark	146048
Netherlands	Denmark	1134.62
Netherlands	Estonia	7656.18
Netherlands	Estonia	109.802
Netherlands	Finland	31922.4
Netherlands	Finland	676.557
Netherlands	France	299892
Netherlands	France	28297.8
Netherlands	Germany	1.14404e+07
Netherlands	Germany	36437.6
Netherlands	Greece	17850
Netherlands	Greece	482.463
Netherlands	Hungary	22190
Netherlands	Hungary	1501.73
Netherlands	India	4750.32
Netherlands	Ireland	20904.5
Netherlands	Ireland	2694.03
Netherlands	Italy	213547
Netherlands	Italy	1628.17
Netherlands	Japan	15467.6
Netherlands	Kuwait	675.448
Netherlands	Latvia	5162.9
Netherlands	Latvia	79.856
Netherlands	Lithuania	71064
Netherlands	Lithuania	150.839
Netherlands	Luxembourg	81575
Netherlands	Luxembourg	665.466
Netherlands	Malta	2106.2
Netherlands	Malta	97.602
Netherlands	Other Europe, nes	1409.68
Netherlands	Other Europe, nes	45.473
Netherlands	Poland	150467
Netherlands	Poland	2045.2
Netherlands	Portugal	13050.9
Netherlands	Portugal	1080.27
Netherlands	Romania	32506.9
Netherlands	Romania	344.933
Netherlands	Russian Federation	3.327
Netherlands	Slovakia	23490.9
Netherlands	Slovakia	110.911
Netherlands	Slovenia	7332.32
Netherlands	Slovenia	255.095
Netherlands	South Africa	216.276
Netherlands	Spain	304990
Netherlands	Spain	10128.4
Netherlands	Sweden	55768.3
Netherlands	Sweden	1111.33
Netherlands	Switzerland	10004.2
Netherlands	Switzerland	1610.43
Netherlands	United Kingdom	3.14656e+06
Netherlands	United Kingdom	12702.6
Netherlands	USA	1.109
Netherlands	USA	10993.5
New Zealand	Australia	480820
New Zealand	Australia	33833.7
New Zealand	Cook Isds	2651.33
New Zealand	Fiji	80023.2
New Zealand	Papua New Guinea	18342.5
New Zealand	Thailand	387888
New Zealand	USA	2174.94
North Macedonia	Montenegro	9377.02
Norway	Estonia	520.377
Norway	Germany	3.34328e+07
Norway	Japan	4.17455e+07
Norway	Spain	2500.74
Norway	Sweden	1.39013e+06
Norway	Switzerland	23331.4
Norway	United Kingdom	7.43122e+07
Norway	USA	1.03935e+08
Oman	United Arab Emirates	23906.4
Other Asia, nes	Australia	3046
Other Asia, nes	Australia	2645
Other Asia, nes	Canada	1732
Other Asia, nes	China	2464745
Other Asia, nes	China	100157
Other Asia, nes	China, Hong Kong SAR	12104612
Other Asia, nes	China, Hong Kong SAR	97544
Other Asia, nes	France	6651
Other Asia, nes	Germany	81353372
Other Asia, nes	India	12401
Other Asia, nes	Iran	300344
Other Asia, nes	Japan	76754954
Other Asia, nes	Japan	121685
Other Asia, nes	Malaysia	37803444
Other Asia, nes	Rep. of Korea	765476
Other Asia, nes	Singapore	78191972
Other Asia, nes	South Africa	1957
Other Asia, nes	Switzerland	3551386
Other Asia, nes	Switzerland	5515
Other Asia, nes	United Kingdom	2315908
Other Asia, nes	USA	19965745
Other Asia, nes	USA	14482
Paraguay	Italy	179694
Peru	Brazil	151347
Peru	Mexico	66.64
Peru	Spain	248.73
Peru	USA	204.75
Philippines	China, Hong Kong SAR	823900
Philippines	Germany	1140
Philippines	Japan	603840
Philippines	USA	120934
Poland	Areas, nes	39650
Poland	Australia	3032
Poland	Belarus	19
Poland	Belgium	200458
Poland	Bunkers	130060
Poland	Canada	496
Poland	China	1360
Poland	China, Hong Kong SAR	19837
Poland	Czechia	1038371
Poland	Czechia	66
Poland	Denmark	16058
Poland	Georgia	79
Poland	Germany	1252591
Poland	Germany	635
Poland	Hungary	81
Poland	India	450
Poland	India	52
Poland	Israel	88
Poland	Italy	9491795
Poland	Italy	678
Poland	Japan	1044
Poland	Japan	523
Poland	Kazakhstan	158
Poland	Kuwait	180
Poland	Latvia	3620714
Poland	Lebanon	117
Poland	Lithuania	133
Poland	Netherlands	7169953
Poland	Norway	53
Poland	Other Asia, nes	87
Poland	Romania	22842
Poland	Romania	253
Poland	Russian Federation	46138
Poland	Russian Federation	5655
Poland	Serbia	53
Poland	Singapore	246
Poland	Spain	10943
Poland	Switzerland	146
Poland	Thailand	49
Poland	Türkiye	172
Poland	United Arab Emirates	215
Poland	United Kingdom	4546743
Poland	USA	12682
Portugal	Australia	234.015
Portugal	Belgium	291546
Portugal	France	74090.8
Portugal	Germany	161256
Portugal	Ireland	199369
Portugal	Italy	913104
Portugal	Spain	6.70913e+06
Portugal	Spain	9726.6
Portugal	USA	20734.2
Rep. of Korea	Australia	545
Rep. of Korea	China	269408
Rep. of Korea	China	3000
Rep. of Korea	China, Hong Kong SAR	1258
Rep. of Korea	China, Hong Kong SAR	8800
Rep. of Korea	Germany	2864527
Rep. of Korea	India	5663
Rep. of Korea	Indonesia	209188
Rep. of Korea	Israel	23254
Rep. of Korea	Japan	80439891
Rep. of Korea	Japan	4275
Rep. of Korea	Other Asia, nes	7434904
Rep. of Korea	Saudi Arabia	228
Rep. of Korea	Spain	320
Rep. of Korea	Thailand	7198
Rep. of Korea	Thailand	4732
Rep. of Korea	United Kingdom	8179229
Rep. of Korea	USA	192648596
Rep. of Korea	USA	2275
Rep. of Korea	Viet Nam	137593
Russian Federation	Armenia	1255
Russian Federation	Australia	13
Russian Federation	Belarus	13202525
Russian Federation	Belarus	3016
Russian Federation	China, Hong Kong SAR	46208136
Russian Federation	Czechia	4415
Russian Federation	Germany	139299093
Russian Federation	Germany	112
Russian Federation	India	27071
Russian Federation	Israel	224
Russian Federation	Italy	182336400
Russian Federation	Italy	19
Russian Federation	Japan	138922564
Russian Federation	Kazakhstan	1686439
Russian Federation	Kazakhstan	1041
Russian Federation	Kuwait	9
Russian Federation	Kyrgyzstan	90
Russian Federation	Latvia	227864
Russian Federation	Latvia	26
Russian Federation	Morocco	9
Russian Federation	Netherlands	7
Russian Federation	Poland	5071
Russian Federation	Rep. of Moldova	8154
Russian Federation	Spain	17
Russian Federation	Switzerland	99925125
Russian Federation	Türkiye	8910
Russian Federation	Turkmenistan	156
Russian Federation	Ukraine	264405
Russian Federation	United Arab Emirates	12219
Russian Federation	United Kingdom	69560097
Russian Federation	USA	288310114
Rwanda	Kenya	352.745
Saint Lucia	USA	29516
Saudi Arabia	Italy	38703.6
Senegal	Rwanda	68
Serbia	Germany	122546
Serbia	Switzerland	452442
Singapore	Australia	319156
Singapore	Australia	382047
Singapore	China	19525.3
Singapore	China	5685.53
Singapore	China, Hong Kong SAR	8.62968e+06
Singapore	China, Hong Kong SAR	582566
Singapore	El Salvador	2152.09
Singapore	France	1378.44
Singapore	France	872.626
Singapore	Germany	2.84012e+07
Singapore	Indonesia	65575.8
Singapore	Indonesia	25871.6
Singapore	Italy	208769
Singapore	Japan	4.81887e+07
Singapore	Japan	219697
Singapore	Malaysia	3.00455e+06
Singapore	Malaysia	196804
Singapore	Myanmar	1703.04
Singapore	Other Asia, nes	4.10249e+06
Singapore	Other Asia, nes	328.963
Singapore	Philippines	8686.96
Singapore	Rep. of Korea	298.396
Singapore	Rep. of Korea	4510.14
Singapore	Spain	12987.5
Singapore	Sri Lanka	972.334
Singapore	Switzerland	5716.83
Singapore	Thailand	236923
Singapore	Thailand	62388.8
Singapore	United Kingdom	2.34838e+06
Singapore	USA	3.37143e+07
Singapore	USA	19649
Singapore	Viet Nam	92643.2
Slovakia	Czechia	3.29321e+07
Slovakia	Czechia	376.125
Slovakia	Germany	91302.9
Slovakia	Germany	27.738
Slovakia	Hungary	177988
Slovakia	Italy	189017
Slovakia	Poland	322876
Slovakia	Slovenia	1698.66
Slovakia	United Kingdom	1.46116e+07
Slovakia	USA	89896.1
Slovakia	USA	1194.95
Slovenia	Austria	878
Slovenia	Austria	2969
Slovenia	Bosnia Herzegovina	12760
Slovenia	Bulgaria	1347
Slovenia	Canada	662
Slovenia	Croatia	154
Slovenia	Croatia	37350
Slovenia	Czechia	842
Slovenia	France	2641
Slovenia	Germany	156973
Slovenia	Montenegro	279
Slovenia	Serbia	3887
Slovenia	Serbia	14674
Slovenia	United Kingdom	289455
South Africa	Angola	2712.77
South Africa	Belgium	132.378
South Africa	Botswana	135.826
South Africa	Botswana	7260.56
South Africa	Brazil	44.048
South Africa	China	2.27039e+08
South Africa	China, Hong Kong SAR	7.76917e+08
South Africa	Czechia	693123
South Africa	Dem. Rep. of the Congo	2822.26
South Africa	Eswatini	816.683
South Africa	France	629.285
South Africa	Germany	7.09203e+08
South Africa	Ghana	1086.38
South Africa	India	2.00603e+07
South Africa	Italy	9.89099e+07
South Africa	Japan	1.77012e+09
South Africa	Kenya	1551.85
South Africa	Kenya	3281.23
South Africa	Lesotho	203.7
South Africa	Mauritius	9029.67
South Africa	Mauritius	1073.76
South Africa	Mozambique	844.742
South Africa	Namibia	1355.91
South Africa	Namibia	20104.4
South Africa	Norway	1.70372e+06
South Africa	Other Asia, nes	2.61867e+06
South Africa	Rep. of Korea	3.91509e+07
South Africa	Switzerland	4.57323e+08
South Africa	United Kingdom	1.39325e+09
South Africa	United Rep. of Tanzania	875.073
South Africa	USA	1.29245e+09
South Africa	Zambia	27.745
South Africa	Zambia	2697.64
South Africa	Zimbabwe	2200.03
Spain	Albania	33.761
Spain	Andorra	3099.5
Spain	Andorra	47285.9
Spain	Areas, nes	7369.17
Spain	Argentina	188.487
Spain	Aruba	359.234
Spain	Australia	8869.97
Spain	Bahamas	148.461
Spain	Bahrain	671.9
Spain	Bermuda	131.719
Spain	Bolivia (Plurinational State of)	37.697
Spain	Brazil	441.281
Spain	Bulgaria	4672.49
Spain	Bulgaria	77.39
Spain	Chile	21930
Spain	China	1271.74
Spain	China, Hong Kong SAR	44.405
Spain	Colombia	2022.74
Spain	Croatia	2283.88
Spain	Cuba	94.243
Spain	Czechia	104.222
Spain	Dominican Rep.	1084.88
Spain	Ecuador	9007.32
Spain	Egypt	65.416
Spain	France	7.53453e+06
Spain	France	3356.63
Spain	Germany	953698
Spain	Germany	414.671
Spain	Gibraltar	771.033
Spain	Greece	13719.4
Spain	Guatemala	19.98
Spain	Italy	1.42914e+07
Spain	Italy	40235.3
Spain	Kuwait	888.105
Spain	Latvia	203.976
Spain	Libya	1405.12
Spain	Malaysia	335.95
Spain	Mexico	107838
Spain	Montenegro	251.131
Spain	Morocco	467.88
Spain	Panama	4079.11
Spain	Peru	447.745
Spain	Poland	14579.9
Spain	Portugal	6.33441e+06
Spain	Portugal	95145
Spain	Rep. of Korea	408.018
Spain	Romania	974.1
Spain	Russian Federation	441.281
Spain	Saudi Arabia	188314
Spain	Singapore	41.024
Spain	Slovakia	2.63917e+06
Spain	Slovakia	2149.3
Spain	Switzerland	178984
Spain	Switzerland	3936.27
Spain	Tunisia	87.591
Spain	Türkiye	325.75
Spain	United Arab Emirates	1748.66
Spain	United Kingdom	3.73937e+07
Spain	United Kingdom	290.491
Spain	Uruguay	99.787
Spain	USA	1.109
Spain	USA	10560.4
Spain	Venezuela	351.439
Sweden	Australia	355.792
Sweden	Belgium	830.182
Sweden	Canada	1778.96
Sweden	China	31784.1
Sweden	Czechia	31309.7
Sweden	Denmark	43525.2
Sweden	Denmark	15061.9
Sweden	Estonia	355.792
Sweden	Faeroe Isds	237.195
Sweden	Finland	375242
Sweden	Finland	24431.1
Sweden	France	1.54577e+07
Sweden	Germany	89066.6
Sweden	Germany	8894.81
Sweden	Greenland	118.597
Sweden	Iran	2371.95
Sweden	Ireland	711.584
Sweden	Malaysia	27277.4
Sweden	Netherlands	237.195
Sweden	Norway	118953
Sweden	Norway	108398
Sweden	Poland	43762.4
Sweden	Slovakia	16722.2
Sweden	Spain	237.195
Sweden	Switzerland	92861.8
Sweden	United Kingdom	118.597
Sweden	USA	1541.77
Sweden	USA	355.792
Switzerland	Aruba	8184.19
Switzerland	Australia	4.97421e+06
Switzerland	Austria	1.10551e+06
Switzerland	Austria	82.018
Switzerland	Bahrain	21838.7
Switzerland	Belgium	2.30307e+07
Switzerland	Belgium	3.115
Switzerland	Brazil	710.134
Switzerland	Canada	6.09219e+07
Switzerland	Chile	3921.31
Switzerland	China	9.9644e+06
Switzerland	China, Hong Kong SAR	1.61166e+08
Switzerland	China, Hong Kong SAR	1.06436e+07
Switzerland	Colombia	1142.03
Switzerland	Czechia	1.30021e+06
Switzerland	Czechia	9804.83
Switzerland	Denmark	887826
Switzerland	Finland	458023
Switzerland	Finland	2512.46
Switzerland	France	2.11664e+07
Switzerland	France	39098.9
Switzerland	Germany	1.48308e+08
Switzerland	Germany	433074
Switzerland	Greece	45443.4
Switzerland	Hungary	24523.5
Switzerland	India	721761
Switzerland	India	32030.8
Switzerland	Iran	1384.97
Switzerland	Ireland	2640.16
Switzerland	Israel	336675
Switzerland	Italy	1.37039e+08
Switzerland	Italy	1.64483e+06
Switzerland	Japan	9.84581e+07
Switzerland	Lebanon	184563
Switzerland	Luxembourg	1.56784e+06
Switzerland	Malaysia	2.23765e+06
Switzerland	Mauritius	16562.5
Switzerland	Mexico	301.08
Switzerland	Netherlands	1.21296e+06
Switzerland	Norway	46200.2
Switzerland	Oman	268.896
Switzerland	Other Asia, nes	2.66033e+06
Switzerland	Pakistan	7407.61
Switzerland	Poland	24582.7
Switzerland	Portugal	1303.99
Switzerland	Qatar	2.53478e+06
Switzerland	Rep. of Korea	2.97724e+07
Switzerland	Russian Federation	300326
Switzerland	San Marino	1.44092e+06
Switzerland	Saudi Arabia	217781
Switzerland	Singapore	350808
Switzerland	Singapore	1.03821e+06
Switzerland	South Africa	623745
Switzerland	Spain	792099
Switzerland	Spain	28242.4
Switzerland	Sweden	565066
Switzerland	Thailand	115899
Switzerland	Tunisia	11168
Switzerland	Türkiye	28259
Switzerland	Ukraine	1.10632e+06
Switzerland	United Arab Emirates	7.92903e+06
Switzerland	United Arab Emirates	961293
Switzerland	United Kingdom	1.89123e+07
Switzerland	United Kingdom	1.34167e+06
Switzerland	USA	1.01388e+08
Switzerland	USA	3.40814e+06
Switzerland	Uzbekistan	181041
Switzerland	Viet Nam	565.823
Thailand	Australia	1279.48
Thailand	Australia	689702
Thailand	Austria	986995
Thailand	Belgium	99.99
Thailand	Cambodia	435.52
Thailand	China	0.98
Thailand	China	283.55
Thailand	China, Hong Kong SAR	124609
Thailand	China, Hong Kong SAR	522991
Thailand	Denmark	442.18
Thailand	France	9.99
Thailand	France	3956.62
Thailand	Germany	36888.4
Thailand	Germany	1401.11
Thailand	India	0.77
Thailand	Indonesia	2.24
Thailand	Indonesia	18398.9
Thailand	Israel	2147.99
Thailand	Italy	40047.2
Thailand	Japan	292131
Thailand	Japan	195471
Thailand	Kazakhstan	493.54
Thailand	Lao People's Dem. Rep.	460.21
Thailand	Malaysia	257.63
Thailand	Myanmar	1742.98
Thailand	Netherlands	76.14
Thailand	New Caledonia	3889.9
Thailand	Other Asia, nes	42952.4
Thailand	Portugal	2.48
Thailand	Qatar	3039.99
Thailand	Russian Federation	59.99
Thailand	Singapore	17014.8
Thailand	Singapore	100961
Thailand	Switzerland	569.13
Thailand	Türkiye	6569.99
Thailand	United Arab Emirates	16500
Thailand	United Arab Emirates	1.09606e+06
Thailand	United Kingdom	191523
Thailand	United Kingdom	103214
Thailand	USA	73945
Thailand	USA	147757
Thailand	Viet Nam	1.99
Türkiye	Azerbaijan	1839
Türkiye	Bulgaria	122
Türkiye	Cyprus	2066
Türkiye	Germany	35811
Türkiye	Hungary	353
Türkiye	Iraq	243
Türkiye	Israel	250
Türkiye	Latvia	1335
Türkiye	Switzerland	2833557
Türkiye	Syria	1676
Türkiye	United Kingdom	2039575
Türkiye	USA	296707
Türkiye	USA	270
Türkiye	Uzbekistan	13809
Ukraine	Areas, nes	71
Ukraine	Germany	45274
Ukraine	Russian Federation	266050
United Arab Emirates	Algeria	816.882
United Arab Emirates	Bangladesh	550431
United Arab Emirates	Belgium	15083.7
United Arab Emirates	India	4.13875e+06
United Arab Emirates	Indonesia	63875.9
United Arab Emirates	Iran	167425
United Arab Emirates	Iraq	1.30536e+07
United Arab Emirates	Malaysia	6914.38
United Arab Emirates	Netherlands	743924
United Arab Emirates	Oman	860.449
United Arab Emirates	Qatar	3898.16
United Arab Emirates	Saudi Arabia	1.29555e+07
United Arab Emirates	Singapore	5.4392e+06
United Arab Emirates	Sri Lanka	1753.57
United Arab Emirates	Sweden	100362
United Arab Emirates	Switzerland	120863
United Arab Emirates	Türkiye	52481.5
United Arab Emirates	United Kingdom	1.49469e+07
United Arab Emirates	USA	30502.3
United Arab Emirates	Yemen	1189.92
United Kingdom	Argentina	52960735
United Kingdom	Armenia	7313
United Kingdom	Australia	25028593
United Kingdom	Australia	5177
United Kingdom	Austria	10878277
United Kingdom	Austria	19304
United Kingdom	Belgium	20292101
United Kingdom	Belgium	2097
United Kingdom	Brazil	1598785
United Kingdom	Bulgaria	1691688
United Kingdom	Bulgaria	6527
United Kingdom	Canada	20293
United Kingdom	Canada	5413
United Kingdom	Chile	1293759
United Kingdom	China	227416793
United Kingdom	China, Hong Kong SAR	774889674
United Kingdom	China, Hong Kong SAR	3256730
United Kingdom	China, Macao SAR	15788
United Kingdom	Colombia	2825
United Kingdom	Croatia	261
United Kingdom	Cyprus	3893
United Kingdom	Czechia	5522068
United Kingdom	Czechia	25808
United Kingdom	Denmark	1892908
United Kingdom	Denmark	1521
United Kingdom	Egypt	2678615
United Kingdom	Estonia	775226
United Kingdom	Estonia	16653
United Kingdom	Finland	1661592
United Kingdom	Finland	12095
United Kingdom	France	15204529
United Kingdom	France	271419
United Kingdom	Georgia	2148002
United Kingdom	Germany	874833824
United Kingdom	Germany	83474
United Kingdom	Gibraltar	1744
United Kingdom	Greece	7019
United Kingdom	Greece	153
United Kingdom	Hungary	9001
United Kingdom	India	92393689
United Kingdom	Ireland	91394806
United Kingdom	Ireland	233714
United Kingdom	Israel	1018082
United Kingdom	Israel	1882
United Kingdom	Italy	98498832
United Kingdom	Italy	69126
United Kingdom	Japan	361753209
United Kingdom	Japan	90324
United Kingdom	Jordan	22006
United Kingdom	Kazakhstan	17362
United Kingdom	Kuwait	1299
United Kingdom	Latvia	1552
United Kingdom	Latvia	31465
United Kingdom	Lithuania	2749071
United Kingdom	Lithuania	231
United Kingdom	Luxembourg	567969
United Kingdom	Luxembourg	63
United Kingdom	Malaysia	44772
United Kingdom	Maldives	1827
United Kingdom	Malta	2742
United Kingdom	Malta	515
United Kingdom	Mexico	403557
United Kingdom	Mexico	1643
United Kingdom	Netherlands	4191226
United Kingdom	Netherlands	56766
United Kingdom	New Zealand	12176
United Kingdom	Nigeria	1529
United Kingdom	North Macedonia	749350338
United Kingdom	Norway	3123623
United Kingdom	Norway	1840
United Kingdom	Other Asia, nes	10350153
United Kingdom	Other Asia, nes	2608
United Kingdom	Pakistan	1100794
United Kingdom	Poland	16658987
United Kingdom	Portugal	32858
United Kingdom	Portugal	174
United Kingdom	Qatar	47591
United Kingdom	Qatar	171899
United Kingdom	Rep. of Korea	55151768
United Kingdom	Romania	10629930
United Kingdom	Romania	29474
United Kingdom	Russian Federation	18527
United Kingdom	Saudi Arabia	3825
United Kingdom	Saudi Arabia	1428
United Kingdom	Serbia	1842
United Kingdom	Singapore	479827
United Kingdom	Singapore	2084
United Kingdom	Slovakia	423645
United Kingdom	Slovakia	5896
United Kingdom	Slovenia	296417
United Kingdom	South Africa	30438491
United Kingdom	South Africa	1313
United Kingdom	Spain	6737514
United Kingdom	Spain	273137
United Kingdom	Sri Lanka	2744
United Kingdom	Sweden	1660080
United Kingdom	Sweden	2761
United Kingdom	Switzerland	454309396
United Kingdom	Switzerland	1215867
United Kingdom	Thailand	277681
United Kingdom	Thailand	72749
United Kingdom	Tunisia	654306
United Kingdom	Türkiye	2055413
United Kingdom	Ukraine	1481609
United Kingdom	United Arab Emirates	4208168
United Kingdom	United Arab Emirates	22193
United Kingdom	Uruguay	3491
United Kingdom	USA	438539273
United Kingdom	USA	311205
United Rep. of Tanzania	Comoros	5
USA	Antigua and Barbuda	31328
USA	Antigua and Barbuda	3054
USA	Argentina	5583825
USA	Aruba	18156
USA	Australia	8374190
USA	Australia	1204141
USA	Austria	108722
USA	Austria	7102
USA	Bahamas	9793
USA	Bahamas	21203
USA	Bahrain	11880
USA	Barbados	65370
USA	Belgium	27178249
USA	Bermuda	107292
USA	Bolivia (Plurinational State of)	5716
USA	Botswana	5645
USA	Brazil	46065748
USA	Brazil	3510
USA	Cambodia	34612
USA	Canada	184725211
USA	Canada	2737568
USA	Cayman Isds	20853
USA	Cayman Isds	82417
USA	Chile	74168
USA	China	119901711
USA	China	9611
USA	China, Hong Kong SAR	25846352
USA	China, Hong Kong SAR	2716512
USA	Colombia	849965
USA	Colombia	10376
USA	Costa Rica	949228
USA	Curaçao	8624
USA	Czechia	971349
USA	Denmark	597755
USA	Dominican Rep.	312374
USA	Dominican Rep.	3593
USA	Egypt	6000
USA	Estonia	31567
USA	Finland	105813
USA	France	7154148
USA	France	99430
USA	French Polynesia	5400
USA	Germany	329072697
USA	Germany	73313
USA	Greece	10134
USA	Grenada	2978
USA	Haiti	2693
USA	Honduras	7208
USA	Iceland	5177
USA	India	40111807
USA	India	5665
USA	Iraq	3656
USA	Ireland	24750893
USA	Israel	7493565
USA	Italy	155598451
USA	Italy	277059
USA	Jamaica	2753
USA	Japan	219795418
USA	Japan	3483720
USA	Kuwait	21108
USA	Lao People's Dem. Rep.	2049638
USA	Lebanon	26042
USA	Luxembourg	56836379
USA	Malaysia	200408
USA	Mexico	15547811
USA	Mexico	235087
USA	Netherlands	3770420
USA	Netherlands	392674
USA	New Zealand	727983
USA	Norway	643929
USA	Other Asia, nes	24631087
USA	Other Asia, nes	16720
USA	Panama	30621
USA	Peru	152312
USA	Philippines	135894
USA	Poland	81403
USA	Rep. of Korea	367812011
USA	Romania	30312
USA	Russian Federation	598479
USA	Saint Lucia	5357
USA	Saudi Arabia	820159
USA	Singapore	72747230
USA	Singapore	9891
USA	Sint Maarten	964271
USA	Slovakia	825235
USA	South Africa	37040
USA	Spain	232879
USA	Sweden	128013
USA	Sweden	2800
USA	Switzerland	85394709
USA	Switzerland	292414
USA	Thailand	7384586
USA	Thailand	147967
USA	Türkiye	248226
USA	United Arab Emirates	3204940
USA	United Arab Emirates	243447
USA	United Kingdom	132976911
USA	United Kingdom	668478
USA	Uruguay	244144
USA	Viet Nam	837794
USA	Zimbabwe	6300
Viet Nam	Cambodia	11328
Viet Nam	Indonesia	1538
Viet Nam	Italy	252716
Viet Nam	Japan	1012067
Viet Nam	Japan	280678
Viet Nam	Malaysia	12171
Viet Nam	Other Asia, nes	3595
Viet Nam	Rep. of Korea	23828
Viet Nam	Singapore	12262
Viet Nam	Thailand	15199
Viet Nam	USA	104429
Zimbabwe	South Africa	7.44385e+07

## Sheet: 2016
source	target	weight
Andorra	France	5521.35
Andorra	Germany	734.955
Andorra	Spain	1369.5
Antigua and Barbuda	Areas, nes	59
Argentina	Czechia	12439.1
Argentina	Germany	307702
Argentina	Spain	13136.3
Aruba	Areas, nes	22200
Australia	Austria	1593
Australia	Canada	24485
Australia	China	51428
Australia	China	3845
Australia	China, Hong Kong SAR	6796
Australia	China, Hong Kong SAR	563393
Australia	Cook Isds	35229
Australia	Fiji	23367
Australia	France	6591
Australia	French Polynesia	54527
Australia	Germany	5293
Australia	Germany	8347
Australia	Indonesia	73249
Australia	Ireland	4535
Australia	Luxembourg	6482
Australia	Netherlands	3879
Australia	New Caledonia	229893
Australia	New Zealand	142988
Australia	New Zealand	226492
Australia	Philippines	7987
Australia	Portugal	1734
Australia	Singapore	10326
Australia	Singapore	167712
Australia	Sweden	3839
Australia	Switzerland	428952
Australia	Switzerland	39433
Australia	Thailand	159946
Australia	United Arab Emirates	23417
Australia	United Kingdom	863733
Australia	United Kingdom	46569
Australia	USA	1784
Australia	USA	383967
Australia	Vanuatu	29319
Australia	Viet Nam	23266
Austria	Argentina	24792.9
Austria	Australia	200088
Austria	Australia	69.733
Austria	Belgium	833477
Austria	Belgium	1026.07
Austria	Bosnia Herzegovina	3652.68
Austria	Bulgaria	10471
Austria	Chile	11556.9
Austria	China	88518.9
Austria	China, Hong Kong SAR	15173
Austria	Croatia	11749.5
Austria	Croatia	1321.61
Austria	Czechia	1.06035e+06
Austria	Czechia	616.528
Austria	Denmark	21628.3
Austria	Egypt	344.238
Austria	Estonia	259.008
Austria	Finland	1163.32
Austria	Finland	347.558
Austria	France	389861
Austria	France	1937.03
Austria	Germany	6.83831e+07
Austria	Germany	48581.8
Austria	Greece	59929.4
Austria	Hungary	88351.7
Austria	Hungary	680.727
Austria	Iran	860.041
Austria	Iraq	726.109
Austria	Italy	1.40488e+06
Austria	Italy	2241.42
Austria	Japan	107278
Austria	Japan	7077.35
Austria	Latvia	581.109
Austria	Luxembourg	203061
Austria	Malta	100617
Austria	Netherlands	2.24144e+06
Austria	Poland	30563
Austria	Poland	1154.47
Austria	Portugal	41298.6
Austria	Portugal	241.298
Austria	Romania	873.323
Austria	Romania	682.941
Austria	Singapore	4988.68
Austria	Slovakia	70857.6
Austria	Slovakia	736.071
Austria	Slovenia	741970
Austria	Slovenia	133.932
Austria	Spain	6415.44
Austria	Spain	534.62
Austria	Sweden	759949
Austria	Switzerland	1.94718e+06
Austria	Switzerland	11370.9
Austria	Thailand	1.71115e+06
Austria	Türkiye	880175
Austria	United Arab Emirates	136548
Austria	United Kingdom	8.60968e+06
Austria	United Kingdom	2550.24
Austria	USA	5.28901e+06
Austria	USA	34999.3
Bahrain	Japan	371691
Bahrain	Saudi Arabia	327.34
Barbados	USA	300
Barbados	USA	1233231
Belgium	Australia	73.296
Belgium	Austria	287.494
Belgium	Azerbaijan	5119.6
Belgium	Brazil	2.53668e+06
Belgium	Bulgaria	1223.01
Belgium	China	4.64996e+06
Belgium	Finland	64.365
Belgium	France	1.30047e+06
Belgium	France	615.305
Belgium	Germany	2.27944e+08
Belgium	Germany	1988.02
Belgium	Greece	3176.27
Belgium	India	54815.9
Belgium	Ireland	13505.5
Belgium	Italy	1.32086e+07
Belgium	Kenya	2154.82
Belgium	Luxembourg	4821.07
Belgium	Netherlands	41762.5
Belgium	Netherlands	124.325
Belgium	Poland	9765.99
Belgium	Portugal	613.501
Belgium	Qatar	100.221
Belgium	Russian Federation	28.807
Belgium	Saudi Arabia	2431.96
Belgium	Serbia	3244.73
Belgium	Singapore	602.988
Belgium	Slovenia	4364.87
Belgium	Spain	34313.9
Belgium	Sweden	38900.2
Belgium	Switzerland	3.067e+06
Belgium	Switzerland	160.491
Belgium	Uganda	4982.81
Belgium	United Arab Emirates	114.929
Belgium	United Kingdom	3.03402e+07
Belgium	USA	3.38265e+07
Botswana	USA	7
Brazil	Argentina	1886
Brazil	Austria	67
Brazil	Congo	58
Brazil	Germany	2670841
Brazil	Switzerland	637
Brazil	USA	3970891
Brazil	USA	398
Brunei Darussalam	Malaysia	109
Bulgaria	Austria	11870.8
Bulgaria	Italy	31765.7
Bulgaria	United Kingdom	63336.8
Canada	Australia	8899.49
Canada	Belgium	3.16022e+06
Canada	Brazil	588.571
Canada	China	64.894
Canada	China, Hong Kong SAR	252087
Canada	France	35136.9
Canada	Germany	2.54357e+07
Canada	Germany	8723.67
Canada	Guatemala	3960.78
Canada	Ireland	1207.32
Canada	Italy	100.359
Canada	Japan	27681.7
Canada	Luxembourg	79.985
Canada	Mexico	780366
Canada	Mexico	1365.03
Canada	Panama	3857.4
Canada	Panama	271.648
Canada	Saint Pierre and Miquelon	268.63
Canada	Saudi Arabia	4338.82
Canada	Spain	7505.78
Canada	Switzerland	67187.6
Canada	Switzerland	8369.02
Canada	Trinidad and Tobago	1368.8
Canada	Türkiye	127506
Canada	United Kingdom	2.60502e+07
Canada	United Kingdom	13326.6
Canada	USA	1.05063e+08
Canada	USA	1.23895e+06
Chile	China, Hong Kong SAR	1394
China	Algeria	39582
China	Antigua and Barbuda	670
China	Aruba	5200
China	Australia	180569
China	Austria	54513
China	Belarus	10
China	Belgium	33700
China	Brazil	4934
China	Cameroon	426
China	Canada	231856
China	Chile	18149
China	China, Hong Kong SAR	82306
China	China, Hong Kong SAR	9658359
China	Colombia	9017
China	Croatia	16567
China	Curaçao	25082
China	Cyprus	1512
China	Czechia	19327
China	Denmark	55
China	El Salvador	10
China	Fiji	280
China	Finland	6600
China	France	62408
China	Georgia	6683
China	Germany	415498
China	Germany	438124
China	Greece	51155
China	Honduras	2101
China	Hungary	3272
China	India	42732
China	Indonesia	1684
China	Iran	34544
China	Iraq	2545
China	Ireland	378
China	Israel	1141
China	Israel	8021
China	Italy	32720
China	Japan	19143766
China	Japan	1077494
China	Jordan	13004
China	Kazakhstan	28212
China	Kuwait	272
China	Latvia	31881
China	Lebanon	32
China	Libya	3483
China	Malaysia	15081
China	Maldives	1295
China	Malta	10
China	Mexico	47353
China	Netherlands	27115
China	New Zealand	32939
China	Norway	43954
China	Other Asia, nes	3929
China	Pakistan	374
China	Panama	194820
China	Peru	12011
China	Philippines	52492
China	Poland	282
China	Portugal	65
China	Qatar	300
China	Rep. of Korea	2281813
China	Romania	5041
China	Russian Federation	11794
China	Saint Lucia	854
China	Samoa	276
China	San Marino	1016
China	Saudi Arabia	46026
China	Singapore	1181
China	South Africa	41434
China	Spain	240055
China	Sri Lanka	67797
China	Sudan	45000
China	Sweden	136925
China	Switzerland	9474
China	Thailand	4640
China	Türkiye	14499
China	United Arab Emirates	3122
China	United Kingdom	25754
China	United Kingdom	676946
China	United Rep. of Tanzania	385
China	Uruguay	10520
China	USA	17060488
China	USA	4565244
China	Viet Nam	3806
China, Hong Kong SAR	Australia	127528
China, Hong Kong SAR	Austria	21631.7
China, Hong Kong SAR	Belgium	2042.97
China, Hong Kong SAR	Canada	126261
China, Hong Kong SAR	China	7.53676e+08
China, Hong Kong SAR	China	2.2707e+06
China, Hong Kong SAR	China, Macao SAR	16731.7
China, Hong Kong SAR	Colombia	6388.63
China, Hong Kong SAR	Cyprus	399.37
China, Hong Kong SAR	Denmark	13862.3
China, Hong Kong SAR	El Salvador	1931.28
China, Hong Kong SAR	Fiji	176188
China, Hong Kong SAR	Finland	3021.94
China, Hong Kong SAR	France	1.55044e+06
China, Hong Kong SAR	Germany	1.21798e+06
China, Hong Kong SAR	Germany	3.06716e+06
China, Hong Kong SAR	Gibraltar	2804.99
China, Hong Kong SAR	India	530635
China, Hong Kong SAR	India	4348.49
China, Hong Kong SAR	Indonesia	64697.5
China, Hong Kong SAR	Indonesia	3331.13
China, Hong Kong SAR	Israel	10127.4
China, Hong Kong SAR	Italy	536097
China, Hong Kong SAR	Japan	8.0372e+07
China, Hong Kong SAR	Japan	2.53241e+06
China, Hong Kong SAR	Lebanon	120584
China, Hong Kong SAR	Luxembourg	477.44
China, Hong Kong SAR	Malaysia	1913.24
China, Hong Kong SAR	Malaysia	314757
China, Hong Kong SAR	Malta	1061.04
China, Hong Kong SAR	Mexico	91699.3
China, Hong Kong SAR	Nepal	19293.4
China, Hong Kong SAR	Netherlands	61943.9
China, Hong Kong SAR	New Zealand	49326.8
China, Hong Kong SAR	Norway	1354.38
China, Hong Kong SAR	Other Asia, nes	4.20606e+06
China, Hong Kong SAR	Other Asia, nes	2.1919e+06
China, Hong Kong SAR	Panama	9271.57
China, Hong Kong SAR	Poland	193879
China, Hong Kong SAR	Portugal	3268.01
China, Hong Kong SAR	Qatar	70898.6
China, Hong Kong SAR	Rep. of Korea	1.41952e+06
China, Hong Kong SAR	Rep. of Korea	2732.08
China, Hong Kong SAR	Russian Federation	16153.5
China, Hong Kong SAR	Saudi Arabia	9153.94
China, Hong Kong SAR	Singapore	5.23088e+07
China, Hong Kong SAR	Singapore	1.40004e+06
China, Hong Kong SAR	South Africa	34741.1
China, Hong Kong SAR	Spain	105069
China, Hong Kong SAR	Sri Lanka	261162
China, Hong Kong SAR	Sweden	217728
China, Hong Kong SAR	Switzerland	3.8751e+06
China, Hong Kong SAR	Switzerland	1.67788e+06
China, Hong Kong SAR	Thailand	2.01454e+06
China, Hong Kong SAR	Thailand	555.897
China, Hong Kong SAR	United Arab Emirates	1.0496e+06
China, Hong Kong SAR	United Kingdom	7.31975e+06
China, Hong Kong SAR	United Kingdom	2.07999e+06
China, Hong Kong SAR	USA	4.22875e+06
China, Hong Kong SAR	USA	1.04842e+07
China, Hong Kong SAR	Viet Nam	136007
Colombia	Spain	30940
Colombia	Switzerland	1599785
Colombia	USA	28630290
Costa Rica	Spain	356
Costa Rica	USA	1767937
Côte d'Ivoire	Areas, nes	10542.5
Côte d'Ivoire	France	3997.82
Côte d'Ivoire	Switzerland	925.518
Côte d'Ivoire	USA	92.552
Croatia	Areas, nes	108
Croatia	Austria	22386
Croatia	Bosnia Herzegovina	29
Croatia	Bunkers	104
Croatia	Estonia	2541
Croatia	Germany	348591
Croatia	Norway	40
Croatia	Russian Federation	146
Croatia	Serbia	727
Croatia	Slovenia	1067
Croatia	Spain	75
Czechia	Argentina	21885
Czechia	Austria	94555
Czechia	Austria	1907
Czechia	Belgium	316686
Czechia	Brazil	2112
Czechia	Canada	61716
Czechia	Colombia	3091
Czechia	Cyprus	4125
Czechia	Denmark	12914
Czechia	Egypt	56745
Czechia	France	963664
Czechia	Germany	32825334
Czechia	Germany	25926
Czechia	Greece	3878
Czechia	Hungary	28752
Czechia	Hungary	17
Czechia	India	461140
Czechia	Iran	18959
Czechia	Israel	29229
Czechia	Italy	613904
Czechia	Italy	624
Czechia	Japan	745
Czechia	Latvia	111
Czechia	Luxembourg	13202
Czechia	Mexico	18549
Czechia	Netherlands	156118
Czechia	Netherlands	1306
Czechia	Peru	1697
Czechia	Poland	1553049
Czechia	Poland	500
Czechia	Portugal	12273
Czechia	Rep. of Korea	5246
Czechia	Romania	86712
Czechia	Russian Federation	131354
Czechia	Singapore	3527
Czechia	Slovakia	6568925
Czechia	Slovakia	148014
Czechia	Slovenia	7530
Czechia	South Africa	31714
Czechia	Spain	69832
Czechia	Switzerland	16987622
Czechia	Switzerland	398
Czechia	Thailand	44296
Czechia	Ukraine	103845
Czechia	United Kingdom	7955046
Czechia	United Kingdom	188
Czechia	Uruguay	3037
Czechia	USA	11541350
Denmark	Algeria	245.549
Denmark	Australia	305.004
Denmark	Austria	1176.32
Denmark	Azerbaijan	388.984
Denmark	Belarus	255.805
Denmark	Belgium	1150.9
Denmark	Brazil	481.883
Denmark	Canada	655.938
Denmark	China	479.653
Denmark	China, Hong Kong SAR	19651.1
Denmark	Congo	74.913
Denmark	Cuba	861.057
Denmark	Czechia	459.29
Denmark	Dem. People's Rep. of Korea	970.157
Denmark	Egypt	280.182
Denmark	Estonia	642.263
Denmark	Ethiopia	325.814
Denmark	Finland	1573.18
Denmark	France	908.473
Denmark	Germany	641822
Denmark	Germany	5774.87
Denmark	Greece	412.023
Denmark	Greenland	65.549
Denmark	Hungary	129.463
Denmark	Iceland	80.71
Denmark	Ireland	189300
Denmark	Ireland	86.21
Denmark	Italy	155.772
Denmark	Italy	18655.2
Denmark	Japan	1542.41
Denmark	Kazakhstan	437.44
Denmark	Kyrgyzstan	881.421
Denmark	Lithuania	5786.31
Denmark	Malta	34.187
Denmark	Mauritania	0.149
Denmark	Netherlands	8734.09
Denmark	New Zealand	170.933
Denmark	Nigeria	34.484
Denmark	Norway	22461.4
Denmark	Norway	10736.8
Denmark	Pakistan	410.983
Denmark	Poland	588553
Denmark	Poland	150.718
Denmark	Rep. of Korea	521.569
Denmark	Rep. of Moldova	102.709
Denmark	Russian Federation	3100.73
Denmark	Rwanda	145.368
Denmark	Senegal	120.842
Denmark	Serbia	357.622
Denmark	Slovakia	272.007
Denmark	Slovenia	52.618
Denmark	Spain	860.909
Denmark	Sweden	477.721
Denmark	Sweden	4074.45
Denmark	Switzerland	6991.17
Denmark	Tajikistan	1097.69
Denmark	Türkiye	90.669
Denmark	Turkmenistan	76.846
Denmark	Ukraine	1235.47
Denmark	United Kingdom	4487.22
Denmark	USA	2822.93
Denmark	Uzbekistan	299.207
Dominican Rep.	Haiti	651
Dominican Rep.	USA	55096.9
Dominican Rep.	USA	326.868
Ecuador	USA	43442
Estonia	Austria	567.929
Estonia	Croatia	765.32
Estonia	Finland	15610.2
Estonia	Greece	3403.03
Estonia	Hungary	10860.9
Estonia	Ireland	5335.32
Estonia	Latvia	5.49861e+06
Estonia	Latvia	118779
Estonia	Lithuania	317797
Estonia	Lithuania	128822
Estonia	Poland	273447
Estonia	Sweden	11170.5
Estonia	United Kingdom	1.01297e+06
Ethiopia	USA	71065
Finland	Australia	187
Finland	Estonia	550
Finland	Germany	10092686
Finland	Germany	348
Finland	Lao People's Dem. Rep.	443
Finland	Latvia	6132920
Finland	Norway	654
Finland	Poland	170297
Finland	Russian Federation	11070
Finland	Sweden	2470103
Finland	United Kingdom	36489153
France	Algeria	185
France	Algeria	1790
France	Andorra	65
France	Austria	5032
France	Austria	14887
France	Belgium	2290305
France	Belgium	24978
France	Benin	27583
France	Brazil	1440
France	Canada	23201
France	China	106499
France	China	37449
France	China, Hong Kong SAR	27668
France	China, Hong Kong SAR	148670
France	Costa Rica	92033
France	Côte d'Ivoire	15008
France	Cyprus	433
France	Cyprus	53
France	Czechia	3259412
France	Czechia	57259
France	Finland	597
France	Germany	9900474
France	Germany	113737
France	Greece	2337
France	India	7355
France	India	34
France	Ireland	106
France	Italy	23165487
France	Italy	64287
France	Japan	664
France	Latvia	12482570
France	Lebanon	396
France	Lebanon	3005
France	Luxembourg	1752
France	Luxembourg	18426
France	Mauritania	6391
France	Mexico	42447
France	Mexico	1403
France	Morocco	39529
France	Netherlands	537104
France	Netherlands	21802
France	Other Asia, nes	13032
France	Panama	1616
France	Poland	272
France	Portugal	160
France	Portugal	77250
France	Rep. of Korea	4667
France	Rep. of Korea	24558
France	Romania	995565
France	Russian Federation	43229
France	Senegal	5695
France	Singapore	9870
France	Singapore	855
France	Slovakia	50147
France	Spain	4044081
France	Spain	3978
France	Sweden	4024
France	Switzerland	11589616
France	Switzerland	77068
France	Thailand	92388
France	Thailand	15129
France	Tunisia	26382
France	Türkiye	4753
France	United Arab Emirates	287
France	United Arab Emirates	60548
France	United Kingdom	16106857
France	United Kingdom	791770
France	USA	9975340
France	USA	144980
French Polynesia	Australia	3489.35
French Polynesia	Canada	22256.4
French Polynesia	Chile	4756.5
French Polynesia	China, Hong Kong SAR	164428
French Polynesia	Czechia	4594.96
French Polynesia	France	230393
French Polynesia	Indonesia	17516.9
French Polynesia	Italy	1493.9
French Polynesia	Japan	251.939
French Polynesia	New Caledonia	35085.2
French Polynesia	New Zealand	6823.35
French Polynesia	Spain	4244.43
French Polynesia	Tonga	790.556
French Polynesia	USA	247037
French Polynesia	Vanuatu	5332.19
French Polynesia	Viet Nam	12907.6
French Polynesia	Wallis and Futuna Isds	99929.9
Germany	Albania	10899.6
Germany	Argentina	7.56825e+06
Germany	Argentina	3878.58
Germany	Armenia	784.792
Germany	Armenia	4982.16
Germany	Aruba	44198.5
Germany	Australia	8.50345e+06
Germany	Australia	22586.3
Germany	Austria	3.82588e+07
Germany	Austria	687502
Germany	Bahamas	796.968
Germany	Bahamas	3692.62
Germany	Bangladesh	3767.89
Germany	Belgium	1.27107e+08
Germany	Belgium	71067.4
Germany	Brazil	1.17094e+08
Germany	Bulgaria	22163.5
Germany	Bulgaria	421.729
Germany	Bunkers	3418.11
Germany	Bunkers	51157.6
Germany	Canada	4.3245e+06
Germany	Canada	9107.57
Germany	Chile	22087.1
Germany	China	1.1293e+08
Germany	China	100822
Germany	China, Hong Kong SAR	1.55152e+07
Germany	China, Hong Kong SAR	61256.9
Germany	Croatia	54911.1
Germany	Croatia	547.915
Germany	Cyprus	23275.9
Germany	Czechia	4.59654e+06
Germany	Czechia	96951.1
Germany	Denmark	5.50632e+06
Germany	Denmark	15195.5
Germany	Dominican Rep.	400.698
Germany	Egypt	3504.45
Germany	Estonia	2.24594e+06
Germany	Estonia	1989.1
Germany	Ethiopia	1020.56
Germany	Finland	1.06025e+06
Germany	Finland	50849.9
Germany	France	1.24502e+08
Germany	France	135262
Germany	Greece	42497.2
Germany	Greece	585.55
Germany	Hungary	562913
Germany	Hungary	12952.9
Germany	Iceland	109088
Germany	India	1.35137e+07
Germany	Iran	15062.7
Germany	Ireland	3.82878e+07
Germany	Ireland	2238.15
Germany	Israel	281911
Germany	Italy	6.15173e+07
Germany	Italy	37465.2
Germany	Japan	3.97069e+07
Germany	Japan	14856.8
Germany	Jordan	1051.56
Germany	Kazakhstan	1944.82
Germany	Kuwait	32421.1
Germany	Latvia	318658
Germany	Latvia	94.086
Germany	Lebanon	10599.7
Germany	Lithuania	39019.3
Germany	Lithuania	7011.1
Germany	Luxembourg	869491
Germany	Luxembourg	15519.8
Germany	Malaysia	553382
Germany	Malaysia	4740.85
Germany	Mauritius	7180.46
Germany	Namibia	1008.39
Germany	Netherlands	1.33003e+07
Germany	Netherlands	97569.9
Germany	New Zealand	540290
Germany	New Zealand	1900.55
Germany	Norway	9.36823e+06
Germany	Norway	104326
Germany	Oman	1044.91
Germany	Other Asia, nes	8.41421e+06
Germany	Pakistan	1049.34
Germany	Poland	3.27379e+06
Germany	Poland	73463.8
Germany	Portugal	131619
Germany	Portugal	1973.6
Germany	Qatar	383561
Germany	Qatar	62052.8
Germany	Rep. of Korea	1.92131e+07
Germany	Rep. of Korea	2618.93
Germany	Romania	157624
Germany	Romania	14587.8
Germany	Russian Federation	349384
Germany	Russian Federation	43767.9
Germany	Saudi Arabia	116321
Germany	Serbia	9325.63
Germany	Singapore	59246846
Germany	Singapore	5441.52
Germany	Slovakia	1.15734e+07
Germany	Slovakia	14780.4
Germany	Slovenia	118847
Germany	Slovenia	938.651
Germany	South Africa	1.94854e+07
Germany	South Africa	15983.6
Germany	Spain	1.89032e+07
Germany	Spain	14505.9
Germany	Sweden	4.05494e+06
Germany	Sweden	10585.3
Germany	Switzerland	8.18681e+07
Germany	Switzerland	1.36972e+06
Germany	Thailand	6.81268e+06
Germany	Türkiye	1.61779e+06
Germany	Türkiye	7088.59
Germany	Ukraine	724216
Germany	Ukraine	7503.67
Germany	United Arab Emirates	766869
Germany	United Arab Emirates	4667.8
Germany	United Kingdom	1.13267e+08
Germany	United Kingdom	73003.4
Germany	USA	3.40023e+08
Germany	USA	213053
Germany	Viet Nam	350661
Greece	Austria	18879
Greece	Cyprus	274
Greece	Italy	221
Greece	Spain	1172
Greece	Switzerland	1958
Guatemala	USA	50
Hungary	Austria	255
Hungary	Belgium	202860
Hungary	Czechia	1135248
Hungary	Germany	888544
Hungary	United Kingdom	116160
India	Algeria	88
India	Bahrain	323
India	Belarus	5089
India	China, Hong Kong SAR	48098
India	Germany	916
India	Iran	37747
India	Israel	12809
India	Italy	11130
India	Japan	45
India	Kenya	384
India	New Zealand	513
India	Oman	586
India	Saudi Arabia	5719
India	Singapore	2133
India	United Arab Emirates	175
India	United Kingdom	1452551
India	USA	336078
India	USA	31816
Indonesia	Australia	15
Indonesia	China	30587
Indonesia	France	36
Indonesia	Japan	652530
Indonesia	Malaysia	1953
Indonesia	Malaysia	39180
Indonesia	Singapore	13721
Indonesia	Thailand	174
Indonesia	USA	3202
Ireland	China	48653.9
Ireland	Germany	174114
Ireland	Italy	322.109
Ireland	Netherlands	4280.39
Ireland	New Zealand	167.142
Ireland	Spain	564.521
Ireland	Thailand	235.77
Ireland	United Kingdom	63145.5
Ireland	United Kingdom	222.488
Ireland	USA	374805
Ireland	USA	9778.38
Israel	France	17000
Israel	South Africa	3000
Israel	USA	68000
Israel	Viet Nam	5000
Italy	Australia	53781
Italy	Austria	7.09893e+06
Italy	Austria	2035.86
Italy	Belgium	2.18588e+07
Italy	Belgium	3085.88
Italy	Bosnia Herzegovina	1936.28
Italy	Brazil	2417.58
Italy	Bulgaria	726370
Italy	Bulgaria	1878.74
Italy	Canada	114242
Italy	Canada	3545.05
Italy	Chile	31668.7
Italy	China, Hong Kong SAR	4.2024e+06
Italy	China, Hong Kong SAR	343732
Italy	Colombia	15302.1
Italy	Croatia	325366
Italy	Croatia	108.432
Italy	Cyprus	1024.57
Italy	Cyprus	5033.22
Italy	Czechia	3.65272e+06
Italy	Czechia	6562.33
Italy	Denmark	1254.71
Italy	Denmark	719.189
Italy	Estonia	1198.28
Italy	Finland	18481
Italy	France	3.07957e+07
Italy	France	61720.8
Italy	Germany	4.62946e+08
Italy	Germany	3714.34
Italy	Greece	8676.74
Italy	Greece	10249
Italy	Hungary	684362
Italy	Hungary	1655.24
Italy	Iceland	10057.6
Italy	India	2.66061e+06
Italy	Indonesia	3857.07
Italy	Iran	14050.7
Italy	Ireland	8.46324e+06
Italy	Ireland	25209.2
Italy	Israel	34899.5
Italy	Japan	3081.45
Italy	Jordan	20015.6
Italy	Latvia	4462.29
Italy	Latvia	1411.82
Italy	Lebanon	8508.57
Italy	Luxembourg	6211.58
Italy	Malta	18431.2
Italy	Malta	1410.72
Italy	Mexico	960735
Italy	Netherlands	2.31085e+07
Italy	Netherlands	662.761
Italy	New Caledonia	6831.19
Italy	Norway	113845
Italy	Poland	1.00092e+08
Italy	Poland	482.41
Italy	Portugal	1.18492e+06
Italy	Portugal	9786.51
Italy	Rep. of Korea	11584.5
Italy	Romania	165081
Italy	Romania	7990.75
Italy	Russian Federation	30783.5
Italy	Saudi Arabia	192187
Italy	Seychelles	1851.08
Italy	Singapore	596757
Italy	Singapore	25780.2
Italy	Slovakia	594215
Italy	Slovakia	6385.3
Italy	Slovenia	240650
Italy	Slovenia	60.854
Italy	South Africa	178716
Italy	Spain	3.12489e+07
Italy	Spain	25588.8
Italy	Sweden	4.70916e+06
Italy	Sweden	2200.72
Italy	Switzerland	2.23752e+08
Italy	Switzerland	1.13035e+06
Italy	Thailand	533514
Italy	Türkiye	280987
Italy	Ukraine	22355.7
Italy	United Arab Emirates	105601
Italy	United Arab Emirates	3399
Italy	United Kingdom	1.03973e+08
Italy	United Kingdom	120971
Italy	USA	2.00586e+08
Italy	USA	112884
Italy	Viet Nam	182998
Japan	Australia	229568
Japan	Australia	9006
Japan	Austria	9273175
Japan	Bahrain	1094081
Japan	Belgium	441437
Japan	Belgium	3729
Japan	Bulgaria	125553
Japan	Canada	487809
Japan	Canada	24199
Japan	China	40799218
Japan	China	271041
Japan	China, Hong Kong SAR	273742288
Japan	China, Hong Kong SAR	15850324
Japan	China, Macao SAR	1784534
Japan	Czechia	16860
Japan	Fiji	48794
Japan	France	1006899
Japan	France	317266
Japan	Germany	27135832
Japan	Germany	2477
Japan	Guam	16271
Japan	India	2397085
Japan	Indonesia	35617
Japan	Italy	58545
Japan	Italy	543666
Japan	Malaysia	65326077
Japan	Malaysia	165737
Japan	Malta	222063
Japan	Netherlands	23821
Japan	New Zealand	1645795
Japan	Other Asia, nes	56378206
Japan	Other Asia, nes	625480
Japan	Philippines	903261
Japan	Portugal	45755
Japan	Rep. of Korea	49944723
Japan	Rep. of Korea	141741
Japan	Saudi Arabia	48002
Japan	Singapore	79263580
Japan	Singapore	194227
Japan	Slovakia	7873
Japan	Slovakia	12772
Japan	Spain	2118
Japan	Sri Lanka	6031
Japan	Switzerland	399411
Japan	Switzerland	14696
Japan	Thailand	33756379
Japan	Thailand	252634
Japan	Türkiye	34079
Japan	United Arab Emirates	8848248
Japan	United Arab Emirates	6611
Japan	United Kingdom	27007407
Japan	United Kingdom	337800
Japan	USA	37332462
Japan	USA	230341
Japan	Viet Nam	9407080
Japan	Viet Nam	15138
Kazakhstan	Switzerland	2995
Kenya	Uganda	2646.17
Kenya	United Rep. of Tanzania	1286.63
Kuwait	Bahrain	4383.36
Latvia	Estonia	941967
Latvia	Estonia	639.563
Lebanon	Cyprus	14682
Lebanon	France	2182
Lebanon	France	3983
Lithuania	Bulgaria	320237
Lithuania	Estonia	92
Lithuania	Italy	342972
Lithuania	Latvia	206
Luxembourg	Belgium	5561
Luxembourg	France	21733
Luxembourg	Germany	203430
Luxembourg	Germany	100
Malaysia	Australia	6187
Malaysia	China, Hong Kong SAR	9874
Malaysia	China, Hong Kong SAR	49659
Malaysia	Japan	2015532
Malaysia	Japan	1727
Malaysia	Singapore	6631
Malta	China	7533
Malta	Libya	11
Malta	Russian Federation	13127
Mexico	Spain	8976
Mexico	USA	2238352
Netherlands	Austria	63756.1
Netherlands	Austria	86.284
Netherlands	Belgium	3.27815e+06
Netherlands	Belgium	41208.3
Netherlands	Bulgaria	7987.9
Netherlands	Bulgaria	3.319
Netherlands	Canada	19.912
Netherlands	Cayman Isds	485.624
Netherlands	China	124163
Netherlands	Colombia	7743.43
Netherlands	Croatia	4226.81
Netherlands	Croatia	1.106
Netherlands	Cyprus	32605.4
Netherlands	Cyprus	3.319
Netherlands	Czechia	45330
Netherlands	Czechia	179.205
Netherlands	Denmark	39447.2
Netherlands	Denmark	28.761
Netherlands	Egypt	30542.3
Netherlands	El Salvador	5132.79
Netherlands	Estonia	6104.03
Netherlands	Estonia	34.292
Netherlands	Finland	62726.2
Netherlands	Finland	109.514
Netherlands	France	23844.2
Netherlands	France	44394.2
Netherlands	Germany	1.22668e+07
Netherlands	Germany	4475.7
Netherlands	Greece	45056.8
Netherlands	Greece	189.161
Netherlands	Hungary	3855.12
Netherlands	Hungary	2.212
Netherlands	India	18261.2
Netherlands	Ireland	20117.4
Netherlands	Ireland	27.655
Netherlands	Italy	336.286
Netherlands	Italy	600.669
Netherlands	Japan	7713.56
Netherlands	Kuwait	589.607
Netherlands	Latvia	7376.17
Netherlands	Latvia	5.531
Netherlands	Lithuania	2879.45
Netherlands	Lithuania	1.106
Netherlands	Luxembourg	26610.8
Netherlands	Luxembourg	11.062
Netherlands	Malta	5484.56
Netherlands	Norway	1302
Netherlands	Poland	56934.1
Netherlands	Poland	365.047
Netherlands	Portugal	5849.61
Netherlands	Portugal	40.93
Netherlands	Romania	9361.8
Netherlands	Romania	4.425
Netherlands	Russian Federation	151.55
Netherlands	Slovakia	47981.6
Netherlands	Slovakia	15.487
Netherlands	Slovenia	2700.24
Netherlands	Slovenia	3.319
Netherlands	Spain	82109.1
Netherlands	Spain	35.399
Netherlands	Sweden	29968.2
Netherlands	Sweden	476.774
Netherlands	United Arab Emirates	2212.41
Netherlands	United Kingdom	900752
Netherlands	United Kingdom	2120.59
Netherlands	USA	33573.3
New Zealand	Australia	651777
New Zealand	Australia	51197
New Zealand	Austria	415
New Zealand	China, Hong Kong SAR	11180
New Zealand	Fiji	43
New Zealand	Fiji	4030
New Zealand	Thailand	652894
North Macedonia	Austria	2386.61
North Macedonia	Montenegro	2487.96
North Macedonia	United Arab Emirates	463.05
North Macedonia	United Kingdom	28323
Norway	Faeroe Isds	149
Norway	Germany	24130346
Norway	Japan	30579302
Norway	Poland	2588
Norway	Sweden	123435
Norway	United Kingdom	93872849
Norway	USA	85040247
Oman	Somalia	2.601
Oman	United Arab Emirates	5713.91
Other Asia, nes	Areas, nes	152131
Other Asia, nes	China	3935389
Other Asia, nes	China	657445
Other Asia, nes	China, Hong Kong SAR	8174823
Other Asia, nes	China, Hong Kong SAR	103366
Other Asia, nes	France	2732
Other Asia, nes	France	2980
Other Asia, nes	Germany	5953478
Other Asia, nes	India	2949
Other Asia, nes	Iran	276512
Other Asia, nes	Italy	3880
Other Asia, nes	Japan	29736630
Other Asia, nes	Japan	20859
Other Asia, nes	Malaysia	22963363
Other Asia, nes	Rep. of Korea	665391
Other Asia, nes	Singapore	66260991
Other Asia, nes	South Africa	2856
Other Asia, nes	Switzerland	3867099
Other Asia, nes	United Kingdom	3650993
Other Asia, nes	USA	18377730
Other Asia, nes	USA	26478
Pakistan	United Arab Emirates	1084
Paraguay	Italy	569333
Peru	Spain	1118.53
Peru	USA	50
Philippines	Australia	2400
Philippines	China, Hong Kong SAR	2442785
Philippines	France	1388
Philippines	Japan	116984
Philippines	Japan	227000
Philippines	Netherlands	2989
Philippines	Peru	4650
Philippines	United Kingdom	4094
Philippines	USA	769228
Poland	Areas, nes	1510
Poland	Australia	595
Poland	Belgium	5609
Poland	Bunkers	108802
Poland	Canada	601
Poland	China	648
Poland	China, Hong Kong SAR	21606
Poland	Denmark	1262
Poland	Denmark	7
Poland	France	367
Poland	Germany	669365
Poland	Germany	791
Poland	Greece	1723
Poland	India	355
Poland	Italy	654258
Poland	Italy	7747
Poland	Japan	365
Poland	Kazakhstan	16
Poland	Kuwait	227
Poland	Mexico	26
Poland	Netherlands	3893909
Poland	Norway	316
Poland	Peru	24
Poland	Romania	5785
Poland	Russian Federation	2410
Poland	Russian Federation	6062
Poland	Singapore	879
Poland	Slovakia	23
Poland	Spain	9711
Poland	Switzerland	253
Poland	Ukraine	63
Poland	Ukraine	5615
Poland	United Arab Emirates	153
Poland	United Kingdom	18225544
Poland	United Kingdom	5714
Poland	USA	6815
Portugal	Austria	675.023
Portugal	Belgium	58024.4
Portugal	Germany	203216
Portugal	Italy	153729
Portugal	Spain	1.94704e+07
Portugal	Spain	17271.7
Portugal	United Kingdom	4.50906e+06
Portugal	USA	14162.2
Rep. of Korea	Australia	1580
Rep. of Korea	China	709932
Rep. of Korea	China	24440
Rep. of Korea	China, Hong Kong SAR	2827259
Rep. of Korea	China, Hong Kong SAR	200
Rep. of Korea	France	50
Rep. of Korea	FS Micronesia	3347
Rep. of Korea	Germany	21740017
Rep. of Korea	Indonesia	352949
Rep. of Korea	Israel	45681
Rep. of Korea	Japan	24991883
Rep. of Korea	Japan	486
Rep. of Korea	Malaysia	135
Rep. of Korea	New Zealand	224
Rep. of Korea	Other Asia, nes	7122100
Rep. of Korea	Singapore	7108
Rep. of Korea	Switzerland	331
Rep. of Korea	Thailand	12445
Rep. of Korea	United Kingdom	7555900
Rep. of Korea	USA	58148576
Rep. of Korea	USA	24974
Rep. of Korea	Viet Nam	306775
Russian Federation	Belarus	12699407
Russian Federation	Belarus	2793
Russian Federation	China	1.29412e+07
Russian Federation	China, Hong Kong SAR	2.65399e+08
Russian Federation	Czechia	1.969e+07
Russian Federation	Estonia	6.51
Russian Federation	Germany	2.24308e+08
Russian Federation	Ireland	32021.9
Russian Federation	Israel	90.65
Russian Federation	Italy	4.46682e+08
Russian Federation	Japan	2.5678e+08
Russian Federation	Kazakhstan	1674
Russian Federation	Kazakhstan	5575
Russian Federation	Kyrgyzstan	3108
Russian Federation	Latvia	101193
Russian Federation	Morocco	44.48
Russian Federation	Rep. of Korea	1.39667e+07
Russian Federation	Rep. of Moldova	74.89
Russian Federation	Spain	96.4
Russian Federation	Switzerland	1.71053e+08
Russian Federation	Switzerland	2874.6
Russian Federation	Ukraine	334464
Russian Federation	United Kingdom	4.38521e+08
Russian Federation	USA	5.35494e+08
Russian Federation	USA	88.99
Russian Federation	Uzbekistan	462.57
Rwanda	China, Hong Kong SAR	512.111
Rwanda	Dem. Rep. of the Congo	2024.68
Rwanda	Kenya	3385.15
Rwanda	United Rep. of Tanzania	1022.94
Saint Lucia	USA	40071
Senegal	France	45
Senegal	United Kingdom	6998
Senegal	USA	33729
Serbia	Bulgaria	330
Serbia	Switzerland	460592
Serbia	United Kingdom	550970
Singapore	Australia	179547
Singapore	Australia	123065
Singapore	Belgium	2916.6
Singapore	Brazil	3051.28
Singapore	Brunei Darussalam	1164.32
Singapore	China	54424.8
Singapore	China	53406.8
Singapore	China, Hong Kong SAR	1.00502e+07
Singapore	China, Hong Kong SAR	380547
Singapore	Denmark	1147.67
Singapore	France	26793.2
Singapore	Germany	2.32875e+06
Singapore	India	1042.68
Singapore	Indonesia	2.38411e+06
Singapore	Indonesia	57322.6
Singapore	Italy	2066.53
Singapore	Japan	8.16037e+07
Singapore	Japan	334860
Singapore	Malaysia	211837
Singapore	Malaysia	60190.7
Singapore	Other Asia, nes	7.28601e+06
Singapore	Other Asia, nes	7357.39
Singapore	Philippines	205680
Singapore	Qatar	4283.66
Singapore	Spain	5336.48
Singapore	Switzerland	393711
Singapore	Switzerland	1.53056e+06
Singapore	Thailand	239890
Singapore	Thailand	8110.44
Singapore	United Kingdom	2.05558e+06
Singapore	United Kingdom	428.656
Singapore	USA	1.8071e+07
Singapore	USA	6280.68
Singapore	Viet Nam	179212
Singapore	Viet Nam	2514.73
Slovakia	Belgium	274810
Slovakia	Croatia	1088.09
Slovakia	Czechia	797373
Slovakia	Czechia	161.608
Slovakia	Germany	3.47674e+06
Slovakia	Germany	58714.6
Slovakia	Hungary	132497
Slovakia	Italy	45932
Slovakia	United Kingdom	1.23685e+07
Slovakia	USA	129925
Slovenia	Austria	253114
Slovenia	Austria	1554.56
Slovenia	Bosnia Herzegovina	6976.27
Slovenia	Bulgaria	5536.41
Slovenia	Croatia	347.08
Slovenia	Croatia	21134
Slovenia	Czechia	274.37
Slovenia	Germany	34794.8
Slovenia	Montenegro	1632.65
Slovenia	North Macedonia	300.99
Slovenia	Serbia	345.03
Slovenia	Serbia	3501.98
South Africa	Belgium	594050
South Africa	Botswana	791.283
South Africa	Botswana	2652.44
South Africa	China	1.79277e+08
South Africa	China, Hong Kong SAR	6.72693e+08
South Africa	Czechia	1.02731e+06
South Africa	Dem. Rep. of the Congo	160.595
South Africa	Eswatini	24.612
South Africa	Germany	6.69442e+08
South Africa	Ghana	46.216
South Africa	India	1.51039e+07
South Africa	Iran	32975.7
South Africa	Italy	1.28001e+08
South Africa	Japan	1.67654e+09
South Africa	Kenya	4351.85
South Africa	Lesotho	321.668
South Africa	Lesotho	64.812
South Africa	Mauritius	1215.57
South Africa	Mozambique	759.902
South Africa	Namibia	2456.16
South Africa	Namibia	3192
South Africa	Other Asia, nes	1.55235e+06
South Africa	Papua New Guinea	32329.8
South Africa	Rep. of Korea	5.64481e+07
South Africa	Sweden	34980
South Africa	Switzerland	2.73182e+08
South Africa	Switzerland	19859.8
South Africa	United Arab Emirates	79034.5
South Africa	United Kingdom	1.36852e+09
South Africa	United Kingdom	5760.15
South Africa	United Rep. of Tanzania	1440.77
South Africa	USA	1.01861e+09
South Africa	Zambia	923.847
South Africa	Zimbabwe	11012.5
Spain	Albania	14.388
Spain	Algeria	99.607
Spain	Andorra	2447
Spain	Andorra	29886
Spain	Areas, nes	4349.18
Spain	Argentina	575.505
Spain	Argentina	252.116
Spain	Aruba	70.831
Spain	Australia	17707.9
Spain	Belgium	497041
Spain	Bermuda	46.483
Spain	Brazil	80.792
Spain	Bulgaria	6908
Spain	Canada	38.736
Spain	Chile	16213.8
Spain	China	1154.33
Spain	China, Hong Kong SAR	842.872
Spain	Colombia	17441.2
Spain	Costa Rica	178.628
Spain	Croatia	232.416
Spain	Cuba	49.803
Spain	Curaçao	51.95
Spain	Czechia	588.875
Spain	Dominican Rep.	239.189
Spain	Ecuador	3167.37
Spain	El Salvador	1481.94
Spain	France	9.48313e+06
Spain	France	15600.6
Spain	Germany	4.71828e+06
Spain	Germany	12.174
Spain	Ghana	449.724
Spain	Gibraltar	2538.28
Spain	Greece	8245.97
Spain	Guatemala	371.865
Spain	Hungary	2298.7
Spain	Indonesia	1055.28
Spain	Israel	5731.99
Spain	Italy	7.99311e+06
Spain	Italy	36116.2
Spain	Japan	1942.96
Spain	Jordan	13.834
Spain	Kuwait	581.039
Spain	Latvia	236.112
Spain	Latvia	40.949
Spain	Libya	2217.52
Spain	Malaysia	20.917
Spain	Mexico	126502
Spain	Montenegro	90.753
Spain	Morocco	1025.18
Spain	Netherlands	10883.4
Spain	Norway	21.216
Spain	Panama	1863.6
Spain	Paraguay	75.258
Spain	Peru	76.365
Spain	Philippines	59.764
Spain	Poland	20743.9
Spain	Portugal	3.34177e+07
Spain	Portugal	97262.5
Spain	Rep. of Korea	99.607
Spain	Romania	301.742
Spain	Russian Federation	99.385
Spain	Saint Barthélemy	1945.65
Spain	Saudi Arabia	117034
Spain	Sint Maarten	319.206
Spain	Slovakia	2589.77
Spain	Switzerland	2.23722e+06
Spain	Switzerland	664.709
Spain	Türkiye	416.411
Spain	United Arab Emirates	307.508
Spain	United Kingdom	3.65681e+07
Spain	United Kingdom	79.685
Spain	United States Minor Outlying Islands	17.597
Spain	Uruguay	292.29
Spain	USA	23.242
Spain	USA	63617.6
Spain	Venezuela	346.521
Sri Lanka	Japan	15519
Sweden	China	659142
Sweden	Denmark	106276
Sweden	Denmark	116.786
Sweden	Estonia	2102.15
Sweden	Finland	232171
Sweden	Finland	26744.1
Sweden	Germany	34101.6
Sweden	Germany	9926.84
Sweden	India	341366
Sweden	Italy	5722.53
Sweden	Lebanon	233.573
Sweden	Malaysia	6306.46
Sweden	Norway	24174.8
Sweden	Norway	36437.3
Sweden	Poland	44145.2
Sweden	Spain	233.573
Sweden	Switzerland	89691.9
Sweden	Ukraine	817.504
Sweden	United Kingdom	3853.95
Sweden	USA	2335.73
Switzerland	Algeria	7.39324e+06
Switzerland	Armenia	26842
Switzerland	Aruba	4869.29
Switzerland	Australia	9.21199e+06
Switzerland	Austria	5.62502e+07
Switzerland	Bahrain	13329.1
Switzerland	Belgium	1.91034e+06
Switzerland	Belgium	37.55
Switzerland	Brunei Darussalam	1278.72
Switzerland	Canada	6.53629e+07
Switzerland	Chile	667.776
Switzerland	China	1.20773e+07
Switzerland	China, Hong Kong SAR	1.17399e+08
Switzerland	China, Hong Kong SAR	9.54265e+06
Switzerland	Colombia	2833.48
Switzerland	Costa Rica	930998
Switzerland	Czechia	582563
Switzerland	Denmark	708022
Switzerland	Egypt	824.065
Switzerland	Finland	636486
Switzerland	France	3.31128e+07
Switzerland	France	16181.9
Switzerland	Gabon	649.509
Switzerland	Germany	1.92883e+08
Switzerland	Germany	482054
Switzerland	Greece	79735.4
Switzerland	Hungary	52165.7
Switzerland	India	1.98108e+06
Switzerland	Indonesia	1989.12
Switzerland	Iran	4374.04
Switzerland	Iraq	22.327
Switzerland	Ireland	115664
Switzerland	Israel	298273
Switzerland	Italy	1.59157e+08
Switzerland	Italy	1.44674e+06
Switzerland	Japan	7.57553e+07
Switzerland	Japan	2602.1
Switzerland	Kenya	300.398
Switzerland	Kuwait	14119.7
Switzerland	Lebanon	245631
Switzerland	Luxembourg	1.52499e+06
Switzerland	Malaysia	3.25435e+06
Switzerland	Malta	214.135
Switzerland	Mauritius	2280.39
Switzerland	Mexico	703.297
Switzerland	Netherlands	896230
Switzerland	Norway	22463.9
Switzerland	Other Asia, nes	33128
Switzerland	Philippines	3298.29
Switzerland	Poland	16357.5
Switzerland	Qatar	199649
Switzerland	Rep. of Korea	2.58479e+06
Switzerland	Romania	13788.9
Switzerland	Russian Federation	182672
Switzerland	Saudi Arabia	255104
Switzerland	Serbia	35.52
Switzerland	Singapore	1.86243e+06
Switzerland	South Africa	492025
Switzerland	Spain	607701
Switzerland	Spain	44928.8
Switzerland	Sweden	467751
Switzerland	Thailand	58803.9
Switzerland	Türkiye	55264.1
Switzerland	Ukraine	2038.85
Switzerland	United Arab Emirates	3.30046e+06
Switzerland	United Arab Emirates	1.01987e+06
Switzerland	United Kingdom	1.41656e+07
Switzerland	United Kingdom	2.51016e+06
Switzerland	USA	1.81106e+08
Switzerland	USA	1.9031e+06
Switzerland	Viet Nam	70229.2
Thailand	Australia	222855
Thailand	Australia	104287
Thailand	Austria	1.16356e+06
Thailand	Bangladesh	749.95
Thailand	Canada	60.4
Thailand	China	9.97
Thailand	China, Hong Kong SAR	276600
Thailand	China, Hong Kong SAR	117248
Thailand	Denmark	4.49
Thailand	France	17634.8
Thailand	Germany	72890.6
Thailand	Germany	3842.52
Thailand	India	5262.95
Thailand	Israel	87.27
Thailand	Japan	178489
Thailand	Japan	104856
Thailand	Kuwait	20720.9
Thailand	Lao People's Dem. Rep.	469.86
Thailand	Lao People's Dem. Rep.	470.45
Thailand	Malaysia	231415
Thailand	Malaysia	75331.6
Thailand	New Zealand	44.3
Thailand	Oman	1548.97
Thailand	Philippines	494.78
Thailand	Singapore	147401
Thailand	Singapore	24272
Thailand	Switzerland	99.98
Thailand	Türkiye	2999.98
Thailand	United Arab Emirates	6080.97
Thailand	United Kingdom	21933.1
Thailand	United Kingdom	261779
Thailand	USA	478544
Thailand	USA	141478
Thailand	Viet Nam	2574.97
Thailand	Viet Nam	852.16
Tunisia	Belgium	1132
Tunisia	France	731
Tunisia	Luxembourg	1396
Türkiye	Algeria	1850
Türkiye	Azerbaijan	4746
Türkiye	Cyprus	628
Türkiye	France	61862
Türkiye	Georgia	1490
Türkiye	Germany	51215
Türkiye	Hungary	323
Türkiye	Iraq	114
Türkiye	Israel	848
Türkiye	Lebanon	6051
Türkiye	Luxembourg	5134
Türkiye	North Macedonia	1144
Türkiye	Somalia	210
Türkiye	Switzerland	7923310
Türkiye	Turkmenistan	905
Türkiye	Turkmenistan	684
Türkiye	United Kingdom	1266405
Türkiye	USA	328697
Ukraine	Areas, nes	58.36
Ukraine	Germany	312419
Ukraine	Poland	364.5
Ukraine	Russian Federation	178197
Ukraine	United Kingdom	174474
United Arab Emirates	Bangladesh	1.46442e+06
United Arab Emirates	Belgium	158882
United Arab Emirates	China, Hong Kong SAR	83967.3
United Arab Emirates	China, Hong Kong SAR	1044.8
United Arab Emirates	Egypt	41259.3
United Arab Emirates	India	823185
United Arab Emirates	Iran	60795.1
United Arab Emirates	Iraq	2.8097e+07
United Arab Emirates	Kenya	372607
United Arab Emirates	Netherlands	273.416
United Arab Emirates	Oman	2344.45
United Arab Emirates	Qatar	2816.07
United Arab Emirates	Switzerland	4.1661e+06
United Arab Emirates	Türkiye	32178.6
United Arab Emirates	United Kingdom	6.89043e+06
United Arab Emirates	USA	2722.94
United Arab Emirates	Yemen	408.441
United Arab Emirates	Yemen	217.835
United Kingdom	Argentina	34031083
United Kingdom	Australia	8820855
United Kingdom	Austria	13449400
United Kingdom	Austria	19404
United Kingdom	Bahrain	15785
United Kingdom	Belgium	10311529
United Kingdom	Belgium	2330
United Kingdom	Benin	6991
United Kingdom	Brazil	390122
United Kingdom	Bulgaria	2745607
United Kingdom	Bulgaria	7810
United Kingdom	Canada	94373743
United Kingdom	Chile	687298
United Kingdom	China	183243735
United Kingdom	China, Hong Kong SAR	634400517
United Kingdom	China, Hong Kong SAR	222814
United Kingdom	Croatia	927
United Kingdom	Croatia	112
United Kingdom	Cyprus	350
United Kingdom	Cyprus	2493
United Kingdom	Czechia	3773256
United Kingdom	Czechia	108920
United Kingdom	Denmark	1385702
United Kingdom	Denmark	15646
United Kingdom	Egypt	4961616
United Kingdom	Estonia	5045679
United Kingdom	Estonia	18327
United Kingdom	Finland	1587926
United Kingdom	Finland	14786
United Kingdom	France	11471037
United Kingdom	France	208379
United Kingdom	Georgia	938418
United Kingdom	Germany	527027040
United Kingdom	Germany	119049
United Kingdom	Ghana	2820
United Kingdom	Gibraltar	6154
United Kingdom	Greece	2008
United Kingdom	Greece	1054
United Kingdom	Hungary	21968
United Kingdom	Hungary	3854
United Kingdom	Iceland	40758
United Kingdom	India	77655667
United Kingdom	India	7017
United Kingdom	Ireland	87835143
United Kingdom	Ireland	304967
United Kingdom	Israel	1086307
United Kingdom	Italy	135374843
United Kingdom	Italy	100398
United Kingdom	Japan	243781204
United Kingdom	Japan	118026
United Kingdom	Kenya	229104
United Kingdom	Latvia	1826
United Kingdom	Latvia	25058
United Kingdom	Lithuania	5015405
United Kingdom	Luxembourg	197016
United Kingdom	Luxembourg	105
United Kingdom	Malaysia	65303
United Kingdom	Malta	185
United Kingdom	Malta	223
United Kingdom	Mexico	401833
United Kingdom	Netherlands	5103826
United Kingdom	Netherlands	23683
United Kingdom	North Macedonia	824731532
United Kingdom	Norway	2512674
United Kingdom	Other Asia, nes	5044800
United Kingdom	Pakistan	396870
United Kingdom	Peru	1205
United Kingdom	Poland	11900604
United Kingdom	Poland	822
United Kingdom	Portugal	169364
United Kingdom	Portugal	822
United Kingdom	Qatar	1989
United Kingdom	Qatar	210493
United Kingdom	Rep. of Korea	108267593
United Kingdom	Romania	6756445
United Kingdom	Romania	75280
United Kingdom	Russian Federation	83616
United Kingdom	Saudi Arabia	2674968
United Kingdom	Singapore	2445234
United Kingdom	Slovakia	973455
United Kingdom	Slovakia	7618
United Kingdom	Slovenia	167099
United Kingdom	South Africa	1272537
United Kingdom	Spain	1518568
United Kingdom	Spain	100116
United Kingdom	Sweden	2709705
United Kingdom	Sweden	1937
United Kingdom	Switzerland	481085640
United Kingdom	Switzerland	85994
United Kingdom	Thailand	221532
United Kingdom	Thailand	12636
United Kingdom	Türkiye	2320346
United Kingdom	Ukraine	1433653
United Kingdom	United Arab Emirates	21826773
United Kingdom	United Arab Emirates	12101
United Kingdom	Uruguay	457599
United Kingdom	USA	602165432
United Kingdom	USA	227165
USA	Antigua and Barbuda	12234
USA	Argentina	2644104
USA	Aruba	11393
USA	Australia	7573706
USA	Australia	91743
USA	Austria	89803
USA	Austria	3251
USA	Bahamas	5893
USA	Bahamas	16211
USA	Bahrain	2662
USA	Barbados	82135
USA	Belgium	210882
USA	Belgium	2898
USA	Brazil	41086600
USA	Canada	196224922
USA	Canada	2320208
USA	Cayman Isds	1310098
USA	Cayman Isds	49398
USA	Chile	2604959
USA	China	142656005
USA	China	22644
USA	China, Hong Kong SAR	22206150
USA	China, Hong Kong SAR	3801529
USA	Colombia	697582
USA	Costa Rica	649807
USA	Curaçao	2736
USA	Czechia	792114
USA	Denmark	238444
USA	Dominican Rep.	470939
USA	Ecuador	12993
USA	El Salvador	16333
USA	Estonia	15457
USA	Ethiopia	8711
USA	Finland	105583
USA	France	4576817
USA	France	207345
USA	Germany	315661128
USA	Germany	78482
USA	Greece	2679
USA	Grenada	8452
USA	Haiti	6454
USA	Honduras	4003
USA	Hungary	4840
USA	Iceland	107953
USA	India	37463665
USA	India	7445
USA	Iraq	3183
USA	Ireland	11842105
USA	Ireland	2739
USA	Israel	5965385
USA	Italy	160848031
USA	Japan	148992173
USA	Japan	1534010
USA	Kuwait	62672
USA	Lao People's Dem. Rep.	918967
USA	Luxembourg	100360121
USA	Malaysia	49214
USA	Mexico	21435627
USA	Mexico	162848
USA	Netherlands	264602
USA	Netherlands	249864
USA	New Zealand	619617
USA	New Zealand	3225
USA	Norway	386301
USA	Other Asia, nes	18415668
USA	Panama	39438
USA	Panama	20597
USA	Peru	85764
USA	Philippines	100714
USA	Poland	101129
USA	Poland	11810
USA	Qatar	28367
USA	Rep. of Korea	97479108
USA	Romania	35081
USA	Saint Lucia	32632
USA	Saudi Arabia	838679
USA	Singapore	56391509
USA	Singapore	38760
USA	Sint Maarten	421441
USA	Slovakia	680058
USA	South Africa	6205
USA	Spain	113774
USA	Sweden	7284
USA	Sweden	10000
USA	Switzerland	17843002
USA	Switzerland	898036
USA	Thailand	6157155
USA	Thailand	93158
USA	Trinidad and Tobago	14112
USA	Türkiye	88820
USA	Ukraine	5229
USA	United Arab Emirates	298295
USA	United Arab Emirates	32204
USA	United Kingdom	90125847
USA	United Kingdom	85014
USA	Uruguay	498743
USA	Viet Nam	622333
Viet Nam	Cambodia	11964.8
Viet Nam	China	7630
Viet Nam	Italy	60400.4
Viet Nam	Japan	201233
Viet Nam	Japan	1.11719e+06
Viet Nam	Malaysia	55816.8
Viet Nam	Other Asia, nes	8175
Viet Nam	Rep. of Korea	1989.5
Viet Nam	Singapore	24635
Viet Nam	Thailand	24278.5
Viet Nam	USA	211835
Zimbabwe	South Africa	5.37006e+07

## Sheet: 2017
source	target	weight
Andorra	France	48024.2
Andorra	Spain	1610.61
Angola	Congo	5.33
Angola	Dem. Rep. of the Congo	2171.14
Antigua and Barbuda	Areas, nes	471.555
Antigua and Barbuda	Barbados	123.1
Antigua and Barbuda	USA	116.667
Argentina	Czechia	15000
Argentina	Germany	894772
Argentina	USA	56250
Argentina	USA	3030
Australia	Brunei Darussalam	94290.1
Australia	Bunkers	334595
Australia	Canada	597.316
Australia	China	56946.7
Australia	China, Hong Kong SAR	11318.3
Australia	China, Hong Kong SAR	5.13417e+06
Australia	Fiji	295049
Australia	Germany	611082
Australia	Germany	7069.65
Australia	Indonesia	107229
Australia	Malaysia	26181.5
Australia	Netherlands	1830.29
Australia	New Caledonia	2221.34
Australia	New Caledonia	273751
Australia	New Zealand	271507
Australia	New Zealand	260296
Australia	Other Asia, nes	17664.9
Australia	Papua New Guinea	102345
Australia	Philippines	448.562
Australia	Rep. of Korea	73840.3
Australia	Singapore	582985
Australia	Sri Lanka	76760.9
Australia	Thailand	2.27179e+06
Australia	United Kingdom	724985
Australia	United Kingdom	9579.3
Australia	USA	2571.76
Australia	USA	205223
Australia	Vanuatu	208820
Australia	Viet Nam	21771
Austria	Argentina	23862.1
Austria	Australia	288391
Austria	Belgium	1.04796e+06
Austria	Belgium	2204.4
Austria	Bosnia Herzegovina	4179.54
Austria	Brazil	3234.32
Austria	Bulgaria	17556.1
Austria	Chile	19712
Austria	China	565598
Austria	Croatia	3646.51
Austria	Croatia	1347.26
Austria	Czechia	2.11963e+06
Austria	Denmark	44125.2
Austria	Denmark	818.743
Austria	Estonia	15709.7
Austria	Finland	639.184
Austria	France	410415
Austria	France	2656.12
Austria	Germany	8.75675e+07
Austria	Germany	63109.9
Austria	Greece	82627.6
Austria	Greece	2.259
Austria	Hungary	91878.8
Austria	Hungary	217.955
Austria	India	33.879
Austria	Iran	32091.3
Austria	Israel	363.635
Austria	Italy	1.17641e+06
Austria	Italy	10709.2
Austria	Japan	3386.77
Austria	Japan	4704.67
Austria	Latvia	194.24
Austria	Latvia	246.188
Austria	Luxembourg	225037
Austria	Malta	81813.3
Austria	Netherlands	1.53613e+06
Austria	Norway	145180
Austria	Poland	42216.7
Austria	Poland	1120.27
Austria	Portugal	34922.5
Austria	Portugal	2182.94
Austria	Romania	35906.1
Austria	Russian Federation	3442.11
Austria	Slovakia	133465
Austria	Slovenia	959718
Austria	Spain	2862.78
Austria	Spain	996.044
Austria	Sweden	1.10067e+06
Austria	Sweden	3125.91
Austria	Switzerland	1.64803e+06
Austria	Switzerland	18351.1
Austria	Thailand	133.258
Austria	Türkiye	1.08849e+06
Austria	United Kingdom	7.56719e+06
Austria	United Kingdom	1043.47
Austria	USA	352038
Austria	USA	3525.68
Bahrain	Saudi Arabia	1318.54
Bahrain	United Arab Emirates	244.68
Bahrain	USA	13010
Barbados	Antigua and Barbuda	17053.5
Barbados	Aruba	19094.5
Barbados	Grenada	17522
Barbados	Saint Lucia	22384.5
Barbados	USA	429644
Belgium	Austria	78.592
Belgium	Brazil	1.59536e+06
Belgium	Bulgaria	2416.66
Belgium	Chile	6976.72
Belgium	China	5.91055e+06
Belgium	Czechia	1136.02
Belgium	Denmark	2219.76
Belgium	Finland	1553.63
Belgium	France	1.56937e+06
Belgium	France	1304.02
Belgium	Germany	3.59806e+08
Belgium	Germany	217.59
Belgium	Greece	20079.1
Belgium	Guinea	47959
Belgium	India	11816.9
Belgium	Iran	6.818
Belgium	Ireland	23103
Belgium	Italy	1.8388e+07
Belgium	Japan	3.05662e+06
Belgium	Japan	11520
Belgium	Jordan	66.705
Belgium	Kenya	120.225
Belgium	Lithuania	592.76
Belgium	Luxembourg	1.72686e+06
Belgium	Luxembourg	899.497
Belgium	Netherlands	70330.9
Belgium	Netherlands	443.342
Belgium	New Caledonia	23802.9
Belgium	Poland	4670.97
Belgium	Rep. of Korea	190.825
Belgium	Russian Federation	142.023
Belgium	Saudi Arabia	1309.02
Belgium	Saudi Arabia	479.511
Belgium	Slovakia	1722.45
Belgium	Slovenia	2246.07
Belgium	South Africa	54.163
Belgium	Spain	115948
Belgium	Sweden	20313.6
Belgium	Switzerland	3.17724e+06
Belgium	Togo	4933.74
Belgium	Türkiye	146.55
Belgium	United Kingdom	7.68912e+07
Belgium	USA	4.08455e+07
Brazil	Australia	285
Brazil	Chile	500
Brazil	China, Hong Kong SAR	307
Brazil	Ecuador	674
Brazil	Germany	2112552
Brazil	Other Asia, nes	3115
Brazil	Paraguay	77
Brazil	USA	330506
Brazil	USA	89
Bulgaria	Austria	4674.39
Bulgaria	Germany	45672.9
Bulgaria	Türkiye	3903.71
Bulgaria	United Kingdom	401534
Cameroon	United Arab Emirates	1725.28
Canada	Australia	7253.92
Canada	Bahamas	10147.3
Canada	Belgium	32990.9
Canada	Belgium	8132.34
Canada	China	67599.2
Canada	China	69.349
Canada	China, Hong Kong SAR	2130.56
Canada	China, Hong Kong SAR	246909
Canada	Cyprus	1061.81
Canada	Denmark	4856.75
Canada	France	8342.7
Canada	Germany	3.137e+07
Canada	India	10332.2
Canada	Ireland	100.171
Canada	Italy	5930.12
Canada	Italy	8859.74
Canada	Mexico	556202
Canada	Mexico	866.864
Canada	New Zealand	2883.38
Canada	Pakistan	12643.1
Canada	Panama	83.989
Canada	Philippines	56919.5
Canada	Portugal	13966.9
Canada	Spain	2522
Canada	Switzerland	28809.2
Canada	Thailand	9255.8
Canada	Trinidad and Tobago	274.314
Canada	Türkiye	131700
Canada	United Arab Emirates	4624.82
Canada	United Arab Emirates	1650.51
Canada	United Kingdom	6.01826e+07
Canada	United Kingdom	28301.4
Canada	USA	1.62566e+08
Canada	USA	1.03205e+06
Chile	Bolivia (Plurinational State of)	535.841
China	Albania	1176
China	Angola	1043
China	Argentina	687
China	Armenia	2221
China	Australia	212088
China	Austria	43407
China	Bahrain	7310
China	Belarus	5217
China	Belgium	7644
China	Brazil	69525
China	Bulgaria	5397
China	Canada	174923
China	Chile	26543
China	China, Hong Kong SAR	43286168
China	China, Hong Kong SAR	42172544
China	Colombia	8740
China	Cook Isds	1100
China	Costa Rica	59757
China	Croatia	2768
China	Cuba	3822
China	Cyprus	19922
China	Czechia	31193
China	Denmark	25387
China	Dominican Rep.	3445
China	Ecuador	572
China	Egypt	54
China	Estonia	1095
China	Fiji	5876
China	Finland	37850
China	France	149422
China	Germany	840463
China	Ghana	6492
China	Greece	12763
China	Guatemala	851
China	Honduras	1103
China	Hungary	12084
China	India	57261
China	Indonesia	16568
China	Iran	137
China	Iraq	838
China	Ireland	30
China	Israel	29217
China	Italy	116757
China	Japan	36037622
China	Japan	1429034
China	Jordan	5993
China	Kazakhstan	10758
China	Kuwait	2992
China	Latvia	16171
China	Lithuania	12131
China	Malaysia	9358
China	Malta	1054
China	Mexico	52565
China	Montenegro	2950
China	Netherlands	16135
China	New Zealand	18762
China	Norway	27468
China	Other Asia, nes	29265
China	Peru	2970
China	Philippines	21813
China	Poland	61474
China	Portugal	11892
China	Qatar	14060
China	Rep. of Korea	750287
China	Romania	21367
China	Russian Federation	76936
China	Saudi Arabia	24753
China	Seychelles	1848
China	Singapore	2747
China	South Africa	58465
China	Spain	366361
China	Sweden	174576
China	Switzerland	66006
China	Thailand	31386
China	Türkiye	21795
China	United Arab Emirates	3542
China	United Kingdom	4089
China	United Kingdom	439045
China	Uruguay	12073
China	USA	603445
China	USA	4451024
China	Viet Nam	4632
China	Yemen	3503
China, Hong Kong SAR	Australia	646326
China, Hong Kong SAR	Australia	289397
China, Hong Kong SAR	Austria	39408
China, Hong Kong SAR	Bahrain	592.954
China, Hong Kong SAR	Brazil	59.283
China, Hong Kong SAR	Canada	177712
China, Hong Kong SAR	China	1.03697e+09
China, Hong Kong SAR	China	2.3784e+06
China, Hong Kong SAR	China, Macao SAR	61455.9
China, Hong Kong SAR	Colombia	13482.2
China, Hong Kong SAR	Czechia	77218.6
China, Hong Kong SAR	Denmark	28923.3
China, Hong Kong SAR	Fiji	56742.1
China, Hong Kong SAR	Finland	403.686
China, Hong Kong SAR	France	804314
China, Hong Kong SAR	Germany	2.82706e+06
China, Hong Kong SAR	Gibraltar	4313.77
China, Hong Kong SAR	India	1.41014e+06
China, Hong Kong SAR	India	31033.3
China, Hong Kong SAR	Indonesia	181462
China, Hong Kong SAR	Indonesia	4388.58
China, Hong Kong SAR	Ireland	19696.3
China, Hong Kong SAR	Israel	10839
China, Hong Kong SAR	Italy	388555
China, Hong Kong SAR	Japan	2.85603e+07
China, Hong Kong SAR	Japan	2.41246e+06
China, Hong Kong SAR	Kazakhstan	246799
China, Hong Kong SAR	Kuwait	1660.3
China, Hong Kong SAR	Lebanon	100.729
China, Hong Kong SAR	Malaysia	2719.55
China, Hong Kong SAR	Malaysia	65780.9
China, Hong Kong SAR	Malta	21204.3
China, Hong Kong SAR	Mexico	147212
China, Hong Kong SAR	Netherlands	48139.2
China, Hong Kong SAR	New Zealand	50011.4
China, Hong Kong SAR	Norway	40647.9
China, Hong Kong SAR	Other Asia, nes	2.07766e+07
China, Hong Kong SAR	Other Asia, nes	2.2569e+06
China, Hong Kong SAR	Panama	4596.45
China, Hong Kong SAR	Peru	5027.34
China, Hong Kong SAR	Philippines	2502.18
China, Hong Kong SAR	Poland	251273
China, Hong Kong SAR	Portugal	6572.28
China, Hong Kong SAR	Qatar	202904
China, Hong Kong SAR	Rep. of Korea	1.70797e+06
China, Hong Kong SAR	Rep. of Korea	15119.2
China, Hong Kong SAR	Romania	16263.2
China, Hong Kong SAR	Russian Federation	4693.2
China, Hong Kong SAR	Saudi Arabia	88462
China, Hong Kong SAR	Singapore	5.99575e+06
China, Hong Kong SAR	Singapore	743605
China, Hong Kong SAR	South Africa	34959.4
China, Hong Kong SAR	Spain	197363
China, Hong Kong SAR	Sri Lanka	201009
China, Hong Kong SAR	Sweden	84313.9
China, Hong Kong SAR	Switzerland	2.38791e+07
China, Hong Kong SAR	Switzerland	2.59385e+06
China, Hong Kong SAR	Thailand	3.56501e+06
China, Hong Kong SAR	Thailand	163442
China, Hong Kong SAR	Türkiye	128319
China, Hong Kong SAR	Ukraine	4499.31
China, Hong Kong SAR	United Arab Emirates	183103
China, Hong Kong SAR	United Kingdom	4.12357e+07
China, Hong Kong SAR	United Kingdom	2.7909e+06
China, Hong Kong SAR	USA	120120
China, Hong Kong SAR	USA	6.77479e+06
China, Hong Kong SAR	Viet Nam	42196.9
Colombia	Andorra	23930
Colombia	Switzerland	278569
Colombia	USA	2.08728e+07
Costa Rica	Guatemala	153.45
Costa Rica	Ireland	4833.57
Costa Rica	Spain	425.196
Costa Rica	USA	160226
Côte d'Ivoire	Switzerland	19457
Croatia	Estonia	1486
Croatia	Germany	126838
Croatia	Italy	1712
Croatia	Poland	1228
Croatia	Slovenia	329
Cyprus	Nigeria	203.343
Czechia	Argentina	54727
Czechia	Austria	102035
Czechia	Austria	6567
Czechia	Belgium	275735
Czechia	Belgium	213
Czechia	Bosnia Herzegovina	2050
Czechia	Bulgaria	211
Czechia	Canada	54464
Czechia	Colombia	3292
Czechia	Denmark	18623
Czechia	Denmark	920
Czechia	Egypt	48592
Czechia	France	719196
Czechia	France	64
Czechia	Germany	21858160
Czechia	Germany	157305
Czechia	Greece	4216
Czechia	Hungary	278
Czechia	India	531548
Czechia	Iran	38565
Czechia	Israel	56169
Czechia	Italy	1039459
Czechia	Italy	193
Czechia	Luxembourg	16337
Czechia	Mexico	1041
Czechia	Netherlands	158769
Czechia	Netherlands	548
Czechia	Peru	3710
Czechia	Poland	685421
Czechia	Poland	970
Czechia	Portugal	13438
Czechia	Rep. of Korea	965
Czechia	Romania	68549
Czechia	Russian Federation	6144
Czechia	Slovakia	7663050
Czechia	Slovakia	279414
Czechia	Slovenia	72024
Czechia	Slovenia	45
Czechia	South Africa	367404
Czechia	Spain	14710
Czechia	Switzerland	25893780
Czechia	Switzerland	20246
Czechia	Thailand	76599
Czechia	Ukraine	108501
Czechia	United Kingdom	24241838
Czechia	United Kingdom	2136
Czechia	USA	5552617
Denmark	Armenia	108.528
Denmark	Australia	170.761
Denmark	Austria	808.724
Denmark	Belgium	696.25
Denmark	China	101.849
Denmark	China, Hong Kong SAR	480.711
Denmark	Czechia	722.205
Denmark	Dem. People's Rep. of Korea	66.635
Denmark	Djibouti	71.34
Denmark	Faeroe Isds	210.226
Denmark	Finland	76.501
Denmark	Finland	1364.27
Denmark	France	401.782
Denmark	Germany	52083.9
Denmark	Germany	15686.3
Denmark	Greece	134.787
Denmark	Iceland	272.61
Denmark	Italy	417.416
Denmark	Japan	3615.43
Denmark	Kyrgyzstan	138.886
Denmark	Lithuania	1659.34
Denmark	Morocco	61.019
Denmark	Netherlands	176.833
Denmark	Norway	4500.2
Denmark	Norway	2848.14
Denmark	Pakistan	102.001
Denmark	Poland	337664
Denmark	Poland	252.423
Denmark	Russian Federation	1198.82
Denmark	Serbia	399.96
Denmark	Slovenia	2.884
Denmark	South Africa	1180.6
Denmark	Spain	340.611
Denmark	Sudan	61.626
Denmark	Sweden	319.816
Denmark	Sweden	2910.83
Denmark	Switzerland	6634.94
Denmark	Tajikistan	185.029
Denmark	Türkiye	74.376
Denmark	Turkmenistan	110.046
Denmark	Ukraine	313.29
Denmark	United Arab Emirates	957.021
Denmark	United Kingdom	421.059
Denmark	USA	35.518
Denmark	Uzbekistan	210.681
Dominican Rep.	Areas, nes	50.125
Dominican Rep.	France	250
Dominican Rep.	Haiti	8484.01
Dominican Rep.	Spain	100
Dominican Rep.	USA	107263
Dominican Rep.	USA	1203.95
Dominican Rep.	Venezuela	3677.08
Ecuador	Colombia	7388
El Salvador	Honduras	300
El Salvador	Spain	205.32
Estonia	Austria	620.357
Estonia	Belgium	23398.8
Estonia	Croatia	1342.58
Estonia	Finland	1355.47
Estonia	Finland	37920.9
Estonia	Hungary	15150.2
Estonia	Ireland	10540
Estonia	Latvia	31563.2
Estonia	Latvia	96555.9
Estonia	Lithuania	1.44982e+06
Estonia	Lithuania	142646
Estonia	Netherlands	309.331
Ethiopia	Türkiye	15069.8
Ethiopia	USA	43863.1
Finland	Germany	1.87245e+07
Finland	Germany	303.909
Finland	Norway	71.176
Finland	Russian Federation	10416.5
Finland	Sweden	10207.5
Finland	United Kingdom	6.24563e+07
Finland	USA	195503
France	Australia	508.321
France	Australia	85.85
France	Austria	20100.1
France	Bangladesh	1662.78
France	Belgium	708598
France	Belgium	52816.8
France	Brazil	11997.5
France	Canada	8604.18
France	China	75068.9
France	China	180579
France	China, Hong Kong SAR	982.754
France	China, Hong Kong SAR	51764
France	Costa Rica	85207
France	Croatia	190.903
France	Cyprus	1999.4
France	Czechia	280.141
France	Czechia	5728.21
France	Finland	4944.27
France	French Polynesia	2543.86
France	Germany	1.09595e+07
France	Germany	142485
France	Greece	5862.64
France	Guam	589.652
France	Guinea	2146.24
France	India	9996.98
France	Italy	5.02209e+07
France	Italy	168249
France	Japan	40510.9
France	Japan	55103.1
France	Lebanon	454.1
France	Lebanon	22856.4
France	Luxembourg	1439.11
France	Luxembourg	26072.4
France	Malaysia	3267.94
France	Mauritius	30.499
France	Mexico	33540.2
France	Mexico	792.981
France	Morocco	48267.9
France	Netherlands	327840
France	Netherlands	31807.3
France	New Caledonia	553.505
France	Panama	2551.77
France	Poland	8292.41
France	Portugal	5018.82
France	Portugal	97343.5
France	Rep. of Korea	50251.5
France	Romania	5744.03
France	Romania	110.701
France	Russian Federation	62559.6
France	Singapore	11167.2
France	Spain	1.08591e+07
France	Spain	29278.2
France	Sweden	8317.26
France	Switzerland	1.19676e+07
France	Switzerland	1.72013e+06
France	Thailand	42944.1
France	Türkiye	4653.96
France	Türkiye	25300.8
France	United Arab Emirates	238821
France	United Kingdom	3.314e+06
France	United Kingdom	590274
France	USA	1.4519e+07
France	USA	666525
France	Viet Nam	68705.8
France	Viet Nam	2148.5
French Polynesia	Australia	4140.36
French Polynesia	Canada	18854.2
French Polynesia	Chile	7497.65
French Polynesia	China	4779.48
French Polynesia	China, Hong Kong SAR	44540.7
French Polynesia	Cook Isds	710.005
French Polynesia	Fiji	5965.73
French Polynesia	France	296477
French Polynesia	Germany	18264.8
French Polynesia	New Caledonia	49416
French Polynesia	New Zealand	3355.1
French Polynesia	Switzerland	4182.75
French Polynesia	USA	899642
French Polynesia	Wallis and Futuna Isds	29547.7
Germany	Albania	29754.3
Germany	Argentina	1.07386e+07
Germany	Argentina	2926.97
Germany	Australia	8.63634e+06
Germany	Australia	24954.3
Germany	Austria	5.01015e+07
Germany	Austria	713252
Germany	Bangladesh	4663.26
Germany	Belgium	1.7587e+08
Germany	Belgium	68317.7
Germany	Brazil	1.48588e+08
Germany	Brunei Darussalam	1700.15
Germany	Bulgaria	25488.7
Germany	Bulgaria	14904.8
Germany	Bunkers	24978
Germany	Canada	2.71611e+06
Germany	Canada	10974.7
Germany	Chile	617.927
Germany	China	1.60725e+08
Germany	China	269408
Germany	China, Hong Kong SAR	2.70849e+07
Germany	China, Hong Kong SAR	68961.6
Germany	Colombia	564.833
Germany	Costa Rica	19405.4
Germany	Croatia	43596.1
Germany	Croatia	638.261
Germany	Cyprus	15967.8
Germany	Czechia	4.81757e+06
Germany	Czechia	116443
Germany	Denmark	4.40588e+06
Germany	Denmark	12230.9
Germany	Dominican Rep.	12713.3
Germany	Egypt	1309.28
Germany	Estonia	1.62394e+06
Germany	Estonia	4519.79
Germany	Ethiopia	1021.22
Germany	Finland	1.04907e+06
Germany	Finland	11175.8
Germany	France	1.31794e+08
Germany	France	138903
Germany	Greece	36510.8
Germany	Greece	2116.99
Germany	Guatemala	3735.8
Germany	Hungary	507776
Germany	Hungary	10547.7
Germany	Iceland	152342
Germany	Iceland	2097.79
Germany	India	5.5843e+07
Germany	India	9376.23
Germany	Indonesia	3497.45
Germany	Iran	69386.3
Germany	Ireland	3.04187e+07
Germany	Ireland	389.735
Germany	Israel	309051
Germany	Italy	7.99832e+07
Germany	Italy	9887.97
Germany	Japan	4.32254e+07
Germany	Japan	13852
Germany	Jordan	1683.2
Germany	Kazakhstan	1101.42
Germany	Kuwait	38466.3
Germany	Latvia	647395
Germany	Latvia	35.02
Germany	Lebanon	23458.6
Germany	Lithuania	548872
Germany	Lithuania	17065.9
Germany	Luxembourg	812614
Germany	Luxembourg	10996.2
Germany	Malaysia	1.03938e+06
Germany	Malaysia	796.415
Germany	Malta	5440.47
Germany	Mauritania	598.723
Germany	Mexico	18415.8
Germany	Netherlands	1.39431e+07
Germany	Netherlands	106300
Germany	New Caledonia	3266.99
Germany	New Zealand	537955
Germany	North Macedonia	660.855
Germany	Norway	6.96171e+06
Germany	Norway	142816
Germany	Other Asia, nes	4.63481e+06
Germany	Pakistan	2007.42
Germany	Poland	9.72976e+06
Germany	Poland	183997
Germany	Portugal	173638
Germany	Portugal	2207.37
Germany	Qatar	570522
Germany	Qatar	83524.1
Germany	Rep. of Korea	3.02748e+07
Germany	Romania	324212
Germany	Romania	40601.3
Germany	Russian Federation	227468
Germany	Russian Federation	25805
Germany	Saudi Arabia	98950.8
Germany	Senegal	2579.03
Germany	Singapore	8.63818e+07
Germany	Singapore	961.346
Germany	Slovakia	4.19828e+06
Germany	Slovakia	13815.8
Germany	Slovenia	172964
Germany	Slovenia	2241.26
Germany	South Africa	2.51132e+07
Germany	Spain	1.74778e+07
Germany	Spain	16138.4
Germany	Sweden	4.64761e+06
Germany	Sweden	3346.07
Germany	Switzerland	9.29894e+07
Germany	Switzerland	1.40086e+06
Germany	Thailand	1.05075e+07
Germany	Togo	1053.98
Germany	Türkiye	1.03411e+06
Germany	Türkiye	25.982
Germany	Turkmenistan	11663.8
Germany	Ukraine	916742
Germany	United Arab Emirates	90381.2
Germany	United Arab Emirates	4195.58
Germany	United Kingdom	9.27266e+07
Germany	United Kingdom	137249
Germany	Uruguay	1204.22
Germany	USA	6.70814e+08
Germany	USA	136922
Germany	Uzbekistan	1.88387e+06
Germany	Viet Nam	254819
Ghana	Côte d'Ivoire	142.58
Ghana	Eswatini	19.633
Ghana	USA	100.253
Greece	Austria	56089.1
Greece	Croatia	111.869
Greece	Cyprus	396.625
Greece	Germany	17128.3
Greece	Italy	272.327
Greece	Spain	2093.86
Guatemala	USA	244
Hungary	Austria	2558
Hungary	Belgium	139054
Hungary	Czechia	865129
Hungary	Germany	402311
Hungary	Italy	16583
Hungary	Nigeria	9123
Hungary	Serbia	26
Hungary	Slovakia	2
Hungary	Switzerland	25402
Hungary	United Kingdom	148011
India	Australia	4620.81
India	Bulgaria	8518.41
India	Canada	709.509
India	Canada	2979.82
India	China, Hong Kong SAR	41.649
India	China, Hong Kong SAR	44141.8
India	Ethiopia	892.538
India	France	83593.2
India	Germany	3.53955e+06
India	Germany	1133.71
India	Israel	5028.38
India	Italy	3.02764e+06
India	Italy	6366.39
India	Japan	1.38363e+06
India	Kenya	191.552
India	Kuwait	976.051
India	Netherlands	5024
India	Nigeria	229.531
India	Peru	9.368
India	Rep. of Korea	800.855
India	Saudi Arabia	1864.93
India	Singapore	943.463
India	Singapore	132.687
India	Sri Lanka	2.058
India	Sri Lanka	235.274
India	United Arab Emirates	9099.85
India	United Arab Emirates	8747.4
India	United Kingdom	1.2242e+07
India	United Kingdom	9552.4
India	USA	333557
India	USA	66332
Indonesia	Australia	236614
Indonesia	China	603534
Indonesia	China, Hong Kong SAR	1.13
Indonesia	China, Hong Kong SAR	103415
Indonesia	France	100
Indonesia	Japan	15037
Indonesia	Papua New Guinea	143.35
Indonesia	Singapore	8078.24
Indonesia	Singapore	3.93835e+06
Indonesia	USA	160
Ireland	Belgium	774.961
Ireland	China	98281.1
Ireland	China, Hong Kong SAR	6440.31
Ireland	Costa Rica	12054.8
Ireland	Denmark	406.685
Ireland	France	314.051
Ireland	Germany	150746
Ireland	Hungary	251.919
Ireland	India	4026.18
Ireland	Italy	1206.5
Ireland	Poland	246.27
Ireland	Portugal	1840.25
Ireland	Spain	1420.01
Ireland	Thailand	708.31
Ireland	United Kingdom	39258.7
Ireland	United Kingdom	351.331
Ireland	USA	1.99731e+06
Israel	Australia	4000
Israel	Bulgaria	1000
Israel	France	3000
Israel	Germany	1231000
Israel	Italy	17000
Israel	Thailand	13000
Israel	USA	1000
Italy	Albania	7094.46
Italy	Australia	175160
Italy	Australia	9729.89
Italy	Austria	1.15061e+06
Italy	Austria	8420.08
Italy	Bahrain	2269.59
Italy	Belgium	3.62607e+07
Italy	Belgium	4369.81
Italy	Brazil	17492.8
Italy	Brazil	1924.07
Italy	Bulgaria	686378
Italy	Bulgaria	551.026
Italy	Canada	146452
Italy	Canada	6458.74
Italy	China	50491.1
Italy	China, Hong Kong SAR	7.09024e+06
Italy	China, Hong Kong SAR	352442
Italy	Colombia	107434
Italy	Croatia	293.579
Italy	Croatia	1899.23
Italy	Cyprus	3884.28
Italy	Czechia	2.54944e+06
Italy	Czechia	26795.9
Italy	Denmark	239.38
Italy	Estonia	818.634
Italy	Finland	722432
Italy	Finland	1147.22
Italy	France	5.63471e+07
Italy	France	280723
Italy	Germany	6.2107e+08
Italy	Germany	17748
Italy	Greece	27414.7
Italy	Greece	11588.5
Italy	Hungary	302503
Italy	Hungary	254.059
Italy	Iceland	10802.6
Italy	India	3.33067e+06
Italy	Iran	37647
Italy	Ireland	2.2499e+06
Italy	Ireland	20777.5
Italy	Israel	15091.1
Italy	Japan	71144.4
Italy	Latvia	464.081
Italy	Latvia	22869.8
Italy	Lithuania	1.10277e+06
Italy	Luxembourg	2679.47
Italy	Luxembourg	4424.01
Italy	Malta	659006
Italy	Malta	3551.18
Italy	Mexico	684756
Italy	Mexico	2134.09
Italy	Netherlands	2.28569e+07
Italy	Netherlands	7538.21
Italy	New Caledonia	10634.3
Italy	New Zealand	1806.64
Italy	Norway	158473
Italy	Other Asia, nes	8861.58
Italy	Poland	1.38304e+08
Italy	Poland	1753.57
Italy	Portugal	2.0174e+06
Italy	Portugal	10435.6
Italy	Rep. of Korea	1519.84
Italy	Rep. of Korea	8762.21
Italy	Romania	119917
Italy	Romania	7907.44
Italy	Russian Federation	81141.9
Italy	Saudi Arabia	45177.3
Italy	Singapore	165251
Italy	Singapore	6803.14
Italy	Slovakia	45921.4
Italy	Slovakia	1887.94
Italy	Slovenia	9738.93
Italy	Slovenia	1898.1
Italy	South Africa	166864
Italy	Spain	5.02075e+07
Italy	Spain	45349
Italy	Sweden	57560.7
Italy	Sweden	739.594
Italy	Switzerland	2.45662e+08
Italy	Switzerland	1.00919e+06
Italy	Thailand	1.50515e+06
Italy	Thailand	8625.58
Italy	Türkiye	357516
Italy	Türkiye	8082.46
Italy	United Arab Emirates	113943
Italy	United Arab Emirates	6064.67
Italy	United Kingdom	2.27726e+08
Italy	United Kingdom	189093
Italy	USA	2.05081e+08
Italy	USA	623897
Italy	Viet Nam	8260.87
Italy	Viet Nam	2633.18
Japan	Australia	231903
Japan	Australia	11459.2
Japan	Austria	1.41032e+07
Japan	Bahrain	3.91875e+06
Japan	Belgium	566538
Japan	Bulgaria	84958.5
Japan	Canada	2.14071e+06
Japan	Canada	2318.59
Japan	China	5.31005e+07
Japan	China	567056
Japan	China, Hong Kong SAR	2.71537e+08
Japan	China, Hong Kong SAR	1.89718e+07
Japan	China, Macao SAR	1.13302e+07
Japan	Costa Rica	136815
Japan	Czechia	83772.4
Japan	Denmark	10719
Japan	Fiji	19146.2
Japan	France	2.57808e+06
Japan	France	60729.2
Japan	Germany	2.00904e+07
Japan	Germany	18138.5
Japan	India	2.95333e+06
Japan	Indonesia	35849
Japan	Israel	22392.2
Japan	Italy	80365.9
Japan	Italy	109741
Japan	Malaysia	9.9969e+07
Japan	Malaysia	86635
Japan	Malta	430607
Japan	New Zealand	2.06531e+06
Japan	New Zealand	2853.65
Japan	Other Asia, nes	6.33771e+07
Japan	Other Asia, nes	287175
Japan	Philippines	594397
Japan	Portugal	69967.9
Japan	Rep. of Korea	6.28067e+07
Japan	Rep. of Korea	48191
Japan	Saudi Arabia	3575.98
Japan	Singapore	6.21522e+07
Japan	Singapore	452062
Japan	South Africa	3228.19
Japan	Switzerland	1.57235e+07
Japan	Switzerland	23159.1
Japan	Thailand	4.2873e+07
Japan	Thailand	105656
Japan	Türkiye	44730.9
Japan	United Arab Emirates	2.98657e+06
Japan	United Kingdom	6.35582e+07
Japan	United Kingdom	286185
Japan	USA	6.03787e+07
Japan	USA	582617
Japan	Viet Nam	5.37799e+06
Japan	Viet Nam	11592.9
Kazakhstan	Kyrgyzstan	223.01
Kenya	Bermuda	90.536
Kenya	Kazakhstan	354.999
Kenya	Netherlands	500.555
Kenya	United Kingdom	28233.7
Kenya	United Rep. of Tanzania	170.691
Kuwait	Spain	8160.23
Kuwait	Türkiye	54210.3
Lao People's Dem. Rep.	USA	44799
Latvia	Germany	220394
Latvia	Lithuania	656842
Lebanon	Türkiye	22007.3
Lithuania	Czechia	194067
Lithuania	Estonia	1
Lithuania	Italy	2662856
Lithuania	Latvia	11
Lithuania	Poland	128617
Lithuania	Poland	4889
Lithuania	Russian Federation	3471
Lithuania	Russian Federation	104
Luxembourg	Belgium	1.09535e+06
Luxembourg	France	9.73173e+06
Luxembourg	France	1479.28
Luxembourg	Germany	241838
Luxembourg	Germany	157.026
Madagascar	Canada	29382.1
Madagascar	France	38.902
Malaysia	China, Hong Kong SAR	22226.1
Malaysia	Germany	832648
Malaysia	Japan	1.0541e+06
Malaysia	Other Asia, nes	82380.2
Malaysia	USA	540570
Malta	USA	4166.23
Mauritius	Romania	5761.55
Mexico	Spain	710
Mexico	USA	1394088
Mexico	USA	6450
Namibia	South Africa	1040.79
Netherlands	Austria	27822.1
Netherlands	Austria	88.091
Netherlands	Azerbaijan	601.956
Netherlands	Barbados	319.613
Netherlands	Belgium	502975
Netherlands	Belgium	26404.8
Netherlands	Bulgaria	141.172
Netherlands	Bulgaria	650.519
Netherlands	Bunkers	3346.34
Netherlands	China	186913
Netherlands	China	309.448
Netherlands	Croatia	326.389
Netherlands	Croatia	521.771
Netherlands	Cyprus	325.26
Netherlands	Cyprus	781.527
Netherlands	Czechia	1161
Netherlands	Czechia	994.978
Netherlands	Denmark	271.05
Netherlands	Denmark	66.633
Netherlands	Estonia	217.969
Netherlands	Estonia	16.941
Netherlands	Finland	6675.73
Netherlands	Finland	116.326
Netherlands	France	5524.9
Netherlands	France	30886.1
Netherlands	Germany	1.26954e+07
Netherlands	Germany	13038.6
Netherlands	Greece	950.933
Netherlands	Greece	1.129
Netherlands	Hungary	180.7
Netherlands	Hungary	3.388
Netherlands	Ireland	2502.69
Netherlands	Ireland	195.382
Netherlands	Italy	216999
Netherlands	Italy	4518.62
Netherlands	Kuwait	1025.47
Netherlands	Latvia	12.423
Netherlands	Latvia	4.517
Netherlands	Lithuania	1.129
Netherlands	Luxembourg	263987
Netherlands	Luxembourg	5.647
Netherlands	Malta	861.712
Netherlands	Malta	1.129
Netherlands	Poland	12208.5
Netherlands	Poland	1266.03
Netherlands	Portugal	877.524
Netherlands	Portugal	42.916
Netherlands	Romania	2178.56
Netherlands	Romania	2.259
Netherlands	Singapore	2598.69
Netherlands	Slovakia	1310.07
Netherlands	Slovakia	9.035
Netherlands	Slovenia	35.011
Netherlands	Slovenia	29.364
Netherlands	Spain	424.645
Netherlands	Spain	930.604
Netherlands	Sweden	171.665
Netherlands	Sweden	3419.74
Netherlands	Ukraine	315.095
Netherlands	United Kingdom	9666.31
Netherlands	United Kingdom	8122.46
Netherlands	USA	71735.6
Netherlands	USA	7897.71
New Zealand	Australia	1.24728e+06
New Zealand	Australia	229.315
New Zealand	China, Hong Kong SAR	4357.69
New Zealand	Samoa	782.369
New Zealand	Spain	210.146
New Zealand	Thailand	448881
New Zealand	USA	9781.03
North Macedonia	Areas, nes	8868.97
North Macedonia	United Kingdom	2.07376e+06
Norway	Czechia	290.829
Norway	Germany	2.00322e+06
Norway	Ghana	6675.77
Norway	Japan	3.31708e+07
Norway	Rep. of Korea	448320
Norway	Sweden	60878.3
Norway	Sweden	14896.4
Norway	United Kingdom	9.89012e+07
Norway	USA	1.09585e+08
Oman	Qatar	2.601
Other Asia, nes	Areas, nes	311919
Other Asia, nes	China	8.36756e+06
Other Asia, nes	China	398220
Other Asia, nes	China, Hong Kong SAR	7.11449e+06
Other Asia, nes	China, Hong Kong SAR	338494
Other Asia, nes	China, Macao SAR	64265.2
Other Asia, nes	France	37197.5
Other Asia, nes	Germany	2.86843e+07
Other Asia, nes	India	920.89
Other Asia, nes	Iran	345006
Other Asia, nes	Japan	3.95997e+07
Other Asia, nes	Japan	82354.1
Other Asia, nes	Malaysia	1.43836e+07
Other Asia, nes	Maldives	65.77
Other Asia, nes	Myanmar	164.44
Other Asia, nes	New Zealand	5591.13
Other Asia, nes	Rep. of Korea	694781
Other Asia, nes	Rep. of Korea	35257
Other Asia, nes	Saudi Arabia	2302.23
Other Asia, nes	Singapore	6.77342e+07
Other Asia, nes	Singapore	6084.46
Other Asia, nes	Switzerland	5.32421e+06
Other Asia, nes	United Kingdom	4.76717e+06
Other Asia, nes	USA	1.22212e+07
Other Asia, nes	USA	9636.47
Pakistan	China	37107.6
Pakistan	Türkiye	23907.8
Panama	Uruguay	90537
Peru	Brazil	80000
Peru	USA	50
Philippines	Australia	27540
Philippines	China, Hong Kong SAR	4758058
Philippines	Dominican Rep.	5198
Philippines	France	39100
Philippines	Japan	5439
Philippines	Japan	676899
Philippines	Kazakhstan	67227
Philippines	Singapore	250
Philippines	Switzerland	1000
Philippines	United Kingdom	2313
Philippines	USA	1253319
Poland	Areas, nes	5156
Poland	Austria	38
Poland	Belgium	40
Poland	China, Hong Kong SAR	12373
Poland	Croatia	23
Poland	Czechia	1216
Poland	Denmark	23
Poland	Estonia	6122529
Poland	France	339
Poland	France	213
Poland	Germany	3140405
Poland	Germany	861
Poland	Greece	5125
Poland	Hungary	6994
Poland	Italy	931885
Poland	Italy	27062
Poland	Kazakhstan	1900
Poland	Lebanon	406
Poland	Lithuania	975
Poland	Mexico	5016
Poland	Netherlands	3071566
Poland	Netherlands	114
Poland	Rep. of Korea	361
Poland	Romania	1426
Poland	Romania	5581
Poland	Russian Federation	16930
Poland	Russian Federation	16587
Poland	Saudi Arabia	1901
Poland	Slovakia	6
Poland	Slovenia	2
Poland	Spain	21217
Poland	Sweden	12
Poland	Türkiye	2734
Poland	Ukraine	7978
Poland	Ukraine	484
Poland	United Kingdom	18819890
Poland	United Kingdom	2668
Poland	USA	15864
Poland	USA	6610
Portugal	Germany	2.94668e+06
Portugal	Italy	260647
Portugal	Netherlands	196907
Portugal	Spain	18256.8
Portugal	Spain	23849.1
Portugal	United Kingdom	3.93092e+06
Portugal	USA	27079.3
Qatar	India	83060.3
Rep. of Korea	Australia	1768
Rep. of Korea	China	1695324
Rep. of Korea	China, Hong Kong SAR	274374
Rep. of Korea	FS Micronesia	12260
Rep. of Korea	Germany	1574913
Rep. of Korea	India	1404
Rep. of Korea	Indonesia	499171
Rep. of Korea	Israel	198733
Rep. of Korea	Japan	19734764
Rep. of Korea	Japan	9727
Rep. of Korea	Malaysia	178
Rep. of Korea	New Zealand	427
Rep. of Korea	Other Asia, nes	9326002
Rep. of Korea	Singapore	200816
Rep. of Korea	Thailand	34245
Rep. of Korea	Thailand	634
Rep. of Korea	Türkiye	398
Rep. of Korea	United Kingdom	29078260
Rep. of Korea	USA	7175622
Rep. of Korea	USA	10567
Rep. of Korea	Viet Nam	655280
Rep. of Korea	Viet Nam	8450
Russian Federation	Armenia	16
Russian Federation	Austria	693.65
Russian Federation	Belarus	13951857
Russian Federation	Belarus	1992
Russian Federation	Bulgaria	7613.9
Russian Federation	China	1.023e+06
Russian Federation	China, Hong Kong SAR	2.12392e+08
Russian Federation	Czechia	8.80954e+07
Russian Federation	Georgia	6.92
Russian Federation	Germany	2.13341e+08
Russian Federation	Israel	40.16
Russian Federation	Italy	5.37979e+08
Russian Federation	Italy	29.57
Russian Federation	Japan	4.80434e+08
Russian Federation	Kazakhstan	27344
Russian Federation	Kazakhstan	330
Russian Federation	Kyrgyzstan	13
Russian Federation	Latvia	174535
Russian Federation	Morocco	9.2
Russian Federation	Poland	99432.4
Russian Federation	Rep. of Korea	1.62159e+08
Russian Federation	Rep. of Moldova	8043.9
Russian Federation	Slovakia	3.9
Russian Federation	Switzerland	2.99696e+08
Russian Federation	Ukraine	314032
Russian Federation	United Arab Emirates	2794.2
Russian Federation	United Kingdom	4.82358e+08
Russian Federation	USA	7.8676e+08
Russian Federation	Uzbekistan	335.1
Saint Lucia	Antigua and Barbuda	935.192
Saint Lucia	Areas, nes	588.414
Saint Lucia	Aruba	300.666
Saint Lucia	Barbados	120.148
Saint Lucia	USA	15369.7
Serbia	Czechia	2335
Serbia	Germany	49119
Serbia	Montenegro	2628
Serbia	Switzerland	618556
Serbia	Türkiye	21165
Serbia	United Kingdom	823169
Singapore	Australia	265425
Singapore	Australia	43647.1
Singapore	China	83458.8
Singapore	China	2940.24
Singapore	China, Hong Kong SAR	6.38646e+06
Singapore	China, Hong Kong SAR	12143.6
Singapore	Denmark	1513.97
Singapore	France	1811.83
Singapore	Germany	7.44533e+06
Singapore	India	31197.6
Singapore	Indonesia	54151.4
Singapore	Indonesia	93081.9
Singapore	Japan	1.55608e+07
Singapore	Japan	43460.1
Singapore	Malaysia	79629.4
Singapore	Malaysia	47452.6
Singapore	Other Asia, nes	2.17288e+06
Singapore	Other Asia, nes	2894.59
Singapore	Philippines	2108.97
Singapore	Rep. of Korea	11417.4
Singapore	Spain	6092.83
Singapore	Switzerland	4556.4
Singapore	Thailand	71292
Singapore	Thailand	14274.3
Singapore	United Arab Emirates	982.738
Singapore	United Kingdom	5.73975e+06
Singapore	United Kingdom	4636.12
Singapore	USA	1.88797e+07
Singapore	USA	29538.7
Singapore	Viet Nam	1111.74
Slovakia	Austria	125499
Slovakia	Czechia	14667.8
Slovakia	Czechia	48.576
Slovakia	Germany	263035
Slovakia	Hungary	2.71661e+07
Slovakia	Italy	14324.4
Slovakia	United Kingdom	5.02556e+07
Slovakia	USA	571103
Slovenia	Austria	518.93
Slovenia	Bosnia Herzegovina	218.37
Slovenia	Bosnia Herzegovina	11288.9
Slovenia	Croatia	486.51
Slovenia	Croatia	21801.8
Slovenia	Germany	25815.6
Slovenia	Italy	1000.24
Slovenia	Montenegro	1987.3
Slovenia	Serbia	669.6
Slovenia	Serbia	9866.49
South Africa	Angola	9970.89
South Africa	Australia	76.863
South Africa	Belgium	1.82087e+06
South Africa	Botswana	4990.55
South Africa	Botswana	689.141
South Africa	China	6.90819e+07
South Africa	China, Hong Kong SAR	6.0191e+08
South Africa	Czechia	1.68404e+06
South Africa	Dem. Rep. of the Congo	562.963
South Africa	Eswatini	52.543
South Africa	Eswatini	580.602
South Africa	France	2.42362e+07
South Africa	Germany	7.51151e+08
South Africa	Ghana	34.528
South Africa	India	3.97396e+07
South Africa	Italy	6.27881e+07
South Africa	Japan	1.85234e+09
South Africa	Kenya	1287.46
South Africa	Lesotho	1434.8
South Africa	Malawi	100.808
South Africa	Mauritius	229.238
South Africa	Mozambique	116.421
South Africa	Mozambique	113.193
South Africa	Namibia	242.524
South Africa	Namibia	1775.88
South Africa	Other Asia, nes	8.87754e+06
South Africa	Rep. of Korea	5.60085e+07
South Africa	Switzerland	1.14973e+08
South Africa	Uganda	28.674
South Africa	United Arab Emirates	50.066
South Africa	United Kingdom	1.4664e+09
South Africa	United Rep. of Tanzania	346.935
South Africa	USA	1.52741e+09
South Africa	Zambia	307.978
South Africa	Zambia	808.94
South Africa	Zimbabwe	6193.11
Spain	Andorra	5096.19
Spain	Andorra	42719.5
Spain	Areas, nes	3288.67
Spain	Argentina	115.227
Spain	Australia	13556.2
Spain	Austria	36.15
Spain	Barbados	55.354
Spain	Belgium	38.409
Spain	Bermuda	5.648
Spain	Bolivia (Plurinational State of)	1101.1
Spain	Br. Virgin Isds	51.965
Spain	Brazil	106.642
Spain	Bulgaria	137476
Spain	Bulgaria	133.788
Spain	Bunkers	2013.09
Spain	Chile	27209.1
Spain	China	1.13
Spain	China	6769.6
Spain	China, Hong Kong SAR	1942.37
Spain	Colombia	5543.99
Spain	Costa Rica	3528.8
Spain	Croatia	42.928
Spain	Curaçao	105.862
Spain	Czechia	6248.3
Spain	Denmark	23.723
Spain	Dominican Rep.	628.057
Spain	Ecuador	8837.31
Spain	El Salvador	2342.16
Spain	France	4.78516e+06
Spain	France	4440.94
Spain	Germany	8.69913e+06
Spain	Germany	881.151
Spain	Ghana	601.295
Spain	Gibraltar	1718.24
Spain	Greece	4872.56
Spain	Guatemala	558.367
Spain	Honduras	38.409
Spain	Hungary	5.648
Spain	India	53369.7
Spain	Ireland	25.983
Spain	Israel	38.409
Spain	Italy	4.46312e+06
Spain	Italy	56096.6
Spain	Japan	2374.61
Spain	Jordan	134.376
Spain	Kazakhstan	105.422
Spain	Kuwait	191.006
Spain	Latvia	75.824
Spain	Latvia	7.908
Spain	Lebanon	216.402
Spain	Libya	86.387
Spain	Lithuania	7.908
Spain	Malaysia	276.139
Spain	Mexico	89158.7
Spain	Morocco	318.31
Spain	Netherlands	132.173
Spain	New Zealand	40.533
Spain	Norway	95.481
Spain	Panama	7213.14
Spain	Paraguay	463.169
Spain	Peru	76.818
Spain	Philippines	878.44
Spain	Poland	31097.9
Spain	Portugal	122662
Spain	Portugal	95226.2
Spain	Qatar	325.721
Spain	Rep. of Korea	55.354
Spain	Romania	933.455
Spain	Russian Federation	2393.57
Spain	Saudi Arabia	439.932
Spain	Slovakia	1738.11
Spain	Sweden	11.297
Spain	Switzerland	1.00903e+07
Spain	Switzerland	23.079
Spain	Türkiye	227.066
Spain	United Arab Emirates	310.256
Spain	United Kingdom	2.69598e+07
Spain	United Kingdom	482.611
Spain	Uruguay	750.56
Spain	USA	347.942
Spain	USA	84139.6
Spain	Venezuela	9.489
Sweden	China	107960
Sweden	Denmark	94010.9
Sweden	Denmark	234.441
Sweden	Estonia	5861.03
Sweden	Finland	516239
Sweden	Finland	1758.31
Sweden	Germany	10784.3
Sweden	Germany	7033.23
Sweden	India	234.441
Sweden	Malaysia	8205.44
Sweden	Norway	125895
Sweden	Norway	13480.4
Sweden	Poland	160592
Sweden	Romania	351.662
Sweden	Slovakia	37276.1
Sweden	Switzerland	588213
Sweden	Switzerland	117.221
Sweden	United Kingdom	117.221
Sweden	USA	1992.75
Sweden	USA	117.221
Switzerland	Andorra	4659.78
Switzerland	Aruba	7108.5
Switzerland	Australia	4.62664e+06
Switzerland	Austria	5.51276e+06
Switzerland	Bahrain	197831
Switzerland	Belgium	1.05029e+06
Switzerland	Belgium	10156.5
Switzerland	Brazil	385.945
Switzerland	Cambodia	2300.44
Switzerland	Canada	3.73774e+07
Switzerland	Canada	9887.31
Switzerland	China	9.92155e+07
Switzerland	China	5.078
Switzerland	China, Hong Kong SAR	2.09247e+08
Switzerland	China, Hong Kong SAR	4.95035e+06
Switzerland	Colombia	10240.8
Switzerland	Costa Rica	1.22184e+06
Switzerland	Croatia	202.113
Switzerland	Czechia	709527
Switzerland	Denmark	730209
Switzerland	Finland	304781
Switzerland	France	2.31583e+07
Switzerland	France	506652
Switzerland	Germany	1.95094e+08
Switzerland	Germany	224468
Switzerland	Greece	78377.4
Switzerland	Hungary	149355
Switzerland	India	141449
Switzerland	India	558401
Switzerland	Indonesia	1162.91
Switzerland	Iran	16785.6
Switzerland	Ireland	133238
Switzerland	Israel	131231
Switzerland	Italy	1.45861e+08
Switzerland	Italy	1.23415e+06
Switzerland	Japan	7.9934e+07
Switzerland	Lebanon	346235
Switzerland	Luxembourg	1.25191e+07
Switzerland	Malaysia	3.72619e+06
Switzerland	Mauritius	2862.09
Switzerland	Mexico	278.287
Switzerland	Netherlands	825926
Switzerland	Norway	10866.4
Switzerland	Other Asia, nes	56249.5
Switzerland	Poland	25.391
Switzerland	Portugal	250.864
Switzerland	Qatar	2.31937e+06
Switzerland	Rep. of Korea	2.2019e+06
Switzerland	Russian Federation	189574
Switzerland	Saudi Arabia	251477
Switzerland	Serbia	154.378
Switzerland	Singapore	1.66408e+06
Switzerland	South Africa	459082
Switzerland	Spain	563069
Switzerland	Spain	22726.1
Switzerland	Sweden	423634
Switzerland	Thailand	147593
Switzerland	Türkiye	71651.8
Switzerland	Türkiye	23740.7
Switzerland	United Arab Emirates	3.26694e+06
Switzerland	United Arab Emirates	247564
Switzerland	United Kingdom	1.73684e+08
Switzerland	United Kingdom	40781.2
Switzerland	USA	1.09419e+08
Switzerland	USA	1.01643e+06
Switzerland	Viet Nam	93014.8
Tajikistan	Russian Federation	2020
Thailand	Australia	74289
Thailand	Australia	1.61393e+06
Thailand	Austria	417261
Thailand	Canada	1.99
Thailand	China	129233
Thailand	China, Hong Kong SAR	450030
Thailand	China, Hong Kong SAR	188850
Thailand	France	47334.2
Thailand	France	9.98
Thailand	Germany	174437
Thailand	India	122720
Thailand	India	1201.97
Thailand	Japan	527662
Thailand	Japan	151404
Thailand	Jordan	479.96
Thailand	Lao People's Dem. Rep.	526911
Thailand	Malaysia	58897.9
Thailand	New Zealand	92.52
Thailand	Other Asia, nes	7833.98
Thailand	Romania	279.97
Thailand	Singapore	5129.74
Thailand	Singapore	2528.37
Thailand	Spain	302.89
Thailand	Switzerland	306.51
Thailand	Tunisia	11.7
Thailand	Türkiye	9571.93
Thailand	United Kingdom	384265
Thailand	United Kingdom	123.18
Thailand	USA	418696
Thailand	USA	29534.1
Thailand	Viet Nam	498.04
Tunisia	France	341.538
Tunisia	United Kingdom	1113.76
Türkiye	Algeria	1964
Türkiye	Austria	221
Türkiye	Azerbaijan	5836
Türkiye	France	207
Türkiye	Georgia	158
Türkiye	Germany	419889
Türkiye	Greece	8577
Türkiye	Iraq	705
Türkiye	Israel	483
Türkiye	Italy	35418
Türkiye	Kuwait	7388
Türkiye	Romania	3968
Türkiye	Saudi Arabia	5357
Türkiye	Switzerland	6514318
Türkiye	Togo	237
Türkiye	Turkmenistan	49235
Türkiye	United Kingdom	157171
Türkiye	USA	265209
Uganda	Dem. Rep. of the Congo	2674.19
Uganda	Kenya	2357.99
Uganda	USA	389.22
Ukraine	Germany	402582
Ukraine	Poland	64079.6
Ukraine	Poland	41.56
Ukraine	Russian Federation	29737.9
Ukraine	Switzerland	2.76597e+07
Ukraine	United Kingdom	67243.8
United Arab Emirates	Afghanistan	10130.7
United Arab Emirates	Bahrain	17644.9
United Arab Emirates	Belgium	1.23942e+06
United Arab Emirates	China	5745.68
United Arab Emirates	China, Hong Kong SAR	5027.91
United Arab Emirates	Egypt	502.927
United Arab Emirates	India	94909.7
United Arab Emirates	India	17263.2
United Arab Emirates	Iran	260667
United Arab Emirates	Iraq	7.95578e+06
United Arab Emirates	Iraq	102724
United Arab Emirates	Italy	10122.3
United Arab Emirates	Malaysia	4071.61
United Arab Emirates	Oman	8771.68
United Arab Emirates	Pakistan	5105.51
United Arab Emirates	Saudi Arabia	693.805
United Arab Emirates	Saudi Arabia	544.588
United Arab Emirates	Singapore	416700
United Arab Emirates	Singapore	2797.55
United Arab Emirates	Sri Lanka	29680
United Arab Emirates	Switzerland	2.45063e+06
United Arab Emirates	Tunisia	2043.29
United Arab Emirates	Türkiye	1.99899e+06
United Arab Emirates	United Kingdom	539056
United Arab Emirates	USA	1005.58
United Kingdom	Argentina	5.71491e+07
United Kingdom	Australia	2.12514e+07
United Kingdom	Austria	1.00434e+07
United Kingdom	Austria	10504.9
United Kingdom	Bahrain	10090
United Kingdom	Bahrain	285541
United Kingdom	Belgium	1.78192e+07
United Kingdom	Belgium	7380.01
United Kingdom	Belize	900509
United Kingdom	Brazil	118154
United Kingdom	Bulgaria	3.691e+06
United Kingdom	Bulgaria	3449.67
United Kingdom	Canada	1.64204e+06
United Kingdom	Chile	1.40227e+06
United Kingdom	China	3.29396e+08
United Kingdom	China	76320.7
United Kingdom	China, Hong Kong SAR	1.39495e+09
United Kingdom	China, Hong Kong SAR	676802
United Kingdom	Croatia	534.783
United Kingdom	Cyprus	713.903
United Kingdom	Cyprus	34554.7
United Kingdom	Czechia	1.29375e+07
United Kingdom	Czechia	41131.9
United Kingdom	Denmark	1.20228e+06
United Kingdom	Denmark	7105.53
United Kingdom	Estonia	22788.2
United Kingdom	Estonia	7390.32
United Kingdom	Finland	2.46564e+06
United Kingdom	Finland	2266.71
United Kingdom	France	1.47559e+07
United Kingdom	France	69820.8
United Kingdom	Georgia	1.3495e+06
United Kingdom	Germany	9.27297e+08
United Kingdom	Germany	148734
United Kingdom	Ghana	3844
United Kingdom	Gibraltar	16767.7
United Kingdom	Greece	6.53605e+06
United Kingdom	Greece	374.993
United Kingdom	Hungary	251500
United Kingdom	Hungary	22253.4
United Kingdom	India	1.1608e+08
United Kingdom	Ireland	2.05624e+08
United Kingdom	Ireland	337846
United Kingdom	Israel	2.34518e+06
United Kingdom	Italy	2.24012e+08
United Kingdom	Italy	125116
United Kingdom	Japan	2.67357e+08
United Kingdom	Japan	88258.6
United Kingdom	Kuwait	5708.65
United Kingdom	Latvia	2036.04
United Kingdom	Latvia	54831.4
United Kingdom	Lithuania	3.80629e+06
United Kingdom	Luxembourg	774873
United Kingdom	Luxembourg	427.827
United Kingdom	Malaysia	39296.9
United Kingdom	Malta	115.977
United Kingdom	Mexico	557434
United Kingdom	Netherlands	4.97982e+06
United Kingdom	Netherlands	13646.6
United Kingdom	New Zealand	5119.74
United Kingdom	North Macedonia	9.57732e+08
United Kingdom	Norway	6.61469e+06
United Kingdom	Other Asia, nes	5.66564e+06
United Kingdom	Pakistan	1.43215e+06
United Kingdom	Poland	1.57494e+07
United Kingdom	Poland	373.704
United Kingdom	Portugal	1.84191e+06
United Kingdom	Portugal	1963.88
United Kingdom	Rep. of Korea	1.01796e+08
United Kingdom	Romania	8.93599e+06
United Kingdom	Russian Federation	4.1709e+06
United Kingdom	Saudi Arabia	1.0412e+06
United Kingdom	Saudi Arabia	334732
United Kingdom	Singapore	3.15149e+06
United Kingdom	Slovakia	1.06836e+07
United Kingdom	Slovakia	1694.55
United Kingdom	Slovenia	477366
United Kingdom	South Africa	1.30464e+07
United Kingdom	Spain	1.24457e+07
United Kingdom	Spain	7859.38
United Kingdom	Sweden	4.45909e+06
United Kingdom	Sweden	262.881
United Kingdom	Switzerland	3.62489e+08
United Kingdom	Switzerland	41938.6
United Kingdom	Thailand	398881
United Kingdom	Türkiye	1.33411e+06
United Kingdom	Ukraine	482980
United Kingdom	United Arab Emirates	1.03663e+07
United Kingdom	United Arab Emirates	32931
United Kingdom	USA	4.62139e+08
United Kingdom	USA	126526
United Rep. of Tanzania	United Arab Emirates	20
USA	Antigua and Barbuda	17218
USA	Argentina	3284495
USA	Aruba	74158
USA	Australia	7574195
USA	Australia	130891
USA	Austria	40886
USA	Azerbaijan	11097
USA	Bahamas	98818
USA	Bahrain	847500
USA	Barbados	137726
USA	Belarus	198246
USA	Belgium	1591575
USA	Belgium	2700
USA	Bolivia (Plurinational State of)	6251
USA	Brazil	75359719
USA	Cambodia	4010
USA	Canada	226906498
USA	Canada	2082412
USA	Cayman Isds	39633
USA	Chile	6019
USA	China	189512005
USA	China	9633
USA	China, Hong Kong SAR	41636901
USA	China, Hong Kong SAR	3069219
USA	Colombia	453999
USA	Costa Rica	2116193
USA	Croatia	2758
USA	Curaçao	2533
USA	Czechia	1392094
USA	Denmark	395479
USA	Dominican Rep.	163749
USA	Estonia	64980
USA	Eswatini	7368
USA	Finland	127249
USA	France	3921998
USA	Germany	545672129
USA	Germany	56207
USA	Grenada	19035
USA	Guatemala	28338
USA	Haiti	6012
USA	Hungary	151015
USA	India	42926440
USA	India	25587
USA	Indonesia	4196
USA	Ireland	10732674
USA	Ireland	2670
USA	Israel	8375219
USA	Italy	212648361
USA	Italy	4113
USA	Jamaica	3425
USA	Japan	286938310
USA	Japan	1693799
USA	Kuwait	115805
USA	Lao People's Dem. Rep.	1041130
USA	Lebanon	73000
USA	Luxembourg	148873210
USA	Malaysia	54038
USA	Mexico	17596917
USA	Mexico	120079
USA	Netherlands	1019705
USA	New Zealand	901880
USA	New Zealand	9950
USA	Nicaragua	3045
USA	Norway	216501
USA	Other Asia, nes	51416831
USA	Other Asia, nes	8010
USA	Panama	9003
USA	Panama	6045
USA	Peru	189594
USA	Philippines	88652
USA	Poland	85766
USA	Poland	5037
USA	Qatar	9095
USA	Rep. of Korea	45580458
USA	Rep. of Korea	7656
USA	Rep. of Moldova	7531
USA	Romania	16631
USA	Russian Federation	1037960
USA	Saint Lucia	56239
USA	Saudi Arabia	713316
USA	Saudi Arabia	3500
USA	Singapore	69106060
USA	Singapore	21626
USA	Sint Maarten	391906
USA	Slovakia	850087
USA	South Africa	4895064
USA	Spain	143918
USA	Sweden	7400
USA	Sweden	3000
USA	Switzerland	442818862
USA	Switzerland	54008
USA	Thailand	5034339
USA	Thailand	428311
USA	Trinidad and Tobago	2804
USA	Türkiye	410244
USA	United Arab Emirates	632996
USA	United Arab Emirates	52500
USA	United Kingdom	31482462
USA	United Kingdom	131343
USA	United Rep. of Tanzania	5866
USA	Uruguay	234830
USA	Viet Nam	691246
Uzbekistan	Russian Federation	523669
Uzbekistan	USA	560
Viet Nam	Cambodia	19313.8
Viet Nam	China, Hong Kong SAR	20370.6
Viet Nam	Japan	260006
Viet Nam	Japan	596378
Viet Nam	Malaysia	44162.6
Viet Nam	Other Asia, nes	12628
Viet Nam	Rep. of Korea	769
Viet Nam	Singapore	58942.1
Viet Nam	Thailand	10001.1
Viet Nam	USA	45592.9
Zimbabwe	South Africa	4.59999e+07

## Sheet: 2018
source	target	weight
Andorra	France	2342.89
Andorra	Spain	29018.7
Andorra	Switzerland	35.498
Angola	Portugal	372.94
Antigua and Barbuda	USA	35.185
Armenia	China, Hong Kong SAR	3163.78
Armenia	Russian Federation	19025.7
Australia	Canada	91186.4
Australia	China	24951.2
Australia	China	2241.46
Australia	China, Hong Kong SAR	14542.6
Australia	China, Hong Kong SAR	918927
Australia	Fiji	73194.9
Australia	France	13519
Australia	Germany	102551
Australia	Indonesia	59421.9
Australia	Italy	52732.6
Australia	Japan	444.557
Australia	Malaysia	4740.69
Australia	Malaysia	5271.17
Australia	New Caledonia	113712
Australia	New Zealand	45890.9
Australia	New Zealand	318944
Australia	Papua New Guinea	25812.7
Australia	Philippines	28858.8
Australia	Portugal	13173.1
Australia	Senegal	1169.3
Australia	Singapore	98392
Australia	Singapore	225683
Australia	South Africa	23732.6
Australia	Switzerland	871144
Australia	Thailand	124216
Australia	United Arab Emirates	4641.32
Australia	United Arab Emirates	12171.1
Australia	United Kingdom	64479.4
Australia	United Kingdom	85177.8
Australia	USA	12116.6
Australia	USA	253431
Australia	Vanuatu	211087
Australia	Viet Nam	53968.4
Austria	Argentina	4204.51
Austria	Armenia	103.961
Austria	Australia	170488
Austria	Belgium	1.72699e+06
Austria	Belgium	3098.74
Austria	Bolivia (Plurinational State of)	3183.8
Austria	Bosnia Herzegovina	13832.7
Austria	Brazil	1968.17
Austria	Bulgaria	61659.4
Austria	Bulgaria	2626.19
Austria	Canada	1896.1
Austria	Chile	12018.1
Austria	China	621570
Austria	China	17480.8
Austria	China, Hong Kong SAR	143975
Austria	Croatia	1469.63
Austria	Czechia	1.79489e+06
Austria	Czechia	1847.67
Austria	Denmark	38973.5
Austria	Estonia	198.471
Austria	Finland	4379.35
Austria	France	616320
Austria	France	1894.92
Austria	Germany	1.03078e+08
Austria	Germany	149171
Austria	Greece	31684.4
Austria	Hungary	77280.7
Austria	Hungary	1956.35
Austria	Iran	10078.3
Austria	Ireland	142.946
Austria	Israel	32043.6
Austria	Italy	962809
Austria	Italy	22284.2
Austria	Japan	4523.48
Austria	Lithuania	1418.83
Austria	Luxembourg	1.65259e+06
Austria	Luxembourg	157.123
Austria	Malaysia	17088.6
Austria	Malta	97377.1
Austria	Netherlands	1.3007e+06
Austria	Poland	123765
Austria	Poland	8.27
Austria	Portugal	38538.8
Austria	Rep. of Korea	6234.11
Austria	Romania	21640.4
Austria	Romania	985.265
Austria	Russian Federation	10467
Austria	Russian Federation	684.015
Austria	Serbia	150.034
Austria	Slovakia	56892.6
Austria	Slovakia	25696.1
Austria	Slovenia	1.17163e+06
Austria	Slovenia	98.054
Austria	Spain	1937.45
Austria	Spain	734.814
Austria	Sweden	1.2149e+06
Austria	Sweden	6126.6
Austria	Switzerland	87549.2
Austria	Switzerland	9266.69
Austria	Türkiye	642985
Austria	United Kingdom	8.0775e+06
Austria	United Kingdom	379.221
Austria	USA	6.00064e+06
Austria	USA	20679.9
Bahrain	India	85399.9
Bahrain	Saudi Arabia	414.92
Bahrain	United Arab Emirates	1.02683e+06
Barbados	Antigua and Barbuda	837
Barbados	Saint Lucia	1799.5
Barbados	USA	416
Barbados	USA	702040
Belgium	Australia	42.595
Belgium	Austria	5252.62
Belgium	Bahrain	9004.55
Belgium	Brazil	3.3873e+06
Belgium	Bunkers	51776.5
Belgium	Canada	2514.8
Belgium	China	8.9532e+06
Belgium	China, Hong Kong SAR	8.31644e+06
Belgium	Denmark	1020.04
Belgium	France	2.29725e+06
Belgium	France	213.021
Belgium	Germany	7.19108e+08
Belgium	Germany	133.976
Belgium	Greece	8397.21
Belgium	India	41.59
Belgium	Iran	233.297
Belgium	Ireland	32786.1
Belgium	Israel	216.459
Belgium	Italy	3.4745e+07
Belgium	Japan	2.49008e+07
Belgium	Japan	10938.8
Belgium	Kenya	2578.55
Belgium	Latvia	365.323
Belgium	Luxembourg	463918
Belgium	Netherlands	31991
Belgium	Netherlands	515.107
Belgium	Nigeria	6597.98
Belgium	Nigeria	29847
Belgium	Other Asia, nes	10541.2
Belgium	Poland	948.759
Belgium	Portugal	12878
Belgium	Rep. of Korea	242.241
Belgium	Russian Federation	68.778
Belgium	Saudi Arabia	28014.5
Belgium	Slovakia	3414.91
Belgium	Slovenia	3394.07
Belgium	Spain	31217.1
Belgium	Sweden	322.539
Belgium	Switzerland	9.27093e+06
Belgium	Uganda	6897.41
Belgium	United Arab Emirates	725867
Belgium	United Kingdom	1.03443e+08
Belgium	USA	2.12945e+08
Belgium	USA	6908.13
Bermuda	China	964.5
Bolivia (Plurinational State of)	Dominican Rep.	4136.96
Bolivia (Plurinational State of)	USA	3142.3
Brazil	Argentina	169
Brazil	Belgium	234298
Brazil	Chile	381
Brazil	Colombia	106
Brazil	France	119
Brazil	Germany	2114046
Brazil	Germany	235
Brazil	Italy	232722
Brazil	Italy	373
Brazil	Japan	779
Brazil	Mexico	80
Brazil	Paraguay	28
Brazil	Peru	48
Brazil	Peru	124
Brazil	Spain	412
Brazil	United Kingdom	195
Brazil	Uruguay	147
Brazil	USA	5735
Brunei Darussalam	China, Hong Kong SAR	140.787
Brunei Darussalam	Singapore	1222.63
Bulgaria	Austria	19960.9
Bulgaria	Italy	73810
Bulgaria	Türkiye	26971.9
Bulgaria	USA	272.577
Cameroon	Belgium	65.746
Cameroon	Morocco	18.012
Canada	Argentina	11268.8
Canada	Australia	2790.57
Canada	Chile	16375.9
Canada	China	16761.9
Canada	China, Hong Kong SAR	380830
Canada	Denmark	1076.86
Canada	France	2873.93
Canada	Germany	2.64796e+07
Canada	Guatemala	1811.74
Canada	India	38175.5
Canada	India	3408.12
Canada	Italy	2463.26
Canada	Japan	6004.15
Canada	Luxembourg	30.878
Canada	Malaysia	154.388
Canada	Mexico	700456
Canada	Norway	4491.92
Canada	Panama	1246.68
Canada	Spain	1806.34
Canada	Switzerland	5474.6
Canada	Switzerland	6253.49
Canada	Trinidad and Tobago	781.204
Canada	Ukraine	1010.47
Canada	United Arab Emirates	4695.71
Canada	United Kingdom	23910.1
Canada	United Kingdom	28907.6
Canada	USA	2.62847e+08
Canada	USA	1.59294e+06
Chile	Paraguay	47.576
China	Albania	918
China	Algeria	4968
China	Argentina	2648
China	Armenia	25129
China	Aruba	31705
China	Australia	105239
China	Austria	32629
China	Bahamas	2600
China	Bangladesh	945
China	Belgium	3597
China	Brazil	73709
China	Bulgaria	10312
China	Cambodia	17
China	Canada	140572
China	Chile	3182
China	China, Hong Kong SAR	78639349
China	China, Hong Kong SAR	17099840
China	China, Macao SAR	49759
China	Colombia	18618
China	Curaçao	12822
China	Czechia	37317
China	Denmark	767
China	Ecuador	2026
China	Egypt	9065
China	Estonia	20968
China	Finland	39811
China	France	297041
China	Georgia	434
China	Germany	897388
China	Germany	538217
China	Ghana	6809
China	Greece	935
China	Hungary	20
China	India	58765
China	Indonesia	1539
China	Iraq	719
China	Ireland	1074
China	Israel	7862
China	Italy	7341969
China	Italy	44776
China	Jamaica	204
China	Japan	3078616
China	Japan	1068053
China	Kazakhstan	467
China	Kenya	824
China	Latvia	8803
China	Lithuania	22875
China	Luxembourg	93
China	Malaysia	51494
China	Mexico	42047
China	Montenegro	1840
China	Myanmar	200
China	Netherlands	16216
China	New Zealand	34999
China	Nigeria	5715
China	Norway	6306
China	Oman	386
China	Other Asia, nes	444
China	Other Asia, nes	36370
China	Pakistan	14
China	Panama	4420
China	Peru	724
China	Philippines	3089
China	Poland	7352
China	Portugal	28854
China	Qatar	8798
China	Rep. of Korea	65288
China	Rep. of Korea	368886
China	Romania	71367
China	Russian Federation	155
China	Saudi Arabia	10853
China	Singapore	65
China	Singapore	3059
China	South Africa	1976
China	Spain	365866
China	Sri Lanka	12
China	Sweden	112818
China	Switzerland	7808
China	Thailand	694
China	Thailand	14900
China	Türkiye	14391
China	Ukraine	852
China	United Arab Emirates	8518
China	United Kingdom	37295
China	United Kingdom	535310
China	United Rep. of Tanzania	28
China	Uruguay	9077
China	USA	60554
China	USA	3561419
China	Viet Nam	112990
China	Yemen	11933
China	Zambia	640
China, Hong Kong SAR	Australia	267068
China, Hong Kong SAR	Austria	65539.8
China, Hong Kong SAR	Bahrain	785.992
China, Hong Kong SAR	Bulgaria	12902.6
China, Hong Kong SAR	Canada	141799
China, Hong Kong SAR	China	1.04236e+09
China, Hong Kong SAR	China	2.19629e+06
China, Hong Kong SAR	China, Macao SAR	25773.3
China, Hong Kong SAR	Denmark	599.349
China, Hong Kong SAR	El Salvador	3920.01
China, Hong Kong SAR	Fiji	62379.8
China, Hong Kong SAR	Finland	764.177
China, Hong Kong SAR	France	623174
China, Hong Kong SAR	Germany	2.9145e+06
China, Hong Kong SAR	Germany	2.82519e+06
China, Hong Kong SAR	Gibraltar	3882.12
China, Hong Kong SAR	India	308591
China, Hong Kong SAR	India	72279.2
China, Hong Kong SAR	Indonesia	4509.28
China, Hong Kong SAR	Indonesia	375.71
China, Hong Kong SAR	Israel	3612.3
China, Hong Kong SAR	Italy	1459.97
China, Hong Kong SAR	Italy	600080
China, Hong Kong SAR	Japan	2.17311e+07
China, Hong Kong SAR	Japan	2.86088e+06
China, Hong Kong SAR	Kazakhstan	33056.8
China, Hong Kong SAR	Kuwait	1058.49
China, Hong Kong SAR	Malaysia	82786.1
China, Hong Kong SAR	Malaysia	140690
China, Hong Kong SAR	Mexico	34070.3
China, Hong Kong SAR	Netherlands	31225.6
China, Hong Kong SAR	New Zealand	24894.7
China, Hong Kong SAR	Norway	39756.6
China, Hong Kong SAR	Oceania, nes	4195.95
China, Hong Kong SAR	Other Asia, nes	2.82788e+07
China, Hong Kong SAR	Other Asia, nes	2.37134e+06
China, Hong Kong SAR	Panama	43175.6
China, Hong Kong SAR	Poland	210783
China, Hong Kong SAR	Qatar	86156.5
China, Hong Kong SAR	Rep. of Korea	1.2326e+06
China, Hong Kong SAR	Rep. of Korea	14983.5
China, Hong Kong SAR	Romania	13725.2
China, Hong Kong SAR	Saudi Arabia	31316.3
China, Hong Kong SAR	Seychelles	20935.1
China, Hong Kong SAR	Singapore	2.24485e+06
China, Hong Kong SAR	Singapore	699178
China, Hong Kong SAR	Slovakia	24129
China, Hong Kong SAR	South Africa	34747.6
China, Hong Kong SAR	Spain	143062
China, Hong Kong SAR	Sri Lanka	187197
China, Hong Kong SAR	Sweden	157612
China, Hong Kong SAR	Switzerland	1.46716e+06
China, Hong Kong SAR	Switzerland	1.24911e+06
China, Hong Kong SAR	Thailand	3.68459e+06
China, Hong Kong SAR	Thailand	6603.81
China, Hong Kong SAR	United Arab Emirates	495265
China, Hong Kong SAR	United Kingdom	7.72367e+06
China, Hong Kong SAR	United Kingdom	2.23647e+06
China, Hong Kong SAR	USA	1.02561e+06
China, Hong Kong SAR	USA	9.06574e+06
China, Hong Kong SAR	Viet Nam	24395.7
China, Hong Kong SAR	Viet Nam	39269.1
Colombia	Free Zones	103957
Colombia	Panama	119.16
Colombia	Russian Federation	108888
Colombia	Spain	2379.94
Colombia	Switzerland	611267
Colombia	USA	7.10976e+06
Costa Rica	Nicaragua	2.5
Costa Rica	Spain	86.4
Costa Rica	USA	490826
Côte d'Ivoire	France	15048.2
Croatia	Bulgaria	897
Croatia	France	735
Croatia	Germany	37095
Croatia	Serbia	430
Croatia	Spain	1
Czechia	Argentina	67775
Czechia	Australia	87698
Czechia	Austria	203491
Czechia	Austria	6505
Czechia	Belgium	1177937
Czechia	Brazil	130912
Czechia	Canada	46542
Czechia	Colombia	2966
Czechia	Croatia	36
Czechia	Denmark	8635
Czechia	Egypt	79963
Czechia	Estonia	2829
Czechia	France	808593
Czechia	France	18
Czechia	Germany	18181029
Czechia	Germany	126372
Czechia	Greece	4720
Czechia	Hungary	366
Czechia	India	561463
Czechia	Israel	77911
Czechia	Italy	1038264
Czechia	Italy	132
Czechia	Lithuania	5
Czechia	Luxembourg	15321
Czechia	Mexico	12683
Czechia	Netherlands	106063
Czechia	Other Asia, nes	5638
Czechia	Pakistan	11211
Czechia	Peru	12283
Czechia	Poland	768590
Czechia	Poland	1315
Czechia	Portugal	8166
Czechia	Romania	67452
Czechia	Romania	14
Czechia	Russian Federation	9403
Czechia	Serbia	19
Czechia	Slovakia	12548866
Czechia	Slovakia	50929
Czechia	Slovenia	41630
Czechia	Slovenia	11
Czechia	South Africa	29943
Czechia	Spain	116293
Czechia	Spain	49
Czechia	Switzerland	652172
Czechia	Switzerland	42761
Czechia	Thailand	60594
Czechia	Ukraine	162653
Czechia	United Kingdom	5168339
Czechia	United Kingdom	278
Czechia	USA	2148810
Czechia	USA	146
Czechia	Viet Nam	2012
Denmark	Australia	288.695
Denmark	Austria	56.06
Denmark	Austria	306.115
Denmark	Belgium	1863.93
Denmark	China, Hong Kong SAR	3393.08
Denmark	China, Hong Kong SAR	14010.5
Denmark	Cyprus	88.683
Denmark	Czechia	359.8
Denmark	Faeroe Isds	15.044
Denmark	Faeroe Isds	63.187
Denmark	Finland	12530.4
Denmark	France	2091.02
Denmark	Germany	909978
Denmark	Germany	7578.6
Denmark	Greece	231.368
Denmark	Greenland	84.249
Denmark	Hungary	168.34
Denmark	Iceland	341.113
Denmark	Ireland	1.584
Denmark	Italy	205.713
Denmark	Japan	57.961
Denmark	Lithuania	6314.4
Denmark	Luxembourg	251.955
Denmark	Netherlands	772.493
Denmark	Netherlands	4216.72
Denmark	Norway	6187.71
Denmark	Norway	14702.1
Denmark	Poland	405847
Denmark	Poland	521.805
Denmark	Slovenia	21.537
Denmark	Spain	968.863
Denmark	Sweden	176.891
Denmark	Sweden	3002.72
Denmark	Switzerland	7040.01
Denmark	Thailand	14532.2
Denmark	Thailand	2493.58
Denmark	United Kingdom	1713.01
Denmark	USA	2613.93
Dominican Rep.	USA	8.00051e+06
Dominican Rep.	USA	2948.69
Dominican Rep.	Venezuela	50
Egypt	Italy	126180
El Salvador	Spain	31.96
Estonia	Bulgaria	5644.12
Estonia	Finland	12602.2
Estonia	Finland	42720.8
Estonia	Greece	1409.02
Estonia	Hungary	6632.39
Estonia	Ireland	6409.39
Estonia	Latvia	35.397
Estonia	Latvia	102802
Estonia	Lithuania	30536.7
Estonia	Lithuania	173155
Estonia	USA	4266.12
Eswatini	Congo	5.605
Ethiopia	Djibouti	696.471
Ethiopia	USA	5517.67
Fiji	Tuvalu	14308.3
Fiji	USA	205234
Finland	Estonia	8204.57
Finland	Germany	7.47666e+06
Finland	Germany	386.652
Finland	Greenland	872.325
Finland	Lao People's Dem. Rep.	3677.91
Finland	Norway	26993.8
Finland	Sweden	21716.2
Finland	Switzerland	5170.3
Finland	United Kingdom	6.26549e+07
France	Australia	531.473
France	Austria	41717.1
France	Austria	25096.2
France	Belgium	382863
France	Belgium	59519.1
France	Brazil	1157.43
France	Canada	4891.91
France	China	75235.3
France	China	65318
France	China, Hong Kong SAR	1027.52
France	China, Hong Kong SAR	242561
France	Costa Rica	203638
France	Côte d'Ivoire	12767.2
France	Cyprus	455.886
France	Czechia	23459.2
France	Czechia	2952.63
France	Dem. Rep. of the Congo	321.246
France	Finland	4360.44
France	Germany	9.04868e+06
France	Germany	151397
France	Greece	5986.75
France	Guam	2059.75
France	Guinea	76484.9
France	India	256217
France	Ireland	33.069
France	Italy	6.70669e+07
France	Italy	164034
France	Japan	12447.1
France	Japan	1491.67
France	Lebanon	3454.57
France	Luxembourg	54641.3
France	Luxembourg	11845.9
France	Malaysia	257.469
France	Mauritius	5358.43
France	Mexico	43096.6
France	Morocco	102592
France	Netherlands	417115
France	Netherlands	23779.3
France	New Caledonia	1114.91
France	Norway	1354.67
France	Pakistan	65118.4
France	Panama	369.669
France	Poland	1679.45
France	Poland	10557.4
France	Portugal	62529.6
France	Portugal	76586.5
France	Qatar	881.064
France	Rep. of Korea	5373.78
France	Romania	6023.36
France	Russian Federation	39940.8
France	Saint Barthélemy	82.674
France	Saudi Arabia	18745.6
France	Singapore	11675.9
France	Singapore	1668.83
France	Spain	1.60326e+07
France	Spain	51906
France	Sweden	7047.33
France	Switzerland	1.39856e+07
France	Switzerland	1.12432e+06
France	Thailand	38384.2
France	Thailand	70296.2
France	Türkiye	14881.2
France	Türkiye	29255.8
France	United Arab Emirates	5941.87
France	United Kingdom	720830
France	United Kingdom	259682
France	USA	1.1883e+07
France	USA	385785
France	Viet Nam	107531
France	Viet Nam	857.443
French Polynesia	Canada	618.51
French Polynesia	Chile	435.229
French Polynesia	China, Hong Kong SAR	20260
French Polynesia	France	628334
French Polynesia	New Caledonia	50222.3
French Polynesia	Switzerland	13814.1
French Polynesia	United Kingdom	642.952
French Polynesia	USA	281466
French Polynesia	Wallis and Futuna Isds	35031.2
Germany	Albania	21546.7
Germany	Argentina	1.24781e+07
Germany	Australia	8.22822e+06
Germany	Australia	12603.5
Germany	Austria	6.1069e+07
Germany	Austria	631384
Germany	Bangladesh	1990.9
Germany	Belgium	2.5973e+08
Germany	Belgium	68943.2
Germany	Brazil	2.63971e+08
Germany	Bulgaria	38488.8
Germany	Bulgaria	3235.07
Germany	Bunkers	34922.9
Germany	Canada	3.30153e+07
Germany	Canada	7685.95
Germany	Chile	10716.6
Germany	Chile	20180.8
Germany	China	2.25703e+08
Germany	China	63350.9
Germany	China, Hong Kong SAR	1.28179e+07
Germany	China, Hong Kong SAR	72279.9
Germany	Colombia	2552.14
Germany	Croatia	67239.4
Germany	Cuba	729.014
Germany	Cyprus	23925.1
Germany	Czechia	4.66623e+06
Germany	Czechia	137966
Germany	Dem. Rep. of the Congo	12441.7
Germany	Denmark	7.00832e+06
Germany	Denmark	23073.2
Germany	Dominican Rep.	3837.66
Germany	Egypt	1332.78
Germany	Estonia	621.493
Germany	Finland	1.05813e+06
Germany	Finland	12520.8
Germany	France	1.44397e+08
Germany	France	141502
Germany	Georgia	2953.86
Germany	Gibraltar	1238.26
Germany	Greece	54334.6
Germany	Greece	1616.35
Germany	Hungary	919101
Germany	Hungary	10514.6
Germany	Iceland	124447
Germany	Iceland	567.142
Germany	India	5.26371e+07
Germany	India	55544.5
Germany	Iran	5.24894e+06
Germany	Ireland	5.83268e+07
Germany	Ireland	1031.49
Germany	Israel	345658
Germany	Italy	9.15854e+07
Germany	Italy	37624
Germany	Japan	9.19684e+07
Germany	Japan	9055.36
Germany	Jordan	8383.07
Germany	Kazakhstan	1330.42
Germany	Kuwait	42907.8
Germany	Latvia	2.53663e+06
Germany	Lithuania	12608.3
Germany	Lithuania	18148.5
Germany	Luxembourg	788664
Germany	Luxembourg	31178.6
Germany	Malaysia	1.9299e+06
Germany	Malta	422.993
Germany	Mauritius	8055.78
Germany	Mexico	350263
Germany	Netherlands	1.69197e+07
Germany	Netherlands	127797
Germany	New Zealand	491178
Germany	North Macedonia	848.35
Germany	Norway	7.17085e+06
Germany	Norway	137565
Germany	Other Asia, nes	7.66914e+06
Germany	Other Asia, nes	1266.62
Germany	Pakistan	202.044
Germany	Poland	2.82044e+07
Germany	Poland	124979
Germany	Portugal	102591
Germany	Portugal	7591.43
Germany	Qatar	1090.57
Germany	Qatar	73802.9
Germany	Rep. of Korea	4.97312e+07
Germany	Romania	153166
Germany	Romania	63132.3
Germany	Russian Federation	126809
Germany	Russian Federation	805.814
Germany	Saudi Arabia	319031
Germany	Serbia	1.01432e+06
Germany	Singapore	2.04467e+07
Germany	Singapore	6379.16
Germany	Slovakia	4.09603e+06
Germany	Slovakia	10423.6
Germany	Slovenia	120563
Germany	Slovenia	1520.65
Germany	South Africa	5.49485e+07
Germany	South Africa	7010.11
Germany	Spain	2.01182e+07
Germany	Spain	27007.8
Germany	Sweden	4.36457e+06
Germany	Sweden	10612.6
Germany	Switzerland	1.21602e+08
Germany	Switzerland	1.37028e+06
Germany	Thailand	1.304e+07
Germany	Thailand	24458
Germany	Türkiye	1.30457e+06
Germany	Ukraine	1.47413e+06
Germany	United Arab Emirates	108902
Germany	United Arab Emirates	4784.08
Germany	United Kingdom	1.05265e+08
Germany	United Kingdom	173622
Germany	USA	1.33534e+09
Germany	USA	196648
Germany	Viet Nam	443866
Greece	Austria	20821.9
Greece	Canada	234.895
Greece	Cyprus	25.968
Greece	France	79.085
Greece	Germany	10917.3
Greece	Spain	1458.95
Greece	Switzerland	937.22
Guatemala	Antigua and Barbuda	187
Hungary	Austria	91971
Hungary	Belgium	18753
Hungary	Bosnia Herzegovina	18
Hungary	Croatia	3218
Hungary	Czechia	629051
Hungary	Germany	905350
Hungary	Montenegro	105
Hungary	Poland	34788
Hungary	Serbia	417
Hungary	Slovakia	17856
Hungary	Slovenia	386
India	Australia	172.103
India	Bhutan	19501
India	Canada	73.648
India	China, Hong Kong SAR	1107.18
India	China, Hong Kong SAR	3.888
India	Egypt	82.112
India	France	8921.3
India	Germany	1433.83
India	Iran	4653.48
India	Israel	9612.01
India	Italy	307886
India	Italy	303.347
India	Kuwait	11079.4
India	Mauritius	20.32
India	Mexico	227750
India	Nepal	340.405
India	New Zealand	1956.59
India	Nigeria	117.444
India	Rep. of Korea	1.20971e+06
India	Singapore	870980
India	Singapore	5638.32
India	Spain	14388.9
India	Thailand	175.304
India	United Arab Emirates	6620.56
India	United Kingdom	1.53419e+07
India	United Kingdom	17447.1
India	USA	4.26328e+06
India	USA	12142.9
Indonesia	Australia	84232.9
Indonesia	China	856248
Indonesia	China, Hong Kong SAR	91979
Indonesia	Japan	55680
Indonesia	Papua New Guinea	59.05
Indonesia	Singapore	394.24
Indonesia	Singapore	7344.44
Indonesia	United Arab Emirates	175.04
Indonesia	USA	5617.03
Ireland	China	123678
Ireland	France	10091.3
Ireland	Germany	110910
Ireland	Italy	104625
Ireland	New Zealand	642.439
Ireland	Russian Federation	4123.89
Ireland	South Africa	3234.63
Ireland	Switzerland	716.839
Ireland	Thailand	532.61
Ireland	United Kingdom	186718
Ireland	United Kingdom	4186.48
Ireland	USA	476051
Israel	Australia	12000
Israel	Germany	1000
Israel	USA	17000
Israel	USA	14000
Italy	Australia	204821
Italy	Austria	1.14491e+06
Italy	Austria	2415.59
Italy	Bahrain	5274.36
Italy	Belgium	4.96346e+07
Italy	Belgium	3128.22
Italy	Brazil	31919.2
Italy	Bulgaria	51015.8
Italy	Bulgaria	1219.61
Italy	Canada	109431
Italy	Chile	4404.56
Italy	China	7624.95
Italy	China	3647.03
Italy	China, Hong Kong SAR	1.29215e+07
Italy	Colombia	105607
Italy	Croatia	1.16547e+06
Italy	Croatia	6505.79
Italy	Cyprus	1002.16
Italy	Cyprus	4536.92
Italy	Czechia	3.45319e+06
Italy	Czechia	1598.97
Italy	Denmark	911.165
Italy	Denmark	849.712
Italy	Estonia	118.18
Italy	Finland	2.62771e+06
Italy	France	6.79551e+07
Italy	France	80504
Italy	Germany	6.07705e+08
Italy	Germany	8948.57
Italy	Greece	467602
Italy	Greece	10415.2
Italy	Hungary	269672
Italy	Hungary	633.443
Italy	Iceland	9457.92
Italy	India	6.22807e+06
Italy	Indonesia	1555.24
Italy	Ireland	670786
Italy	Ireland	48224.4
Italy	Israel	19541
Italy	Japan	16877.2
Italy	Japan	82510.7
Italy	Latvia	224169
Italy	Latvia	6233.98
Italy	Lithuania	572117
Italy	Lithuania	334.449
Italy	Luxembourg	1789.24
Italy	Luxembourg	228.087
Italy	Malta	354765
Italy	Malta	1539.88
Italy	Mexico	1.06829e+06
Italy	Mexico	1985.42
Italy	Netherlands	1.65658e+07
Italy	Netherlands	3888.11
Italy	New Caledonia	4135.11
Italy	New Zealand	26330.4
Italy	Norway	112416
Italy	Other Asia, nes	1772.69
Italy	Other Europe, nes	3356.3
Italy	Peru	8404.94
Italy	Poland	2.10628e+08
Italy	Poland	1328.34
Italy	Portugal	776114
Italy	Portugal	5527.26
Italy	Rep. of Korea	17598.1
Italy	Romania	505524
Italy	Romania	13487.8
Italy	Russian Federation	29372.4
Italy	Russian Federation	52983.5
Italy	Saudi Arabia	54158.2
Italy	Singapore	4289.92
Italy	Slovakia	765621
Italy	Slovakia	781.168
Italy	Slovenia	6206.8
Italy	Slovenia	2770.13
Italy	South Africa	259079
Italy	Spain	5.59358e+07
Italy	Spain	29856.9
Italy	Sweden	2.83656e+06
Italy	Switzerland	2.74027e+08
Italy	Switzerland	1.22586e+06
Italy	Thailand	2.17859e+06
Italy	Türkiye	348439
Italy	United Arab Emirates	254916
Italy	United Kingdom	2.48457e+08
Italy	United Kingdom	147949
Italy	USA	2.17576e+08
Italy	USA	8981.66
Italy	Viet Nam	161136
Japan	Australia	208162
Japan	Australia	13707.7
Japan	Austria	1.13855e+07
Japan	Bahrain	1.29427e+06
Japan	Belgium	248660
Japan	Bulgaria	755357
Japan	Canada	878781
Japan	China	9.29189e+07
Japan	China	1.38659e+06
Japan	China, Hong Kong SAR	1.9959e+08
Japan	China, Hong Kong SAR	1.67289e+07
Japan	China, Macao SAR	2.63447e+06
Japan	Cyprus	2210.63
Japan	Czechia	41068.8
Japan	Fiji	19125.6
Japan	Finland	2690.81
Japan	France	1.83545e+06
Japan	France	34282.9
Japan	Germany	4.85803e+07
Japan	Germany	2482.43
Japan	Hungary	12113.2
Japan	India	81512.6
Japan	Indonesia	10872
Japan	Italy	165933
Japan	Italy	255382
Japan	Malaysia	1.29845e+08
Japan	Malaysia	8108.67
Japan	Malta	539385
Japan	Mexico	105032
Japan	Netherlands	32860.5
Japan	New Zealand	2.13429e+06
Japan	New Zealand	4702.12
Japan	Other Asia, nes	8.12048e+07
Japan	Other Asia, nes	234898
Japan	Philippines	816140
Japan	Philippines	12403.1
Japan	Portugal	45915.9
Japan	Rep. of Korea	5.47266e+07
Japan	Rep. of Korea	20856.1
Japan	Singapore	8.19879e+07
Japan	Singapore	298879
Japan	Slovakia	13073.5
Japan	South Africa	116683
Japan	Sri Lanka	8978.43
Japan	Switzerland	3.96468e+06
Japan	Switzerland	16543.5
Japan	Thailand	5.00288e+07
Japan	Thailand	25802.8
Japan	Türkiye	1.11767e+06
Japan	United Arab Emirates	1984.13
Japan	United Kingdom	1.02705e+08
Japan	United Kingdom	155161
Japan	USA	5.51837e+07
Japan	USA	229643
Japan	Viet Nam	6.10575e+06
Kazakhstan	Kyrgyzstan	380.92
Kazakhstan	Switzerland	4108.89
Kenya	United Rep. of Tanzania	146.303
Kuwait	Bahrain	10970
Kuwait	United Arab Emirates	384
Kyrgyzstan	Kazakhstan	86
Latvia	Estonia	454.072
Latvia	Germany	194124
Latvia	United Kingdom	99848.7
Lebanon	France	160628
Lebanon	Switzerland	2.87558e+06
Lithuania	Estonia	4695
Lithuania	Finland	1430
Lithuania	Latvia	4197
Luxembourg	Belgium	1375.83
Luxembourg	France	2.19193e+06
Luxembourg	France	842.666
Luxembourg	Germany	280889
Luxembourg	Germany	739.18
Luxembourg	Italy	219.904
Luxembourg	Rep. of Korea	23.617
Luxembourg	Türkiye	72.848
Luxembourg	USA	60270.9
Madagascar	France	39.197
Malaysia	France	14995.6
Malaysia	Japan	2.06478e+06
Malaysia	Other Asia, nes	355192
Malaysia	Singapore	202880
Malaysia	Switzerland	3108.95
Malaysia	Thailand	50160
Malaysia	USA	82857.1
Malta	Switzerland	57831.6
Mauritius	Romania	5370.39
Mauritius	Switzerland	130626
Mauritius	United Arab Emirates	5577.73
Mexico	Spain	2254
Mexico	USA	8213021
Namibia	Germany	802.018
Namibia	South Africa	256.322
Netherlands	Austria	181699
Netherlands	Austria	74.391
Netherlands	Azerbaijan	289.298
Netherlands	Barbados	756.897
Netherlands	Belgium	738970
Netherlands	Belgium	24024.7
Netherlands	Bulgaria	55.498
Netherlands	Bulgaria	5.904
Netherlands	Bunkers	539.628
Netherlands	China	195832
Netherlands	China	984.792
Netherlands	Croatia	57.86
Netherlands	Cyprus	34.243
Netherlands	Cyprus	185.387
Netherlands	Czechia	35.424
Netherlands	Czechia	92.103
Netherlands	Denmark	26882.2
Netherlands	Denmark	185.387
Netherlands	Estonia	70.848
Netherlands	Estonia	55.498
Netherlands	Finland	21480
Netherlands	Finland	11.808
Netherlands	France	48238.3
Netherlands	France	22170.8
Netherlands	Germany	8.51549e+06
Netherlands	Germany	12254.4
Netherlands	Greece	209.003
Netherlands	Greece	2.362
Netherlands	Hungary	138.154
Netherlands	Hungary	172.398
Netherlands	Ireland	49.594
Netherlands	Ireland	126.346
Netherlands	Italy	9359.07
Netherlands	Italy	5090.46
Netherlands	Kuwait	1451.21
Netherlands	Latvia	35.424
Netherlands	Latvia	2.362
Netherlands	Lithuania	24.797
Netherlands	Lithuania	2.362
Netherlands	Luxembourg	167811
Netherlands	Luxembourg	1.181
Netherlands	Malta	62.583
Netherlands	Norway	240.884
Netherlands	Pakistan	2387.59
Netherlands	Poland	1075.71
Netherlands	Poland	447.526
Netherlands	Portugal	101.549
Netherlands	Portugal	7.085
Netherlands	Romania	318.818
Netherlands	Romania	7.085
Netherlands	Singapore	3553.05
Netherlands	Slovakia	871.435
Netherlands	Slovakia	1.181
Netherlands	Slovenia	249.15
Netherlands	Slovenia	5.904
Netherlands	Spain	19838.7
Netherlands	Spain	495.939
Netherlands	Sweden	289.298
Netherlands	Sweden	1644.86
Netherlands	Ukraine	481.769
Netherlands	United Arab Emirates	2329.73
Netherlands	United Kingdom	193362
Netherlands	United Kingdom	2124.27
Netherlands	USA	322610
New Zealand	Australia	1.55306e+06
New Zealand	Australia	19547.4
New Zealand	Germany	544756
New Zealand	Italy	6354.11
New Zealand	Thailand	544233
New Zealand	USA	115176
New Zealand	USA	7726.79
Norway	Germany	5575.9
Norway	Germany	1105.59
Norway	Italy	48649.1
Norway	Japan	5.34334e+07
Norway	Malta	1109.52
Norway	Rep. of Korea	3.68369e+07
Norway	Sweden	753529
Norway	Sweden	758.83
Norway	Switzerland	5.08262e+06
Norway	United Kingdom	6.62762e+07
Norway	USA	1.06827e+08
Oman	Qatar	673.602
Oman	United Arab Emirates	3040.31
Other Asia, nes	Areas, nes	297605
Other Asia, nes	Australia	15152.1
Other Asia, nes	China	2.88646e+07
Other Asia, nes	China	202979
Other Asia, nes	China, Hong Kong SAR	4.48663e+06
Other Asia, nes	China, Hong Kong SAR	52850.2
Other Asia, nes	France	1724.09
Other Asia, nes	Germany	6.01613e+06
Other Asia, nes	Indonesia	16611
Other Asia, nes	Indonesia	265.24
Other Asia, nes	Iran	465009
Other Asia, nes	Japan	4.13017e+07
Other Asia, nes	Japan	13229.1
Other Asia, nes	Malaysia	4.66099e+07
Other Asia, nes	New Zealand	4840.73
Other Asia, nes	Philippines	234577
Other Asia, nes	Rep. of Korea	140381
Other Asia, nes	Saudi Arabia	3448.19
Other Asia, nes	Singapore	1.0955e+08
Other Asia, nes	South Africa	7824.73
Other Asia, nes	Switzerland	5.85845e+06
Other Asia, nes	United Kingdom	2.41725e+06
Other Asia, nes	USA	2.15028e+07
Peru	Austria	468
Peru	Brazil	735663
Peru	Chile	1641.95
Peru	Cuba	158.17
Peru	Switzerland	10116.2
Peru	Türkiye	25
Philippines	Australia	24950
Philippines	Bolivia (Plurinational State of)	6990
Philippines	Canada	312
Philippines	China, Hong Kong SAR	3381429
Philippines	France	2930
Philippines	Japan	32377
Philippines	Japan	1040983
Philippines	Peru	17370
Philippines	Singapore	38440
Philippines	United Kingdom	4813
Philippines	USA	1313451
Poland	Areas, nes	2234
Poland	Austria	106
Poland	Belgium	46
Poland	China	214
Poland	Croatia	63
Poland	Czechia	44542
Poland	Denmark	37
Poland	Denmark	57
Poland	Estonia	2108189
Poland	Estonia	46
Poland	France	200
Poland	France	4
Poland	Georgia	423
Poland	Germany	23419483
Poland	Germany	98
Poland	Hungary	40315
Poland	Iceland	8
Poland	India	10837
Poland	Ireland	4
Poland	Italy	2802467
Poland	Italy	4017
Poland	Japan	787
Poland	Kazakhstan	423
Poland	Latvia	59
Poland	Lithuania	15558
Poland	Luxembourg	55
Poland	Netherlands	97
Poland	Romania	85585
Poland	Russian Federation	1287
Poland	Slovakia	34
Poland	Slovenia	52
Poland	Spain	20503
Poland	Sweden	62
Poland	Türkiye	12792
Poland	Ukraine	4113
Poland	United Kingdom	377684
Poland	United Kingdom	24
Poland	USA	389
Poland	USA	2475
Portugal	Austria	925.337
Portugal	China, Hong Kong SAR	309.627
Portugal	Germany	3.90644e+06
Portugal	Italy	7.0772e+06
Portugal	Spain	56371.1
Portugal	Spain	17837.8
Rep. of Korea	Australia	318
Rep. of Korea	China	3146105
Rep. of Korea	China	14628
Rep. of Korea	China, Hong Kong SAR	1944156
Rep. of Korea	China, Hong Kong SAR	4232
Rep. of Korea	Germany	5393658
Rep. of Korea	Indonesia	620512
Rep. of Korea	Israel	414665
Rep. of Korea	Japan	9827630
Rep. of Korea	Japan	23564
Rep. of Korea	Malaysia	3050
Rep. of Korea	Other Asia, nes	8316310
Rep. of Korea	Singapore	4785678
Rep. of Korea	Switzerland	4526176
Rep. of Korea	Thailand	15337
Rep. of Korea	Thailand	6279
Rep. of Korea	United Arab Emirates	90536
Rep. of Korea	United Kingdom	32433707
Rep. of Korea	USA	31051216
Rep. of Korea	USA	50831
Rep. of Korea	Viet Nam	936699
Russian Federation	Belarus	16498389
Russian Federation	Belarus	2816
Russian Federation	Canada	310165
Russian Federation	China	299543
Russian Federation	China, Hong Kong SAR	1.88119e+08
Russian Federation	Czechia	1.00091e+07
Russian Federation	Georgia	947.55
Russian Federation	Germany	5.26828e+08
Russian Federation	Italy	3.01704e+08
Russian Federation	Japan	6.89479e+08
Russian Federation	Kazakhstan	335721
Russian Federation	Kazakhstan	2389
Russian Federation	Kyrgyzstan	823
Russian Federation	Kyrgyzstan	16
Russian Federation	Poland	34094.8
Russian Federation	Rep. of Korea	1.60368e+08
Russian Federation	Rep. of Moldova	10310.4
Russian Federation	Switzerland	1.65049e+08
Russian Federation	Ukraine	144150
Russian Federation	United Kingdom	4.37441e+08
Russian Federation	United Kingdom	44.83
Russian Federation	USA	1.14827e+09
Russian Federation	Uzbekistan	594.57
Rwanda	Dem. Rep. of the Congo	543.145
Saint Lucia	USA	39997
Saudi Arabia	United Kingdom	5017.07
Senegal	Canada	6.741
Senegal	USA	32.356
Serbia	Italy	129
Serbia	Switzerland	1087357
Serbia	United Kingdom	791179
Singapore	Australia	233192
Singapore	Australia	5749.36
Singapore	Austria	50803.1
Singapore	Belgium	864.737
Singapore	China	129282
Singapore	China	1659.08
Singapore	China, Hong Kong SAR	5.45841e+06
Singapore	China, Hong Kong SAR	98010.3
Singapore	Denmark	14448.6
Singapore	Germany	2.85294e+06
Singapore	India	79695.2
Singapore	Indonesia	250005
Singapore	Indonesia	35456.5
Singapore	Italy	85924.7
Singapore	Japan	5.21866e+06
Singapore	Japan	132090
Singapore	Malaysia	164884
Singapore	Malaysia	1038.13
Singapore	Myanmar	852.141
Singapore	Netherlands	1790.98
Singapore	Other Asia, nes	2.27371e+06
Singapore	Philippines	2297.82
Singapore	Rep. of Korea	4111.76
Singapore	Switzerland	1.43231e+06
Singapore	Thailand	6320.66
Singapore	Thailand	28673.4
Singapore	Türkiye	1111.49
Singapore	United Arab Emirates	5944.24
Singapore	United Kingdom	1.63931e+07
Singapore	USA	2.60253e+07
Singapore	USA	87686.8
Singapore	Viet Nam	195.622
Singapore	Viet Nam	2519.37
Slovakia	Austria	4256.16
Slovakia	Czechia	239529
Slovakia	Czechia	133.448
Slovakia	Germany	1.21416e+06
Slovakia	Hungary	7.90049e+06
Slovakia	Italy	7888.77
Slovakia	Japan	113797
Slovakia	United Kingdom	5.98264e+07
Slovenia	Austria	127684
Slovenia	Bosnia Herzegovina	7734.04
Slovenia	Bulgaria	1040.74
Slovenia	Bulgaria	310.1
Slovenia	Croatia	4417.33
Slovenia	Croatia	32132.4
Slovenia	Germany	32029.5
Slovenia	Montenegro	2071.43
Slovenia	Serbia	7600.56
Slovenia	USA	1030.99
South Africa	Belgium	3.20732e+06
South Africa	Botswana	182.5
South Africa	Botswana	1896.9
South Africa	China	9.36471e+07
South Africa	China, Hong Kong SAR	5.46423e+08
South Africa	Czechia	962182
South Africa	Eswatini	85.252
South Africa	Eswatini	161.828
South Africa	France	1.26277e+07
South Africa	Germany	8.11294e+08
South Africa	Ghana	12.524
South Africa	India	2.59641e+07
South Africa	Italy	9.34209e+06
South Africa	Japan	2.0412e+09
South Africa	Kenya	998.884
South Africa	Lebanon	1.8866e+06
South Africa	Lesotho	122.22
South Africa	Mauritius	246.402
South Africa	Mozambique	21.653
South Africa	Namibia	7625.47
South Africa	Namibia	4888.35
South Africa	Other Asia, nes	9.55891e+07
South Africa	Qatar	442.859
South Africa	Rep. of Korea	2.22729e+07
South Africa	Switzerland	3.14875e+08
South Africa	Uganda	43.381
South Africa	United Arab Emirates	4.18843e+06
South Africa	United Kingdom	2.04332e+09
South Africa	United Rep. of Tanzania	161.677
South Africa	USA	1.81432e+09
South Africa	Zambia	384.088
South Africa	Zimbabwe	23594.9
Spain	Andorra	1700.68
Spain	Andorra	14768.1
Spain	Areas, nes	43051.2
Spain	Argentina	185.198
Spain	Aruba	107.675
Spain	Australia	4727.77
Spain	Australia	1376.38
Spain	Austria	581.515
Spain	Bahrain	175.164
Spain	Belgium	2001.03
Spain	Bolivia (Plurinational State of)	496.628
Spain	Bosnia Herzegovina	354.488
Spain	Bulgaria	1087.39
Spain	Bulgaria	1296.48
Spain	Bunkers	1170.12
Spain	Canada	2738.38
Spain	Chile	38618.1
Spain	China	22884.8
Spain	China, Hong Kong SAR	2271.34
Spain	Colombia	28973
Spain	Costa Rica	1270.17
Spain	Croatia	1046.02
Spain	Curaçao	409.165
Spain	Cyprus	1051.93
Spain	Czechia	11300.8
Spain	Denmark	202.112
Spain	Dominican Rep.	967.667
Spain	Ecuador	4115.72
Spain	Egypt	1294.93
Spain	El Salvador	2217.78
Spain	Equatorial Guinea	62.016
Spain	Finland	210.386
Spain	France	6.85731e+06
Spain	France	11243
Spain	Germany	6.81869e+06
Spain	Germany	5389.17
Spain	Ghana	68.458
Spain	Gibraltar	529.143
Spain	Greece	9641.61
Spain	Guatemala	1609.82
Spain	Honduras	355.764
Spain	Hungary	365.22
Spain	India	42963.9
Spain	India	762.471
Spain	Indonesia	297.164
Spain	Ireland	1155.94
Spain	Israel	515.374
Spain	Italy	1.03195e+06
Spain	Italy	70553.4
Spain	Japan	3129.24
Spain	Kuwait	2341.25
Spain	Lebanon	1833.1
Spain	Lithuania	67.371
Spain	Luxembourg	242.298
Spain	Malaysia	902.483
Spain	Malta	75.644
Spain	Mexico	172157
Spain	Morocco	257.202
Spain	Netherlands	3598.04
Spain	Netherlands	1697.27
Spain	North Macedonia	79.048
Spain	Norway	274.884
Spain	Other Asia, nes	67.796
Spain	Panama	10602.7
Spain	Paraguay	292.105
Spain	Peru	747.814
Spain	Philippines	1685.05
Spain	Poland	68745.5
Spain	Portugal	46964.5
Spain	Portugal	141593
Spain	Qatar	1270.88
Spain	Rep. of Korea	1474
Spain	Romania	1301.08
Spain	Russian Federation	2652.66
Spain	Saudi Arabia	3469.97
Spain	Serbia	111.433
Spain	Singapore	729.991
Spain	Slovakia	2358.54
Spain	Slovenia	80.372
Spain	South Africa	701.577
Spain	Sweden	516.509
Spain	Switzerland	1322.71
Spain	Thailand	1032.97
Spain	Türkiye	4892.23
Spain	Ukraine	196.261
Spain	United Arab Emirates	4448.91
Spain	United Kingdom	3.00844e+07
Spain	United Kingdom	11990.8
Spain	Uruguay	455.709
Spain	USA	120098
Spain	Viet Nam	249.342
State of Palestine	Israel	8268.95
Sweden	Belgium	575.638
Sweden	Canada	2878.19
Sweden	China	333294
Sweden	Denmark	97397.9
Sweden	Denmark	345.383
Sweden	Estonia	6562.27
Sweden	Estonia	575.638
Sweden	Finland	461547
Sweden	Finland	5986.64
Sweden	Germany	291848
Sweden	Germany	4374.85
Sweden	Iceland	115.128
Sweden	India	1036.15
Sweden	Indonesia	230.255
Sweden	Malaysia	21759.1
Sweden	Norway	662559
Sweden	Norway	6562.27
Sweden	Poland	166935
Sweden	Switzerland	345.383
Sweden	United Kingdom	347455
Sweden	United Kingdom	460.51
Sweden	USA	2878.19
Switzerland	Aruba	10209.1
Switzerland	Australia	5.26296e+06
Switzerland	Austria	2.10014e+07
Switzerland	Austria	31964.1
Switzerland	Belgium	3.60463e+06
Switzerland	Brazil	25782
Switzerland	Canada	2.9816e+07
Switzerland	China	4.88111e+07
Switzerland	China	49.097
Switzerland	China, Hong Kong SAR	1.84483e+08
Switzerland	China, Hong Kong SAR	5.28165e+06
Switzerland	Costa Rica	1.63634e+06
Switzerland	Czechia	696251
Switzerland	Denmark	598977
Switzerland	Denmark	185.136
Switzerland	Finland	300364
Switzerland	France	2.4388e+07
Switzerland	France	125006
Switzerland	Germany	1.58046e+08
Switzerland	Germany	435972
Switzerland	Greece	66453.5
Switzerland	Hungary	506763
Switzerland	India	660218
Switzerland	Indonesia	2757.6
Switzerland	Ireland	173959
Switzerland	Israel	60476
Switzerland	Italy	1.71724e+08
Switzerland	Italy	1.20493e+06
Switzerland	Japan	5.96991e+07
Switzerland	Lebanon	323307
Switzerland	Luxembourg	3.05669e+06
Switzerland	Malaysia	4.76839e+06
Switzerland	Malaysia	93212.3
Switzerland	Mauritius	778.389
Switzerland	Netherlands	1.9415e+06
Switzerland	Norway	9441.93
Switzerland	Other Asia, nes	6.137
Switzerland	Pakistan	252.644
Switzerland	Poland	4627.37
Switzerland	Qatar	235.255
Switzerland	Rep. of Korea	2.69488e+06
Switzerland	Romania	4320.52
Switzerland	Russian Federation	1.68004e+06
Switzerland	Saudi Arabia	104758
Switzerland	Singapore	3.56006e+06
Switzerland	Slovakia	16233.6
Switzerland	South Africa	415730
Switzerland	Spain	445502
Switzerland	Spain	4697.95
Switzerland	Sweden	385946
Switzerland	Thailand	52633.8
Switzerland	Türkiye	983311
Switzerland	United Arab Emirates	3.97146e+06
Switzerland	United Arab Emirates	317629
Switzerland	United Kingdom	2.14252e+08
Switzerland	United Kingdom	776823
Switzerland	USA	1.62288e+08
Switzerland	USA	470157
Switzerland	Viet Nam	8006.87
Thailand	Australia	28298.4
Thailand	Australia	36016.5
Thailand	Austria	576229
Thailand	Canada	8279.96
Thailand	China	4764.23
Thailand	China	43.5
Thailand	China, Hong Kong SAR	357912
Thailand	China, Hong Kong SAR	101191
Thailand	France	114644
Thailand	France	359.99
Thailand	Germany	353026
Thailand	Germany	25485
Thailand	India	3393.84
Thailand	Indonesia	567192
Thailand	Japan	1.56444e+06
Thailand	Japan	159119
Thailand	Kenya	195.23
Thailand	Lao People's Dem. Rep.	65054.9
Thailand	Lebanon	159.73
Thailand	Malaysia	1143.36
Thailand	Malaysia	66883.8
Thailand	Maldives	55.48
Thailand	Maldives	2747.65
Thailand	Singapore	161723
Thailand	Singapore	7700
Thailand	Spain	212.64
Thailand	Switzerland	139931
Thailand	Switzerland	1399.41
Thailand	Türkiye	21525
Thailand	United Arab Emirates	1538.6
Thailand	United Arab Emirates	1.01331e+06
Thailand	United Kingdom	562597
Thailand	USA	96354.8
Thailand	USA	32403.3
Thailand	Viet Nam	1675.01
Thailand	Viet Nam	2646.84
Türkiye	Albania	178
Türkiye	Algeria	36909
Türkiye	Azerbaijan	224
Türkiye	Azerbaijan	768
Türkiye	Bulgaria	3542
Türkiye	Iran	397
Türkiye	Italy	130405
Türkiye	Libya	2518
Türkiye	Switzerland	7564825
Türkiye	Switzerland	348
Türkiye	USA	97355
Türkiye	Uzbekistan	12913
Uganda	Canada	972383
Uganda	Dem. Rep. of the Congo	377.87
Uganda	Jordan	128654
Uganda	New Zealand	7432
Uganda	United Arab Emirates	129675
Uganda	United Kingdom	17234
Ukraine	Germany	2.12679e+06
Ukraine	Germany	81.56
Ukraine	Poland	67271.5
Ukraine	United Kingdom	7472.87
Ukraine	Uzbekistan	10863.4
United Arab Emirates	Algeria	7474.47
United Arab Emirates	Australia	823.085
United Arab Emirates	Bahrain	1.73173e+07
United Arab Emirates	Bahrain	867.529
United Arab Emirates	Belgium	2.9522e+06
United Arab Emirates	Bulgaria	1.30146e+07
United Arab Emirates	China, Hong Kong SAR	95552.2
United Arab Emirates	China, Hong Kong SAR	99599
United Arab Emirates	Germany	534738
United Arab Emirates	Germany	38752.4
United Arab Emirates	India	1.74395e+07
United Arab Emirates	Iraq	3.51634e+07
United Arab Emirates	Japan	2.22095e+06
United Arab Emirates	Jordan	60.177
United Arab Emirates	Kuwait	13963.8
United Arab Emirates	Kuwait	2098.84
United Arab Emirates	Malaysia	10789.8
United Arab Emirates	Nepal	1.51126e+07
United Arab Emirates	New Zealand	613.405
United Arab Emirates	Oman	9121.85
United Arab Emirates	Oman	40253.8
United Arab Emirates	Saudi Arabia	1281.14
United Arab Emirates	Singapore	68865.3
United Arab Emirates	South Sudan	2722.94
United Arab Emirates	Sri Lanka	4.30908e+06
United Arab Emirates	State of Palestine	802.723
United Arab Emirates	Switzerland	870846
United Arab Emirates	Thailand	30939.2
United Arab Emirates	Thailand	154860
United Arab Emirates	Türkiye	4.82013e+06
United Arab Emirates	United Kingdom	176.335
United Arab Emirates	United Kingdom	3578.49
United Arab Emirates	USA	5.72668e+06
United Arab Emirates	Yemen	16202.3
United Arab Emirates	Yemen	8753.98
United Kingdom	Argentina	7.14422e+07
United Kingdom	Australia	1.32072e+07
United Kingdom	Austria	1.29119e+07
United Kingdom	Austria	27646.4
United Kingdom	Bahrain	23615.1
United Kingdom	Bahrain	4511.85
United Kingdom	Belgium	2.78556e+07
United Kingdom	Belgium	68528
United Kingdom	Brazil	447032
United Kingdom	Bulgaria	3.90484e+06
United Kingdom	Bulgaria	6965.33
United Kingdom	Canada	1.51372e+06
United Kingdom	Cayman Isds	2402.76
United Kingdom	Chile	3.55442e+06
United Kingdom	China	2.80742e+08
United Kingdom	China	24803.1
United Kingdom	China, Hong Kong SAR	1.72337e+09
United Kingdom	China, Hong Kong SAR	909770
United Kingdom	Croatia	623.382
United Kingdom	Croatia	82.762
United Kingdom	Cyprus	361.749
United Kingdom	Czechia	9.50784e+06
United Kingdom	Czechia	26244.8
United Kingdom	Denmark	1.27559e+06
United Kingdom	Denmark	27718.5
United Kingdom	Estonia	25042.1
United Kingdom	Estonia	4111.39
United Kingdom	Eswatini	33318.2
United Kingdom	Finland	2.96038e+06
United Kingdom	Finland	5109.87
United Kingdom	France	1.42832e+07
United Kingdom	France	144796
United Kingdom	Georgia	1.47567e+06
United Kingdom	Germany	1.15076e+09
United Kingdom	Germany	165714
United Kingdom	Ghana	3686.9
United Kingdom	Gibraltar	1301.49
United Kingdom	Greece	2.10633e+06
United Kingdom	Greece	28829.1
United Kingdom	Hungary	37314.8
United Kingdom	India	1.13738e+08
United Kingdom	Iraq	10122.3
United Kingdom	Ireland	1.06496e+08
United Kingdom	Ireland	439468
United Kingdom	Israel	1.43016e+06
United Kingdom	Italy	1.34474e+08
United Kingdom	Italy	133312
United Kingdom	Japan	3.16237e+08
United Kingdom	Japan	83781.5
United Kingdom	Latvia	901.034
United Kingdom	Latvia	269.643
United Kingdom	Lithuania	6.31715e+06
United Kingdom	Luxembourg	33.372
United Kingdom	Malaysia	44637.9
United Kingdom	Malta	384.441
United Kingdom	Mexico	1.14411e+06
United Kingdom	Netherlands	5.82516e+06
United Kingdom	Netherlands	8305.53
United Kingdom	New Zealand	9205.23
United Kingdom	North Macedonia	1.02377e+09
United Kingdom	Norway	5.0621e+06
United Kingdom	Other Asia, nes	3.46942e+07
United Kingdom	Pakistan	707425
United Kingdom	Poland	1.63682e+07
United Kingdom	Poland	8240.13
United Kingdom	Portugal	204080
United Kingdom	Portugal	1146.65
United Kingdom	Qatar	2223.89
United Kingdom	Qatar	88664.4
United Kingdom	Rep. of Korea	4.2367e+07
United Kingdom	Rep. of Korea	11264.9
United Kingdom	Romania	4.48451e+06
United Kingdom	Russian Federation	9.32146e+06
United Kingdom	Saudi Arabia	1.21532e+06
United Kingdom	Singapore	2.69435e+06
United Kingdom	Slovakia	909587
United Kingdom	Slovakia	166.858
United Kingdom	Slovenia	63071.1
United Kingdom	South Africa	3.43892e+07
United Kingdom	Spain	1.04417e+07
United Kingdom	Spain	8774.07
United Kingdom	Sweden	4.74199e+06
United Kingdom	Sweden	348.4
United Kingdom	Switzerland	3.829e+08
United Kingdom	Switzerland	529592
United Kingdom	Thailand	276584
United Kingdom	Thailand	19077.9
United Kingdom	Tunisia	1170.68
United Kingdom	Türkiye	3.37828e+06
United Kingdom	Uganda	88023.7
United Kingdom	Ukraine	640745
United Kingdom	United Arab Emirates	3.63158e+07
United Kingdom	United Arab Emirates	159135
United Kingdom	Uruguay	31141.1
United Kingdom	USA	4.47966e+08
United Kingdom	USA	86699.5
USA	Afghanistan	3375
USA	Antigua and Barbuda	30056
USA	Argentina	2386872
USA	Aruba	6326
USA	Aruba	118971
USA	Australia	9204633
USA	Australia	369587
USA	Austria	145902
USA	Bahamas	34007
USA	Barbados	143181
USA	Belarus	354070
USA	Belgium	17273650
USA	Belgium	28657
USA	Bolivia (Plurinational State of)	7670
USA	Brazil	121638190
USA	Cambodia	17879
USA	Canada	337932164
USA	Canada	3188601
USA	Cayman Isds	332697
USA	Cayman Isds	10379
USA	Chile	42746
USA	China	266202461
USA	China	7188
USA	China, Hong Kong SAR	26410108
USA	China, Hong Kong SAR	5001816
USA	Colombia	485313
USA	Costa Rica	5548545
USA	Costa Rica	32001
USA	Curaçao	7752
USA	Czechia	235158
USA	Denmark	317797
USA	Dominican Rep.	228576
USA	Egypt	6435
USA	Estonia	602492
USA	Finland	18145
USA	France	4810384
USA	France	41000
USA	Germany	689609340
USA	Germany	22958
USA	Grenada	51667
USA	Guatemala	3000
USA	Haiti	6324
USA	Hungary	130440
USA	India	48141900
USA	India	12606
USA	Ireland	10896852
USA	Ireland	2560
USA	Israel	16947970
USA	Italy	552362950
USA	Jamaica	34216
USA	Japan	376267490
USA	Japan	2328885
USA	Jordan	3338
USA	Kuwait	174804
USA	Lao People's Dem. Rep.	614890
USA	Lithuania	11753
USA	Malaysia	51528
USA	Mexico	12497190
USA	Mexico	169977
USA	Netherlands	887265
USA	New Zealand	1344034
USA	New Zealand	2760
USA	Norway	203223
USA	Other Asia, nes	55349797
USA	Peru	264297
USA	Peru	6725
USA	Philippines	122508
USA	Philippines	4187
USA	Poland	173158
USA	Qatar	16174
USA	Rep. of Korea	193344787
USA	Romania	30440
USA	Russian Federation	970536
USA	Saint Lucia	58211
USA	Saudi Arabia	505272
USA	Seychelles	21241
USA	Singapore	29963315
USA	Singapore	8760
USA	Sint Maarten	29567
USA	South Africa	68693701
USA	Spain	75185
USA	Spain	5501
USA	Sweden	27147
USA	Switzerland	425093325
USA	Switzerland	53300
USA	Thailand	4734038
USA	Thailand	583167
USA	Trinidad and Tobago	3158
USA	Türkiye	1462307
USA	Turks and Caicos Isds	17941
USA	United Arab Emirates	186895
USA	United Kingdom	328910422
USA	United Kingdom	994131
USA	Uruguay	249697
USA	Viet Nam	842543
USA	Zimbabwe	10872
Uzbekistan	Russian Federation	583414
Viet Nam	China, Hong Kong SAR	89527.5
Viet Nam	Denmark	1380
Viet Nam	Italy	245546
Viet Nam	Japan	51864.2
Viet Nam	Japan	2.18317e+06
Viet Nam	Malaysia	162898
Viet Nam	Other Asia, nes	32695.2
Viet Nam	Rep. of Korea	7066
Viet Nam	Singapore	99175.8
Viet Nam	Thailand	37363.2
Viet Nam	USA	49215.2
Zimbabwe	Germany	32849
Zimbabwe	South Africa	4.35748e+07

## Sheet: 2019
source	target	weight
Andorra	France	1434.98
Andorra	Spain	962.252
Aruba	USA	506959
Australia	Canada	6906.47
Australia	China	53962.9
Australia	China	29996.4
Australia	China, Hong Kong SAR	49689.7
Australia	China, Hong Kong SAR	700264
Australia	Fiji	18074.3
Australia	France	173.791
Australia	French Polynesia	13144.9
Australia	Germany	325677
Australia	Indonesia	5630.84
Australia	Indonesia	27023.2
Australia	Netherlands	8779.94
Australia	New Zealand	295333
Australia	New Zealand	136371
Australia	Papua New Guinea	12987.1
Australia	Seychelles	11734.4
Australia	Singapore	202509
Australia	Singapore	107968
Australia	South Africa	34301.5
Australia	Switzerland	1.0658e+06
Australia	Switzerland	5644.05
Australia	Thailand	35629.3
Australia	United Arab Emirates	21221.3
Australia	United Kingdom	68915.9
Australia	USA	19039.9
Australia	USA	288883
Australia	Vanuatu	8253
Australia	Viet Nam	104741
Austria	Angola	247.427
Austria	Argentina	49269.4
Austria	Australia	358127
Austria	Belgium	1.20391e+06
Austria	Belgium	830.728
Austria	Bosnia Herzegovina	9014.86
Austria	Brazil	3377.77
Austria	Bulgaria	747426
Austria	Canada	54.859
Austria	Chile	15725.6
Austria	China	577082
Austria	China	213.84
Austria	China, Hong Kong SAR	26238.5
Austria	Croatia	4248.81
Austria	Czechia	1.64959e+06
Austria	Czechia	4655.21
Austria	Denmark	57743.5
Austria	Estonia	3305
Austria	Finland	498.213
Austria	France	806410
Austria	France	10908.1
Austria	Germany	1.5385e+08
Austria	Germany	65328.6
Austria	Greece	66611.6
Austria	Hungary	70227.9
Austria	Hungary	2832.54
Austria	India	65591.7
Austria	Indonesia	2811.26
Austria	Italy	2.2638e+06
Austria	Italy	14588.1
Austria	Japan	5297.85
Austria	Japan	770.271
Austria	Latvia	450.071
Austria	Latvia	753.477
Austria	Luxembourg	799054
Austria	Luxembourg	5498.26
Austria	Malaysia	4351.81
Austria	Malta	87761.6
Austria	Netherlands	1.97718e+06
Austria	North Macedonia	940.447
Austria	Norway	12031
Austria	Other Asia, nes	1455.45
Austria	Poland	197971
Austria	Poland	735.564
Austria	Portugal	57678.5
Austria	Rep. of Korea	152.263
Austria	Romania	76644.2
Austria	Romania	2586.23
Austria	Russian Federation	2375.75
Austria	Singapore	806.098
Austria	Slovakia	633728
Austria	Slovakia	238.471
Austria	Slovenia	1.52903e+06
Austria	Slovenia	220.557
Austria	South Africa	2005.17
Austria	Spain	6203.59
Austria	Spain	25.75
Austria	Sweden	1.11427e+06
Austria	Sweden	884.468
Austria	Switzerland	4.47796e+06
Austria	Switzerland	108791
Austria	Türkiye	660026
Austria	United Kingdom	1.11444e+07
Austria	United Kingdom	532.92
Austria	USA	4.79752e+06
Austria	USA	8266.98
Bahamas	USA	130000
Bahrain	Saudi Arabia	9.92
Barbados	Saint Lucia	1499
Barbados	USA	160
Barbados	USA	116231
Belgium	Argentina	155101
Belgium	Australia	63.407
Belgium	Austria	30.92
Belgium	Azerbaijan	5450.59
Belgium	Brazil	1.87397e+06
Belgium	Bunkers	92140.1
Belgium	Canada	21397.8
Belgium	China	1.74332e+07
Belgium	China, Hong Kong SAR	1.74875e+07
Belgium	Croatia	10.31
Belgium	Czechia	199.031
Belgium	Denmark	425.065
Belgium	France	2.7708e+06
Belgium	France	419.926
Belgium	Germany	1.91584e+09
Belgium	Germany	553.995
Belgium	Greece	37505.1
Belgium	Iran	19.859
Belgium	Ireland	2810.74
Belgium	Israel	45902.6
Belgium	Italy	3.74959e+06
Belgium	Japan	1.80913e+06
Belgium	Japan	15241.4
Belgium	Latvia	902.353
Belgium	Luxembourg	356032
Belgium	Morocco	6114.63
Belgium	Netherlands	332874
Belgium	New Zealand	20.621
Belgium	Norway	7797.37
Belgium	Other Asia, nes	443.189
Belgium	Other Asia, nes	6239.95
Belgium	Poland	928.146
Belgium	Portugal	1999.2
Belgium	Rep. of Korea	6.75361e+06
Belgium	Russian Federation	157.309
Belgium	Saudi Arabia	35980.3
Belgium	Spain	97091.1
Belgium	Sweden	3665.59
Belgium	Switzerland	1.19395e+07
Belgium	Switzerland	1679.21
Belgium	Tunisia	2013.87
Belgium	Uganda	12043.2
Belgium	Ukraine	1153.26
Belgium	Ukraine	30587.1
Belgium	United Kingdom	3.72491e+08
Belgium	USA	3.1433e+08
Belgium	USA	2.138
Belize	Japan	38937.8
Bermuda	China	264.5
Brazil	Argentina	1343
Brazil	Canada	2311
Brazil	Chile	655
Brazil	Chile	658
Brazil	Czechia	51734
Brazil	Guatemala	1180
Brazil	Italy	484434
Brazil	Other Asia, nes	4166
Brazil	Paraguay	61
Brazil	Peru	1618
Brazil	Spain	1072
Brazil	USA	211
Brazil	USA	4933
Bulgaria	Austria	171914
Bulgaria	Germany	266.685
Bulgaria	Türkiye	85424.4
Canada	Australia	1590.23
Canada	Australia	1695.74
Canada	Bahamas	241.172
Canada	Bahrain	2016.8
Canada	Bermuda	676.035
Canada	China, Hong Kong SAR	194253
Canada	Denmark	2685.3
Canada	France	27449.9
Canada	Germany	3.80973e+06
Canada	Germany	26225.9
Canada	Japan	15025.8
Canada	Japan	12719.6
Canada	Mexico	743368
Canada	Netherlands	3074.94
Canada	New Zealand	1658.06
Canada	Switzerland	4.98659e+07
Canada	Trinidad and Tobago	1254.85
Canada	United Kingdom	54694
Canada	United Kingdom	24993
Canada	USA	3.22823e+08
Canada	USA	1.70041e+06
Chile	Rep. of Korea	5.12933e+06
Chile	Spain	1184.02
Chile	Switzerland	494672
China	Angola	4
China	Argentina	14
China	Armenia	4
China	Aruba	8612
China	Australia	222144
China	Austria	98341
China	Azerbaijan	46
China	Bahamas	6494
China	Bahrain	431
China	Bangladesh	420
China	Barbados	9
China	Belarus	15642
China	Belgium	6917
China	Bhutan	43
China	Brazil	5544
China	Brazil	54371
China	Bulgaria	115086
China	Cambodia	9
China	Canada	168953
China	Chile	934
China	China, Hong Kong SAR	56743308
China	China, Hong Kong SAR	9979241
China	China, Macao SAR	51537
China	Colombia	1567
China	Costa Rica	653
China	Croatia	110
China	Cyprus	8365
China	Czechia	64925
China	Denmark	11178
China	Djibouti	39
China	Dominican Rep.	188
China	Ecuador	37
China	Egypt	7372
China	Estonia	5919
China	Fiji	7071
China	Finland	842
China	France	96344
China	France	46045
China	Germany	6850
China	Germany	212266
China	Ghana	5601
China	Greece	2754
China	Honduras	748
China	Hungary	2079
China	India	2474
China	India	51556
China	Indonesia	10595
China	Iraq	870
China	Ireland	3606
China	Israel	58181
China	Italy	28504511
China	Italy	163422
China	Jamaica	262
China	Japan	28666
China	Japan	1129681
China	Kazakhstan	16827
China	Kenya	2384
China	Kuwait	2702
China	Latvia	24406
China	Libya	561
China	Lithuania	5395
China	Luxembourg	627
China	Madagascar	140
China	Malaysia	23
China	Malaysia	35321
China	Malta	1424
China	Mauritius	80
China	Mexico	145299
China	Mongolia	216
China	Montenegro	2470
China	Morocco	9709
China	Myanmar	400
China	Netherlands	37137
China	New Zealand	39212
China	Nigeria	9
China	North Macedonia	61
China	Norway	1778
China	Oman	370
China	Other Asia, nes	248680
China	Other Asia, nes	32754
China	Pakistan	2819
China	Peru	10232
China	Philippines	3771
China	Poland	14456
China	Portugal	8242
China	Qatar	1654
China	Rep. of Korea	3361
China	Rep. of Korea	940788
China	Romania	16860
China	Russian Federation	975
China	Saudi Arabia	1264
China	Serbia	1253
China	Singapore	218836
China	Singapore	508291
China	Slovakia	93
China	Slovenia	21
China	South Africa	36753
China	Spain	893323
China	Sri Lanka	8230
China	Sweden	138905
China	Switzerland	15803
China	Thailand	230775
China	Tunisia	1912
China	Türkiye	26131
China	Ukraine	34
China	United Arab Emirates	23033
China	United Kingdom	3534
China	United Kingdom	485439
China	Uruguay	3011
China	USA	22288
China	USA	3571100
China	Uzbekistan	10
China	Viet Nam	23390
China, Hong Kong SAR	Armenia	1149.71
China, Hong Kong SAR	Australia	366702
China, Hong Kong SAR	Australia	1.08229e+06
China, Hong Kong SAR	Austria	25442.5
China, Hong Kong SAR	Bahrain	10929.7
China, Hong Kong SAR	Bulgaria	76997.9
China, Hong Kong SAR	Canada	88694.5
China, Hong Kong SAR	Chile	99.414
China, Hong Kong SAR	China	7.94011e+08
China, Hong Kong SAR	China	3.20925e+06
China, Hong Kong SAR	China, Macao SAR	188598
China, Hong Kong SAR	Colombia	413.481
China, Hong Kong SAR	Denmark	12886
China, Hong Kong SAR	El Salvador	1810.77
China, Hong Kong SAR	Estonia	3708.05
China, Hong Kong SAR	Fiji	98055
China, Hong Kong SAR	Finland	1288.68
China, Hong Kong SAR	France	865044
China, Hong Kong SAR	Germany	1.27279e+06
China, Hong Kong SAR	Germany	2.41451e+06
China, Hong Kong SAR	Greece	4061.04
China, Hong Kong SAR	Guam	928.29
China, Hong Kong SAR	India	2.95655e+06
China, Hong Kong SAR	India	32731.7
China, Hong Kong SAR	Indonesia	410815
China, Hong Kong SAR	Indonesia	368.687
China, Hong Kong SAR	Israel	6851.27
China, Hong Kong SAR	Italy	47876.6
China, Hong Kong SAR	Italy	160460
China, Hong Kong SAR	Japan	6.29666e+07
China, Hong Kong SAR	Japan	5.13927e+06
China, Hong Kong SAR	Kuwait	45265.9
China, Hong Kong SAR	LAIA, nes	10.082
China, Hong Kong SAR	Lebanon	150.333
China, Hong Kong SAR	Malaysia	518044
China, Hong Kong SAR	Malaysia	74952.4
China, Hong Kong SAR	Malta	12856.4
China, Hong Kong SAR	Mexico	213902
China, Hong Kong SAR	Netherlands	28165.2
China, Hong Kong SAR	New Zealand	58738.9
China, Hong Kong SAR	Norway	7235.02
China, Hong Kong SAR	Oceania, nes	638.726
China, Hong Kong SAR	Other Asia, nes	9.53249e+06
China, Hong Kong SAR	Other Asia, nes	4.10132e+06
China, Hong Kong SAR	Philippines	2932.27
China, Hong Kong SAR	Poland	195079
China, Hong Kong SAR	Qatar	55948
China, Hong Kong SAR	Rep. of Korea	1.82373e+07
China, Hong Kong SAR	Rep. of Korea	23740.9
China, Hong Kong SAR	Russian Federation	48281.5
China, Hong Kong SAR	Saudi Arabia	23655.3
China, Hong Kong SAR	Singapore	302887
China, Hong Kong SAR	Singapore	2.12984e+06
China, Hong Kong SAR	South Africa	25793.5
China, Hong Kong SAR	South Africa	75351.6
China, Hong Kong SAR	Spain	32862.8
China, Hong Kong SAR	Sri Lanka	84119.8
China, Hong Kong SAR	Sweden	133878
China, Hong Kong SAR	Switzerland	1.52288e+07
China, Hong Kong SAR	Switzerland	485839
China, Hong Kong SAR	Thailand	4.49323e+06
China, Hong Kong SAR	Thailand	33818.6
China, Hong Kong SAR	United Arab Emirates	266224
China, Hong Kong SAR	United Arab Emirates	528877
China, Hong Kong SAR	United Kingdom	6.14693e+07
China, Hong Kong SAR	United Kingdom	923009
China, Hong Kong SAR	USA	4.18425e+06
China, Hong Kong SAR	USA	7.47321e+06
China, Hong Kong SAR	Viet Nam	27982.6
China, Hong Kong SAR	Viet Nam	929.055
Colombia	Italy	603788
Colombia	Spain	1175.82
Colombia	USA	3.78221e+06
Costa Rica	Ireland	7220.77
Costa Rica	USA	6.96122e+06
Costa Rica	USA	500
Côte d'Ivoire	South Africa	3.414
Croatia	Bosnia Herzegovina	1250
Croatia	France	2902
Croatia	Germany	18812
Croatia	Germany	491
Croatia	Italy	8857
Croatia	Poland	300
Croatia	Slovenia	853
Croatia	Spain	5
Croatia	United Kingdom	274
Czechia	Argentina	82514
Czechia	Austria	258404
Czechia	Austria	3077
Czechia	Belgium	796943
Czechia	Brazil	533122
Czechia	Colombia	2752
Czechia	Denmark	642
Czechia	Egypt	106650
Czechia	France	537763
Czechia	France	126
Czechia	Germany	28919110
Czechia	Germany	77352
Czechia	Greece	2931
Czechia	India	555607
Czechia	Israel	47161
Czechia	Italy	1368571
Czechia	Italy	19
Czechia	Luxembourg	14088
Czechia	Malta	19
Czechia	Mexico	6570
Czechia	Netherlands	79881
Czechia	Poland	1414615
Czechia	Poland	855
Czechia	Portugal	11873
Czechia	Romania	92821
Czechia	Romania	177
Czechia	Russian Federation	216
Czechia	Serbia	80
Czechia	Slovakia	5993204
Czechia	Slovakia	79934
Czechia	Slovenia	24111
Czechia	South Africa	34043
Czechia	Spain	213639
Czechia	Spain	910
Czechia	Switzerland	512357
Czechia	Thailand	50815
Czechia	Ukraine	154400
Czechia	United Kingdom	138888
Czechia	United Kingdom	17
Czechia	USA	341845
Denmark	Austria	4.498
Denmark	Belgium	39.284
Denmark	China, Hong Kong SAR	12471.5
Denmark	Czechia	87.264
Denmark	Finland	1186.45
Denmark	France	37.634
Denmark	Germany	48190.7
Denmark	Germany	901.274
Denmark	Greenland	3058.72
Denmark	Hungary	40.333
Denmark	Iceland	279.483
Denmark	Latvia	34.336
Denmark	Lithuania	350.704
Denmark	Netherlands	284.881
Denmark	Netherlands	289.079
Denmark	Norway	1266.52
Denmark	Norway	3455.01
Denmark	Poland	80276.5
Denmark	Slovenia	0.9
Denmark	Spain	71.22
Denmark	Sweden	664.973
Denmark	Switzerland	2750
Denmark	Switzerland	4198.25
Denmark	United Kingdom	390.437
Denmark	USA	88970.8
Denmark	USA	6696.96
Dominican Rep.	France	240
Dominican Rep.	USA	3.9335e+07
Dominican Rep.	USA	606.614
Dominican Rep.	Venezuela	49
Ecuador	Colombia	120050
Ecuador	Germany	17893.9
Egypt	Italy	61149
Egypt	Saudi Arabia	119
El Salvador	USA	235.17
Estonia	Austria	1434.27
Estonia	Belgium	45834.4
Estonia	Bulgaria	7986.78
Estonia	Croatia	3125.35
Estonia	Czechia	5904.9
Estonia	Finland	21258
Estonia	Hungary	37342.3
Estonia	Italy	1902.66
Estonia	Latvia	87355.7
Estonia	Lithuania	142051
Estonia	Poland	579.328
Estonia	Slovakia	433.685
Ethiopia	Türkiye	41896.5
Fiji	China, Hong Kong SAR	231.439
Fiji	USA	46259.1
Finland	Estonia	15.675
Finland	Germany	9.84506e+06
Finland	Germany	90.694
Finland	Japan	1.12
Finland	Norway	16261.1
Finland	Russian Federation	1366.01
Finland	Spain	6.718
Finland	Sweden	9.90258e+06
Finland	Sweden	202.662
Finland	United Kingdom	9.2348e+07
Finland	USA	8610.32
Finland	USA	1061.45
France	Algeria	2103.78
France	Andorra	1369.31
France	Australia	503.833
France	Austria	37914
France	Austria	46582.2
France	Bahamas	7480.24
France	Belgium	213457
France	Belgium	376033
France	Brazil	482.56
France	Canada	4637.5
France	China	201869
France	China	69977.9
France	China, Hong Kong SAR	974.077
France	China, Hong Kong SAR	260643
France	Costa Rica	281325
France	Cyprus	2126.18
France	Czechia	41006.4
France	Denmark	10256.9
France	Finland	6022.48
France	French Polynesia	2067.95
France	Gabon	32.469
France	Germany	6.34419e+06
France	Germany	292059
France	Greece	19029.2
France	Guam	988.632
France	Hungary	35688.2
France	India	132603
France	India	10636.5
France	Indonesia	62898.5
France	Ireland	7.837
France	Italy	5.52756e+07
France	Italy	270346
France	Japan	11799.8
France	Japan	2394.89
France	Latvia	13.436
France	Lebanon	5661.96
France	Luxembourg	541800
France	Luxembourg	18275.7
France	Madagascar	1.12
France	Mauritius	13367.2
France	Mexico	43530.1
France	Morocco	205939
France	Netherlands	1.57027e+06
France	Netherlands	27325.7
France	New Caledonia	637.069
France	Poland	25691
France	Poland	20463.5
France	Portugal	48089.2
France	Portugal	85736.7
France	Qatar	12901.5
France	Romania	1924.64
France	Russian Federation	6438.99
France	Saudi Arabia	8749.9
France	Singapore	17002.7
France	Singapore	3151.76
France	Slovakia	35.828
France	Spain	2.11612e+07
France	Spain	140475
France	Sri Lanka	39382.9
France	Sweden	10898.5
France	Switzerland	1.74963e+07
France	Switzerland	1.12043e+06
France	Thailand	452600
France	Thailand	56651
France	Türkiye	11985.6
France	Türkiye	26627
France	United Arab Emirates	3213.34
France	United Arab Emirates	16570.5
France	United Kingdom	1.38206e+06
France	United Kingdom	1.32911e+06
France	USA	9.7331e+06
France	USA	562757
France	Viet Nam	113612
France	Viet Nam	4998.02
French Polynesia	Areas, nes	129709
French Polynesia	Canada	326.478
French Polynesia	China, Hong Kong SAR	247333
French Polynesia	France	183035
French Polynesia	Israel	3148.85
French Polynesia	New Caledonia	206887
French Polynesia	Switzerland	2251.64
French Polynesia	United Kingdom	23801.4
French Polynesia	USA	121185
French Polynesia	Viet Nam	1219.64
French Polynesia	Wallis and Futuna Isds	54112.6
Gabon	France	2015.49
Gabon	France	11.198
Georgia	Spain	3.71
Germany	Albania	19632
Germany	Algeria	744.483
Germany	Andorra	2403.62
Germany	Argentina	1.27388e+07
Germany	Australia	8.55078e+06
Germany	Australia	14430.7
Germany	Austria	6.25326e+07
Germany	Austria	425318
Germany	Azerbaijan	628.052
Germany	Bahamas	1143.03
Germany	Bangladesh	2920.84
Germany	Belarus	724.331
Germany	Belgium	3.6753e+08
Germany	Belgium	64534.9
Germany	Bosnia Herzegovina	213.829
Germany	Brazil	4.30136e+08
Germany	Bulgaria	67994.2
Germany	Bulgaria	1783.4
Germany	Bunkers	32200.8
Germany	Canada	3.42726e+07
Germany	Canada	17912.4
Germany	Chile	1444.18
Germany	China	3.19579e+08
Germany	China	86516.7
Germany	China, Hong Kong SAR	3.51207e+07
Germany	China, Hong Kong SAR	182200
Germany	China, Macao SAR	1143.03
Germany	Costa Rica	731.049
Germany	Croatia	58430.2
Germany	Cyprus	34203.7
Germany	Czechia	7.09679e+06
Germany	Czechia	116492
Germany	Dem. Rep. of the Congo	6960.07
Germany	Denmark	6.38134e+06
Germany	Denmark	2887.25
Germany	Dominican Rep.	3056.3
Germany	Egypt	4807.23
Germany	Estonia	317.945
Germany	Estonia	644.845
Germany	Finland	1.07092e+06
Germany	Finland	3201.84
Germany	France	1.55341e+08
Germany	France	83176.1
Germany	Gibraltar	615.738
Germany	Greece	86716
Germany	Greece	848.599
Germany	Hungary	845364
Germany	Hungary	12764.8
Germany	Iceland	146729
Germany	Iceland	872.109
Germany	India	3.40276e+07
Germany	India	166.809
Germany	Indonesia	12108.8
Germany	Ireland	1.05875e+08
Germany	Ireland	3263.41
Germany	Israel	310476
Germany	Italy	1.50475e+08
Germany	Italy	28667.6
Germany	Japan	1.36249e+08
Germany	Japan	12114.4
Germany	Kuwait	4837.46
Germany	Latvia	383965
Germany	Lithuania	21247.4
Germany	Lithuania	5633.44
Germany	Luxembourg	886590
Germany	Luxembourg	14245.9
Germany	Malaysia	1.19703e+06
Germany	Mali	703.061
Germany	Malta	4962.85
Germany	Mauritius	51388.3
Germany	Mexico	689973
Germany	Morocco	1621.07
Germany	Morocco	7825.47
Germany	Namibia	2630.88
Germany	Netherlands	1.84906e+07
Germany	Netherlands	84946.1
Germany	New Zealand	371592
Germany	New Zealand	830.686
Germany	Norway	7.55546e+06
Germany	Norway	100754
Germany	Other Asia, nes	3.04925e+06
Germany	Other Asia, nes	8905.81
Germany	Peru	631.411
Germany	Poland	1.48008e+07
Germany	Poland	208807
Germany	Portugal	262000
Germany	Portugal	8433.37
Germany	Qatar	1.08293e+06
Germany	Qatar	87833.3
Germany	Rep. of Korea	3.99329e+07
Germany	Rep. of Korea	11413.5
Germany	Romania	2.22139e+06
Germany	Romania	17125.3
Germany	Russian Federation	3.54943e+07
Germany	Russian Federation	53827.8
Germany	Saudi Arabia	467535
Germany	Saudi Arabia	1828.18
Germany	Senegal	473952
Germany	Serbia	2315.17
Germany	Singapore	1.2797e+07
Germany	Singapore	25585.6
Germany	Slovakia	2.34229e+06
Germany	Slovakia	10278.3
Germany	Slovenia	124678
Germany	Slovenia	912.411
Germany	South Africa	6.63176e+07
Germany	South Africa	17414.2
Germany	Spain	1.33008e+07
Germany	Spain	33387.5
Germany	Sri Lanka	12202.8
Germany	Sweden	4.12056e+06
Germany	Sweden	14828.1
Germany	Switzerland	1.53059e+08
Germany	Switzerland	1.60641e+06
Germany	Thailand	1.48385e+07
Germany	Thailand	131601
Germany	Tunisia	11956.5
Germany	Türkiye	838429
Germany	Türkiye	2796.57
Germany	Ukraine	2.56893e+06
Germany	United Arab Emirates	2.36191e+06
Germany	United Arab Emirates	10251.5
Germany	United Kingdom	6.50398e+08
Germany	United Kingdom	117535
Germany	Uruguay	1432.99
Germany	USA	1.17368e+09
Germany	USA	219610
Germany	Viet Nam	312271
Ghana	USA	158.978
Greece	Austria	25193.8
Greece	Belgium	38832.3
Greece	Germany	3636.05
Greece	Germany	668.327
Greece	Portugal	445.551
Greece	Spain	13756.1
Greece	Switzerland	1016.48
Greece	Türkiye	56891.7
Greece	United Kingdom	430.998
Guatemala	Honduras	6
Hungary	Austria	439
Hungary	Belgium	33542
Hungary	Bosnia Herzegovina	8
Hungary	Croatia	483
Hungary	Czechia	374457
Hungary	Germany	1898527
Hungary	Italy	27380
Hungary	Montenegro	4
Hungary	Romania	6
Hungary	Serbia	125
Hungary	Slovakia	44259
Hungary	Slovakia	5631
Hungary	Tunisia	803
India	Bahrain	494.501
India	Canada	495.296
India	China	198.579
India	China, Hong Kong SAR	35963.5
India	China, Hong Kong SAR	119878
India	Dem. Rep. of the Congo	1055.22
India	Egypt	100.383
India	France	1002.55
India	Germany	884670
India	Israel	16946.8
India	Italy	1.92956e+06
India	Japan	745099
India	Japan	24.148
India	Malaysia	414.927
India	Maldives	70.255
India	Nepal	1413.26
India	Other Asia, nes	288.024
India	Qatar	389.629
India	Rep. of Korea	776.233
India	Singapore	561649
India	Singapore	865.267
India	Switzerland	117091
India	Thailand	2154.49
India	United Arab Emirates	131.931
India	United Kingdom	2.31083e+07
India	United Kingdom	878.264
India	USA	19304.2
India	USA	506940
Indonesia	Australia	54461.7
Indonesia	Canada	11222.4
Indonesia	China	18.87
Indonesia	China	51501.1
Indonesia	Germany	1571.7
Indonesia	Singapore	161912
Indonesia	Singapore	4407.71
Indonesia	United Kingdom	7069.9
Indonesia	USA	667.456
Indonesia	USA	719.645
Ireland	Canada	1343.37
Ireland	China	146527
Ireland	Costa Rica	38151.7
Ireland	France	16139.5
Ireland	Germany	6539.97
Ireland	Hungary	526.153
Ireland	India	577.649
Ireland	Italy	86644
Ireland	Japan	339079
Ireland	New Zealand	1637.79
Ireland	Russian Federation	148.89
Ireland	South Africa	4805.91
Ireland	Spain	1061.26
Ireland	Spain	3227.45
Ireland	Switzerland	876.549
Ireland	Thailand	641.459
Ireland	Türkiye	1196.72
Ireland	United Kingdom	39176
Ireland	United Kingdom	2224.4
Ireland	USA	528841
Israel	Australia	1000
Israel	Bunkers	3000
Israel	Canada	2000
Israel	Canada	2000
Israel	Italy	80000
Israel	Romania	8000
Israel	Singapore	1000
Israel	United Kingdom	1176000
Israel	United Kingdom	2000
Israel	USA	12000
Israel	USA	88000
Italy	Australia	249711
Italy	Austria	2.01788e+06
Italy	Austria	3364.16
Italy	Bahrain	1139.67
Italy	Belgium	6.95405e+07
Italy	Belgium	2901.8
Italy	Brazil	121545
Italy	Bulgaria	107258
Italy	Canada	152161
Italy	China	89813.6
Italy	China, Hong Kong SAR	2.08013e+07
Italy	China, Hong Kong SAR	332521
Italy	Colombia	315475
Italy	Croatia	1.24427e+06
Italy	Croatia	12968.5
Italy	Cyprus	308.988
Italy	Cyprus	2536.84
Italy	Czechia	5.49922e+06
Italy	Czechia	8344.91
Italy	Denmark	89866.2
Italy	Denmark	339.215
Italy	Egypt	50668.4
Italy	Estonia	1396.04
Italy	Estonia	1474.41
Italy	Finland	3.79862e+06
Italy	France	8.46594e+07
Italy	France	53592.6
Italy	Germany	8.32495e+08
Italy	Germany	9456.59
Italy	Greece	11579.2
Italy	Greece	8408.72
Italy	Hungary	3.33008e+06
Italy	Hungary	218.307
Italy	Iceland	10551.5
Italy	India	1.1196e+07
Italy	Indonesia	1316.56
Italy	Iran	31234.6
Italy	Ireland	515719
Italy	Ireland	49002.6
Italy	Israel	55446.5
Italy	Japan	589385
Italy	Japan	82882.6
Italy	Jordan	1721.82
Italy	Kazakhstan	3260.05
Italy	Latvia	458896
Italy	Latvia	8133.32
Italy	Lithuania	1490.08
Italy	Luxembourg	2111.42
Italy	Luxembourg	1459.86
Italy	Malta	362337
Italy	Malta	78.366
Italy	Mexico	815769
Italy	Netherlands	4.85991e+07
Italy	Netherlands	1547.18
Italy	New Caledonia	12667.4
Italy	New Zealand	38690.6
Italy	Norway	72742
Italy	Pakistan	1285.21
Italy	Peru	4009.01
Italy	Poland	3.06341e+08
Italy	Poland	142.179
Italy	Portugal	1.10958e+07
Italy	Portugal	2134.93
Italy	Rep. of Korea	36053.1
Italy	Romania	1.09032e+06
Italy	Romania	2418.17
Italy	Russian Federation	23846.9
Italy	Russian Federation	25256.4
Italy	Saudi Arabia	108239
Italy	Singapore	61556.9
Italy	Slovakia	1.0437e+06
Italy	Slovakia	76.127
Italy	Slovenia	1130.72
Italy	Slovenia	461.243
Italy	South Africa	286545
Italy	Spain	8.63369e+07
Italy	Spain	31023
Italy	Sweden	469843
Italy	Sweden	331.378
Italy	Switzerland	4.54317e+08
Italy	Switzerland	1.25113e+06
Italy	Syria	7359.73
Italy	Thailand	3.61562e+06
Italy	Thailand	13146.5
Italy	Türkiye	443301
Italy	United Arab Emirates	305750
Italy	United Kingdom	3.17703e+08
Italy	United Kingdom	71741.1
Italy	Uruguay	2239.04
Italy	USA	2.48062e+08
Italy	USA	35365.7
Italy	Viet Nam	616884
Japan	Australia	197397
Japan	Australia	6824.49
Japan	Austria	1.12094e+07
Japan	Bahrain	3.76257e+06
Japan	Belgium	235353
Japan	Bulgaria	3.38844e+06
Japan	Cambodia	3485.63
Japan	Canada	324035
Japan	Canada	5310.99
Japan	China	9.6649e+07
Japan	China	658985
Japan	China, Hong Kong SAR	2.03486e+08
Japan	China, Hong Kong SAR	1.56619e+07
Japan	China, Macao SAR	4127.72
Japan	Czechia	2.24845e+06
Japan	Fiji	13474.7
Japan	France	2.55552e+06
Japan	France	14080.1
Japan	Germany	3.63043e+07
Japan	Hungary	16373.3
Japan	India	770984
Japan	India	83297.3
Japan	Indonesia	4.18841e+06
Japan	Ireland	3925.92
Japan	Israel	180161
Japan	Italy	88351.4
Japan	Malaysia	8.08735e+07
Japan	Malaysia	4742.29
Japan	Malta	526082
Japan	Mexico	11429.2
Japan	Mongolia	14575.4
Japan	Netherlands	33544.6
Japan	New Zealand	1.74622e+06
Japan	Other Asia, nes	9.99266e+07
Japan	Other Asia, nes	392472
Japan	Philippines	951906
Japan	Portugal	22473.1
Japan	Rep. of Korea	8.50646e+07
Japan	Rep. of Korea	50495.7
Japan	Russian Federation	10053.3
Japan	Singapore	6.88323e+07
Japan	Singapore	293829
Japan	Slovakia	77885.4
Japan	South Africa	318953
Japan	Spain	4054.33
Japan	Switzerland	1.83534e+08
Japan	Switzerland	2036.34
Japan	Thailand	6.85647e+07
Japan	Thailand	19501.2
Japan	Türkiye	1.34222e+06
Japan	United Kingdom	4.26074e+07
Japan	United Kingdom	271723
Japan	USA	1.09393e+08
Japan	USA	377759
Japan	Viet Nam	7.72606e+06
Japan	Viet Nam	35214
Kazakhstan	Kyrgyzstan	74.02
Kenya	Netherlands	6573.43
Kenya	Uganda	66.68
Kenya	United Rep. of Tanzania	187.06
Kenya	USA	12.25
Kuwait	Saudi Arabia	165
Kuwait	Türkiye	144891
Lao People's Dem. Rep.	USA	30608.4
Latvia	Estonia	456.535
Lebanon	Italy	77387.3
Lithuania	Estonia	470
Lithuania	Finland	341
Lithuania	Kazakhstan	2
Lithuania	Latvia	835
Lithuania	Spain	98
Lithuania	Switzerland	302768
Lithuania	Uzbekistan	27
Luxembourg	Belgium	18309.5
Luxembourg	Belgium	7.76
Luxembourg	France	83.142
Luxembourg	France	785.632
Luxembourg	Germany	141109
Luxembourg	Germany	558.803
Luxembourg	Netherlands	137.506
Luxembourg	Rep. of Korea	22.373
Luxembourg	Spain	171.827
Luxembourg	USA	10399.2
Malaysia	Australia	9042.67
Malaysia	Germany	33419.9
Malaysia	Italy	255451
Malaysia	Japan	9.93088e+06
Malaysia	Singapore	492279
Malaysia	Switzerland	200834
Malaysia	USA	39375.5
Mauritius	Austria	2692.82
Mauritius	France	4330.05
Mexico	USA	2596
Netherlands	Areas, nes	2251.1
Netherlands	Austria	747255
Netherlands	Austria	14.552
Netherlands	Belgium	2.23221e+06
Netherlands	Belgium	21597.6
Netherlands	Bulgaria	4.478
Netherlands	Bunkers	7222.34
Netherlands	Canada	3579.83
Netherlands	Canada	479.101
Netherlands	China	198280
Netherlands	Croatia	2.239
Netherlands	Croatia	266.416
Netherlands	Cyprus	13114.8
Netherlands	Cyprus	650.369
Netherlands	Czechia	52.612
Netherlands	Czechia	5.597
Netherlands	Denmark	230.595
Netherlands	Denmark	10.075
Netherlands	Egypt	286.565
Netherlands	Estonia	1060.07
Netherlands	Finland	21148.7
Netherlands	Finland	60.447
Netherlands	France	16413.7
Netherlands	France	15714.1
Netherlands	Germany	1.29129e+07
Netherlands	Germany	60930.9
Netherlands	Greece	2162.67
Netherlands	Greece	972.754
Netherlands	Hungary	505.967
Netherlands	Hungary	50.373
Netherlands	Iceland	12.313
Netherlands	Indonesia	1168.65
Netherlands	Ireland	381.714
Netherlands	Ireland	13.433
Netherlands	Italy	18189.1
Netherlands	Italy	12166.7
Netherlands	Japan	1608.57
Netherlands	Latvia	67.164
Netherlands	Lithuania	1.119
Netherlands	Lithuania	1.119
Netherlands	Luxembourg	1555.96
Netherlands	Malta	73.88
Netherlands	Malta	128.73
Netherlands	Norway	5788.39
Netherlands	Oman	3283.19
Netherlands	Poland	1364.54
Netherlands	Poland	25475.2
Netherlands	Portugal	152.238
Netherlands	Romania	1053.35
Netherlands	Romania	1.119
Netherlands	Saudi Arabia	11446.9
Netherlands	Singapore	5201.83
Netherlands	Slovakia	11.194
Netherlands	Slovenia	32.462
Netherlands	Spain	226.118
Netherlands	Spain	923.501
Netherlands	Sweden	2927.22
Netherlands	Sweden	7924.2
Netherlands	Switzerland	128938
Netherlands	Switzerland	114.178
Netherlands	Thailand	7057.79
Netherlands	Türkiye	17792.8
Netherlands	Ukraine	4891.76
Netherlands	United Arab Emirates	7730.54
Netherlands	United Kingdom	506027
Netherlands	United Kingdom	3211.55
Netherlands	USA	268416
Netherlands	USA	11021.6
New Zealand	Australia	1.46462e+06
New Zealand	Australia	60691
New Zealand	China, Hong Kong SAR	547864
New Zealand	China, Hong Kong SAR	35153
New Zealand	Fiji	8704.64
New Zealand	France	803.505
New Zealand	Japan	6544.81
New Zealand	Norfolk Isds	3590.05
New Zealand	Rep. of Korea	2830.08
New Zealand	Samoa	329.186
New Zealand	Thailand	1.07756e+06
New Zealand	USA	6920.17
North Macedonia	United Kingdom	1264.08
Norway	Australia	1411.14
Norway	Denmark	1277.27
Norway	Germany	425758
Norway	Japan	2.29543e+07
Norway	New Zealand	2138.83
Norway	Rep. of Korea	7.96893e+07
Norway	Romania	2597.41
Norway	Slovenia	982.688
Norway	Sweden	4906.39
Norway	Switzerland	2.07245e+06
Norway	Türkiye	1980.73
Norway	United Kingdom	1.80388e+08
Norway	United Kingdom	3104.11
Norway	USA	9.18013e+07
Oman	Qatar	495899
Other Asia, nes	Areas, nes	22131.5
Other Asia, nes	Australia	14333.7
Other Asia, nes	China	1.90508e+07
Other Asia, nes	China	117064
Other Asia, nes	China, Hong Kong SAR	1.77502e+07
Other Asia, nes	China, Hong Kong SAR	316572
Other Asia, nes	Croatia	9836.24
Other Asia, nes	Germany	1.9114e+06
Other Asia, nes	Germany	23846.4
Other Asia, nes	India	4012.15
Other Asia, nes	Indonesia	20287.2
Other Asia, nes	Iran	725100
Other Asia, nes	Ireland	41998.2
Other Asia, nes	Japan	3.7109e+07
Other Asia, nes	Japan	226.49
Other Asia, nes	Malaysia	2.74963e+07
Other Asia, nes	Philippines	3.45657e+06
Other Asia, nes	Rep. of Korea	192648
Other Asia, nes	Russian Federation	4173.93
Other Asia, nes	Saudi Arabia	3979.79
Other Asia, nes	Singapore	9.58233e+07
Other Asia, nes	Switzerland	1.16071e+07
Other Asia, nes	Thailand	3656.23
Other Asia, nes	United Kingdom	7.70544e+06
Other Asia, nes	USA	2.48434e+07
Other Asia, nes	USA	194.13
Papua New Guinea	Australia	10160.5
Papua New Guinea	Japan	2111.56
Peru	Austria	61.84
Peru	Brazil	680000
Peru	Switzerland	9934.45
Peru	USA	103
Peru	Venezuela	259.6
Philippines	Australia	16461
Philippines	Bolivia (Plurinational State of)	7990
Philippines	Brazil	3300
Philippines	China, Hong Kong SAR	4134073
Philippines	Colombia	5800
Philippines	Dominican Rep.	1178
Philippines	Fiji	9785
Philippines	Japan	120351
Philippines	Japan	677074
Philippines	Peru	11870
Philippines	Singapore	50
Philippines	United Kingdom	1229
Philippines	USA	3266976
Poland	Areas, nes	1947
Poland	Austria	175935
Poland	Austria	3019
Poland	Belgium	64
Poland	Belgium	1890
Poland	Bulgaria	27
Poland	Canada	544
Poland	China, Hong Kong SAR	563
Poland	Croatia	1126
Poland	Czechia	12444108
Poland	Czechia	56816
Poland	Denmark	1317
Poland	Estonia	139
Poland	Finland	709
Poland	France	23
Poland	Germany	24600454
Poland	Germany	56101
Poland	Hungary	4438
Poland	Ireland	4
Poland	Israel	3531
Poland	Italy	7256593
Poland	Italy	20
Poland	Latvia	147
Poland	Lithuania	947
Poland	Luxembourg	97
Poland	Netherlands	7022
Poland	Portugal	16
Poland	Romania	18296
Poland	Russian Federation	136
Poland	Slovakia	760
Poland	Slovenia	120
Poland	Spain	86786
Poland	Spain	58690
Poland	Sweden	210
Poland	Sweden	1729
Poland	Switzerland	25983
Poland	Thailand	2392352
Poland	Türkiye	5095
Poland	Ukraine	26148
Poland	Ukraine	14
Poland	United Kingdom	4694
Poland	USA	95523
Poland	USA	270
Portugal	Albania	303.402
Portugal	Algeria	414.239
Portugal	Angola	860.945
Portugal	Aruba	60.456
Portugal	Bahrain	389.608
Portugal	Brazil	26.87
Portugal	Colombia	1156.51
Portugal	Costa Rica	420.956
Portugal	Dem. Rep. of the Congo	69.413
Portugal	Dominican Rep.	2167.48
Portugal	Ecuador	3713.59
Portugal	Egypt	4364.06
Portugal	Georgia	1335.64
Portugal	Germany	233925
Portugal	Germany	157.859
Portugal	Guatemala	2936.62
Portugal	Honduras	606.804
Portugal	India	396.326
Portugal	Israel	23.511
Portugal	Italy	34661.7
Portugal	Japan	3.359
Portugal	Jordan	1734.2
Portugal	Kazakhstan	376.174
Portugal	Kuwait	2298.47
Portugal	Lebanon	2086.87
Portugal	Mauritania	209.359
Portugal	Mexico	4199.49
Portugal	Montenegro	8.957
Portugal	Morocco	8548.99
Portugal	North Macedonia	345.945
Portugal	Oman	658.304
Portugal	Panama	2661.2
Portugal	Paraguay	139.946
Portugal	Peru	441.108
Portugal	Philippines	3611.71
Portugal	Qatar	1777.87
Portugal	Saudi Arabia	12150.6
Portugal	Senegal	175.772
Portugal	Serbia	19.033
Portugal	Spain	5841.89
Portugal	State of Palestine	116.435
Portugal	Tunisia	3119.11
Portugal	United Arab Emirates	7589.53
Portugal	USA	21916.6
Portugal	USA	125.391
Portugal	Viet Nam	3575.89
Rep. of Korea	Belgium	640
Rep. of Korea	China	3290144
Rep. of Korea	China	469
Rep. of Korea	China, Hong Kong SAR	10667218
Rep. of Korea	China, Hong Kong SAR	2699
Rep. of Korea	Germany	4569035
Rep. of Korea	India	5495
Rep. of Korea	Indonesia	1078988
Rep. of Korea	Israel	538026
Rep. of Korea	Italy	3736576
Rep. of Korea	Japan	29826785
Rep. of Korea	Japan	1567
Rep. of Korea	Malaysia	2015
Rep. of Korea	Other Asia, nes	5550246
Rep. of Korea	Philippines	30
Rep. of Korea	Singapore	4443230
Rep. of Korea	Switzerland	20486726
Rep. of Korea	Thailand	33661
Rep. of Korea	Thailand	245
Rep. of Korea	United Kingdom	43833000
Rep. of Korea	United Kingdom	1120
Rep. of Korea	USA	23920406
Rep. of Korea	USA	27213
Rep. of Korea	Viet Nam	1052217
Rep. of Moldova	Germany	3610
Russian Federation	Areas, nes	911.9
Russian Federation	Armenia	32369
Russian Federation	Armenia	20
Russian Federation	Belarus	17509378
Russian Federation	Belarus	5480
Russian Federation	Canada	584902
Russian Federation	China	2598.99
Russian Federation	China, Hong Kong SAR	3.42857e+08
Russian Federation	Czechia	29702.6
Russian Federation	Estonia	2688.13
Russian Federation	Germany	6.80376e+08
Russian Federation	India	13068.5
Russian Federation	Italy	5.3351e+08
Russian Federation	Japan	8.8287e+08
Russian Federation	Kazakhstan	102084
Russian Federation	Kazakhstan	2697
Russian Federation	Kyrgyzstan	5217
Russian Federation	Latvia	268352
Russian Federation	Other Asia, nes	42.28
Russian Federation	Poland	1.48342e+06
Russian Federation	Rep. of Korea	2.10174e+08
Russian Federation	Rep. of Moldova	7464.36
Russian Federation	Slovakia	14.46
Russian Federation	Spain	15.13
Russian Federation	Switzerland	9.77891e+07
Russian Federation	Ukraine	382434
Russian Federation	United Arab Emirates	2590.34
Russian Federation	United Kingdom	9.36046e+08
Russian Federation	USA	1.42454e+09
Rwanda	Dem. Rep. of the Congo	171.71
Saint Lucia	Grenada	9267.53
Saint Lucia	USA	63522.7
Saudi Arabia	Italy	93333.4
Senegal	Canada	370.499
Senegal	Spain	55.505
Serbia	Austria	31004
Serbia	Germany	97604
Serbia	Switzerland	5226592
Serbia	United Arab Emirates	83242
Singapore	Australia	231742
Singapore	Australia	173133
Singapore	Austria	112577
Singapore	Brunei Darussalam	6711.33
Singapore	China	23801.9
Singapore	China, Hong Kong SAR	6.06254e+06
Singapore	China, Hong Kong SAR	299.063
Singapore	Costa Rica	7322.65
Singapore	Denmark	18917.9
Singapore	France	3217.13
Singapore	Germany	3.23599e+06
Singapore	India	13225.5
Singapore	Indonesia	520264
Singapore	Indonesia	1646.31
Singapore	Italy	5.40361e+06
Singapore	Japan	2.54145e+07
Singapore	Japan	17441.7
Singapore	Malaysia	260389
Singapore	Namibia	840.016
Singapore	Other Asia, nes	838439
Singapore	Spain	8658.17
Singapore	Switzerland	1.55644e+06
Singapore	Thailand	651849
Singapore	Thailand	2405.7
Singapore	United Arab Emirates	2964.98
Singapore	United Kingdom	2.60146e+07
Singapore	USA	1.35978e+08
Singapore	USA	313.723
Slovakia	Austria	335329
Slovakia	Belgium	1.10984e+06
Slovakia	Czechia	180012
Slovakia	Czechia	34.704
Slovakia	Germany	334.723
Slovakia	Hungary	110042
Slovakia	Poland	307.856
Slovakia	Spain	469.06
Slovakia	Ukraine	14338.2
Slovakia	United Kingdom	4.9761e+07
Slovenia	Austria	159855
Slovenia	Bosnia Herzegovina	440.95
Slovenia	Bosnia Herzegovina	6318.51
Slovenia	Bulgaria	1053.48
Slovenia	Croatia	3349.37
Slovenia	Croatia	24925.6
Slovenia	Germany	40424.3
Slovenia	Ireland	6358.48
Slovenia	Italy	592.05
Slovenia	Montenegro	645.05
Slovenia	North Macedonia	24.03
Slovenia	Serbia	6468.4
South Africa	Australia	249205
South Africa	Belgium	252794
South Africa	Botswana	12866.5
South Africa	Botswana	2310.39
South Africa	Canada	248.722
South Africa	China	4.17098e+07
South Africa	China, Hong Kong SAR	7.13636e+08
South Africa	China, Hong Kong SAR	3398.4
South Africa	Dem. People's Rep. of Korea	373754
South Africa	Eswatini	220.149
South Africa	Eswatini	267.61
South Africa	Germany	5.12507e+08
South Africa	India	1.0224e+08
South Africa	Italy	8.08517e+06
South Africa	Japan	2.24885e+09
South Africa	Kenya	2012.82
South Africa	Lesotho	548.712
South Africa	Mauritius	332.23
South Africa	Mozambique	26.844
South Africa	Namibia	11631.4
South Africa	Namibia	4966.08
South Africa	Netherlands	1064.97
South Africa	Nigeria	103.779
South Africa	Other Asia, nes	2.11177e+07
South Africa	Poland	3.99785e+06
South Africa	Rep. of Korea	1.09431e+08
South Africa	Switzerland	3.88883e+08
South Africa	United Kingdom	2.08063e+09
South Africa	United Kingdom	505.471
South Africa	United Rep. of Tanzania	314.241
South Africa	USA	2.04142e+09
South Africa	USA	689.02
South Africa	Zambia	554.938
South Africa	Zimbabwe	5254.93
Spain	Albania	376.569
Spain	Algeria	1487.71
Spain	Andorra	4440.52
Spain	Andorra	3945.71
Spain	Areas, nes	10713
Spain	Argentina	9503.54
Spain	Armenia	809.112
Spain	Aruba	3731.04
Spain	Australia	8955.8
Spain	Australia	25348.1
Spain	Austria	46925
Spain	Azerbaijan	3440.76
Spain	Bahrain	8491.62
Spain	Belarus	133.9
Spain	Belgium	91654.8
Spain	Bosnia Herzegovina	8091.76
Spain	Brazil	42143
Spain	Bulgaria	7812.82
Spain	Canada	55258.3
Spain	Chile	43819.8
Spain	China	113674
Spain	China, Hong Kong SAR	25606.7
Spain	China, Macao SAR	1104.23
Spain	Colombia	56794.8
Spain	Costa Rica	13040.1
Spain	Côte d'Ivoire	140.158
Spain	Croatia	39070.8
Spain	Curaçao	294.556
Spain	Cyprus	27264.8
Spain	Czechia	26301.9
Spain	Denmark	14927.1
Spain	Dominican Rep.	23391
Spain	Ecuador	12439
Spain	Egypt	25373.7
Spain	El Salvador	3547.67
Spain	Estonia	2749.43
Spain	Finland	15533.8
Spain	France	5.82702e+06
Spain	France	403854
Spain	Georgia	2671.2
Spain	Germany	5.88648e+06
Spain	Germany	206483
Spain	Gibraltar	1871.01
Spain	Greece	7327.98
Spain	Greece	166659
Spain	Guatemala	4909.1
Spain	Honduras	16683
Spain	Hungary	11803.7
Spain	Iceland	233.59
Spain	India	62264.6
Spain	India	25806.8
Spain	Indonesia	23487.3
Spain	Ireland	49042
Spain	Israel	57152.7
Spain	Italy	8.33497e+06
Spain	Italy	432538
Spain	Japan	152653
Spain	Jordan	7241.54
Spain	Kazakhstan	4152.69
Spain	Kuwait	72098.4
Spain	Lao People's Dem. Rep.	59.019
Spain	Latvia	3920.4
Spain	Lebanon	35449.7
Spain	Lithuania	5989.19
Spain	Luxembourg	20026.3
Spain	Malaysia	12727.3
Spain	Malta	10506.3
Spain	Mexico	252423
Spain	Mongolia	65.489
Spain	Montenegro	224.88
Spain	Morocco	11157.8
Spain	Netherlands	86590.6
Spain	Netherlands	82093.3
Spain	New Zealand	177.291
Spain	Nicaragua	934.616
Spain	Nigeria	68.109
Spain	North Macedonia	454.91
Spain	Norway	12696.2
Spain	Oman	793.797
Spain	Other Asia, nes	14871.6
Spain	Panama	15793.4
Spain	Paraguay	1166.35
Spain	Peru	8486.38
Spain	Philippines	20531.8
Spain	Poland	1.92668e+06
Spain	Poland	289041
Spain	Portugal	2.09292e+06
Spain	Portugal	271015
Spain	Qatar	37437.3
Spain	Rep. of Korea	51593.6
Spain	Romania	21416.8
Spain	Russian Federation	84084.1
Spain	Saudi Arabia	109147
Spain	Serbia	10305
Spain	Singapore	32310
Spain	Sint Maarten	239.747
Spain	Slovakia	9355.37
Spain	Slovenia	6945.22
Spain	South Africa	7901.71
Spain	Sri Lanka	92.29
Spain	Suriname	59.019
Spain	Sweden	35133.6
Spain	Switzerland	606.185
Spain	Switzerland	72159.9
Spain	Thailand	54165.1
Spain	Tunisia	1984.72
Spain	Türkiye	122864
Spain	Ukraine	4768.31
Spain	United Arab Emirates	96303.2
Spain	United Kingdom	2.8931e+07
Spain	United Kingdom	401555
Spain	Uruguay	2712.76
Spain	USA	319132
Spain	Viet Nam	9625.96
State of Palestine	Israel	2173.59
Sweden	Bulgaria	317.18
Sweden	China	11418.5
Sweden	Denmark	63224.6
Sweden	Denmark	211.453
Sweden	Estonia	845.814
Sweden	Estonia	3700.43
Sweden	Finland	316017
Sweden	Finland	24211.4
Sweden	Germany	492052
Sweden	Germany	9092.5
Sweden	Norway	28651.9
Sweden	Norway	111965
Sweden	Other Asia, nes	3700.43
Sweden	Poland	135859
Sweden	Poland	1691.63
Sweden	Serbia	634.36
Sweden	Slovakia	105.727
Sweden	Spain	2008.81
Sweden	Switzerland	105.727
Sweden	Thailand	845.814
Sweden	Türkiye	1162.99
Sweden	United Kingdom	219383
Sweden	United Kingdom	5709.24
Sweden	USA	422.907
Sweden	USA	845.814
Switzerland	Aruba	6977.13
Switzerland	Australia	6.76681e+06
Switzerland	Austria	2.59186e+07
Switzerland	Austria	1817.23
Switzerland	Belgium	3.0565e+06
Switzerland	Canada	2.43378e+07
Switzerland	China	4.8094e+07
Switzerland	China	38.236
Switzerland	China, Hong Kong SAR	7.52686e+08
Switzerland	China, Hong Kong SAR	1.13482e+07
Switzerland	Colombia	3920.23
Switzerland	Costa Rica	2.0002e+06
Switzerland	Czechia	833566
Switzerland	Denmark	649805
Switzerland	Denmark	373.308
Switzerland	Finland	368409
Switzerland	France	2.97203e+07
Switzerland	France	988.108
Switzerland	Germany	9.72084e+07
Switzerland	Germany	508808
Switzerland	Greece	49011
Switzerland	Hungary	351604
Switzerland	Hungary	17992.2
Switzerland	India	348206
Switzerland	Ireland	83309
Switzerland	Israel	49698.2
Switzerland	Italy	2.2231e+08
Switzerland	Italy	1.25846e+06
Switzerland	Japan	1.86613e+07
Switzerland	Lebanon	319688
Switzerland	Luxembourg	1.33707e+06
Switzerland	Malaysia	4.36823e+06
Switzerland	Mauritius	704.354
Switzerland	Morocco	4909.35
Switzerland	Netherlands	971473
Switzerland	Netherlands	1006.22
Switzerland	New Zealand	109341
Switzerland	Norway	8321.44
Switzerland	Norway	3541.89
Switzerland	Other Asia, nes	202078
Switzerland	Other Asia, nes	1381.54
Switzerland	Pakistan	1623.03
Switzerland	Poland	34528.4
Switzerland	Poland	5555.34
Switzerland	Portugal	137.852
Switzerland	Qatar	150.933
Switzerland	Qatar	2.10224e+06
Switzerland	Rep. of Korea	2.79851e+06
Switzerland	Romania	5685.14
Switzerland	Russian Federation	842490
Switzerland	Saudi Arabia	72274.8
Switzerland	Singapore	6.56595e+06
Switzerland	Slovenia	57517.5
Switzerland	South Africa	436328
Switzerland	Spain	427338
Switzerland	Spain	2282.11
Switzerland	Sweden	373014
Switzerland	Thailand	71450.7
Switzerland	Türkiye	1.06841e+06
Switzerland	Ukraine	168809
Switzerland	United Arab Emirates	3.69471e+06
Switzerland	United Arab Emirates	163511
Switzerland	United Kingdom	4.86379e+08
Switzerland	United Kingdom	34870.5
Switzerland	USA	2.10614e+08
Switzerland	USA	262771
Thailand	Australia	72855
Thailand	Australia	126120
Thailand	Austria	44520.8
Thailand	Canada	1303.1
Thailand	China	30065.4
Thailand	China	1.004
Thailand	China, Hong Kong SAR	1.09435e+06
Thailand	China, Hong Kong SAR	93058.9
Thailand	France	154343
Thailand	Germany	1.73663e+06
Thailand	Germany	95652.4
Thailand	Greece	3953.61
Thailand	India	444843
Thailand	India	10368
Thailand	Indonesia	581123
Thailand	Italy	11432
Thailand	Japan	284898
Thailand	Japan	107994
Thailand	Lao People's Dem. Rep.	487210
Thailand	Luxembourg	1.146
Thailand	New Zealand	21205.7
Thailand	New Zealand	80.027
Thailand	Other Asia, nes	5.625
Thailand	Other Asia, nes	149.998
Thailand	Spain	5155.82
Thailand	Switzerland	723091
Thailand	United Arab Emirates	2.79854e+06
Thailand	United Kingdom	42987.1
Thailand	United Kingdom	238.763
Thailand	USA	111093
Thailand	USA	107620
Thailand	Viet Nam	13918
Trinidad and Tobago	Grenada	99.937
Trinidad and Tobago	USA	3.72743e+06
Türkiye	Azerbaijan	141
Türkiye	Bosnia Herzegovina	316
Türkiye	Bulgaria	240
Türkiye	Croatia	126
Türkiye	Czechia	680
Türkiye	Egypt	129
Türkiye	Germany	139037
Türkiye	Greece	162
Türkiye	Iraq	124
Türkiye	Italy	3765
Türkiye	Kazakhstan	115
Türkiye	Kuwait	13584
Türkiye	Libya	3079
Türkiye	Lithuania	5647
Türkiye	Nigeria	1855
Türkiye	Portugal	893
Türkiye	Romania	3285
Türkiye	Russian Federation	106
Türkiye	Saudi Arabia	268
Türkiye	Spain	623
Türkiye	Spain	5636
Türkiye	Switzerland	14396793
Türkiye	United Arab Emirates	138
Türkiye	United Kingdom	1460524
Türkiye	USA	102031
Uganda	Kenya	66
Ukraine	Areas, nes	100.23
Ukraine	Germany	2.93271e+06
Ukraine	Germany	205.11
Ukraine	Poland	66700.2
Ukraine	Switzerland	1.15169e+07
Ukraine	USA	302.79
Ukraine	Uzbekistan	63091.7
United Arab Emirates	Armenia	849.718
United Arab Emirates	Azerbaijan	653.628
United Arab Emirates	Bahrain	208.305
United Arab Emirates	Belgium	4.39741e+06
United Arab Emirates	China, Hong Kong SAR	15225.5
United Arab Emirates	France	5397.85
United Arab Emirates	Germany	5.58318e+06
United Arab Emirates	India	690423
United Arab Emirates	Iraq	3.22062e+06
United Arab Emirates	Italy	36576.1
United Arab Emirates	Kuwait	44784.1
United Arab Emirates	Libya	3833.9
United Arab Emirates	Malaysia	6915.9
United Arab Emirates	Netherlands	48267.9
United Arab Emirates	New Zealand	452.008
United Arab Emirates	Oman	21711.9
United Arab Emirates	Oman	71910.6
United Arab Emirates	Pakistan	6807.35
United Arab Emirates	Saudi Arabia	12812.5
United Arab Emirates	Singapore	66987.4
United Arab Emirates	Switzerland	98986.3
United Arab Emirates	Switzerland	1.04229e+06
United Arab Emirates	Ukraine	5427.78
United Arab Emirates	United Kingdom	128.49
United Arab Emirates	Yemen	3396.87
United Kingdom	Argentina	1.08619e+08
United Kingdom	Australia	2.51237e+07
United Kingdom	Australia	3443.22
United Kingdom	Austria	1.19325e+07
United Kingdom	Austria	16449.8
United Kingdom	Bahrain	56745.4
United Kingdom	Bahrain	34862.6
United Kingdom	Bangladesh	2143.07
United Kingdom	Belgium	1.9033e+07
United Kingdom	Belgium	7761.29
United Kingdom	Brazil	902618
United Kingdom	Bulgaria	1.88754e+06
United Kingdom	Bulgaria	13240.3
United Kingdom	Canada	2.77714e+06
United Kingdom	Canada	21176.5
United Kingdom	Chile	3.64478e+06
United Kingdom	China	4.61956e+08
United Kingdom	China	620762
United Kingdom	China, Hong Kong SAR	1.76864e+09
United Kingdom	China, Hong Kong SAR	490767
United Kingdom	Colombia	103851
United Kingdom	Croatia	781.62
United Kingdom	Cyprus	5813.62
United Kingdom	Cyprus	25190.7
United Kingdom	Czechia	4.29914e+06
United Kingdom	Czechia	318.012
United Kingdom	Denmark	1.56518e+06
United Kingdom	Denmark	2867.22
United Kingdom	Egypt	146398
United Kingdom	Estonia	445.728
United Kingdom	Estonia	10942.7
United Kingdom	Ethiopia	5799.57
United Kingdom	Finland	4.10217e+06
United Kingdom	Finland	6611.84
United Kingdom	France	9.13705e+06
United Kingdom	France	71559.1
United Kingdom	Georgia	2.29846e+06
United Kingdom	Germany	1.22986e+09
United Kingdom	Germany	145014
United Kingdom	Ghana	1841.66
United Kingdom	Gibraltar	1917.01
United Kingdom	Greece	5.54829e+06
United Kingdom	Greece	1416.37
United Kingdom	Hungary	8599.1
United Kingdom	Hungary	2411.27
United Kingdom	Iceland	1521.1
United Kingdom	India	1.33694e+08
United Kingdom	Ireland	1.16928e+08
United Kingdom	Ireland	370202
United Kingdom	Israel	2.21534e+06
United Kingdom	Italy	1.51607e+08
United Kingdom	Italy	93660.3
United Kingdom	Japan	3.83362e+08
United Kingdom	Japan	183533
United Kingdom	Kenya	24393.7
United Kingdom	Latvia	1845.49
United Kingdom	Latvia	8421.58
United Kingdom	Lithuania	7.48835e+06
United Kingdom	Lithuania	356.327
United Kingdom	Luxembourg	417.63
United Kingdom	Malaysia	101549
United Kingdom	Malta	204.345
United Kingdom	Malta	1021.73
United Kingdom	Mexico	1.98394e+06
United Kingdom	Netherlands	4.77834e+06
United Kingdom	Netherlands	38050.4
United Kingdom	New Zealand	1586.23
United Kingdom	Nigeria	2235.03
United Kingdom	North Macedonia	1.39182e+09
United Kingdom	Norway	4.69277e+06
United Kingdom	Other Asia, nes	1.18972e+07
United Kingdom	Other Asia, nes	1443.19
United Kingdom	Pakistan	5877.48
United Kingdom	Poland	9.71347e+06
United Kingdom	Poland	9720.45
United Kingdom	Portugal	1.58409e+06
United Kingdom	Portugal	740.751
United Kingdom	Qatar	13002.7
United Kingdom	Qatar	3868.51
United Kingdom	Rep. of Korea	8.79708e+07
United Kingdom	Rep. of Korea	8046.09
United Kingdom	Romania	8.57464e+06
United Kingdom	Romania	21005.4
United Kingdom	Russian Federation	3.93117e+06
United Kingdom	Saudi Arabia	3.67947e+06
United Kingdom	Singapore	3.41416e+07
United Kingdom	Slovakia	2272.06
United Kingdom	Slovakia	185.188
United Kingdom	Slovenia	388974
United Kingdom	Slovenia	100.895
United Kingdom	South Africa	7.72405e+06
United Kingdom	Spain	1.13901e+07
United Kingdom	Spain	49234.4
United Kingdom	Sweden	5.45061e+06
United Kingdom	Sweden	1457.24
United Kingdom	Switzerland	1.871e+08
United Kingdom	Switzerland	80910.5
United Kingdom	Thailand	118054
United Kingdom	Tunisia	1144.33
United Kingdom	Türkiye	4.52741e+06
United Kingdom	Türkiye	1673.08
United Kingdom	Uganda	25991.4
United Kingdom	Ukraine	258670
United Kingdom	United Arab Emirates	2.69036e+06
United Kingdom	United Arab Emirates	407291
United Kingdom	USA	6.15664e+08
United Kingdom	USA	79275.7
United Kingdom	Zambia	1441.91
USA	Antigua and Barbuda	9463
USA	Argentina	1559310
USA	Armenia	8601
USA	Aruba	5422
USA	Aruba	6106
USA	Australia	11621428
USA	Australia	297281
USA	Austria	666869
USA	Bahamas	8493
USA	Bahamas	39312
USA	Barbados	2762
USA	Barbados	56708
USA	Belarus	614670
USA	Belgium	24417233
USA	Bermuda	15407
USA	Bolivia (Plurinational State of)	4250
USA	Br. Virgin Isds	9434
USA	Brazil	165624517
USA	Brazil	20020
USA	Bulgaria	3350
USA	Cambodia	13803
USA	Canada	615024550
USA	Canada	2335897
USA	Cayman Isds	258576
USA	Chile	15065
USA	China	642627874
USA	China, Hong Kong SAR	54101336
USA	China, Hong Kong SAR	4584908
USA	China, Macao SAR	90745
USA	Colombia	353441
USA	Costa Rica	10175134
USA	Czechia	237672
USA	Czechia	9548
USA	Denmark	353885
USA	Dominican Rep.	203581
USA	El Salvador	15113
USA	Estonia	640624
USA	Finland	105842
USA	France	7380016
USA	France	40365
USA	Germany	584306943
USA	Germany	36580
USA	Grenada	5239
USA	Guatemala	3058
USA	Haiti	5929
USA	Hungary	102209
USA	Iceland	13561
USA	India	32459167
USA	India	10090
USA	Ireland	11883346
USA	Israel	10177166
USA	Israel	14523
USA	Italy	537598882
USA	Japan	357263099
USA	Japan	1244115
USA	Kazakhstan	5000
USA	Kuwait	219429
USA	Lao People's Dem. Rep.	316257
USA	Lebanon	3618
USA	Lebanon	5427
USA	Malaysia	33314
USA	Mexico	13909454
USA	Mexico	35281
USA	Netherlands	1005477
USA	New Zealand	905287
USA	New Zealand	3109
USA	Norway	4025141
USA	Norway	3011
USA	Other Asia, nes	41460976
USA	Peru	41438
USA	Peru	4162
USA	Philippines	67990
USA	Poland	150380
USA	Portugal	2595
USA	Rep. of Korea	275170086
USA	Romania	15313
USA	Russian Federation	16113
USA	Saint Lucia	20718
USA	Saudi Arabia	2074120
USA	Seychelles	42349
USA	Singapore	6590243
USA	Singapore	27310
USA	Sint Maarten	2356376
USA	South Africa	60438915
USA	Spain	45006
USA	Sweden	26933
USA	Switzerland	703650960
USA	Switzerland	5690
USA	Thailand	5801286
USA	Thailand	390563
USA	Trinidad and Tobago	3237
USA	Türkiye	74383
USA	Ukraine	22027
USA	United Arab Emirates	74766
USA	United Arab Emirates	12480
USA	United Kingdom	538460387
USA	United Kingdom	293168
USA	Uruguay	329897
USA	Viet Nam	823723
Uzbekistan	Russian Federation	523238
Uzbekistan	Switzerland	19611502
Viet Nam	Italy	160557
Viet Nam	Japan	100849
Viet Nam	Japan	1.37696e+06
Viet Nam	Malaysia	40903.8
Viet Nam	Rep. of Korea	34376.5
Viet Nam	Singapore	48690.6
Viet Nam	Thailand	167025
Viet Nam	USA	34197.7
Zimbabwe	South Africa	6.01268e+07

## Sheet: 2020
source	target	weight
Andorra	France	3921.25
Andorra	Germany	1115.86
Andorra	Spain	16286.1
Andorra	Spain	653.553
Australia	Bunkers	2.42465e+06
Australia	Canada	16215.8
Australia	China	57309.8
Australia	China, Hong Kong SAR	759408
Australia	China, Hong Kong SAR	709306
Australia	China, Macao SAR	2752.76
Australia	Cyprus	29453.9
Australia	Germany	866028
Australia	Germany	24086.7
Australia	Indonesia	1548.43
Australia	Israel	11578.8
Australia	Italy	670.986
Australia	New Zealand	520988
Australia	New Zealand	96728.7
Australia	Singapore	1.4882e+06
Australia	Singapore	13040.5
Australia	South Africa	512.702
Australia	Switzerland	973531
Australia	Thailand	185.812
Australia	Thailand	7852.95
Australia	Türkiye	14518.1
Australia	United Arab Emirates	1676.43
Australia	United Kingdom	456546
Australia	United Kingdom	6561.9
Australia	USA	504773
Australia	USA	140041
Australia	Viet Nam	56286.4
Austria	Argentina	21727
Austria	Australia	298848
Austria	Belgium	1.4272e+06
Austria	Belgium	3511.47
Austria	Bosnia Herzegovina	10941.2
Austria	Brazil	18316.1
Austria	Bulgaria	490224
Austria	Bulgaria	331.379
Austria	Canada	1815.73
Austria	Chile	27009.7
Austria	China	350471
Austria	China	742.746
Austria	Croatia	8988.37
Austria	Croatia	1391.79
Austria	Czechia	2.25784e+06
Austria	Czechia	3582.32
Austria	Denmark	41758.3
Austria	Estonia	9373.45
Austria	Finland	27199.4
Austria	France	1.16927e+06
Austria	France	3128.67
Austria	Germany	1.85112e+08
Austria	Germany	93394
Austria	Greece	47888.8
Austria	Hungary	56564.1
Austria	Hungary	8397.6
Austria	India	3878.28
Austria	Israel	2773.3
Austria	Italy	4.36966e+06
Austria	Italy	17231.7
Austria	Japan	83172.7
Austria	Japan	3032.69
Austria	Latvia	245.677
Austria	Lithuania	699.324
Austria	Luxembourg	749637
Austria	Luxembourg	75.417
Austria	Malaysia	13976.2
Austria	Malta	103776
Austria	Netherlands	1.50731e+06
Austria	Poland	202070
Austria	Poland	4277.07
Austria	Portugal	67885.8
Austria	Rep. of Korea	3869.14
Austria	Romania	31158.8
Austria	Romania	3298.93
Austria	Serbia	2033.98
Austria	Singapore	6179.65
Austria	Slovakia	295110
Austria	Slovenia	1.30331e+06
Austria	Slovenia	165.689
Austria	Spain	28207.2
Austria	Spain	62.848
Austria	Sweden	1.50654e+06
Austria	Sweden	478.785
Austria	Switzerland	1.28913e+06
Austria	Switzerland	686.754
Austria	Türkiye	1.249e+06
Austria	United Kingdom	1.19948e+07
Austria	United Kingdom	16940.3
Austria	USA	1.18823e+07
Austria	USA	4349.06
Bahrain	Hungary	117.7
Bahrain	Italy	4500.96
Bahrain	Jordan	1008
Bahrain	Switzerland	5320.14
Bahrain	United Arab Emirates	1.03737e+06
Bahrain	United Arab Emirates	3269.7
Barbados	USA	2625.5
Belgium	Areas, nes	9634.47
Belgium	Argentina	159648
Belgium	Australia	1948.85
Belgium	Austria	9307.37
Belgium	Azerbaijan	3820.49
Belgium	Brazil	8.42975e+06
Belgium	Bulgaria	3844.59
Belgium	Bunkers	43951.6
Belgium	Canada	1347.79
Belgium	China	8.42048e+07
Belgium	China, Hong Kong SAR	4.77015e+06
Belgium	Côte d'Ivoire	2743.24
Belgium	Estonia	95.328
Belgium	France	4.75147e+06
Belgium	France	384.463
Belgium	Germany	2.08023e+09
Belgium	Greece	10243.9
Belgium	India	1497.42
Belgium	Ireland	25401.8
Belgium	Israel	9615
Belgium	Italy	1.76447e+07
Belgium	Japan	2.36738e+07
Belgium	Kenya	2379.59
Belgium	Latvia	2075.16
Belgium	Luxembourg	4663.31
Belgium	Morocco	10112.5
Belgium	Netherlands	13245.6
Belgium	Other Asia, nes	434.034
Belgium	Poland	1091.07
Belgium	Poland	1403.38
Belgium	Rep. of Korea	9.77394e+07
Belgium	Saudi Arabia	99715.2
Belgium	Slovenia	6524.09
Belgium	South Africa	285.492
Belgium	Spain	55066.2
Belgium	Switzerland	1.2589e+07
Belgium	Thailand	311.831
Belgium	Türkiye	16507.1
Belgium	United Kingdom	9.94193e+08
Belgium	USA	6.28898e+08
Belize	Japan	47713.9
Bolivia (Plurinational State of)	Spain	243.54
Brazil	Belgium	654867
Brazil	Canada	133
Brazil	Czechia	284233
Brazil	Germany	2982989
Brazil	Guatemala	1345
Brazil	Italy	4235187
Brazil	Peru	3000
Brazil	Portugal	1479
Brazil	USA	333667
Brazil	USA	1985
Bulgaria	Austria	97112.3
Canada	Australia	5125.44
Canada	Bahamas	49.957
Canada	Barbados	74.563
Canada	Belgium	23743.8
Canada	China	5861.38
Canada	China	163.292
Canada	China, Hong Kong SAR	18743.6
Canada	Colombia	13729.2
Canada	France	32471.3
Canada	Germany	553872
Canada	Germany	11065.1
Canada	Japan	21957.2
Canada	Luxembourg	29.825
Canada	Mexico	958731
Canada	Poland	1360.02
Canada	Switzerland	7.35365e+07
Canada	Trinidad and Tobago	1502.44
Canada	United Kingdom	124143
Canada	United Kingdom	34980.4
Canada	USA	3.9356e+08
Canada	USA	1.74936e+06
Chile	Rep. of Korea	1.91469e+06
Chile	Switzerland	2.59712e+06
China	Algeria	1047
China	Argentina	168
China	Aruba	7420
China	Australia	399169
China	Austria	86472
China	Bahamas	4077
China	Belarus	260
China	Belgium	3508
China	Belgium	51383
China	Bolivia (Plurinational State of)	72
China	Brazil	12250
China	Brazil	23274
China	Bulgaria	1012
China	Cambodia	26
China	Canada	5411
China	Canada	199477
China	Chile	510
China	China, Hong Kong SAR	107286067
China	China, Hong Kong SAR	4152259
China	China, Macao SAR	346
China	Costa Rica	2175
China	Croatia	57
China	Cyprus	3704
China	Czechia	18404
China	Denmark	18308
China	Dominican Rep.	773
China	Ecuador	6555
China	Estonia	7674
China	Fiji	2898
China	Finland	12941
China	France	110307
China	France	51997
China	Germany	184733
China	Germany	704305
China	Greece	2289
China	Guatemala	2700
China	Honduras	7037
China	India	60033
China	Indonesia	7
China	Israel	41936
China	Italy	171120536
China	Italy	106335
China	Japan	1167496
China	Japan	438670
China	Latvia	9284
China	Libya	67
China	Lithuania	15226
China	Luxembourg	6
China	Malaysia	138802
China	Maldives	6240
China	Malta	43
China	Mauritius	26
China	Mexico	115732
China	Montenegro	3222
China	Morocco	58
China	Netherlands	34781
China	New Zealand	19046
China	Nicaragua	1855
China	Norway	4115
China	Other Asia, nes	290936
China	Other Asia, nes	15410
China	Panama	6131
China	Peru	14
China	Philippines	4096
China	Poland	15237
China	Portugal	30724
China	Rep. of Korea	708573
China	Romania	7553
China	Russian Federation	42369
China	Saint Kitts and Nevis	42
China	Saudi Arabia	11703
China	Singapore	1626607
China	Singapore	94659
China	Slovakia	7
China	South Africa	2315
China	Spain	1435
China	Spain	288858
China	Sri Lanka	3355
China	Sweden	127254
China	Switzerland	9500
China	Syria	87
China	Thailand	294107
China	Türkiye	26723
China	Ukraine	116
China	United Arab Emirates	1903
China	United Kingdom	310063
China	Uruguay	9215
China	USA	79970
China	USA	2549305
China	Uzbekistan	740
China	Vanuatu	42
China	Viet Nam	1298
China	Viet Nam	209
China	Yemen	59
China, Hong Kong SAR	Australia	1.60348e+06
China, Hong Kong SAR	Australia	1.3839e+06
China, Hong Kong SAR	Austria	43566.6
China, Hong Kong SAR	Bahrain	5099.76
China, Hong Kong SAR	Belarus	260598
China, Hong Kong SAR	Bulgaria	100377
China, Hong Kong SAR	Cambodia	450.934
China, Hong Kong SAR	Canada	3.07031e+06
China, Hong Kong SAR	Canada	301213
China, Hong Kong SAR	Chile	9618.64
China, Hong Kong SAR	China	1.91902e+09
China, Hong Kong SAR	China	3.96018e+06
China, Hong Kong SAR	China, Macao SAR	392172
China, Hong Kong SAR	Cyprus	7532.59
China, Hong Kong SAR	Czechia	23120.5
China, Hong Kong SAR	Denmark	11102.7
China, Hong Kong SAR	El Salvador	3111.03
China, Hong Kong SAR	Fiji	36419.7
China, Hong Kong SAR	France	456698
China, Hong Kong SAR	Germany	875870
China, Hong Kong SAR	Germany	1.49086e+06
China, Hong Kong SAR	Gibraltar	8685.19
China, Hong Kong SAR	Greece	22945.8
China, Hong Kong SAR	India	4.66017e+06
China, Hong Kong SAR	India	46584.4
China, Hong Kong SAR	Indonesia	278065
China, Hong Kong SAR	Indonesia	2690.26
China, Hong Kong SAR	Ireland	3663.68
China, Hong Kong SAR	Israel	4921.99
China, Hong Kong SAR	Italy	1.0103e+08
China, Hong Kong SAR	Italy	153521
China, Hong Kong SAR	Japan	4.23622e+08
China, Hong Kong SAR	Japan	2.50045e+06
China, Hong Kong SAR	Jordan	2015.02
China, Hong Kong SAR	Kuwait	12782.3
China, Hong Kong SAR	Lebanon	564.635
China, Hong Kong SAR	Malaysia	238446
China, Hong Kong SAR	Malaysia	106063
China, Hong Kong SAR	Mexico	87009.3
China, Hong Kong SAR	Netherlands	16139.3
China, Hong Kong SAR	New Zealand	67776
China, Hong Kong SAR	Norway	96090.1
China, Hong Kong SAR	Oman	339.683
China, Hong Kong SAR	Other Asia, nes	2.02098e+07
China, Hong Kong SAR	Other Asia, nes	1.10137e+06
China, Hong Kong SAR	Paraguay	238.229
China, Hong Kong SAR	Poland	114494
China, Hong Kong SAR	Qatar	17951.6
China, Hong Kong SAR	Rep. of Korea	6.38494e+06
China, Hong Kong SAR	Rep. of Korea	18925.1
China, Hong Kong SAR	Romania	11367.7
China, Hong Kong SAR	Russian Federation	47841
China, Hong Kong SAR	Saudi Arabia	42074.9
China, Hong Kong SAR	Singapore	4.45242e+06
China, Hong Kong SAR	Singapore	538531
China, Hong Kong SAR	South Africa	21834
China, Hong Kong SAR	Spain	21927.8
China, Hong Kong SAR	Sri Lanka	97631.4
China, Hong Kong SAR	Sweden	87985.7
China, Hong Kong SAR	Switzerland	4.45286e+07
China, Hong Kong SAR	Switzerland	147004
China, Hong Kong SAR	Thailand	3.98669e+06
China, Hong Kong SAR	Thailand	7081.01
China, Hong Kong SAR	Türkiye	2815.44
China, Hong Kong SAR	United Arab Emirates	555315
China, Hong Kong SAR	United Kingdom	2.39544e+07
China, Hong Kong SAR	United Kingdom	494201
China, Hong Kong SAR	USA	3.08965e+07
China, Hong Kong SAR	USA	6.47235e+06
China, Hong Kong SAR	Viet Nam	8.31854e+06
China, Hong Kong SAR	Viet Nam	2780.12
Colombia	Free Zones	1.63107e+06
Colombia	Italy	2.90119e+06
Colombia	Switzerland	764174
Colombia	USA	8.84033e+06
Congo	Cameroon	202.1
Costa Rica	USA	3.0827e+07
Côte d'Ivoire	France	6465.7
Côte d'Ivoire	United Kingdom	8.69
Croatia	Estonia	1221
Croatia	France	3341
Croatia	Germany	19468
Croatia	Germany	182
Croatia	Slovakia	2985
Croatia	Spain	56
Cyprus	United Kingdom	103.94
Czechia	Argentina	97712
Czechia	Australia	25141
Czechia	Austria	543901
Czechia	Austria	2427
Czechia	Belgium	806312
Czechia	Brazil	612406
Czechia	Colombia	5582
Czechia	Denmark	22749
Czechia	Egypt	45947
Czechia	France	516659
Czechia	Germany	20966823
Czechia	Germany	43520
Czechia	Greece	3631
Czechia	Hungary	156
Czechia	India	1054738
Czechia	Indonesia	49764
Czechia	Israel	70711
Czechia	Italy	928657
Czechia	Italy	10
Czechia	Luxembourg	44256
Czechia	Netherlands	168578
Czechia	Netherlands	961
Czechia	Other Asia, nes	3308
Czechia	Peru	5718
Czechia	Poland	1177901
Czechia	Poland	8266
Czechia	Portugal	10696
Czechia	Rep. of Korea	2443
Czechia	Romania	98295
Czechia	Romania	256
Czechia	Russian Federation	14829
Czechia	Serbia	39
Czechia	Slovakia	3428206
Czechia	Slovakia	82459
Czechia	Slovenia	24857
Czechia	South Africa	45912
Czechia	Spain	303914
Czechia	Spain	445
Czechia	Switzerland	188877
Czechia	Thailand	51435
Czechia	Ukraine	276937
Czechia	United Kingdom	192575
Czechia	United Kingdom	122
Czechia	USA	954896
Denmark	Austria	501.364
Denmark	Austria	27.972
Denmark	Belgium	2.2862e+06
Denmark	Belgium	168.752
Denmark	China	1465.27
Denmark	China, Hong Kong SAR	418.058
Denmark	China, Hong Kong SAR	8443.86
Denmark	Czechia	208.8
Denmark	Finland	3324.29
Denmark	France	1988.03
Denmark	Germany	246791
Denmark	Germany	4827.16
Denmark	Greenland	12905.2
Denmark	Hungary	21.553
Denmark	Iceland	41.577
Denmark	Italy	191.221
Denmark	Italy	17706.1
Denmark	Kazakhstan	119.074
Denmark	Lithuania	3585.52
Denmark	Luxembourg	30.571
Denmark	Malaysia	253.586
Denmark	Mauritius	11.77
Denmark	Netherlands	1341
Denmark	Netherlands	3695.11
Denmark	Norway	4016.11
Denmark	Norway	5821.48
Denmark	Other Asia, nes	58.543
Denmark	Poland	275131
Denmark	Poland	327.109
Denmark	Rep. of Korea	1465.42
Denmark	Romania	133.289
Denmark	Romania	113.571
Denmark	Slovenia	36.532
Denmark	Spain	901.232
Denmark	Spain	567.703
Denmark	Sweden	1083.28
Denmark	Sweden	1916.34
Denmark	Switzerland	1471.69
Denmark	Thailand	88064.1
Denmark	United Kingdom	5377.89
Denmark	USA	124587
Denmark	USA	14121.5
Dominican Rep.	USA	2.35113e+07
Egypt	Italy	491407
Egypt	United Arab Emirates	5.31
Estonia	Belgium	611.78
Estonia	Bulgaria	15551.8
Estonia	Croatia	1150.98
Estonia	Czechia	8951.21
Estonia	Finland	13234.6
Estonia	Finland	17487.7
Estonia	Germany	818.02
Estonia	Hungary	136133
Estonia	Latvia	86118.3
Estonia	Lithuania	125951
Estonia	Netherlands	2683.34
Estonia	Russian Federation	1040.88
Estonia	Slovakia	480.14
Ethiopia	Türkiye	61031.2
Fiji	USA	5201.48
Finland	Estonia	139165
Finland	Germany	2.3318e+07
Finland	Germany	132.495
Finland	Norway	55264
Finland	Russian Federation	2227.28
Finland	Singapore	351.796
Finland	Spain	15.991
Finland	Sweden	249990
Finland	Sweden	175.898
Finland	United Arab Emirates	228.439
Finland	United Kingdom	6.14536e+07
Finland	USA	3280.39
Finland	USA	748.138
France	Areas, nes	62.821
France	Areas, nes	35.408
France	Australia	513.988
France	Austria	41042.5
France	Belgium	132424
France	Belgium	42224.7
France	Brazil	13030.2
France	Brazil	2521.97
France	Bulgaria	90.233
France	Canada	2946.87
France	Canada	83334.6
France	China	18718.3
France	China	87770.9
France	China, Hong Kong SAR	1308.96
France	China, Hong Kong SAR	221383
France	Costa Rica	306043
France	Côte d'Ivoire	22.844
France	Croatia	869.211
France	Cyprus	1812.66
France	Czechia	5834.34
France	Czechia	364.361
France	Denmark	10877.1
France	Estonia	142.774
France	Finland	1970.29
France	Germany	1.192e+07
France	Germany	147173
France	Greece	9652.7
France	Hungary	5.711
France	Iran	119925
France	Ireland	2765.26
France	Israel	750.423
France	Italy	4.77128e+07
France	Italy	167488
France	Japan	8641.85
France	Japan	1541.96
France	Lithuania	33.124
France	Lithuania	1980.57
France	Luxembourg	48850.6
France	Luxembourg	14020.5
France	Malaysia	2493.41
France	Malta	92.518
France	Mauritius	161364
France	Mexico	45108.7
France	Morocco	396743
France	Netherlands	1.48063e+06
France	Netherlands	21875.3
France	New Caledonia	322.099
France	New Caledonia	516.273
France	Other Asia, nes	344.943
France	Poland	168695
France	Poland	16011.3
France	Portugal	771129
France	Portugal	80348.9
France	Rep. of Korea	51888.8
France	Romania	2440.87
France	Romania	145.059
France	Russian Federation	32669.1
France	Saint Pierre and Miquelon	710.446
France	Singapore	17459.6
France	Singapore	4592.77
France	Slovakia	267.274
France	South Africa	98922.2
France	Spain	1.88123e+07
France	Spain	209529
France	Sri Lanka	56590.1
France	Sweden	524.268
France	Sweden	23320.2
France	Switzerland	3.13414e+07
France	Switzerland	360045
France	Thailand	183615
France	Thailand	50975.1
France	Tunisia	804.106
France	Türkiye	6446.55
France	United Arab Emirates	5437.99
France	United Kingdom	77516.3
France	United Kingdom	2.9928e+06
France	USA	1.0552e+07
France	USA	503487
France	Viet Nam	64932.7
France	Viet Nam	1091.94
French Polynesia	Areas, nes	79941
French Polynesia	Chile	4297.56
French Polynesia	China, Hong Kong SAR	9131.75
French Polynesia	France	134762
French Polynesia	New Caledonia	55045.9
French Polynesia	Switzerland	2776.01
French Polynesia	USA	217076
French Polynesia	Viet Nam	38.201
French Polynesia	Wallis and Futuna Isds	62037.2
Germany	Albania	11881.7
Germany	Argentina	1.18592e+07
Germany	Australia	6.69845e+06
Germany	Australia	7291.15
Germany	Austria	8.5668e+07
Germany	Austria	404135
Germany	Bangladesh	2489.08
Germany	Belarus	249.251
Germany	Belgium	2.06959e+08
Germany	Belgium	39166.7
Germany	Brazil	3.938e+08
Germany	Bulgaria	128602
Germany	Bulgaria	810.636
Germany	Bunkers	7694.76
Germany	Canada	2.71505e+07
Germany	Canada	11530.7
Germany	Chile	32147.6
Germany	China	5.49325e+08
Germany	China	153860
Germany	China, Hong Kong SAR	2.91799e+07
Germany	China, Hong Kong SAR	78883.3
Germany	China, Macao SAR	892.958
Germany	Colombia	2463.92
Germany	Costa Rica	8391.06
Germany	Croatia	278605
Germany	Cyprus	42665.3
Germany	Czechia	1.03486e+07
Germany	Czechia	116666
Germany	Denmark	8.77467e+06
Germany	Denmark	5013.6
Germany	Dominican Rep.	7198.54
Germany	Dominican Rep.	367.016
Germany	Egypt	548.809
Germany	Egypt	65.171
Germany	Estonia	37476.8
Germany	Estonia	1048.45
Germany	Finland	712617
Germany	Finland	4744.91
Germany	France	1.72525e+08
Germany	France	86197.3
Germany	Greece	106905
Germany	Greece	1442.91
Germany	Hungary	928352
Germany	Hungary	7511.82
Germany	Iceland	160951
Germany	India	6.53998e+07
Germany	Indonesia	15116.3
Germany	Iran	117306
Germany	Iraq	4198.39
Germany	Ireland	9.76587e+07
Germany	Ireland	179.506
Germany	Israel	713472
Germany	Italy	2.46098e+08
Germany	Italy	27018.5
Germany	Japan	1.64556e+08
Germany	Japan	16711.2
Germany	Jordan	139.489
Germany	Kazakhstan	2411.33
Germany	Latvia	5784.22
Germany	Lithuania	14147.8
Germany	Lithuania	9981.46
Germany	Luxembourg	567065
Germany	Luxembourg	12594
Germany	Malaysia	2.96298e+06
Germany	Malaysia	401761
Germany	Malta	1990.58
Germany	Mexico	485290
Germany	Morocco	7030.47
Germany	Netherlands	3.04388e+07
Germany	Netherlands	67705.9
Germany	New Zealand	368123
Germany	North Macedonia	771.762
Germany	Norway	7.38673e+06
Germany	Norway	133231
Germany	Other Asia, nes	1.88307e+07
Germany	Other Asia, nes	4463.65
Germany	Pakistan	298.415
Germany	Poland	1.58568e+06
Germany	Poland	179631
Germany	Portugal	126625
Germany	Portugal	5436.64
Germany	Qatar	710890
Germany	Qatar	1990.58
Germany	Rep. of Korea	5.73732e+07
Germany	Rep. of Korea	13273.2
Germany	Romania	492283
Germany	Romania	7196.26
Germany	Russian Federation	3.28457e+07
Germany	Russian Federation	2567.97
Germany	Saudi Arabia	5097.06
Germany	Saudi Arabia	3018.45
Germany	Serbia	2686.88
Germany	Singapore	1.37346e+07
Germany	Singapore	3576.4
Germany	Slovakia	1.06067e+06
Germany	Slovakia	4920.99
Germany	Slovenia	127297
Germany	Slovenia	768.332
Germany	South Africa	1.03397e+08
Germany	Spain	7.60049e+06
Germany	Spain	15905.2
Germany	Sri Lanka	6724.05
Germany	Sweden	4.89328e+06
Germany	Sweden	17032.5
Germany	Switzerland	3.67282e+08
Germany	Switzerland	927772
Germany	Thailand	2.30418e+07
Germany	Thailand	6702.33
Germany	Türkiye	785608
Germany	Ukraine	3.10293e+06
Germany	United Arab Emirates	955629
Germany	United Arab Emirates	2318.72
Germany	United Kingdom	1.0153e+09
Germany	United Kingdom	90521.4
Germany	Uruguay	3016.16
Germany	USA	1.95228e+09
Germany	USA	152369
Germany	Viet Nam	337795
Greece	Belgium	15121.5
Greece	Bulgaria	182.751
Greece	Cyprus	9.138
Greece	Germany	482973
Greece	Germany	115.362
Greece	Poland	201.026
Greece	Portugal	1235.86
Greece	Spain	5332.91
Greece	Switzerland	550.538
Greece	United Kingdom	816.67
Hungary	Austria	78377
Hungary	Belgium	104228
Hungary	Bosnia Herzegovina	9
Hungary	Croatia	886
Hungary	Germany	6011993
Hungary	Italy	3191345
Hungary	Mauritius	35183
Hungary	Montenegro	4
Hungary	Serbia	56
Hungary	Slovakia	5418
Hungary	Slovenia	299
Hungary	Spain	76
Hungary	Ukraine	338
Hungary	United Arab Emirates	4335
India	Australia	2690.01
India	Austria	31.493
India	Bahrain	8635.39
India	Bangladesh	1263.46
India	Belgium	527.065
India	Brazil	1453.19
India	Canada	3611.49
India	China, Hong Kong SAR	457.135
India	Egypt	495.964
India	France	3350.02
India	Germany	369424
India	Germany	4344.28
India	Israel	4848.73
India	Italy	522227
India	Japan	3.4009e+06
India	Japan	4.872
India	Malaysia	497.791
India	Nepal	54.136
India	Netherlands	6901.39
India	Russian Federation	1412.99
India	Singapore	2.59867e+06
India	Spain	4792.59
India	Sweden	1173.63
India	Switzerland	4.43436e+06
India	United Arab Emirates	29.842
India	United Kingdom	5.41244e+06
India	United Kingdom	11793.9
India	USA	2.73394e+06
India	USA	34510.8
Indonesia	China	10147.6
Indonesia	Singapore	51
Indonesia	Singapore	624
Indonesia	USA	54.7
Ireland	China	92021
Ireland	France	61800.8
Ireland	Germany	10998.2
Ireland	Hungary	1530.54
Ireland	India	21283.7
Ireland	Italy	42448.6
Ireland	New Zealand	2857.77
Ireland	New Zealand	82.238
Ireland	Russian Federation	1506.56
Ireland	Singapore	61393
Ireland	South Africa	2172.46
Ireland	Spain	5315.78
Ireland	Sweden	1809.24
Ireland	Switzerland	2149.61
Ireland	Thailand	1195.88
Ireland	Türkiye	38926
Ireland	United Kingdom	233242
Ireland	United Kingdom	9769.2
Ireland	USA	2.57801e+06
Ireland	USA	397.484
Israel	Areas, nes	1000
Israel	Canada	15000
Israel	Germany	122000
Israel	Switzerland	7000
Israel	USA	2000
Italy	Australia	109366
Italy	Australia	11776
Italy	Austria	4.11336e+06
Italy	Austria	172.472
Italy	Bahamas	1607.07
Italy	Bahrain	20830.2
Italy	Belgium	1.34641e+08
Italy	Belgium	1224.43
Italy	Brazil	52142.4
Italy	Bulgaria	1692.73
Italy	Canada	80150.2
Italy	Canada	3390.04
Italy	China	451702
Italy	China	4062.79
Italy	China, Hong Kong SAR	1.28449e+07
Italy	China, Hong Kong SAR	107653
Italy	Colombia	148411
Italy	Croatia	1.0588e+06
Italy	Croatia	2793.81
Italy	Cyprus	415.759
Italy	Czechia	3.57908e+06
Italy	Czechia	5390.02
Italy	Denmark	109997
Italy	Denmark	103.94
Italy	Estonia	1708.72
Italy	Finland	9.29064e+06
Italy	France	1.24333e+08
Italy	France	44025.9
Italy	Germany	1.22052e+09
Italy	Germany	3289.52
Italy	Greece	253.568
Italy	Greece	1449.45
Italy	Hungary	7.13135e+06
Italy	Iceland	6004.52
Italy	India	9.45783e+06
Italy	Iran	5870.89
Italy	Ireland	1.36271e+06
Italy	Ireland	22.844
Italy	Israel	41387.5
Italy	Japan	2826.93
Italy	Japan	300234
Italy	Latvia	352.939
Italy	Lithuania	2.4206e+06
Italy	Lithuania	239.861
Italy	Luxembourg	291335
Italy	Malta	225609
Italy	Malta	31.981
Italy	Mexico	835763
Italy	Netherlands	9.79504e+07
Italy	Netherlands	1821.8
Italy	New Zealand	115133
Italy	Norway	14520.7
Italy	Other Asia, nes	2320.94
Italy	Peru	6499.1
Italy	Philippines	1408.33
Italy	Poland	5.86036e+08
Italy	Poland	896.624
Italy	Portugal	2.43962e+07
Italy	Portugal	5731.54
Italy	Rep. of Korea	79173.6
Italy	Rep. of Korea	17500.7
Italy	Romania	399817
Italy	Romania	2275.25
Italy	Saudi Arabia	1208.44
Italy	Serbia	5196.99
Italy	Singapore	1182.17
Italy	Slovakia	1.32685e+06
Italy	Slovakia	371.214
Italy	Slovenia	3.427
Italy	South Africa	133721
Italy	Spain	9.77303e+07
Italy	Spain	3014.26
Italy	Sweden	809000
Italy	Sweden	50.257
Italy	Switzerland	6.22785e+08
Italy	Switzerland	209058
Italy	Syria	3700.72
Italy	Thailand	3.17365e+06
Italy	Thailand	47251.5
Italy	Türkiye	400315
Italy	Ukraine	6111.89
Italy	United Arab Emirates	114723
Italy	United Arab Emirates	19402.5
Italy	United Kingdom	3.95494e+08
Italy	United Kingdom	27466.4
Italy	USA	4.16657e+08
Italy	USA	115935
Italy	Viet Nam	140523
Japan	Australia	166910
Japan	Australia	5597.12
Japan	Austria	6.641e+06
Japan	Bahrain	261499
Japan	Belgium	1.89183e+06
Japan	Bulgaria	5.27601e+06
Japan	Cambodia	12028.7
Japan	China	1.67467e+08
Japan	China	543221
Japan	China, Hong Kong SAR	2.6782e+08
Japan	China, Hong Kong SAR	5.66928e+06
Japan	China, Macao SAR	47814.6
Japan	Czechia	48274
Japan	Denmark	2793.87
Japan	Egypt	3347.02
Japan	France	2.92678e+06
Japan	France	9675.42
Japan	Germany	4.18716e+07
Japan	Germany	4509.57
Japan	Hungary	10828.6
Japan	India	656879
Japan	Indonesia	8.85507e+06
Japan	Ireland	2700.12
Japan	Israel	3150.14
Japan	Italy	325617
Japan	Italy	2043.84
Japan	Malaysia	9.20178e+07
Japan	Malaysia	20916.5
Japan	Malta	105614
Japan	Mexico	573484
Japan	New Zealand	1.84065e+06
Japan	Other Asia, nes	1.1467e+08
Japan	Other Asia, nes	183449
Japan	Philippines	891761
Japan	Philippines	4612.7
Japan	Rep. of Korea	1.47853e+08
Japan	Rep. of Korea	108548
Japan	Russian Federation	141466
Japan	Singapore	6.6193e+07
Japan	Singapore	8606.63
Japan	Switzerland	4.03905e+08
Japan	Thailand	3.43464e+07
Japan	Thailand	13988.1
Japan	Türkiye	69884.3
Japan	United Kingdom	7.65394e+07
Japan	United Kingdom	109617
Japan	USA	1.36067e+08
Japan	USA	89450.8
Japan	Viet Nam	7.75596e+06
Kazakhstan	Kyrgyzstan	198.54
Kenya	Bunkers	6684.97
Kenya	Rwanda	37.698
Kenya	USA	15467.9
Lao People's Dem. Rep.	China	40
Latvia	Belgium	736.716
Latvia	Estonia	137.064
Lebanon	France	121751
Lebanon	Italy	766578
Lithuania	Belarus	90
Lithuania	Estonia	2075
Lithuania	Finland	253
Lithuania	Latvia	5208
Lithuania	Poland	8
Lithuania	Switzerland	84677
Luxembourg	Belgium	121073
Luxembourg	France	66.247
Luxembourg	France	513.6
Luxembourg	Germany	62732
Luxembourg	Germany	212.608
Luxembourg	Switzerland	9122.05
Madagascar	France	32.406
Malawi	South Africa	0.667
Malaysia	China, Hong Kong SAR	313384
Malaysia	Italy	431922
Malaysia	Japan	586951
Malaysia	Switzerland	289391
Malta	Germany	130.21
Mexico	USA	12054
Myanmar	China	821410
Netherlands	Areas, nes	223.87
Netherlands	Australia	1681.31
Netherlands	Austria	29047.2
Netherlands	Austria	846.367
Netherlands	Belgium	1.8441e+07
Netherlands	Belgium	21480.1
Netherlands	Bulgaria	33.124
Netherlands	Bunkers	1442.59
Netherlands	Canada	233.008
Netherlands	China	118060
Netherlands	China, Hong Kong SAR	13951.9
Netherlands	Croatia	227.297
Netherlands	Croatia	9.138
Netherlands	Cyprus	34.266
Netherlands	Cyprus	397.484
Netherlands	Czechia	317.53
Netherlands	Czechia	539.117
Netherlands	Denmark	28758.2
Netherlands	Denmark	684.175
Netherlands	Estonia	391.773
Netherlands	Estonia	46.83
Netherlands	Finland	17200.3
Netherlands	Finland	452.31
Netherlands	France	16974.2
Netherlands	France	18826.8
Netherlands	Germany	1.88854e+07
Netherlands	Germany	34525.2
Netherlands	Ghana	5710.98
Netherlands	Greece	23.986
Netherlands	Greece	70.816
Netherlands	Hungary	271.843
Netherlands	Hungary	392.915
Netherlands	Iceland	163.334
Netherlands	India	11407.1
Netherlands	Ireland	1066.81
Netherlands	Ireland	1079.38
Netherlands	Italy	4619.04
Netherlands	Italy	17773.7
Netherlands	Japan	60093.2
Netherlands	Latvia	239.861
Netherlands	Latvia	368.929
Netherlands	Lithuania	122.215
Netherlands	Lithuania	173.614
Netherlands	Luxembourg	74.243
Netherlands	Luxembourg	1892.62
Netherlands	Malta	2.284
Netherlands	Malta	103.94
Netherlands	Mauritius	2505.98
Netherlands	New Zealand	1014.27
Netherlands	Norway	27.413
Netherlands	Poland	198.742
Netherlands	Poland	15884.5
Netherlands	Portugal	23.986
Netherlands	Portugal	229.581
Netherlands	Rep. of Korea	9110.16
Netherlands	Romania	778.978
Netherlands	Romania	646.483
Netherlands	Singapore	11032.5
Netherlands	Slovakia	241.003
Netherlands	Slovakia	173.614
Netherlands	Slovenia	270.7
Netherlands	Slovenia	102.798
Netherlands	Spain	608.79
Netherlands	Spain	2122.2
Netherlands	Sweden	21626.3
Netherlands	Sweden	10389.4
Netherlands	Switzerland	4082.21
Netherlands	Switzerland	193.031
Netherlands	Türkiye	3009.69
Netherlands	United Kingdom	1.38635e+06
Netherlands	United Kingdom	12124.4
Netherlands	USA	24356.2
Netherlands	USA	14544.7
New Zealand	Australia	1.73174e+06
New Zealand	Australia	28303.7
New Zealand	China, Hong Kong SAR	647915
New Zealand	Cook Isds	825.52
New Zealand	France	775.587
New Zealand	India	767.156
New Zealand	Samoa	2131.57
New Zealand	Thailand	674989
New Zealand	USA	3348.12
North Macedonia	France	42.44
North Macedonia	Slovenia	172.54
North Macedonia	USA	142.96
Norway	Australia	1391.58
Norway	Canada	3492.54
Norway	Czechia	154732
Norway	Denmark	6887.31
Norway	Denmark	5563.89
Norway	Germany	1035.09
Norway	Italy	6190.46
Norway	Netherlands	44651
Norway	Rep. of Korea	1.60327e+08
Norway	Sweden	14451
Norway	Türkiye	10743.9
Norway	Ukraine	1.83855e+06
Norway	United Kingdom	4.27409e+08
Norway	United Kingdom	177.504
Norway	USA	1.14452e+07
Oman	Qatar	93469.4
Other Asia, nes	Areas, nes	27261.9
Other Asia, nes	China	2.92835e+06
Other Asia, nes	China	36927.8
Other Asia, nes	China, Hong Kong SAR	2.92436e+07
Other Asia, nes	China, Hong Kong SAR	53196.4
Other Asia, nes	Croatia	10278.5
Other Asia, nes	Germany	1.80953e+06
Other Asia, nes	India	3845.93
Other Asia, nes	Iran	494560
Other Asia, nes	Japan	7.74686e+07
Other Asia, nes	Japan	1974.02
Other Asia, nes	Malaysia	2.86628e+07
Other Asia, nes	Malaysia	68.07
Other Asia, nes	Netherlands	3233.31
Other Asia, nes	New Zealand	2790.85
Other Asia, nes	Paraguay	2042.09
Other Asia, nes	Philippines	4.45733e+06
Other Asia, nes	Rep. of Korea	601123
Other Asia, nes	Saudi Arabia	5853.98
Other Asia, nes	Singapore	1.08021e+08
Other Asia, nes	Switzerland	1.89703e+07
Other Asia, nes	Thailand	2110.16
Other Asia, nes	United Kingdom	9.08065e+06
Other Asia, nes	USA	3.48077e+07
Other Asia, nes	USA	12388.7
Pakistan	Estonia	378.911
Pakistan	USA	611.221
Papua New Guinea	Fiji	63941.8
Peru	Switzerland	385384
Philippines	Australia	9045
Philippines	Canada	288
Philippines	China, Hong Kong SAR	397927
Philippines	China, Macao SAR	50
Philippines	Cyprus	85
Philippines	Denmark	850
Philippines	France	450
Philippines	Guam	100
Philippines	Ireland	30
Philippines	Japan	158801
Philippines	Japan	5860
Philippines	Netherlands	368
Philippines	New Zealand	25
Philippines	Other Asia, nes	183
Philippines	Rep. of Korea	46158
Philippines	Singapore	630
Philippines	Ukraine	970
Philippines	United Kingdom	14491
Philippines	USA	582942
Poland	Albania	3
Poland	Areas, nes	571
Poland	Austria	5880
Poland	Belgium	648
Poland	Bosnia Herzegovina	39
Poland	Bulgaria	18
Poland	Canada	40020
Poland	China	338534
Poland	China	2476
Poland	China, Hong Kong SAR	11392
Poland	China, Macao SAR	225
Poland	Croatia	1063
Poland	Croatia	102
Poland	Czechia	3287672
Poland	Czechia	31036
Poland	Denmark	93
Poland	Estonia	75
Poland	Finland	92
Poland	France	498
Poland	Germany	23222260
Poland	Germany	78793
Poland	Greece	238
Poland	Hungary	28
Poland	Indonesia	6
Poland	Ireland	27
Poland	Israel	700
Poland	Italy	17756144
Poland	Italy	657
Poland	Japan	4091
Poland	Japan	380
Poland	Latvia	64
Poland	Lithuania	493
Poland	Luxembourg	58
Poland	Malta	14
Poland	Mexico	470
Poland	Morocco	5
Poland	Netherlands	1556
Poland	New Zealand	360
Poland	Norway	180
Poland	Oman	8
Poland	Other Asia, nes	380
Poland	Portugal	55
Poland	Romania	9725
Poland	Russian Federation	1549
Poland	Singapore	169
Poland	Slovakia	126
Poland	Slovenia	28
Poland	Spain	46618
Poland	Sweden	84
Poland	Switzerland	38105
Poland	Ukraine	20745
Poland	Ukraine	4820
Poland	United Arab Emirates	79
Poland	United Kingdom	23
Poland	USA	298
Poland	USA	3212
Poland	Viet Nam	564
Portugal	Albania	1133.06
Portugal	Algeria	212.448
Portugal	Angola	1226.72
Portugal	Aruba	86.807
Portugal	Austria	130.21
Portugal	Belgium	344.943
Portugal	Bulgaria	154.196
Portugal	Cambodia	758.418
Portugal	Colombia	293.544
Portugal	Cyprus	523.126
Portugal	Dominican Rep.	106.224
Portugal	Ecuador	4515.1
Portugal	Egypt	3907.45
Portugal	France	194916
Portugal	France	2284.39
Portugal	Georgia	18.275
Portugal	Germany	94315.7
Portugal	Greece	622.497
Portugal	Guatemala	292.402
Portugal	Honduras	39.977
Portugal	Hungary	459.163
Portugal	Iraq	67.39
Portugal	Ireland	1505.41
Portugal	Israel	79.954
Portugal	Italy	117980
Portugal	Italy	647.625
Portugal	Jordan	156.481
Portugal	Kuwait	352.939
Portugal	Malta	110.793
Portugal	Mauritania	882.918
Portugal	Mexico	134.779
Portugal	Montserrat	165.618
Portugal	Morocco	7463.11
Portugal	Mozambique	74.243
Portugal	Paraguay	41.119
Portugal	Peru	103.94
Portugal	Philippines	1080.52
Portugal	Poland	400.911
Portugal	Qatar	107.366
Portugal	Romania	100.513
Portugal	Saudi Arabia	222.728
Portugal	Spain	39392.1
Portugal	Spain	12430.5
Portugal	Switzerland	11.422
Portugal	Trinidad and Tobago	890.913
Portugal	Tunisia	8685.26
Portugal	United Arab Emirates	1457.44
Portugal	USA	16003.3
Portugal	USA	1853.78
Portugal	Viet Nam	2777.82
Rep. of Korea	Belgium	6398
Rep. of Korea	Canada	3334
Rep. of Korea	China	5322443
Rep. of Korea	China	1355
Rep. of Korea	China, Hong Kong SAR	79524606
Rep. of Korea	China, Hong Kong SAR	3045
Rep. of Korea	France	120
Rep. of Korea	Germany	25273841
Rep. of Korea	Iceland	164
Rep. of Korea	India	11000
Rep. of Korea	Indonesia	867461
Rep. of Korea	Israel	372573
Rep. of Korea	Italy	7350472
Rep. of Korea	Japan	60628184
Rep. of Korea	Japan	1065
Rep. of Korea	Malaysia	27556
Rep. of Korea	Mexico	233
Rep. of Korea	Other Asia, nes	8492624
Rep. of Korea	Poland	513
Rep. of Korea	Singapore	762
Rep. of Korea	Switzerland	7218917
Rep. of Korea	Thailand	25165
Rep. of Korea	United Kingdom	209169652
Rep. of Korea	USA	58849761
Rep. of Korea	USA	54737
Rep. of Korea	Viet Nam	1362705
Russian Federation	Belarus	1.93434e+07
Russian Federation	Belarus	33381.3
Russian Federation	China	1.64053e+07
Russian Federation	China, Hong Kong SAR	7.52585e+08
Russian Federation	Germany	8.49436e+08
Russian Federation	Germany	1002.29
Russian Federation	India	51887
Russian Federation	Italy	4.25741e+08
Russian Federation	Japan	1.08797e+09
Russian Federation	Kazakhstan	19705.8
Russian Federation	Latvia	362782
Russian Federation	Poland	1.46207e+06
Russian Federation	Portugal	17688.1
Russian Federation	Rep. of Korea	2.56135e+08
Russian Federation	Rep. of Moldova	6231.77
Russian Federation	Slovakia	10.96
Russian Federation	Switzerland	3.02722e+08
Russian Federation	Ukraine	251952
Russian Federation	United Arab Emirates	32867.7
Russian Federation	United Kingdom	2.04329e+09
Russian Federation	USA	2.08633e+09
Saint Lucia	Trinidad and Tobago	100.62
Saint Lucia	USA	47586.2
Senegal	Germany	96.438
Serbia	Israel	10567
Serbia	Montenegro	1784
Serbia	Slovenia	51763
Serbia	Switzerland	7245251
Singapore	Australia	1.20753e+07
Singapore	Australia	761.652
Singapore	Austria	383120
Singapore	Brazil	139724
Singapore	China	314156
Singapore	China, Hong Kong SAR	1.05749e+07
Singapore	China, Hong Kong SAR	5923.64
Singapore	France	1506.64
Singapore	France	4767.03
Singapore	Germany	1.66646e+07
Singapore	Indonesia	665717
Singapore	Italy	3.31841e+07
Singapore	Japan	3.26397e+07
Singapore	Malaysia	491103
Singapore	Malaysia	3564.04
Singapore	Philippines	1416.05
Singapore	South Africa	1637.81
Singapore	Spain	1140.67
Singapore	Switzerland	4.98628e+06
Singapore	Switzerland	10125.4
Singapore	Thailand	578770
Singapore	United Kingdom	9.03243e+07
Singapore	USA	1.4639e+08
Singapore	Viet Nam	217616
Slovakia	Austria	29803.3
Slovakia	Czechia	278.696
Slovakia	Germany	1966.86
Slovakia	Hungary	307156
Slovakia	Poland	380.351
Slovakia	Spain	153.054
Slovakia	Ukraine	25947.3
Slovakia	United Kingdom	1.66094e+07
Slovenia	Austria	5166.72
Slovenia	Bosnia Herzegovina	5721.57
Slovenia	Croatia	50940
Slovenia	Croatia	11745.4
Slovenia	Germany	56189.9
Slovenia	Italy	138658
Slovenia	Montenegro	133.27
Slovenia	North Macedonia	72.22
Slovenia	Serbia	12.44
Slovenia	Serbia	2462.07
Slovenia	Sweden	2017.57
South Africa	Belgium	290961
South Africa	Botswana	5265.69
South Africa	Botswana	1620.86
South Africa	China	1.26373e+08
South Africa	China, Hong Kong SAR	1.06967e+09
South Africa	Dem. People's Rep. of Korea	166527
South Africa	Dem. Rep. of the Congo	294.234
South Africa	Eswatini	75.091
South Africa	Eswatini	62.096
South Africa	Germany	8.70535e+08
South Africa	India	8.15113e+07
South Africa	Italy	1.68878e+06
South Africa	Japan	2.31808e+09
South Africa	Kenya	2444.84
South Africa	Lesotho	177.154
South Africa	Lithuania	41.683
South Africa	Mauritius	698.929
South Africa	Mozambique	44.871
South Africa	Namibia	2495.66
South Africa	Namibia	2911.14
South Africa	Netherlands	1.4556e+08
South Africa	Nigeria	162.565
South Africa	Other Asia, nes	3.261e+06
South Africa	Poland	1.25415e+06
South Africa	Qatar	1.11598e+07
South Africa	Rep. of Korea	1.1712e+08
South Africa	Switzerland	6.40849e+08
South Africa	Türkiye	5.65107e+06
South Africa	Uganda	69.513
South Africa	United Arab Emirates	4.79439e+06
South Africa	United Kingdom	2.04817e+09
South Africa	United Kingdom	16.551
South Africa	United Rep. of Tanzania	776.35
South Africa	USA	3.29489e+09
South Africa	USA	364.728
South Africa	Zambia	720.2
South Africa	Zimbabwe	53715.9
South Africa	Zimbabwe	469.672
Spain	Algeria	542.446
Spain	Andorra	802.624
Spain	Andorra	1877.07
Spain	Areas, nes	401.541
Spain	Argentina	10021.8
Spain	Armenia	259.527
Spain	Aruba	1285.11
Spain	Australia	5716.7
Spain	Australia	10201.9
Spain	Austria	26320.1
Spain	Azerbaijan	396.11
Spain	Bahrain	301.007
Spain	Belgium	300060
Spain	Belgium	33042.5
Spain	Bosnia Herzegovina	2177.18
Spain	Brazil	23846
Spain	Bulgaria	2748.59
Spain	Canada	29089.4
Spain	Chile	24871.1
Spain	China	93111.5
Spain	China, Hong Kong SAR	15127.6
Spain	China, Macao SAR	331.82
Spain	Colombia	23979
Spain	Costa Rica	4311.97
Spain	Croatia	14275.7
Spain	Curaçao	454.626
Spain	Cyprus	12996.3
Spain	Czechia	3970.28
Spain	Denmark	4635.1
Spain	Dominican Rep.	4943.18
Spain	Ecuador	6390.87
Spain	Egypt	10175.1
Spain	El Salvador	916.135
Spain	Estonia	936.624
Spain	Finland	3004.7
Spain	France	5.23024e+06
Spain	France	167267
Spain	Georgia	829.55
Spain	Germany	6.33916e+06
Spain	Germany	81024
Spain	Greece	46665.1
Spain	Greece	57577.4
Spain	Guatemala	1526.92
Spain	Honduras	2155.26
Spain	Hungary	4956.38
Spain	Iceland	121.846
Spain	India	13282.5
Spain	India	13140.7
Spain	Indonesia	4515.96
Spain	Ireland	17198.6
Spain	Israel	24255.8
Spain	Italy	1.20111e+07
Spain	Italy	152354
Spain	Japan	63447.2
Spain	Jordan	2495.86
Spain	Kazakhstan	1237.31
Spain	Kuwait	19436.2
Spain	Latvia	1047.3
Spain	Lebanon	6555.99
Spain	Lithuania	3331.69
Spain	Luxembourg	6517.04
Spain	Malaysia	58854
Spain	Mali	7471.8
Spain	Malta	4412.15
Spain	Mexico	335481
Spain	Montenegro	73.094
Spain	Morocco	2762.03
Spain	Netherlands	314549
Spain	Netherlands	29989.2
Spain	New Zealand	404.777
Spain	Nicaragua	732.378
Spain	Nigeria	70.43
Spain	North Macedonia	148.314
Spain	Norway	3126.5
Spain	Oman	126.602
Spain	Other Asia, nes	9788.62
Spain	Panama	2341.35
Spain	Paraguay	817.808
Spain	Peru	4993.6
Spain	Philippines	5428.38
Spain	Poland	203148
Spain	Portugal	9.85357e+06
Spain	Portugal	130988
Spain	Qatar	9878.74
Spain	Rep. of Korea	46720.6
Spain	Romania	11253.3
Spain	Russian Federation	125018
Spain	Saudi Arabia	35567.4
Spain	Serbia	2818.53
Spain	Singapore	10361.9
Spain	Slovakia	2409.02
Spain	Slovenia	2614.82
Spain	South Africa	2807.52
Spain	Sweden	7830.73
Spain	Switzerland	220.093
Spain	Switzerland	28303.6
Spain	Thailand	14252.8
Spain	Türkiye	47436.7
Spain	Ukraine	2974.5
Spain	United Arab Emirates	21919.3
Spain	United Kingdom	3.23959e+07
[truncated: 403 more rows]

## Sheet: 2021
source	target	weight
[truncated: 2,033 more rows]

[truncated: 2 more sheets: 2022, 2023]
