# Supplementary material for: Structure, evolution, and resilience of the pearl goods global trade network
Source: Research Square preprint supplement (doi:10.21203/rs.3.rs-7043164/v1), 2025-10-03
Supplement: Supplementary file 2 [file b51ad309a61b5cedce055d60.xlsx]

## Sheet: 2012
source	target	weight
Albania	Germany	8999
Albania	Italy	22826
Albania	Italy	1326
Albania	Japan	86
Algeria	Austria	45637
Algeria	China	71409
Algeria	France	8281
Andorra	France	242.82
Andorra	Japan	663.095
Andorra	Spain	735.532
Andorra	Spain	72059.2
Angola	Belgium	1498
Angola	Brazil	502
Angola	China	727
Angola	China, Hong Kong SAR	62
Angola	Portugal	4946
Angola	South Africa	184
Angola	United Kingdom	79
Angola	USA	3594
Antigua and Barbuda	China	34522
Antigua and Barbuda	China, Hong Kong SAR	639
Antigua and Barbuda	Italy	259
Antigua and Barbuda	Other Asia, nes	47
Argentina	Austria	46762
Argentina	China	315
Argentina	Germany	2073300
Argentina	Russian Federation	84989
Argentina	South Africa	310586
Argentina	United Kingdom	36732396
Argentina	USA	2871544
Armenia	China	1788
Armenia	Netherlands	273
Aruba	China, Hong Kong SAR	208
Aruba	China, Hong Kong SAR	47789
Aruba	Germany	8660
Aruba	Japan	6866
Aruba	Netherlands	1653
Aruba	Spain	10588
Aruba	Switzerland	5099
Aruba	USA	2527
Aruba	USA	39997
Australia	Australia	131155
Australia	Australia	5200099
Australia	Austria	424657
Australia	Canada	2575
Australia	China	3092089
Australia	China, Hong Kong SAR	6107911
Australia	China, Hong Kong SAR	1752535
Australia	Cook Isds	5941
Australia	Denmark	2310
Australia	France	49031
Australia	French Polynesia	22571
Australia	Germany	6300267
Australia	India	5493
Australia	Indonesia	14275
Australia	Italy	1420101
Australia	Italy	6821
Australia	Japan	1934050
Australia	Japan	63402
Australia	Malaysia	42252
Australia	Netherlands	54030
Australia	New Zealand	2326465
Australia	New Zealand	62637
Australia	Niger	20956
Australia	Other Asia, nes	6660
Australia	Philippines	9132
Australia	Saudi Arabia	14541
Australia	Singapore	4679
Australia	South Africa	25402
Australia	South Africa	12992
Australia	Spain	5228
Australia	Spain	1236
Australia	Switzerland	3608643
Australia	Switzerland	56928
Australia	Thailand	4890
Australia	Thailand	228257
Australia	United Arab Emirates	12835
Australia	United Kingdom	9499609
Australia	United Kingdom	4372
Australia	USA	8591663
Australia	USA	195410
Austria	Australia	5555
Austria	Belgium	1829393
Austria	Belgium	231
Austria	Canada	243
Austria	China	1408130
Austria	China, Hong Kong SAR	104518
Austria	Czechia	112355
Austria	Denmark	26443
Austria	France	38284
Austria	France	2198
Austria	French Polynesia	2329
Austria	Germany	54544556
Austria	Germany	569877
Austria	Greece	94616
Austria	Hungary	65350
Austria	Hungary	7096
Austria	Israel	99
Austria	Italy	1400950
Austria	Italy	57705
Austria	Japan	181057
Austria	Japan	34358
Austria	Mexico	17812
Austria	Netherlands	57859
Austria	Netherlands	2044
Austria	Pakistan	58
Austria	Peru	645
Austria	Philippines	267
Austria	Poland	643
Austria	Poland	614
Austria	Portugal	31562
Austria	Rep. of Korea	19
Austria	Slovakia	293745
Austria	Slovenia	24508
Austria	Spain	6991
Austria	Sweden	939894
Austria	Switzerland	2390898
Austria	Switzerland	1686734
Austria	Thailand	313192
Austria	Thailand	4909
Austria	Türkiye	194
Austria	United Kingdom	9156750
Austria	United Kingdom	1298
Austria	USA	1205993
Austria	USA	9973
Austria	Viet Nam	211
Azerbaijan	Germany	904
Azerbaijan	Türkiye	77
Azerbaijan	USA	1605
Bahamas	Areas, nes	6468
Bahamas	USA	9461
Bahamas	USA	22481
Bahrain	China	202
Bahrain	China	253
Bahrain	India	24149
Bahrain	Switzerland	351
Bahrain	United Kingdom	16907
Bahrain	United Kingdom	2689
Bangladesh	Other Europe, nes	986
Bangladesh	United Arab Emirates	12316
Bangladesh	United Arab Emirates	964
Bangladesh	USA	1056
Barbados	China	28940
Barbados	China, Hong Kong SAR	20557
Barbados	Japan	2183
Barbados	Other Asia, nes	311
Barbados	Thailand	173
Barbados	USA	1616
Barbados	USA	4220
Belgium	Austria	390567
Belgium	Canada	317.428
Belgium	China	13299.5
Belgium	China	101889
Belgium	China, Hong Kong SAR	8867.74
Belgium	Czechia	529111
Belgium	Denmark	113530
Belgium	Estonia	3.01807e+07
Belgium	France	2.5642e+06
Belgium	France	162673
Belgium	Germany	3.44293e+07
Belgium	Germany	20827.2
Belgium	Greece	25323.4
Belgium	India	18283.9
Belgium	Ireland	375.772
Belgium	Italy	4.2096e+06
Belgium	Japan	2036.2
Belgium	Latvia	782.382
Belgium	Luxembourg	96364.3
Belgium	Netherlands	927730
Belgium	Netherlands	11829.4
Belgium	Poland	19948.8
Belgium	Portugal	283386
Belgium	Romania	284937
Belgium	Spain	263450
Belgium	Sweden	1840.74
Belgium	Switzerland	1.54474e+06
Belgium	Türkiye	61012.7
Belgium	United Kingdom	1.40186e+07
Belgium	USA	381370
Belgium	USA	1471.92
Belize	USA	293
Bermuda	USA	5450
Bermuda	USA	50
Bhutan	India	2802
Bhutan	India	1856
Bolivia (Plurinational State of)	Japan	61.35
Bolivia (Plurinational State of)	USA	27449.9
Bosnia Herzegovina	Austria	811
Bosnia Herzegovina	China	14014
Bosnia Herzegovina	Germany	853
Bosnia Herzegovina	Italy	1139
Bosnia Herzegovina	Slovenia	5147
Bosnia Herzegovina	United Kingdom	27508
Botswana	India	1778.66
Botswana	South Africa	208.272
Botswana	South Africa	16975.5
Brazil	Austria	8311
Brazil	Belgium	34746025
Brazil	China	250
Brazil	China	48682
Brazil	China, Hong Kong SAR	7827
Brazil	France	1254
Brazil	Germany	50732457
Brazil	Indonesia	2372
Brazil	Italy	4548312
Brazil	Italy	68
Brazil	Japan	723
Brazil	Norway	42848457
Brazil	Norway	363
Brazil	Rep. of Korea	1024994
Brazil	Russian Federation	94240561
Brazil	South Africa	49269765
Brazil	Spain	5019
Brazil	Switzerland	17972
Brazil	United Kingdom	24206868
Brazil	USA	14014302
Brazil	USA	722
Brazil	Viet Nam	322
Brunei Darussalam	China	20031
Brunei Darussalam	Germany	8158
Brunei Darussalam	Malaysia	70
Brunei Darussalam	Singapore	52
Brunei Darussalam	USA	1490
Brunei Darussalam	USA	33
Bulgaria	Austria	23719
Bulgaria	Belgium	183
Bulgaria	China	73737
Bulgaria	China, Hong Kong SAR	6650
Bulgaria	Germany	6192
Bulgaria	India	1625
Bulgaria	Italy	7967
Bulgaria	Romania	19913
Bulgaria	Thailand	8238
Bulgaria	USA	752
Bulgaria	USA	8761
Burkina Faso	China	4607.98
Burkina Faso	Ghana	4368.03
Burkina Faso	Mali	383.917
Burundi	China	23
Burundi	Italy	70
Cameroon	Austria	5913
Cameroon	France	2520
Canada	Australia	19231
Canada	Australia	19719
Canada	Austria	334
Canada	Bangladesh	270
Canada	Belgium	17835209
Canada	Cameroon	1536
Canada	Canada	250021
Canada	Canada	30635
Canada	China	13534
Canada	China	2268769
Canada	China, Hong Kong SAR	376
Canada	China, Hong Kong SAR	38952
Canada	Denmark	6952
Canada	Finland	31
Canada	France	236
Canada	France	1683
Canada	French Polynesia	32587
Canada	Germany	4352860
Canada	Germany	2964
Canada	India	6685
Canada	India	108837
Canada	Indonesia	13630
Canada	Iran	1181
Canada	Ireland	223
Canada	Israel	67002
Canada	Italy	251468
Canada	Italy	23904
Canada	Japan	3452515
Canada	Japan	37712
Canada	Kenya	174
Canada	Mexico	3766
Canada	Mexico	77
Canada	Morocco	312
Canada	Nepal	138
Canada	Netherlands	65767
Canada	New Zealand	1153
Canada	New Zealand	1389
Canada	Norway	909798
Canada	Other Asia, nes	2382
Canada	Philippines	987
Canada	Rep. of Korea	2380
Canada	Russian Federation	92725177
Canada	Russian Federation	400
Canada	South Africa	23987389
Canada	Spain	33623
Canada	Sweden	352
Canada	Switzerland	21770974
Canada	Switzerland	8353
Canada	Thailand	152995
Canada	United Arab Emirates	5497
Canada	United Kingdom	35030686
Canada	USA	95852346
Canada	USA	1720374
Canada	Viet Nam	576
Chile	Areas, nes	1793.14
Chile	Austria	36426
Chile	Brazil	2376.84
Chile	China	8163.16
Chile	Germany	2603.34
Chile	India	37.58
Chile	Japan	341.5
Chile	Spain	137.6
Chile	Spain	17248.7
Chile	Thailand	1807.32
Chile	United Kingdom	129.67
Chile	USA	31148.8
Chile	USA	367.97
China	Areas, nes	380166181
China	Australia	4686558
China	Australia	1035
China	Belgium	15795477
China	Canada	8547
China	China	380757
China	China	144942
China	China, Hong Kong SAR	2364669
China	China, Hong Kong SAR	83922
China	France	912
China	France	9369
China	French Polynesia	135
China	Germany	138244846
China	Germany	7039
China	India	1610
China	Ireland	295359
China	Israel	707
China	Italy	5853519
China	Italy	19098
China	Japan	760402477
China	Japan	91515
China	Myanmar	4482
China	Norway	2567455
China	Other Asia, nes	6670094
China	Other Asia, nes	772
China	Philippines	731
China	Rep. of Korea	342698
China	Rep. of Korea	1083
China	Russian Federation	381176171
China	Singapore	12782653
China	Singapore	44
China	South Africa	2182842832
China	Spain	90
China	Switzerland	306290298
China	Thailand	34380
China	Thailand	8462
China	Türkiye	271
China	United Kingdom	185450138
China	United Kingdom	882
China	USA	86574204
China	USA	9970
China	Viet Nam	2907
China, Hong Kong SAR	Australia	368375
China, Hong Kong SAR	Australia	278387
China, Hong Kong SAR	Austria	2001
China, Hong Kong SAR	Canada	3674
China, Hong Kong SAR	China	2817165
China, Hong Kong SAR	China	7578471
China, Hong Kong SAR	China, Macao SAR	71907
China, Hong Kong SAR	France	185406
China, Hong Kong SAR	France	158302
China, Hong Kong SAR	Germany	39475520
China, Hong Kong SAR	Germany	103649
China, Hong Kong SAR	Greece	27551
China, Hong Kong SAR	India	1334249
China, Hong Kong SAR	Italy	300071
China, Hong Kong SAR	Italy	35929
China, Hong Kong SAR	Japan	410297435
China, Hong Kong SAR	Japan	2194056
China, Hong Kong SAR	Malaysia	59412
China, Hong Kong SAR	Netherlands	619316
China, Hong Kong SAR	Other Asia, nes	627355
China, Hong Kong SAR	Other Asia, nes	1456937
China, Hong Kong SAR	Philippines	7617
China, Hong Kong SAR	Poland	47313
China, Hong Kong SAR	Rep. of Korea	2352307
China, Hong Kong SAR	Russian Federation	31116561
China, Hong Kong SAR	Singapore	617140
China, Hong Kong SAR	Singapore	4436988
China, Hong Kong SAR	South Africa	477248631
China, Hong Kong SAR	Spain	3860
China, Hong Kong SAR	Sweden	34641
China, Hong Kong SAR	Switzerland	899466395
China, Hong Kong SAR	Switzerland	3232751
China, Hong Kong SAR	Thailand	120323
China, Hong Kong SAR	Thailand	98742
China, Hong Kong SAR	United Arab Emirates	249794
China, Hong Kong SAR	United Arab Emirates	162883
China, Hong Kong SAR	United Kingdom	508163433
China, Hong Kong SAR	United Kingdom	90153
China, Hong Kong SAR	USA	35223589
China, Hong Kong SAR	USA	3239403
Colombia	China	43719
Colombia	India	115
Colombia	Italy	842
Colombia	Spain	11776
Colombia	United Kingdom	2868
Colombia	USA	9414
Colombia	USA	1796
Comoros	United Arab Emirates	771.543
Congo	France	5202
Costa Rica	China	89
Costa Rica	Spain	32218
Costa Rica	Switzerland	1889233
Costa Rica	USA	5964780
Costa Rica	USA	5597
Côte d'Ivoire	Areas, nes	110.65
Côte d'Ivoire	China	2180.46
Côte d'Ivoire	Mali	1058.8
Côte d'Ivoire	Poland	498.81
Croatia	Austria	567
Croatia	China	24783
Croatia	Denmark	17
Croatia	Germany	328719
Croatia	Germany	1412
Croatia	Italy	2290
Croatia	Thailand	7
Croatia	United Kingdom	3635
Cyprus	China	43361
Cyprus	Germany	12474
Cyprus	Greece	216
Cyprus	Greece	97505
Cyprus	Israel	207
Cyprus	Italy	10581
Cyprus	Lebanon	16176
Cyprus	Spain	5396
Cyprus	United Kingdom	1100
Cyprus	United Kingdom	5037
Cyprus	USA	5851
Cyprus	USA	185
Czechia	Australia	56
Czechia	Austria	374209
Czechia	Austria	4200
Czechia	Belgium	59144
Czechia	Bulgaria	6583
Czechia	Canada	1760
Czechia	China	356168
Czechia	China, Hong Kong SAR	15336
Czechia	Germany	8034625
Czechia	Germany	6578
Czechia	Hungary	6897
Czechia	India	1651
Czechia	Italy	251437
Czechia	Italy	8646
Czechia	Japan	3335
Czechia	Lithuania	36892
Czechia	Netherlands	1834151
Czechia	Poland	4908490
Czechia	Russian Federation	202487
Czechia	Slovakia	40803435
Czechia	Slovakia	24919
Czechia	Switzerland	136656
Czechia	Thailand	1253
Czechia	United Kingdom	629000
Czechia	United Kingdom	122359
Czechia	USA	524991
Czechia	USA	1891
Denmark	Australia	8439
Denmark	Austria	27357
Denmark	Austria	3385
Denmark	Belgium	34941
Denmark	Belgium	1523
Denmark	Bulgaria	5490
Denmark	China	104260
Denmark	China, Hong Kong SAR	23536
Denmark	Czechia	36140
Denmark	Czechia	25
Denmark	Estonia	2736
Denmark	Eswatini	19533
Denmark	Fiji	2565
Denmark	Finland	13133
Denmark	Finland	1714
Denmark	France	24025
Denmark	France	3703
Denmark	French Polynesia	141412
Denmark	Germany	2370873
Denmark	Germany	664949
Denmark	Greece	8562
Denmark	Greenland	237
Denmark	Hungary	53567
Denmark	India	1792
Denmark	Indonesia	37986
Denmark	Ireland	1734743
Denmark	Italy	13055
Denmark	Italy	1631
Denmark	Japan	66699
Denmark	Japan	35353
Denmark	Latvia	1056
Denmark	Lithuania	21602
Denmark	Lithuania	310
Denmark	Luxembourg	36977
Denmark	Malta	1103
Denmark	Netherlands	1838243
Denmark	Netherlands	657
Denmark	Norway	35296
Denmark	Pakistan	2381
Denmark	Poland	177016
Denmark	Poland	12
Denmark	Portugal	1366
Denmark	Romania	1747
Denmark	Slovakia	6318
Denmark	Slovenia	144
Denmark	Spain	7535
Denmark	Spain	249
Denmark	Sweden	1826
Denmark	Sweden	18112
Denmark	Switzerland	1606722
Denmark	Thailand	1261
Denmark	United Kingdom	970224
Denmark	United Kingdom	34346
Denmark	USA	1300503
Denmark	USA	3389
Dominica	USA	970
Dominican Rep.	Areas, nes	397
Dominican Rep.	Spain	3558
Dominican Rep.	USA	1468986
Dominican Rep.	USA	2
Ecuador	India	107
Ecuador	Spain	14954
Ecuador	USA	4123
Ecuador	USA	6170
Egypt	Germany	300
Egypt	Syria	1772
El Salvador	China	372.85
El Salvador	Italy	265.16
El Salvador	Spain	1700.01
El Salvador	Thailand	411.73
El Salvador	USA	1205.27
Estonia	China	92621
Estonia	France	10091
Estonia	Germany	4412
Estonia	Germany	11713
Estonia	Other Europe, nes	5759
Estonia	Russian Federation	85
Estonia	USA	7066
Estonia	USA	67
Eswatini	South Africa	623.85
Eswatini	South Africa	29.067
Ethiopia	China	318.053
Ethiopia	South Africa	205.022
Ethiopia	United Kingdom	8837.55
Fiji	Australia	1075
Fiji	Cook Isds	1296
Fiji	New Zealand	34
Finland	Australia	7820
Finland	Bulgaria	79890
Finland	China	303869
Finland	China, Hong Kong SAR	39825
Finland	Denmark	6445
Finland	Estonia	42925
Finland	France	178284
Finland	France	5140
Finland	Germany	175622
Finland	Germany	29378
Finland	Hungary	765
Finland	India	30
Finland	Italy	5711
Finland	Norway	475032
Finland	Other Asia, nes	2444
Finland	Sweden	529786
Finland	Sweden	8114
Finland	Switzerland	619267
Finland	Switzerland	6368
Finland	Thailand	17739
Finland	United Kingdom	288866
Finland	USA	67106
Finland	USA	1044
France	Areas, nes	3800
France	Areas, nes	648
France	Australia	580
France	Australia	56528
France	Austria	293121
France	Belgium	535892
France	Belgium	95
France	Canada	50311
France	China	28116
France	China	1860757
France	China, Hong Kong SAR	104
France	China, Hong Kong SAR	136783
France	Czechia	274399
France	Czechia	33
France	Denmark	278821
France	France	88718
France	France	195
France	French Polynesia	216
France	French Polynesia	57062
France	Germany	75813912
France	Germany	29226
France	Hungary	8673
France	India	2237
France	Indonesia	635
France	Italy	19707131
France	Italy	88049
France	Japan	2224445
France	Japan	65988
France	Luxembourg	3760
France	Malta	259968
France	Netherlands	3352
France	Netherlands	3252
France	New Caledonia	3476
France	Philippines	86726
France	Poland	11444
France	Rep. of Korea	397
France	Romania	44817
France	Spain	14140734
France	Spain	154602
France	Sweden	45
France	Switzerland	27483776
France	Switzerland	78332
France	Thailand	145
France	Thailand	79299
France	Türkiye	188
France	United Kingdom	29040349
France	United Kingdom	64589
France	USA	35272133
France	USA	248055
French Polynesia	France	859
French Polynesia	French Polynesia	13374
FS Micronesia	Guam	5164
FS Micronesia	USA	1334
Gabon	France	1763.44
Gabon	Gambia	7.656
Gabon	USA	21070.2
Georgia	China, Hong Kong SAR	66
Georgia	France	221
Georgia	Germany	9996
Georgia	Türkiye	1123
Germany	Australia	15602.9
Germany	Australia	23528.4
Germany	Austria	9.90991e+07
Germany	Austria	6718.36
Germany	Belgium	5.75826e+08
Germany	Belgium	1492.54
Germany	Brazil	703919
Germany	Bulgaria	500521
Germany	Canada	33870.7
Germany	Canada	591.359
Germany	China	1.77405e+06
Germany	China	1.26933e+07
Germany	China, Hong Kong SAR	2518.42
Germany	China, Hong Kong SAR	748207
Germany	Croatia	893708
Germany	Cyprus	6.1248e+06
Germany	Czechia	7.90718e+07
Germany	Denmark	73759.2
Germany	Denmark	40038.9
Germany	Estonia	217205
Germany	Fiji	161.981
Germany	Finland	54479.6
Germany	Finland	500.084
Germany	France	4.89299e+07
Germany	France	75511.4
Germany	French Polynesia	39573.5
Germany	Hungary	168577
Germany	India	1478.4
Germany	India	11269.3
Germany	Indonesia	7.713
Germany	Iran	110.558
Germany	Ireland	1.09734e+06
Germany	Israel	18598.2
Germany	Italy	4.01606e+07
Germany	Italy	26936.4
Germany	Japan	3.58999e+07
Germany	Japan	463844
Germany	Kazakhstan	9641.73
Germany	Lebanon	3994.25
Germany	Lithuania	275846
Germany	Luxembourg	1.7758e+06
Germany	Malaysia	110.558
Germany	Netherlands	3.82737e+07
Germany	Netherlands	127270
Germany	New Zealand	949494
Germany	New Zealand	285.395
Germany	Norway	2.05339e+07
Germany	Norway	9997.83
Germany	Other Asia, nes	205077
Germany	Other Asia, nes	6349.4
Germany	Poland	1.07745e+07
Germany	Portugal	122908
Germany	Qatar	107.987
Germany	Rep. of Korea	1.31063e+06
Germany	Rep. of Korea	232.687
Germany	Romania	127545
Germany	Russian Federation	4.39299e+08
Germany	Singapore	506006
Germany	Slovakia	1.5775e+06
Germany	Slovenia	106784
Germany	South Africa	6.45555e+08
Germany	South Africa	186.407
Germany	Spain	881895
Germany	Spain	1942.49
Germany	Sri Lanka	1.56284e+06
Germany	Sweden	887786
Germany	Sweden	176.122
Germany	Switzerland	2.11108e+08
Germany	Switzerland	13642.4
Germany	Thailand	112606
Germany	Thailand	36495.9
Germany	Türkiye	54948.8
Germany	Türkiye	10450.3
Germany	Ukraine	6.9095e+06
Germany	United Arab Emirates	497689
Germany	United Arab Emirates	227.545
Germany	United Kingdom	3.2627e+08
Germany	United Kingdom	37841.9
Germany	USA	3.51877e+08
Germany	USA	75728.7
Ghana	Belgium	1702
Ghana	Italy	17
Ghana	Norway	29
Greece	Austria	7881
Greece	China	38170
Greece	China, Hong Kong SAR	54819
Greece	Cyprus	247
Greece	Cyprus	123215
Greece	Germany	177076
Greece	Germany	5974
Greece	Italy	52690
Greece	Italy	582
Greece	Netherlands	1332
Greece	Romania	95
Greece	Switzerland	35565
Greece	United Kingdom	2671
Greece	United Kingdom	14797
Greece	USA	13475
Greenland	Denmark	67.57
Guatemala	Mexico	50
Guatemala	Spain	722
Guatemala	USA	57849
Guatemala	USA	3564
Honduras	China	1168
Honduras	Spain	32
Honduras	Spain	428
Honduras	USA	941
Honduras	USA	751
Hungary	Austria	156088
Hungary	Austria	67953
Hungary	China	8646
Hungary	China, Hong Kong SAR	41429
Hungary	Germany	546290
Hungary	Germany	27562
Hungary	India	236
Hungary	Israel	16101
Hungary	Italy	1177
Hungary	Slovakia	3882394
Hungary	Switzerland	55642
Hungary	United Kingdom	2749
Hungary	USA	10212
Hungary	USA	1219
Iceland	China	3194
Iceland	Denmark	1782
Iceland	Denmark	133
Iceland	France	295
Iceland	Germany	61764
Iceland	Germany	346
Iceland	Italy	3901
Iceland	Netherlands	1661
Iceland	Sweden	124
Iceland	USA	77630
India	Australia	13534
India	Bangladesh	715452
India	Belgium	3320686
India	Brazil	49158
India	China	8079514
India	China	24006
India	China, Hong Kong SAR	263120
India	Czechia	51775
India	Denmark	794527
India	Egypt	602921
India	France	65
India	Germany	20398169
India	Indonesia	67
India	Ireland	4320
India	Italy	12423622
India	Japan	41498165
India	Malaysia	810751
India	Netherlands	1696748
India	Norway	1765229
India	Other Asia, nes	312227
India	Pakistan	279820
India	Rep. of Korea	485543
India	Russian Federation	4390601
India	Singapore	1391941
India	South Africa	18567119
India	Sri Lanka	13859
India	Sweden	6482
India	Switzerland	1275525
India	Thailand	250670
India	United Arab Emirates	125087
India	United Kingdom	97079444
India	USA	17216126
Indonesia	Austria	1160
Indonesia	China	1619
Indonesia	China, Hong Kong SAR	185944
Indonesia	China, Hong Kong SAR	1037
Indonesia	Germany	2113
Indonesia	Japan	172880
Indonesia	Rep. of Korea	32871
Indonesia	Singapore	197866
Indonesia	USA	1516
Ireland	Areas, nes	39731.8
Ireland	Areas, nes	2123.76
Ireland	Australia	2413.01
Ireland	Belgium	1.05343e+06
Ireland	China	52.708
Ireland	China	15522
Ireland	Germany	3.89233e+07
Ireland	Germany	25831
Ireland	India	182.551
Ireland	India	388.242
Ireland	Israel	362.531
Ireland	Italy	21906.1
Ireland	Netherlands	935120
Ireland	Russian Federation	1.28891e+07
Ireland	South Africa	6.38049e+06
Ireland	Switzerland	1667.38
Ireland	Thailand	93931.5
Ireland	United Kingdom	2.55583e+07
Ireland	United Kingdom	245971
Ireland	USA	9.57862e+06
Ireland	USA	48337.4
Ireland	Viet Nam	16815.3
Israel	Australia	1000
Israel	Cameroon	1000
Israel	China	4000
Israel	China	57000
Israel	China, Hong Kong SAR	54000
Israel	Czechia	35000
Israel	Germany	781000
Israel	India	15000
Israel	Ireland	1000
Israel	Italy	28000
Israel	Italy	1000
Israel	Spain	2000
Israel	Switzerland	1071000
Israel	United Kingdom	626000
Israel	USA	3239000
Italy	Australia	1178591
Italy	Austria	2244986
Italy	Belgium	22696449
Italy	Bulgaria	410196
Italy	China	47580
Italy	China	1397185
Italy	China, Hong Kong SAR	82069
Italy	Czechia	13686485
Italy	Egypt	110632
Italy	Finland	35852
Italy	France	2578222
Italy	France	1796
Italy	French Polynesia	9793
Italy	Germany	27449002
Italy	Germany	545813
Italy	Greece	30210
Italy	Hungary	1437614
Italy	India	6709
Italy	Indonesia	8017
Italy	Israel	171721
Italy	Japan	388963
Italy	Japan	273211
Italy	Luxembourg	19156
Italy	Netherlands	1665954
Italy	Netherlands	6611
Italy	Norway	20284971
Italy	Poland	1266
Italy	Portugal	95003
Italy	Rep. of Korea	16534974
Italy	Romania	205105
Italy	Russian Federation	36766341
Italy	Slovakia	239
Italy	Slovenia	36084
Italy	South Africa	179826740
Italy	Spain	12745
Italy	Spain	19854
Italy	Sweden	162
Italy	Switzerland	64296414
Italy	Switzerland	21672
Italy	Thailand	13706
Italy	Türkiye	25402
Italy	United Kingdom	54216122
Italy	United Kingdom	73174
Italy	USA	56657916
Italy	USA	26723
Italy	Viet Nam	162693
Jamaica	China	3759
Jamaica	Japan	918
Jamaica	Spain	12010
Jamaica	Switzerland	10181
Jamaica	USA	790
Jamaica	USA	68267
Japan	Australia	3635
Japan	Australia	16753883
Japan	Austria	2720
Japan	Belgium	3928607
Japan	China	35240955
Japan	China	4430517
Japan	China, Hong Kong SAR	153018
Japan	China, Hong Kong SAR	5590978
Japan	Czechia	13976
Japan	France	4776
Japan	France	150775
Japan	French Polynesia	84092
Japan	Germany	85843386
Japan	Germany	51553
Japan	Greece	7220
Japan	India	10027
Japan	Indonesia	17272
Japan	Indonesia	237850
Japan	Italy	3600184
Japan	Italy	184943
Japan	Lebanon	2820
Japan	Malaysia	147629
Japan	Malaysia	4588
Japan	Norway	67873791
Japan	Other Africa, nes	82338
Japan	Other Asia, nes	22503583
Japan	Other Asia, nes	44559
Japan	Philippines	1637240
Japan	Philippines	9501
Japan	Rep. of Korea	15556420
Japan	Rep. of Korea	72649
Japan	Russian Federation	516172655
Japan	Singapore	1119086
Japan	South Africa	2737549436
Japan	Switzerland	68691113
Japan	Switzerland	3861
Japan	Thailand	765306
Japan	Thailand	40624
Japan	United Kingdom	169913333
Japan	United Kingdom	8586
Japan	USA	284983075
Japan	USA	609906
Japan	Viet Nam	266065
Japan	Viet Nam	317807
Jordan	USA	3920
Kazakhstan	Belarus	960
Kazakhstan	China	2000
Kazakhstan	Italy	12300
Kazakhstan	Russian Federation	42670
Kazakhstan	Russian Federation	8230
Kazakhstan	Spain	300
Kazakhstan	USA	2200
Kyrgyzstan	Germany	589
Kyrgyzstan	Russian Federation	1021
Latvia	Austria	1344
Latvia	China	21369
Latvia	China	15243
Latvia	China, Hong Kong SAR	17612
Latvia	Estonia	1903
Latvia	Germany	2308119
Latvia	India	1655
Latvia	Lithuania	433
Latvia	Russian Federation	225527
Latvia	Spain	76997
Latvia	Thailand	6245
Latvia	United Arab Emirates	927
Latvia	United Kingdom	43435
Latvia	United Kingdom	91691
Latvia	USA	13604521
Latvia	USA	335
Lebanon	Areas, nes	164
Lebanon	China	20365
Lebanon	Germany	1138
Lebanon	Germany	35
Lebanon	Italy	23748
Lebanon	Japan	8325
Lebanon	Switzerland	555246
Lebanon	USA	47922
Lebanon	USA	552
Lithuania	Belgium	22524
Lithuania	China	14341
Lithuania	Estonia	1
Lithuania	France	5000
Lithuania	Germany	21035
Lithuania	Italy	1326173
Lithuania	Poland	34338
Lithuania	Russian Federation	245
Lithuania	United Kingdom	236
Lithuania	USA	1891
Luxembourg	Austria	3360
Luxembourg	Belgium	1429
Luxembourg	China	20837
Luxembourg	China, Hong Kong SAR	402
Luxembourg	France	69003
Luxembourg	France	9214
Luxembourg	French Polynesia	16955
Luxembourg	Germany	347301
Luxembourg	Germany	32901
Luxembourg	Netherlands	782
Luxembourg	Other Europe, nes	9223
Luxembourg	Other Europe, nes	12336
Luxembourg	Switzerland	383403
Madagascar	China	703.29
Madagascar	China, Hong Kong SAR	85.314
Madagascar	Japan	2662.81
Madagascar	USA	1100.83
Malawi	China	805.114
Malaysia	Australia	25612
Malaysia	Austria	7410
Malaysia	China	90031388
Malaysia	China	21133
Malaysia	China, Hong Kong SAR	298093
Malaysia	China, Hong Kong SAR	156226
Malaysia	Germany	880510
Malaysia	Germany	28288
Malaysia	India	106892
Malaysia	Italy	14825
Malaysia	Japan	29327618
Malaysia	Japan	43606
Malaysia	Other Asia, nes	1414538
Malaysia	Singapore	127108
Malaysia	Switzerland	1397047
Malaysia	Thailand	22881
Malaysia	United Kingdom	1422049
Malaysia	USA	14334705
Malaysia	USA	6116
Maldives	China	43
Maldives	Germany	1037
Maldives	Singapore	596
Maldives	Thailand	2586
Mali	China	567
Malta	China	9245
Malta	China, Hong Kong SAR	11438
Malta	Germany	46744
Malta	Germany	3451
Malta	Indonesia	179
Malta	Italy	1925
Malta	Japan	309
Malta	Switzerland	95
Malta	Thailand	133
Malta	United Kingdom	2592
Malta	United Kingdom	1892
Malta	USA	1688
Mauritius	China	2360
Mauritius	France	13848
Mauritius	France	11923
Mauritius	Italy	116776
Mauritius	Romania	15510
Mauritius	Switzerland	690
Mauritius	United Arab Emirates	225067
Mexico	Areas, nes	435
Mexico	Australia	1226
Mexico	Austria	17999
Mexico	Austria	243
Mexico	Belgium	80
Mexico	Brazil	1421
Mexico	Canada	528449
Mexico	China	333973
Mexico	China, Hong Kong SAR	51841
Mexico	France	29
Mexico	France	2743
Mexico	Germany	1066704
Mexico	India	3333
Mexico	Indonesia	2975
Mexico	Ireland	824
Mexico	Italy	905
Mexico	Italy	17551
Mexico	Japan	1015184
Mexico	Japan	34759
Mexico	Mauritius	264
Mexico	Netherlands	8929
Mexico	Other Asia, nes	214
Mexico	Spain	654650
Mexico	Switzerland	71548
Mexico	Thailand	4879
Mexico	Türkiye	140
Mexico	United Kingdom	2540697
Mexico	United Kingdom	2000
Mexico	USA	17444782
Mexico	USA	1311439
Mexico	Viet Nam	304
Montenegro	China	3925
Montenegro	South Africa	18
Morocco	Austria	1935
Morocco	China	14433
Morocco	France	219969
Morocco	India	732
Morocco	Italy	8932
Morocco	United Arab Emirates	195294
Morocco	United Kingdom	6287
Morocco	USA	66071
Mozambique	Portugal	120
Mozambique	Portugal	1260
Myanmar	China	4526
Namibia	Kenya	40
Namibia	South Africa	33702
Namibia	South Africa	38068
Namibia	United Rep. of Tanzania	1166
Nepal	China	4831
Nepal	India	3596
Nepal	India	228
Nepal	Switzerland	36
Netherlands	Australia	11511.8
Netherlands	Austria	420302
Netherlands	Belgium	1.53594e+06
Netherlands	Canada	6685.97
Netherlands	China	9654.23
Netherlands	China	300667
Netherlands	China, Hong Kong SAR	900375
Netherlands	China, Hong Kong SAR	27148.8
Netherlands	Colombia	34.709
Netherlands	Curaçao	494.924
Netherlands	Denmark	219148
Netherlands	Denmark	147041
Netherlands	France	673890
Netherlands	France	3995.39
Netherlands	French Polynesia	411.365
Netherlands	Germany	5.53744e+07
Netherlands	Germany	528574
Netherlands	India	293.098
Netherlands	Indonesia	3544.17
Netherlands	Japan	5499.44
Netherlands	Japan	3868.12
Netherlands	Other Asia, nes	12.855
Netherlands	Philippines	284.099
Netherlands	Poland	3949.11
Netherlands	Russian Federation	2.12813e+06
Netherlands	Switzerland	1.89465e+06
Netherlands	Switzerland	2972.11
Netherlands	Thailand	1491.2
Netherlands	Türkiye	107.983
Netherlands	United Arab Emirates	927482
Netherlands	United Kingdom	1.55192e+06
Netherlands	USA	2.37838e+06
Netherlands	USA	2760
New Caledonia	China	12555
New Caledonia	China, Hong Kong SAR	11956
New Caledonia	France	358
New Caledonia	France	4401
New Caledonia	French Polynesia	76367
New Caledonia	Indonesia	427
New Caledonia	Thailand	931
New Caledonia	USA	797
New Zealand	Australia	38410.3
New Zealand	Australia	163424
New Zealand	Belgium	1535.21
New Zealand	Canada	460.969
New Zealand	China	123683
New Zealand	China, Hong Kong SAR	1817.95
New Zealand	China, Hong Kong SAR	2170.36
New Zealand	French Polynesia	8175.11
New Zealand	Germany	519189
New Zealand	Honduras	63.191
New Zealand	India	1574.1
New Zealand	Ireland	388.867
New Zealand	Israel	120.711
New Zealand	Italy	12810.7
New Zealand	Japan	2.84105e+06
New Zealand	Japan	26224.2
New Zealand	Malaysia	1291.36
New Zealand	Other Asia, nes	25.114
New Zealand	Philippines	469.07
New Zealand	South Africa	4014.24
New Zealand	Switzerland	42649.8
New Zealand	Switzerland	430.994
New Zealand	Thailand	14787.5
New Zealand	Thailand	12181.2
New Zealand	United Kingdom	2785.26
New Zealand	United Kingdom	687.808
New Zealand	USA	1.55805e+06
New Zealand	USA	9652.81
Nicaragua	USA	58
Niger	France	349
Niger	Italy	70
Niger	Nigeria	107
Nigeria	China	28345
Nigeria	China	19934
Nigeria	Germany	2552
North Macedonia	China	902
North Macedonia	Italy	2429
North Macedonia	Japan	19808
North Macedonia	United Kingdom	406777442
Norway	Andorra	2785
Norway	Australia	2318
Norway	China	1554
Norway	China	333287
Norway	China, Hong Kong SAR	288
Norway	Czechia	12541
Norway	Denmark	113375
Norway	Denmark	7194
Norway	France	31896
Norway	France	1224
Norway	French Polynesia	5739
Norway	Germany	6696685
Norway	Germany	143365
Norway	Israel	441
Norway	Italy	144671
Norway	Japan	488
Norway	Kenya	173
Norway	Netherlands	33911
Norway	New Zealand	39143
Norway	Romania	501
Norway	Sweden	5518
Norway	Sweden	15441
Norway	Switzerland	219593
Norway	Switzerland	271
Norway	Thailand	432
Norway	Türkiye	2766
Norway	United Kingdom	2459873
Norway	United Kingdom	672
Norway	USA	3778909
Norway	USA	3334
Oman	China	211
Oman	Japan	40367
Oman	United Arab Emirates	25925
Oman	United Arab Emirates	1081012
Oman	United Kingdom	1547
Oman	USA	515
Other Asia, nes	Australia	34040
Other Asia, nes	Austria	27320
Other Asia, nes	Belgium	101
Other Asia, nes	China	146427
Other Asia, nes	China	1660741
Other Asia, nes	China, Hong Kong SAR	3241751
Other Asia, nes	China, Hong Kong SAR	382850
Other Asia, nes	France	135
Other Asia, nes	French Polynesia	2600
Other Asia, nes	Germany	38499928
Other Asia, nes	Greece	10975
Other Asia, nes	India	1925
Other Asia, nes	Indonesia	41064
Other Asia, nes	Italy	62643
Other Asia, nes	Italy	11347
Other Asia, nes	Japan	126475877
Other Asia, nes	Japan	638422
Other Asia, nes	Malaysia	28840
Other Asia, nes	Rep. of Korea	1534982
Other Asia, nes	Rep. of Korea	642
Other Asia, nes	Russian Federation	205187
Other Asia, nes	Singapore	1921851
Other Asia, nes	South Africa	1454744
Other Asia, nes	Spain	34
Other Asia, nes	Spain	439
Other Asia, nes	Switzerland	11578889
Other Asia, nes	United Kingdom	6479382
Other Asia, nes	USA	36273032
Other Asia, nes	USA	45150
Pakistan	Canada	14738
Pakistan	Germany	2008
Pakistan	Iran	18572
Pakistan	Switzerland	3572
Pakistan	United Kingdom	104312
Pakistan	USA	30597
Palau	Japan	285
Palau	Philippines	16
Palau	USA	81
Panama	Switzerland	29216
Panama	USA	33612
Panama	USA	19580
Peru	China	37819.3
Peru	Japan	183.94
Peru	Spain	6790.35
Peru	Spain	10398.9
Peru	USA	12506.8
Peru	USA	6983.54
Philippines	China, Hong Kong SAR	585
Philippines	Rep. of Korea	541190
Philippines	Singapore	1746
Philippines	USA	5699
Poland	Australia	7316
Poland	Canada	3195
Poland	China	1922
Poland	China	532723
Poland	China, Hong Kong SAR	280663
Poland	Cook Isds	2041
Poland	Czechia	545188
Poland	Denmark	127751
Poland	France	368206
Poland	Germany	10486713
Poland	Germany	7461
Poland	India	103
Poland	Ireland	539607
Poland	Italy	6220
Poland	Italy	1095
Poland	Japan	1316
Poland	Netherlands	6506
Poland	Philippines	3802
Poland	Slovakia	25368561
Poland	Spain	24973
Poland	Switzerland	208160
Poland	Thailand	7463
Poland	United Kingdom	4937921
Poland	United Kingdom	23519
Poland	USA	2630517
Poland	USA	1064
Portugal	Austria	92716
Portugal	Austria	2345
Portugal	Belgium	47193
Portugal	China	28738
Portugal	China, Hong Kong SAR	21111
Portugal	France	8604
Portugal	France	59
Portugal	Germany	5445913
Portugal	Germany	1724
Portugal	Italy	2264145
Portugal	Italy	1931
Portugal	Spain	154949
Portugal	Spain	35963
Portugal	Sweden	1752
Portugal	Switzerland	1851
Portugal	United Kingdom	928752
Portugal	United Kingdom	28027
Portugal	USA	5060
Portugal	USA	405
Qatar	China	17508.9
Qatar	China	555363
Qatar	France	112077
Qatar	Germany	641924
Qatar	India	86028.8
Qatar	Italy	49604.5
Qatar	Japan	192760
Qatar	Lebanon	19560.4
Qatar	Morocco	16739
Qatar	Pakistan	13897.9
Qatar	Rep. of Korea	57425.8
Qatar	Switzerland	48824.2
Qatar	Switzerland	65933.9
Qatar	United Arab Emirates	28158.6
Rep. of Korea	Areas, nes	2662
Rep. of Korea	Australia	54954
Rep. of Korea	Australia	95599
Rep. of Korea	Austria	3512
Rep. of Korea	Belgium	218364
Rep. of Korea	Canada	1361
Rep. of Korea	Canada	436
Rep. of Korea	China	87543
Rep. of Korea	China	399963
Rep. of Korea	China, Hong Kong SAR	45654
Rep. of Korea	China, Hong Kong SAR	73033
Rep. of Korea	Germany	72846877
Rep. of Korea	India	903
Rep. of Korea	India	129
Rep. of Korea	Indonesia	67551
Rep. of Korea	Indonesia	6561
Rep. of Korea	Italy	18774416
Rep. of Korea	Italy	331
Rep. of Korea	Japan	44599574
Rep. of Korea	Japan	803391
Rep. of Korea	Malaysia	34462
Rep. of Korea	Malaysia	1266
Rep. of Korea	Norway	13699518
Rep. of Korea	Other Asia, nes	301700
Rep. of Korea	Philippines	2410
Rep. of Korea	Russian Federation	7657835
Rep. of Korea	Singapore	4502
Rep. of Korea	South Africa	274504739
Rep. of Korea	Spain	133034
Rep. of Korea	Switzerland	6137803
Rep. of Korea	Thailand	253
Rep. of Korea	United Kingdom	135093967
Rep. of Korea	United Kingdom	1434
Rep. of Korea	USA	84888672
Rep. of Korea	USA	23872
Rep. of Moldova	Russian Federation	56
Rep. of Moldova	Türkiye	272
Rep. of Moldova	USA	352
Russian Federation	Belarus	765562
Russian Federation	Belarus	18420
Russian Federation	Belgium	322100
Russian Federation	China	416475
Russian Federation	Denmark	7683
Russian Federation	France	1810
Russian Federation	Germany	598709
Russian Federation	Germany	16191
Russian Federation	Greece	118
Russian Federation	India	165
Russian Federation	Italy	11674
Russian Federation	Italy	35028
Russian Federation	Japan	16019
Russian Federation	Kazakhstan	68887
Russian Federation	Malaysia	18067
Russian Federation	Mexico	547
Russian Federation	Other Asia, nes	226
Russian Federation	Rep. of Korea	233
Russian Federation	Spain	36
Russian Federation	Switzerland	11131
Russian Federation	Thailand	41
Russian Federation	Ukraine	547467
Russian Federation	United Kingdom	38862
Russian Federation	United Kingdom	12041
Russian Federation	USA	99357
Russian Federation	USA	38811
Rwanda	Belgium	11523.5
Rwanda	China	215.587
Saint Kitts and Nevis	USA	1003
Saint Lucia	China	703
Saint Lucia	USA	6853
Saint Vincent and the Grenadines	Trinidad and Tobago	113
Saint Vincent and the Grenadines	USA	53
Samoa	New Zealand	2119
Saudi Arabia	China	48800
Saudi Arabia	Germany	90400
Saudi Arabia	Germany	36000
Saudi Arabia	India	49333
Saudi Arabia	Italy	112800
Saudi Arabia	Russian Federation	28800
Saudi Arabia	Switzerland	2855737
Saudi Arabia	Thailand	38667
Saudi Arabia	United Arab Emirates	30133
Saudi Arabia	USA	159467
Saudi Arabia	USA	115467
Senegal	China	4013
Senegal	Lebanon	35562
Senegal	United Arab Emirates	2091
Serbia	Austria	3088
Serbia	China	17074
Serbia	Germany	1174428
Serbia	Hungary	286
Serbia	Slovenia	3832
Serbia	Spain	7277
Serbia	Switzerland	857
Serbia	United Kingdom	69
Seychelles	China, Hong Kong SAR	42824.9
Singapore	Australia	3127.05
Singapore	Australia	510773
Singapore	Austria	2125.24
Singapore	Belgium	2.69482e+06
Singapore	Canada	2126.85
Singapore	Canada	584.923
Singapore	China	394045
Singapore	China	124549
Singapore	China, Hong Kong SAR	1.31327e+06
Singapore	China, Hong Kong SAR	512440
Singapore	Czechia	785.765
Singapore	France	258485
Singapore	France	2.8349e+06
Singapore	French Polynesia	92134.5
Singapore	Germany	5.40799e+07
Singapore	Germany	1323.48
Singapore	India	242.451
Singapore	Indonesia	667.34
Singapore	Indonesia	269854
Singapore	Italy	112691
Singapore	Italy	1951.61
Singapore	Japan	7.37183e+07
Singapore	Japan	1.63207e+06
Singapore	Malaysia	192159
Singapore	Malaysia	74927.7
Singapore	Netherlands	4044.85
Singapore	Other Asia, nes	5.18256e+06
Singapore	Philippines	31676.2
Singapore	Rep. of Korea	745927
Singapore	Russian Federation	714.55
Singapore	Spain	198.442
Singapore	Sweden	24441.9
Singapore	Switzerland	51075.5
Singapore	Switzerland	5540.36
Singapore	Thailand	194273
Singapore	United Kingdom	160642
Singapore	United Kingdom	217907
Singapore	United States Minor Outlying Islands	607.327
Singapore	USA	7.6748e+07
Singapore	USA	76164.8
Slovakia	Areas, nes	423.98
Slovakia	Austria	101177
Slovakia	China	41151.8
Slovakia	Czechia	3.74289e+06
Slovakia	Czechia	13215.3
Slovakia	Denmark	40686.7
Slovakia	France	889.074
Slovakia	France	3251.8
Slovakia	Germany	6450.93
Slovakia	Germany	6019.24
Slovakia	Italy	216663
Slovakia	Other Europe, nes	4.81078e+07
Slovakia	Other Europe, nes	11983.2
Slovakia	Poland	875265
Slovakia	Slovakia	1.44697e+07
Slovakia	Switzerland	1794.85
Slovakia	United Kingdom	8.88571e+07
Slovakia	United Kingdom	4137.02
Slovakia	USA	4586.7
Slovakia	USA	988.003
Slovenia	Australia	6049
Slovenia	Austria	629818
Slovenia	Austria	6562
Slovenia	Canada	1535
Slovenia	China	22688
Slovenia	Croatia	516
Slovenia	Czechia	72656
Slovenia	Germany	1370621
Slovenia	Germany	8251
Slovenia	Italy	1589
Slovenia	Italy	8855
Slovenia	Other Europe, nes	61034
Slovenia	Other Europe, nes	1104
Slovenia	Switzerland	20679
Slovenia	Thailand	257
Slovenia	United Kingdom	5161
Slovenia	USA	3645
Slovenia	USA	172
South Africa	Angola	2011.34
South Africa	Austria	420444
South Africa	Brazil	1601.35
South Africa	Canada	50973.6
South Africa	China	110072
South Africa	China, Hong Kong SAR	384.289
South Africa	China, Hong Kong SAR	6527.19
South Africa	Dem. Rep. of the Congo	399.758
South Africa	Denmark	283.558
South Africa	Germany	3.2686e+07
South Africa	Italy	2701.72
South Africa	Italy	115.835
South Africa	Japan	3007.81
South Africa	Namibia	1827.05
South Africa	Rep. of Korea	1544.34
South Africa	South Africa	6.04293e+06
South Africa	Switzerland	1.33491e+06
South Africa	Thailand	109411
South Africa	United Kingdom	4.89747e+06
South Africa	United Kingdom	260.05
South Africa	USA	184662
South Africa	USA	1137.88
Spain	Australia	21367.5
Spain	Austria	10660.6
Spain	Belgium	71840.8
Spain	Belgium	31.478
Spain	China	918353
Spain	China, Hong Kong SAR	293860
Spain	France	1.23197e+06
Spain	France	7211.89
Spain	French Polynesia	7240.96
Spain	Germany	662161
Spain	Germany	71808.4
Spain	Greece	2015.91
Spain	Ireland	1846.48
Spain	Italy	7.50328e+06
Spain	Italy	2962.01
Spain	Japan	86401.2
Spain	Netherlands	14414.7
Spain	Other Asia, nes	87895.1
Spain	Other Europe, nes	1602.16
Spain	Other Europe, nes	42812
Spain	Poland	22278.9
Spain	Poland	1528.75
Spain	Portugal	17850.5
Spain	Portugal	12079.1
Spain	Singapore	343.953
Spain	Sweden	927.113
Spain	Switzerland	1.70219e+06
Spain	Switzerland	5948.95
Spain	Thailand	762.742
Spain	United Arab Emirates	6236.39
Spain	United Kingdom	3.32469e+07
Spain	United Kingdom	17837.4
Spain	USA	1.49941e+06
Spain	USA	5099.2
Spain	Venezuela	943.945
Spain	Viet Nam	81.793
Sri Lanka	China, Hong Kong SAR	218060
Sri Lanka	Denmark	150
Sri Lanka	France	40485
Sri Lanka	India	63
Sri Lanka	Italy	9623
Sri Lanka	Other Asia, nes	212
Sri Lanka	Switzerland	626
Sri Lanka	USA	42682
Sudan	Egypt	504
Sweden	Australia	18015
Sweden	Austria	1.2547e+06
Sweden	Belgium	738.318
Sweden	China	878303
Sweden	China, Hong Kong SAR	106170
Sweden	Denmark	43708.4
Sweden	Denmark	19639.3
Sweden	Finland	12108.4
Sweden	France	65415
Sweden	Germany	1.77698e+06
Sweden	Germany	62461.7
Sweden	Greece	147.664
Sweden	India	147.664
Sweden	Indonesia	147.664
Sweden	Italy	99968.2
Sweden	Italy	9450.47
Sweden	Japan	20377.6
Sweden	Japan	25988.8
Sweden	Mexico	147.664
Sweden	Netherlands	1624.3
Sweden	Norway	1.87725e+06
Sweden	Norway	1033.64
Sweden	Other Asia, nes	1033.64
Sweden	Switzerland	1.24421e+06
Sweden	United Kingdom	744963
Sweden	United Kingdom	18900.9
Sweden	USA	666406
Sweden	USA	3100.93
Sweden	Viet Nam	885.982
Switzerland	Australia	203483
Switzerland	Australia	45823.7
Switzerland	Austria	206965
Switzerland	Austria	1.20422e+07
Switzerland	Bahamas	1.35948e+06
Switzerland	Belgium	1.78271e+06
Switzerland	Belgium	129678
Switzerland	Brazil	527.077
Switzerland	Canada	2.16349e+07
Switzerland	Chile	1.56998e+06
Switzerland	China	65593.4
Switzerland	China	502826
Switzerland	China, Hong Kong SAR	2.17541e+07
Switzerland	China, Hong Kong SAR	8.06402e+06
Switzerland	Costa Rica	69693.7
Switzerland	Czechia	1.76129e+07
Switzerland	Czechia	291.28
Switzerland	Denmark	16121.7
Switzerland	Denmark	13626.1
Switzerland	Estonia	2.27637e+07
Switzerland	France	2.89315e+07
Switzerland	France	2.04973e+06
Switzerland	Germany	3.85598e+08
Switzerland	Germany	1.74804e+06
Switzerland	Guinea	1760.48
Switzerland	Hungary	16385.3
Switzerland	India	1.32845e+06
Switzerland	India	124526
Switzerland	Indonesia	762.875
Switzerland	Israel	50120.3
Switzerland	Israel	357.431
Switzerland	Italy	1.83418e+08
Switzerland	Italy	2.5072e+06
Switzerland	Japan	3.815e+08
Switzerland	Japan	151519
Switzerland	Luxembourg	321583
Switzerland	Malaysia	326.489
Switzerland	Mexico	218428
Switzerland	Netherlands	1.69766e+06
Switzerland	Netherlands	10306.8
Switzerland	Other Asia, nes	7.52942e+06
Switzerland	Peru	22960.9
Switzerland	Portugal	19690.7
Switzerland	Rep. of Korea	242223
Switzerland	Russian Federation	1.37e+08
Switzerland	Saudi Arabia	33463
Switzerland	Serbia	438067
Switzerland	Singapore	129328
Switzerland	South Africa	8.4007e+08
Switzerland	Spain	680067
Switzerland	Spain	2867.98
Switzerland	Sweden	670491
Switzerland	Thailand	69.352
Switzerland	United Arab Emirates	4.49291e+06
Switzerland	United Arab Emirates	1.3207e+07
Switzerland	United Kingdom	1.4947e+08
Switzerland	United Kingdom	8.63444e+06
Switzerland	USA	4.15344e+08
Switzerland	USA	1.65352e+07
Switzerland	Viet Nam	765.009
Thailand	Australia	738
Thailand	Australia	4329134
Thailand	Austria	9260
Thailand	Canada	651
Thailand	China	121204
Thailand	China, Hong Kong SAR	2296933
Thailand	China, Hong Kong SAR	175768
Thailand	Eswatini	11378
Thailand	France	7708
Thailand	Germany	5560847
Thailand	Germany	6242
Thailand	India	23
Thailand	India	10116
Thailand	Italy	909546
Thailand	Japan	37767774
Thailand	Japan	323824
Thailand	Netherlands	43763
Thailand	New Zealand	50
Thailand	Other Asia, nes	913
Thailand	Pakistan	73
Thailand	Philippines	36100
Thailand	Rep. of Korea	114
Thailand	Singapore	2250
Thailand	Spain	189457
Thailand	Sweden	53
Thailand	Sweden	164
Thailand	Switzerland	122999
Thailand	Thailand	48418
Thailand	United Arab Emirates	42116
Thailand	United Kingdom	395307
Thailand	United Kingdom	7
Thailand	USA	5261125
Thailand	USA	2051
Togo	China	391.752
Tonga	New Zealand	397
Trinidad and Tobago	China, Hong Kong SAR	5974.76
Trinidad and Tobago	Italy	225.055
Trinidad and Tobago	USA	895.553
Trinidad and Tobago	USA	481.06
Tunisia	Areas, nes	2271
Tunisia	Austria	3424
Tunisia	China, Hong Kong SAR	641
Türkiye	Austria	1037170
Türkiye	China	131610
Türkiye	China, Hong Kong SAR	28379
Türkiye	China, Hong Kong SAR	7300
Türkiye	Denmark	1998
Türkiye	France	7690
Türkiye	France	197273
Türkiye	Georgia	127951
Türkiye	Germany	814411
Türkiye	Germany	281
Türkiye	India	850
Türkiye	Italy	206444
Türkiye	Italy	20551
Türkiye	Japan	8033
Türkiye	Slovakia	511824
Türkiye	Switzerland	228370
Türkiye	Thailand	3497
Türkiye	United Arab Emirates	210154
Türkiye	United Arab Emirates	2602
Türkiye	United Kingdom	11808
Türkiye	USA	1019288
Türkiye	USA	150
Türkiye	Viet Nam	1769
Uganda	Belgium	15695
Ukraine	China	81868
Ukraine	Czechia	356345
Ukraine	France	7859
Ukraine	Germany	1550762
Ukraine	Germany	17941
Ukraine	Italy	26866
Ukraine	Italy	2778
Ukraine	Japan	25287
Ukraine	Russian Federation	638579
Ukraine	Russian Federation	518
Ukraine	Switzerland	255244
Ukraine	United Kingdom	456144
Ukraine	USA	4448
Ukraine	USA	2340
United Arab Emirates	Australia	13523
United Arab Emirates	Austria	788
United Arab Emirates	Austria	817
United Arab Emirates	Bahrain	2028
United Arab Emirates	Canada	694
United Arab Emirates	China	18721
United Arab Emirates	China, Hong Kong SAR	741422
United Arab Emirates	China, Hong Kong SAR	37477
United Arab Emirates	France	61499
United Arab Emirates	Germany	51966
United Arab Emirates	Germany	20157
United Arab Emirates	India	23191
United Arab Emirates	Italy	898467
United Arab Emirates	Italy	1226
United Arab Emirates	Japan	14963680
United Arab Emirates	Jordan	147
United Arab Emirates	Kenya	1257
United Arab Emirates	Kuwait	1542
United Arab Emirates	Lebanon	2830
United Arab Emirates	Malaysia	30630
United Arab Emirates	Pakistan	12423
United Arab Emirates	Rep. of Korea	1211
United Arab Emirates	Saudi Arabia	6655
United Arab Emirates	Singapore	299262
United Arab Emirates	South Africa	4169611
United Arab Emirates	South Africa	13528
United Arab Emirates	Switzerland	9126973
United Arab Emirates	Syria	2074
United Arab Emirates	Thailand	27429
United Arab Emirates	Thailand	9272
United Arab Emirates	Türkiye	102201
United Arab Emirates	United Kingdom	92442
United Arab Emirates	United Kingdom	10739
United Arab Emirates	USA	726766
United Arab Emirates	USA	4702
United Kingdom	Australia	2020972
United Kingdom	Australia	26309
United Kingdom	Austria	1082600
United Kingdom	Belgium	221031822
United Kingdom	Brazil	533740
United Kingdom	Bulgaria	57827
United Kingdom	Canada	72341681
United Kingdom	Canada	5967
United Kingdom	China	9600184
United Kingdom	China	2973638
United Kingdom	China, Hong Kong SAR	3707
United Kingdom	China, Hong Kong SAR	388885
United Kingdom	Cyprus	583
United Kingdom	Czechia	3335951
United Kingdom	Czechia	5271
United Kingdom	Denmark	14506
United Kingdom	Dominican Rep.	4323
United Kingdom	Finland	1321528
United Kingdom	France	3029432
United Kingdom	France	88993
United Kingdom	Germany	142840616
United Kingdom	Germany	159725
United Kingdom	India	72898
United Kingdom	India	340220
United Kingdom	Indonesia	18989
United Kingdom	Ireland	20532724
United Kingdom	Ireland	1317
United Kingdom	Israel	88201
United Kingdom	Israel	14125
United Kingdom	Italy	130853725
United Kingdom	Italy	35434
United Kingdom	Japan	43831619
United Kingdom	Japan	2615704
United Kingdom	Mexico	29890
United Kingdom	Nepal	3018
United Kingdom	Netherlands	4858209
United Kingdom	Norway	98211967
United Kingdom	Pakistan	121512
United Kingdom	Philippines	9736
United Kingdom	Poland	43872
United Kingdom	Poland	2657
United Kingdom	Portugal	666
United Kingdom	Rep. of Korea	528571
United Kingdom	Russian Federation	173605173
United Kingdom	South Africa	602562166
United Kingdom	South Africa	11089
United Kingdom	Spain	4915211
United Kingdom	Spain	18999
United Kingdom	Sweden	2483
United Kingdom	Switzerland	2323275543
United Kingdom	Switzerland	30977
United Kingdom	Thailand	81526
United Kingdom	Thailand	292043
United Kingdom	Trinidad and Tobago	42409
United Kingdom	Ukraine	54870
United Kingdom	United Arab Emirates	41490
United Kingdom	United Arab Emirates	34506
United Kingdom	United Kingdom	695773
United Kingdom	United Kingdom	17236
United Kingdom	USA	81527986
United Kingdom	USA	405762
United Kingdom	Uzbekistan	465106
United Rep. of Tanzania	China	535
United Rep. of Tanzania	Germany	24407
United Rep. of Tanzania	India	73
United Rep. of Tanzania	South Africa	206
Uruguay	Brazil	3069
Uruguay	China	14366
Uruguay	China, Hong Kong SAR	1047
Uruguay	Germany	288
Uruguay	Netherlands	5171
Uruguay	Spain	25
Uruguay	Spain	4397
Uruguay	USA	133104
Uruguay	USA	236
USA	Argentina	318045
USA	Australia	23779753
USA	Australia	1468042
USA	Austria	2810341
USA	Austria	10754
USA	Bahrain	2650
USA	Belgium	137254475
USA	Brazil	18063325
USA	Canada	89057645
USA	Canada	867949
USA	Chile	27017
USA	China	11590197
USA	China	29634988
USA	China, Hong Kong SAR	904012
USA	Colombia	60043753
USA	Costa Rica	44853
USA	Czechia	2745304
USA	Denmark	36895
USA	France	3598691
USA	France	209300
USA	French Polynesia	476225
USA	Germany	366942423
USA	Germany	87927
USA	India	1980019
USA	India	35372
USA	Indonesia	137311
USA	Ireland	112095
USA	Israel	3479
USA	Israel	551283
USA	Italy	179630645
USA	Italy	161148
USA	Japan	52137480
USA	Japan	737765
USA	Mexico	2555383
USA	Mexico	56562
USA	Nepal	2191
USA	Netherlands	142527
USA	Netherlands	2674
USA	New Zealand	2122
USA	Nicaragua	4230
USA	Norway	197094540
USA	Other Asia, nes	4317
USA	Other Asia, nes	89845
USA	Panama	23704
USA	Peru	297322
USA	Philippines	62034
USA	Philippines	213849
USA	Poland	4712344
USA	Portugal	18379
USA	Rep. of Korea	64081623
USA	Rep. of Korea	4142
USA	Russian Federation	505195543
USA	Russian Federation	5116
USA	Saudi Arabia	2423811
USA	Singapore	22790744
USA	Slovakia	19711
USA	South Africa	1804087416
USA	Spain	88157
USA	Spain	239168
USA	Sweden	17940
USA	Switzerland	146426714
USA	Switzerland	104831
USA	Thailand	16268
USA	Thailand	448917
USA	Türkiye	98518
USA	Türkiye	30256
USA	United Kingdom	679697287
USA	United Kingdom	61748
USA	Viet Nam	179931
Venezuela	China	202301
Venezuela	China, Hong Kong SAR	14802
Venezuela	Spain	54
Venezuela	Spain	17206
Venezuela	USA	9412
Venezuela	USA	612
Viet Nam	Areas, nes	3438
Viet Nam	Australia	28033
Viet Nam	China	57765
Viet Nam	China, Hong Kong SAR	840729
Viet Nam	China, Hong Kong SAR	5119
Viet Nam	France	122552
Viet Nam	France	985
Viet Nam	Germany	3020
Viet Nam	Italy	28301
Viet Nam	Japan	6284343
Viet Nam	Japan	125207
Viet Nam	Thailand	1182
Viet Nam	United Kingdom	6194
Viet Nam	USA	163113
Zambia	South Africa	1439.88
Zimbabwe	China	276
Zimbabwe	Germany	12180.2
Zimbabwe	South Africa	37437.9
Zimbabwe	USA	4263.71

## Sheet: 2013
source	target	weight
Albania	Germany	9205
Albania	Italy	33470
Algeria	Austria	18938
Algeria	China	4028
Algeria	China	66462
Algeria	France	233728
Algeria	Germany	764
Algeria	Italy	15082
Algeria	Rep. of Korea	30
Algeria	USA	512
Andorra	Belgium	433.345
Andorra	Spain	3118.31
Andorra	Spain	33909.5
Andorra	Switzerland	15751.5
Angola	Congo	967
Angola	Germany	259
Angola	Italy	10
Angola	Namibia	83
Angola	Netherlands	23
Angola	Portugal	707
Angola	Portugal	905
Angola	South Africa	975
Angola	Spain	335
Angola	USA	3290
Antigua and Barbuda	China	59016
Antigua and Barbuda	USA	1261
Argentina	Austria	76530
Argentina	China	197
Argentina	Germany	27430
Argentina	Japan	154
Argentina	Norway	144203
Argentina	South Africa	2764201
Argentina	United Kingdom	57132201
Argentina	USA	2845896
Armenia	Canada	279
Armenia	Germany	3808
Armenia	United Arab Emirates	664
Aruba	Areas, nes	111933
Aruba	Curaçao	1588
Aruba	Netherlands	8104
Aruba	Spain	1537
Aruba	Switzerland	5300
Aruba	USA	8499
Aruba	USA	60759
Australia	Australia	121115
Australia	Australia	2336501
Australia	Austria	383450
Australia	Belgium	35930
Australia	Canada	5464
Australia	China	3394
Australia	China	3196356
Australia	China, Hong Kong SAR	2892046
Australia	China, Hong Kong SAR	1941457
Australia	Cook Isds	4037
Australia	Denmark	998
Australia	France	86569
Australia	Germany	7090938
Australia	Germany	5579
Australia	India	31928
Australia	India	2899
Australia	Indonesia	12413
Australia	Italy	914118
Australia	Italy	42066
Australia	Japan	1534452
Australia	Japan	124600
Australia	Mexico	1884
Australia	Netherlands	26032
Australia	Netherlands	41945
Australia	New Zealand	2310896
Australia	New Zealand	2294
Australia	Niger	17483
Australia	Other Asia, nes	4010
Australia	Philippines	6521
Australia	Portugal	2070
Australia	Saudi Arabia	10344
Australia	Singapore	2894
Australia	Singapore	1482
Australia	South Africa	84491870
Australia	Spain	15573
Australia	Spain	31753
Australia	Switzerland	6959491
Australia	Switzerland	49353
Australia	Thailand	3875
Australia	Thailand	138791
Australia	United Arab Emirates	75481
Australia	United Kingdom	7551958
Australia	United Kingdom	8970
Australia	USA	14782378
Australia	USA	404381
Australia	Viet Nam	1433
Australia	Viet Nam	8798
Austria	Australia	13642
Austria	Belgium	927941
Austria	Belgium	96
Austria	China	5795
Austria	China	1017932
Austria	China, Hong Kong SAR	55888
Austria	Czechia	164784
Austria	Czechia	9960
Austria	Denmark	3337
Austria	France	1150880
Austria	France	42012
Austria	French Polynesia	9394
Austria	Germany	59422968
Austria	Germany	1456937
Austria	Greece	84012
Austria	Guatemala	365
Austria	Hungary	202413
Austria	Italy	620987
Austria	Italy	163151
Austria	Japan	170407
Austria	Japan	1005
Austria	Latvia	2669
Austria	Netherlands	21877
Austria	Netherlands	2041
Austria	Poland	42436
Austria	Poland	412
Austria	Portugal	8779
Austria	Serbia	54
Austria	Singapore	851
Austria	Slovakia	186137
Austria	Slovakia	17737
Austria	Slovenia	297498
Austria	South Africa	131156
Austria	Spain	14577
Austria	Sweden	908301
Austria	Sweden	5312
Austria	Switzerland	2065096
Austria	Switzerland	28181
Austria	Thailand	2227061
Austria	Thailand	35182
Austria	Türkiye	68
Austria	United Kingdom	14937949
Austria	United Kingdom	16527
Austria	USA	648678
Austria	USA	26314
Azerbaijan	USA	2147
Bahamas	USA	7494
Bahamas	USA	123520
Bahrain	China	1822230
Bahrain	China	1809
Bahrain	China, Hong Kong SAR	1541592
Bahrain	India	30026
Bahrain	Italy	220
Bahrain	Thailand	109
Bahrain	Thailand	9981
Bahrain	Türkiye	477
Bahrain	United Kingdom	19004
Bahrain	United Kingdom	48
Bangladesh	Canada	5065
Bangladesh	USA	312
Barbados	China	27901
Barbados	China, Hong Kong SAR	1484
Barbados	Japan	482
Barbados	Other Asia, nes	1263
Barbados	Thailand	1023
Barbados	USA	3190
Barbados	USA	8663
Belgium	Australia	7330.9
Belgium	Austria	135456
Belgium	China	1343.33
Belgium	China	269132
Belgium	China, Hong Kong SAR	37175.5
Belgium	Cyprus	1.44512e+06
Belgium	Czechia	600839
Belgium	Czechia	5574.19
Belgium	Estonia	1.31271e+07
Belgium	France	2.56102e+06
Belgium	France	219870
Belgium	Germany	1.58981e+08
Belgium	Germany	18454.2
Belgium	Hungary	679.441
Belgium	India	1769.93
Belgium	Ireland	315.653
Belgium	Italy	388872
Belgium	Italy	858.76
Belgium	Japan	5364.68
Belgium	Japan	467.351
Belgium	Lithuania	466835
Belgium	Luxembourg	21131.7
Belgium	Morocco	11498.8
Belgium	Netherlands	1.4386e+06
Belgium	Netherlands	6201.59
Belgium	Poland	19595.6
Belgium	Portugal	262522
Belgium	Rep. of Korea	10998.8
Belgium	Rep. of Korea	6426.67
Belgium	Romania	7467.88
Belgium	South Africa	2132.25
Belgium	Spain	10940.3
Belgium	Switzerland	1.8054e+06
Belgium	United Arab Emirates	4.70189e+06
Belgium	United Kingdom	7.98875e+06
Belgium	USA	363546
Belgium	USA	2953.03
Belize	USA	16
Benin	Togo	122
Bermuda	USA	2628
Bermuda	USA	30
Bolivia (Plurinational State of)	China	223176
Bolivia (Plurinational State of)	China	11.49
Bolivia (Plurinational State of)	USA	42006
Bosnia Herzegovina	China	17318
Bosnia Herzegovina	Germany	535
Bosnia Herzegovina	Italy	181
Bosnia Herzegovina	Slovenia	689
Bosnia Herzegovina	Slovenia	1708
Bosnia Herzegovina	United Kingdom	36609
Botswana	South Africa	22887.8
Botswana	South Africa	5188.53
Brazil	Australia	8432
Brazil	Belgium	5280439
Brazil	China	3330
Brazil	China	41689
Brazil	China, Hong Kong SAR	20553
Brazil	Czechia	29
Brazil	France	6835
Brazil	France	382
Brazil	Germany	12538165
Brazil	Germany	1143
Brazil	Italy	7363160
Brazil	Japan	705
Brazil	Norway	29370357
Brazil	Russian Federation	92703482
Brazil	South Africa	41671945
Brazil	Spain	284
Brazil	United Kingdom	11783613
Brazil	USA	36123945
Brazil	USA	17500
Brunei Darussalam	Germany	1315
Brunei Darussalam	Japan	2534
Brunei Darussalam	Thailand	1504
Bulgaria	Austria	12957
Bulgaria	China	69085
Bulgaria	China, Hong Kong SAR	1687
Bulgaria	Germany	25670
Bulgaria	Germany	308
Bulgaria	India	3771
Bulgaria	Italy	36929
Bulgaria	USA	1436
Burkina Faso	Benin	141.688
Burkina Faso	China	7868.13
Burkina Faso	Mali	40.482
Cabo Verde	Portugal	31.199
Cameroon	France	66
Cameroon	United Arab Emirates	1419
Canada	Andorra	60
Canada	Australia	1725
Canada	Austria	31310
Canada	Belgium	19811616
Canada	Brazil	20
Canada	Canada	450351
Canada	Canada	11256
Canada	China	1835
Canada	China	1943147
Canada	China, Hong Kong SAR	81127
Canada	Cook Isds	5092
Canada	Czechia	19
Canada	Denmark	1134
Canada	France	487
Canada	France	14018
Canada	French Polynesia	3417
Canada	Germany	3290532
Canada	Germany	1999
Canada	Ghana	39
Canada	Greece	327
Canada	Honduras	11
Canada	India	46
Canada	India	12881
Canada	Indonesia	14349
Canada	Iran	116
Canada	Iraq	716
Canada	Israel	54458
Canada	Italy	3891803
Canada	Italy	21978
Canada	Japan	2472311
Canada	Japan	13865
Canada	Lebanon	698
Canada	Lithuania	358
Canada	Luxembourg	35
Canada	Netherlands	16968
Canada	Netherlands	310
Canada	Norway	3690887
Canada	Other Asia, nes	1797
Canada	Other Asia, nes	895
Canada	Pakistan	108
Canada	Peru	165
Canada	Philippines	1299
Canada	Rep. of Korea	259
Canada	Russian Federation	73250287
Canada	South Africa	18898581
Canada	South Africa	575
Canada	Spain	16852
Canada	Sweden	823
Canada	Switzerland	9247683
Canada	Switzerland	22
Canada	Thailand	67719
Canada	United Arab Emirates	100
Canada	United Kingdom	47305997
Canada	United Kingdom	32
Canada	USA	83149306
Canada	USA	2677155
Canada	Viet Nam	2405
Chile	Austria	4340.44
Chile	Brazil	3094.06
Chile	China	25817.9
Chile	Germany	1242.87
Chile	India	4308.43
Chile	Japan	1601.27
Chile	Spain	34873.2
Chile	Switzerland	13346.1
Chile	Thailand	294
Chile	United Kingdom	289.99
Chile	USA	11708.4
Chile	USA	11791.9
China	Areas, nes	106231465
China	Australia	4184529
China	Australia	280
China	Austria	680
China	Belgium	17079633
China	China	10846
China	China	141244
China	China, Hong Kong SAR	2479696
China	China, Hong Kong SAR	1355478
China	China, Macao SAR	2566
China	Costa Rica	7556
China	Czechia	760
China	Denmark	52
China	France	30808
China	France	2159
China	Germany	68839487
China	Germany	4329
China	Ireland	219618
China	Italy	6124398
China	Italy	87484
China	Japan	738283328
China	Japan	18871
China	Netherlands	28152
China	Norway	1038849
China	Other Asia, nes	14065162
China	Other Asia, nes	7160
China	Philippines	2299
China	Portugal	42013
China	Rep. of Korea	2401594
China	Rep. of Korea	5193
China	Russian Federation	506618040
China	Singapore	13385962
China	Singapore	1269
China	South Africa	2906465078
China	Spain	6254
China	Switzerland	337087065
China	Switzerland	99533
China	Thailand	30815
China	Thailand	619
China	United Kingdom	350716129
China	United Kingdom	1753
China	USA	120530448
China	USA	32470
China, Hong Kong SAR	Australia	67144
China, Hong Kong SAR	Austria	31588
China, Hong Kong SAR	Canada	91903
China, Hong Kong SAR	Canada	42768
China, Hong Kong SAR	China	8175418
China, Hong Kong SAR	China	8126850
China, Hong Kong SAR	China, Macao SAR	359573
China, Hong Kong SAR	Fiji	7013
China, Hong Kong SAR	France	69126
China, Hong Kong SAR	France	25252
China, Hong Kong SAR	Germany	14956921
China, Hong Kong SAR	Germany	18228
China, Hong Kong SAR	Greece	58970
China, Hong Kong SAR	India	543656
China, Hong Kong SAR	Italy	859812
China, Hong Kong SAR	Italy	232599
China, Hong Kong SAR	Japan	704635035
China, Hong Kong SAR	Japan	2343964
China, Hong Kong SAR	Malaysia	57694
China, Hong Kong SAR	Mexico	22351
China, Hong Kong SAR	Netherlands	130108
China, Hong Kong SAR	New Zealand	1887
China, Hong Kong SAR	Norway	14634
China, Hong Kong SAR	Oman	11227
China, Hong Kong SAR	Other Asia, nes	252987
China, Hong Kong SAR	Other Asia, nes	841393
China, Hong Kong SAR	Philippines	30533
China, Hong Kong SAR	Poland	1683
China, Hong Kong SAR	Rep. of Korea	2743991
China, Hong Kong SAR	Rep. of Korea	6739
China, Hong Kong SAR	Russian Federation	15532861
China, Hong Kong SAR	Singapore	486403
China, Hong Kong SAR	Singapore	214003
China, Hong Kong SAR	South Africa	144252429
China, Hong Kong SAR	Spain	14885
China, Hong Kong SAR	Sweden	18990
China, Hong Kong SAR	Switzerland	979468404
China, Hong Kong SAR	Switzerland	4608067
China, Hong Kong SAR	Thailand	71323978
China, Hong Kong SAR	Thailand	149800
China, Hong Kong SAR	United Arab Emirates	36449205
China, Hong Kong SAR	United Arab Emirates	3072123
China, Hong Kong SAR	United Kingdom	626260296
China, Hong Kong SAR	United Kingdom	4374724
China, Hong Kong SAR	USA	20784777
China, Hong Kong SAR	USA	2832089
Colombia	Canada	127557
Colombia	China	16924
Colombia	Italy	440
Colombia	Mexico	979
Colombia	Spain	5009
Colombia	United Kingdom	10259
Colombia	USA	19466
Colombia	USA	2778
Comoros	France	2317.3
Comoros	United Arab Emirates	54.063
Congo	China	1417
Costa Rica	China	20223
Costa Rica	China	4107
Costa Rica	Mexico	93
Costa Rica	Philippines	1100
Costa Rica	Spain	26170
Costa Rica	Sweden	126553
Costa Rica	Switzerland	280590
Costa Rica	USA	7561949
Costa Rica	USA	4936
Côte d'Ivoire	Areas, nes	210.952
Côte d'Ivoire	China	5858.84
Côte d'Ivoire	France	12543.7
Côte d'Ivoire	French Polynesia	2234.78
Côte d'Ivoire	Mali	1160.6
Côte d'Ivoire	Niger	304.135
Côte d'Ivoire	Thailand	6417.44
Croatia	Austria	30942
Croatia	Czechia	1657
Croatia	Denmark	666
Croatia	France	424
Croatia	Germany	7112028
Croatia	Germany	718
Croatia	India	2829
Croatia	Other Europe, nes	21
Croatia	Philippines	3424
Croatia	Slovenia	61255
Croatia	Slovenia	48968
Croatia	Türkiye	6615
Croatia	USA	139
Cyprus	Brazil	152.734
Cyprus	China	1512.73
Cyprus	Germany	13119.1
Cyprus	Greece	2523.42
Cyprus	Italy	25040.3
Cyprus	Italy	1155.46
Cyprus	Lebanon	15337.1
Cyprus	Spain	969.526
Cyprus	United Kingdom	687.965
Cyprus	USA	11392.6
Cyprus	USA	54.453
Czechia	Australia	702
Czechia	Austria	415080
Czechia	Austria	4155
Czechia	China	524
Czechia	China	186614
Czechia	China, Hong Kong SAR	14025
Czechia	Denmark	583
Czechia	Estonia	713
Czechia	France	7954
Czechia	Germany	4854062
Czechia	Germany	1950
Czechia	Hungary	122
Czechia	Indonesia	29
Czechia	Israel	150
Czechia	Italy	9904
Czechia	Italy	4612
Czechia	Other Asia, nes	1035
Czechia	Poland	4924835
Czechia	Russian Federation	23020
Czechia	Slovakia	57743685
Czechia	Slovakia	20929
Czechia	Slovenia	252377
Czechia	Spain	370
Czechia	Switzerland	689837
Czechia	Switzerland	9002
Czechia	Ukraine	103970
Czechia	United Kingdom	1090067
Czechia	United Kingdom	62889
Czechia	USA	399288
Czechia	USA	34346
Denmark	Australia	260
Denmark	Australia	7889
Denmark	Austria	18328
Denmark	Belgium	3447
Denmark	Bulgaria	6968
Denmark	Bulgaria	16
Denmark	China	2250
Denmark	China	90647
Denmark	China, Hong Kong SAR	7323
Denmark	Czechia	3118
Denmark	Czechia	81
Denmark	Finland	4210
Denmark	Finland	3601
Denmark	France	17648
Denmark	France	6960
Denmark	French Polynesia	239247
Denmark	Germany	3722940
Denmark	Germany	688938
Denmark	Ghana	4277
Denmark	Greece	3776
Denmark	Greece	1310
Denmark	Hungary	1198
Denmark	India	276
Denmark	Indonesia	24877
Denmark	Ireland	690680
Denmark	Italy	48996
Denmark	Italy	23684
Denmark	Japan	88348
Denmark	Japan	18696
Denmark	Latvia	1552
Denmark	Latvia	32
Denmark	Lithuania	1861
Denmark	Lithuania	263
Denmark	Luxembourg	13340
Denmark	Malta	372
Denmark	Netherlands	896803
Denmark	Netherlands	20353
Denmark	Norway	11211
Denmark	Philippines	343
Denmark	Poland	2001
Denmark	Portugal	715
Denmark	Romania	6404
Denmark	Serbia	27
Denmark	Slovakia	5792
Denmark	Spain	2233
Denmark	Spain	1715
Denmark	Sweden	1013
Denmark	Sweden	272896
Denmark	Switzerland	1257746
Denmark	Switzerland	30473
Denmark	Thailand	949
Denmark	Türkiye	140
Denmark	United Kingdom	1027460
Denmark	United Kingdom	294970
Denmark	USA	1459880
Denmark	USA	56127
Dominica	USA	40.826
Dominican Rep.	China	5634
Dominican Rep.	Spain	4154
Dominican Rep.	USA	344386
Dominican Rep.	USA	333
Ecuador	Brazil	5571
Ecuador	China	9219
Ecuador	Spain	14126
Ecuador	USA	1486
Ecuador	USA	1360
Egypt	Japan	400
Egypt	United Kingdom	486404
Egypt	USA	440
El Salvador	Canada	7.3
El Salvador	China	7046.16
El Salvador	Spain	6733.09
El Salvador	USA	1194.48
Estonia	Austria	7854
Estonia	China	149039
Estonia	Germany	4124
Estonia	Japan	510
Estonia	Norway	4558
Estonia	Other Europe, nes	13422
Estonia	Russian Federation	23
Estonia	Türkiye	29
Estonia	USA	181
Eswatini	South Africa	369.37
Eswatini	South Africa	349.885
Ethiopia	South Africa	307.158
Fiji	USA	1012
Finland	China	467419
Finland	China, Hong Kong SAR	650
Finland	Denmark	5802
Finland	Estonia	184788
Finland	France	286298
Finland	Germany	132791
Finland	Germany	2164
Finland	India	399
Finland	Japan	1928
Finland	Netherlands	64962
Finland	Netherlands	11
Finland	Norway	144883
Finland	Russian Federation	539
Finland	Sweden	710482
Finland	Sweden	1012
Finland	Switzerland	614260
Finland	Thailand	11520
Finland	United Kingdom	2215115
Finland	USA	34358
Finland	USA	5882
France	Areas, nes	127210
France	Australia	1208
France	Austria	290481
France	Belgium	1924049
France	Belgium	2827
France	Brazil	1863
France	Cambodia	3693
France	China	6979
France	China	1588523
France	China, Hong Kong SAR	66960
France	Côte d'Ivoire	66
France	Cyprus	1116
France	Czechia	462834
France	Dem. People's Rep. of Korea	10146
France	Denmark	33384
France	France	584241
France	France	4163
France	French Polynesia	28099
France	Germany	42199267
France	Germany	69383
France	Hungary	14194
France	India	4396
France	India	693
France	Ireland	185
France	Israel	559
France	Italy	25187004
France	Italy	98317
France	Japan	3025322
France	Japan	55467
France	Luxembourg	251
France	Netherlands	52397
France	Netherlands	433
France	New Caledonia	122
France	Philippines	12696
France	Poland	134392
France	Romania	48910
France	Singapore	498
France	South Africa	2042
France	Spain	8675047
France	Spain	24052
France	Sweden	1349
France	Switzerland	32301865
France	Switzerland	203851
France	Thailand	2927
France	United Arab Emirates	25819
France	United Kingdom	24965399
France	United Kingdom	421851
France	USA	39405604
France	USA	225484
France	Viet Nam	1470
French Polynesia	France	2167
French Polynesia	USA	994
Gabon	France	4871.39
Gabon	Italy	666.057
Gabon	Other Asia, nes	4956.47
Gabon	USA	995.154
Gambia	China	109.475
Gambia	Netherlands	18.903
Gambia	Spain	94.153
Georgia	Germany	560
Georgia	Russian Federation	288
Georgia	USA	214
Germany	Argentina	756.954
Germany	Australia	1722.4
Germany	Australia	34802.6
Germany	Austria	7.60322e+07
Germany	Austria	20241.2
Germany	Belgium	4.66558e+08
Germany	Belgium	1532.5
Germany	Brazil	106805
Germany	Bulgaria	474767
Germany	Cameroon	1.01864e+07
Germany	Canada	96750.7
Germany	Canada	1099.58
Germany	China	1.09166e+07
Germany	China	1.01825e+07
Germany	China, Hong Kong SAR	189.903
Germany	China, Hong Kong SAR	391465
Germany	Croatia	7.33411e+06
Germany	Cyprus	6.60933e+06
Germany	Czechia	7.55351e+07
Germany	Denmark	132860
Germany	Denmark	22869.3
Germany	Estonia	177403
Germany	Finland	9418.1
Germany	Finland	227.086
Germany	France	4.38274e+07
Germany	France	59667.9
Germany	French Polynesia	37382.9
Germany	Ghana	5.10203e+06
Germany	Greece	27845.3
Germany	Hungary	23925.1
Germany	India	3548.39
Germany	India	42785.2
Germany	Indonesia	5377.03
Germany	Iran	345277
Germany	Ireland	1.60991e+06
Germany	Israel	75686.1
Germany	Italy	7.69468e+07
Germany	Italy	90109.4
Germany	Japan	1.98064e+07
Germany	Japan	219999
Germany	Lithuania	1.37838e+06
Germany	Luxembourg	1.1064e+06
Germany	Mexico	8.08598e+06
Germany	Mexico	265.598
Germany	Netherlands	2.14971e+07
Germany	Netherlands	46569.9
Germany	New Zealand	29.216
Germany	Norway	2.20352e+07
Germany	Norway	15149.7
Germany	Other Asia, nes	1.03267e+06
Germany	Other Asia, nes	82.335
Germany	Philippines	4420.88
Germany	Poland	4.8919e+06
Germany	Portugal	99384.1
Germany	Rep. of Korea	2.67952e+07
Germany	Romania	14544.1
Germany	Russian Federation	2.76781e+08
Germany	Saudi Arabia	807392
Germany	Singapore	974250
Germany	Slovenia	1448.84
Germany	South Africa	6.79988e+08
Germany	Spain	376423
Germany	Sweden	25944.9
Germany	Sweden	204.51
Germany	Switzerland	2.49917e+08
Germany	Switzerland	87446.8
Germany	Thailand	665368
Germany	Thailand	2594.89
Germany	Türkiye	642.747
Germany	Türkiye	3485.97
Germany	Ukraine	150674
Germany	United Arab Emirates	7825.84
Germany	United Arab Emirates	3096.87
Germany	United Kingdom	4.8803e+08
Germany	United Kingdom	15499
Germany	USA	2.01261e+08
Germany	USA	113199
Germany	Viet Nam	39.84
Ghana	China	526
Greece	Austria	46290
Greece	Belgium	29796
Greece	China	30541
Greece	China, Hong Kong SAR	76862
Greece	Germany	17048
Greece	Germany	44297
Greece	Italy	19998
Greece	Italy	736
Greece	Netherlands	1909
Greece	Spain	2602
Greece	Switzerland	49948
Greece	Thailand	4036
Greece	United Kingdom	9244
Greece	United Kingdom	3691
Greece	USA	10783
Greenland	Denmark	10508.6
Grenada	USA	343.333
Guatemala	Panama	2436
Guatemala	Spain	852
Guatemala	USA	25626
Guatemala	USA	308
Guinea	China	891
Hungary	Austria	146247
Hungary	Austria	44167
Hungary	China	5993
Hungary	China, Hong Kong SAR	14758
Hungary	Czechia	7649
Hungary	Finland	523
Hungary	France	2582
Hungary	Germany	68906
Hungary	Germany	32456
Hungary	Italy	798242
Hungary	Switzerland	32037
Hungary	Thailand	5337
Hungary	United Kingdom	19399
Hungary	United Kingdom	3316
Hungary	USA	9446
Hungary	USA	919
Iceland	Austria	6070
Iceland	China	118
Iceland	China, Hong Kong SAR	1822
Iceland	Denmark	95
Iceland	Germany	57403
Iceland	Germany	442
Iceland	Italy	1797
Iceland	Netherlands	6342
Iceland	United Kingdom	732
Iceland	United Kingdom	145
Iceland	USA	46434
India	Austria	554
India	Belgium	2032
India	China	87005
India	China	6862
India	China, Hong Kong SAR	729049
India	China, Hong Kong SAR	11882
India	Czechia	431584
India	Egypt	2667832
India	Eswatini	2464
India	France	5910
India	Germany	24945842
India	Italy	4378759
India	Japan	10058855
India	Japan	60985
India	Netherlands	731
India	Norway	10992062
India	Russian Federation	3915711
India	Singapore	30457
India	South Africa	41366484
India	Spain	2344
India	Switzerland	732366
India	Switzerland	55148
India	United Arab Emirates	282122
India	United Kingdom	89986514
India	USA	16766963
Indonesia	China	4487
Indonesia	China	1102
Indonesia	China, Hong Kong SAR	56200
Indonesia	China, Hong Kong SAR	567
Indonesia	Ireland	3113
Indonesia	Japan	92479
Indonesia	Other Asia, nes	1047
Indonesia	Philippines	27
Indonesia	Rep. of Korea	9401
Indonesia	Singapore	196999
Indonesia	Singapore	999
Indonesia	Spain	1576
Indonesia	Thailand	597
Indonesia	United Kingdom	1996
Indonesia	USA	249
Indonesia	Viet Nam	2
Iran	Other Asia, nes	851159
Ireland	Areas, nes	28658.1
Ireland	Belgium	1.34103e+06
Ireland	Belgium	1053.2
Ireland	Canada	2839.52
Ireland	China	5720.2
Ireland	China	18397.1
Ireland	China, Hong Kong SAR	867.261
Ireland	Costa Rica	7645.98
Ireland	Germany	1.98079e+08
Ireland	Germany	23224.8
Ireland	India	1290.93
Ireland	Israel	1633.59
Ireland	Italy	14495.1
Ireland	Japan	37045.2
Ireland	Netherlands	1.21948e+06
Ireland	Norway	2.29017e+06
Ireland	South Africa	302314
Ireland	Switzerland	2500.85
Ireland	Thailand	1555.23
Ireland	Thailand	83528
Ireland	United Arab Emirates	564.45
Ireland	United Kingdom	2.66601e+07
Ireland	United Kingdom	141557
Ireland	USA	1.74941e+07
Ireland	USA	27934.3
Ireland	Viet Nam	11941.1
Israel	Austria	2000
Israel	China	103000
Israel	China, Hong Kong SAR	57000
Israel	Czechia	87000
Israel	France	1000
Israel	Germany	1016000
Israel	India	16000
Israel	Italy	21000
Israel	Italy	1000
Israel	Spain	1000
Israel	Switzerland	702000
Israel	Thailand	10000
Israel	United Kingdom	471000
Israel	USA	2639000
Israel	USA	6000
Italy	Australia	2788485
Italy	Austria	2461453
Italy	Austria	113
Italy	Belgium	4931787
Italy	Belgium	1045
Italy	Bosnia Herzegovina	267689
Italy	Bulgaria	8576
Italy	China	1078758
Italy	China, Hong Kong SAR	96737
Italy	China, Hong Kong SAR	128913
Italy	Cyprus	35290
Italy	Czechia	8289309
Italy	Egypt	96125
Italy	France	11364990
Italy	France	19945
Italy	Germany	29732469
Italy	Germany	472370
Italy	Greece	42111
Italy	Greece	190
Italy	Hungary	435403
Italy	India	2277
Italy	Ireland	38221
Italy	Japan	70560
Italy	Japan	16788
Italy	Luxembourg	13726
Italy	Netherlands	2116216
Italy	Netherlands	6050
Italy	Norway	13770687
Italy	Poland	138463
Italy	Poland	578
Italy	Portugal	130145
Italy	Rep. of Korea	9977791
Italy	Romania	381742
Italy	Russian Federation	1875192
Italy	Slovenia	29703
Italy	South Africa	82581867
Italy	Spain	2127193
Italy	Spain	32626
Italy	Sweden	101
Italy	Switzerland	100578818
Italy	Switzerland	25284
Italy	Thailand	1637
Italy	Türkiye	25096
Italy	United Kingdom	51181966
Italy	United Kingdom	11729
Italy	USA	112088000
Italy	USA	305359
Italy	Viet Nam	219551
Jamaica	Canada	104
Jamaica	China	5127
Jamaica	Japan	412
Jamaica	Switzerland	7483
Jamaica	Thailand	41
Jamaica	USA	92466
Japan	Australia	153537
Japan	Australia	13414932
Japan	Belgium	6720348
Japan	China	53673312
Japan	China	3297856
Japan	China, Hong Kong SAR	138702
Japan	China, Hong Kong SAR	1573528
Japan	Colombia	6684
Japan	Costa Rica	7812
Japan	Czechia	300307
Japan	Denmark	4480
Japan	France	5526
Japan	France	252778
Japan	French Polynesia	49826
Japan	Germany	67021933
Japan	Germany	29680
Japan	Greece	5341
Japan	India	6520
Japan	Indonesia	6336
Japan	Indonesia	104634
Japan	Israel	9760
Japan	Italy	28450603
Japan	Italy	188118
Japan	Malaysia	522647
Japan	Norway	49963933
Japan	Other Asia, nes	24376625
Japan	Other Asia, nes	37031
Japan	Philippines	2667397
Japan	Philippines	18782
Japan	Rep. of Korea	61821904
Japan	Rep. of Korea	100400
Japan	Russian Federation	606970357
Japan	Singapore	24144
Japan	Singapore	7351
Japan	South Africa	2788620975
Japan	Sri Lanka	14394
Japan	Sweden	2594
Japan	Switzerland	35806465
Japan	Thailand	972924
Japan	Thailand	51476
Japan	United Kingdom	168103447
Japan	United Kingdom	38507
Japan	USA	157174961
Japan	USA	834673
Japan	Viet Nam	53404
Jordan	China, Hong Kong SAR	272
Jordan	Italy	65127
Jordan	United Kingdom	731
Jordan	USA	9273
Kazakhstan	Austria	17617
Kazakhstan	Germany	2000
Kazakhstan	Italy	3800
Kazakhstan	Russian Federation	96732
Kazakhstan	Russian Federation	854
Kazakhstan	Spain	102
Kazakhstan	Switzerland	2542126
Kazakhstan	USA	6738
Kenya	China	942
Kenya	France	17150
Kenya	Other Asia, nes	354
Kenya	South Africa	243
Kuwait	China	41264
Kuwait	Egypt	360
Kuwait	Germany	451145
Kuwait	Indonesia	1058
Kuwait	Italy	2306
Kuwait	Spain	1608
Kuwait	Syria	11
Kuwait	Thailand	2081
Kuwait	Türkiye	1474
Kuwait	USA	67004
Kuwait	USA	14321
Lao People's Dem. Rep.	Switzerland	1545033
Latvia	Austria	1030
Latvia	Belgium	24184
Latvia	China	37536
Latvia	China	21167
Latvia	China, Hong Kong SAR	23579
Latvia	Estonia	2386
Latvia	Germany	2736
Latvia	Germany	13590
Latvia	India	767
Latvia	Lithuania	102
Latvia	Philippines	68
Latvia	Russian Federation	124270
Latvia	Spain	72395
Latvia	Thailand	4865
Latvia	United Kingdom	1717
Latvia	United Kingdom	55470
Latvia	USA	21
Lebanon	China	26763
Lebanon	France	803
Lebanon	Italy	791
Lebanon	Switzerland	230151
Lebanon	USA	333599
Lebanon	USA	946
Lesotho	USA	239.564
Lithuania	Belarus	64
Lithuania	Belgium	1055
Lithuania	China	7557
Lithuania	France	186
Lithuania	Germany	22714
Lithuania	Germany	504
Lithuania	Latvia	45
Lithuania	Poland	17203
Lithuania	Switzerland	125
Lithuania	United Kingdom	1823
Lithuania	USA	8158
Lithuania	USA	247
Luxembourg	Belgium	2392
Luxembourg	Belgium	11955
Luxembourg	China	59097
Luxembourg	China, Hong Kong SAR	142
Luxembourg	France	45041
Luxembourg	France	1702
Luxembourg	French Polynesia	33123
Luxembourg	Germany	292539
Luxembourg	Germany	12754
Luxembourg	Netherlands	1454
Luxembourg	Other Europe, nes	12961
Luxembourg	Switzerland	290490
Luxembourg	Türkiye	60
Luxembourg	United Kingdom	279
Madagascar	Other Europe, nes	3914.42
Madagascar	USA	1392.48
Malawi	China	106.746
Malawi	United Kingdom	234.567
Malaysia	Australia	9821
Malaysia	Canada	21840
Malaysia	China	117722884
Malaysia	China	1663
Malaysia	China, Hong Kong SAR	61451
Malaysia	China, Hong Kong SAR	443171
Malaysia	Germany	96884
Malaysia	Germany	119471
Malaysia	India	2401
Malaysia	Italy	17405
Malaysia	Italy	805
Malaysia	Japan	5004142
Malaysia	Japan	450783
Malaysia	Other Asia, nes	291876
Malaysia	Rep. of Korea	572726
Malaysia	Singapore	5470786
Malaysia	Singapore	43194
Malaysia	Switzerland	4157263
Malaysia	Thailand	1840
Malaysia	Thailand	29642
Malaysia	United Arab Emirates	2648
Malaysia	United Arab Emirates	5191
Malaysia	United Kingdom	31362
Malaysia	USA	5236065
Maldives	China	2393
Maldives	Indonesia	530
Maldives	Singapore	22940
Maldives	Sri Lanka	920
Maldives	Thailand	2640
Maldives	Türkiye	749
Malta	Austria	27263
Malta	China	12750
Malta	China, Hong Kong SAR	10259
Malta	Germany	41763
Malta	Germany	6682
Malta	Italy	1181
Malta	Switzerland	737
Malta	Türkiye	133
Malta	United Kingdom	255
Malta	USA	3923
Malta	USA	1523
Mauritius	China	13487
Mauritius	France	2755
Mauritius	France	3717
Mauritius	India	278
Mauritius	Italy	38775
Mauritius	South Africa	6803
Mauritius	United Arab Emirates	962895
Mauritius	United Kingdom	8804
Mexico	Austria	13360
Mexico	Belgium	1059
Mexico	Canada	521201
Mexico	Canada	1218
Mexico	China	249
Mexico	China	408992
Mexico	China, Hong Kong SAR	35841
Mexico	Denmark	289
Mexico	Germany	1267729
Mexico	Guatemala	568
Mexico	India	59
Mexico	Indonesia	670
Mexico	Ireland	3149
Mexico	Italy	5635
Mexico	Italy	14403
Mexico	Japan	1363950
Mexico	Japan	5616
Mexico	Other Asia, nes	71
Mexico	Rep. of Korea	404
Mexico	Spain	583392
Mexico	Thailand	8006
Mexico	United Kingdom	127717
Mexico	USA	15794086
Mexico	USA	1202031
Mexico	Viet Nam	136
Mongolia	Australia	3013
Mongolia	China	15871
Mongolia	Germany	5810
Mongolia	Italy	609
Mongolia	Japan	25902
Mongolia	Switzerland	3481
Mongolia	USA	213
Montenegro	China	3126
Montenegro	Slovenia	93
Morocco	Austria	6863
Morocco	China	35903
Morocco	France	69245
Morocco	France	3646
Morocco	Spain	4377
Mozambique	Portugal	110
Myanmar	India	910
Namibia	South Africa	25858
Namibia	South Africa	28759
Namibia	United Rep. of Tanzania	7
Nepal	China	9178
Nepal	India	38
Nepal	India	5262
Netherlands	Australia	2195.32
Netherlands	Austria	290515
Netherlands	Belgium	3.70991e+06
Netherlands	Belgium	2020.01
Netherlands	China	12057.7
Netherlands	China	238903
Netherlands	China, Hong Kong SAR	5129.05
Netherlands	Denmark	91952.4
Netherlands	France	862465
Netherlands	French Polynesia	1268.32
Netherlands	Germany	2.51632e+07
Netherlands	Germany	573139
Netherlands	India	4706.72
Netherlands	India	3152.86
Netherlands	Ireland	1868.61
Netherlands	Israel	5419.9
Netherlands	Italy	237620
Netherlands	Japan	253.664
Netherlands	Japan	2621.63
Netherlands	Malaysia	144.761
Netherlands	New Zealand	1725.18
Netherlands	Other Asia, nes	74.373
Netherlands	Other Asia, nes	11592.8
Netherlands	Philippines	719.82
Netherlands	Poland	158651
Netherlands	Rep. of Korea	177.963
Netherlands	Spain	428895
Netherlands	Switzerland	1.54614e+06
Netherlands	Thailand	806.145
Netherlands	United Arab Emirates	177347
Netherlands	United Kingdom	1.39519e+06
Netherlands	USA	1.01384e+06
Netherlands	USA	41461.4
New Caledonia	China	8846
New Caledonia	China, Hong Kong SAR	4700
New Caledonia	France	204
New Caledonia	France	5852
New Caledonia	French Polynesia	36981
New Caledonia	Thailand	654
New Zealand	Australia	3905.04
New Zealand	Australia	26540.2
New Zealand	Austria	5492.8
New Zealand	China	193981
New Zealand	China, Hong Kong SAR	27662.4
New Zealand	Cook Isds	11417.6
New Zealand	Eswatini	4395.22
New Zealand	France	1927.11
New Zealand	Germany	155879
New Zealand	Indonesia	8183.87
New Zealand	Japan	2.79167e+06
New Zealand	New Zealand	3434.54
New Zealand	Russian Federation	66540.7
New Zealand	Spain	2383.68
New Zealand	Switzerland	64787.3
New Zealand	Switzerland	956.588
New Zealand	Thailand	2187.78
New Zealand	United Kingdom	9686.38
New Zealand	United Kingdom	1294.3
New Zealand	USA	1.3969e+06
New Zealand	USA	3386.99
Nicaragua	United Kingdom	279
Niger	Burkina Faso	76
Niger	Nigeria	55
Nigeria	China	141001
Nigeria	Germany	42804
North Macedonia	China	448
North Macedonia	France	1
North Macedonia	Germany	137
North Macedonia	Japan	9676
North Macedonia	United Kingdom	522646758
Norway	Australia	2149
Norway	Belgium	13223
Norway	China	542190
Norway	China, Hong Kong SAR	5929
Norway	Denmark	25267
Norway	Denmark	11607
Norway	Fiji	7392
Norway	Finland	182
Norway	France	56061
Norway	France	282
Norway	French Polynesia	13011
Norway	Germany	15610078
Norway	Germany	67826
Norway	Ghana	4515
Norway	India	17285
Norway	Indonesia	8149
Norway	Israel	829
Norway	Italy	81033
Norway	Italy	2722
Norway	Japan	1061
Norway	Kenya	2403
Norway	Netherlands	4122
Norway	Other Asia, nes	211
Norway	Philippines	1595
Norway	Poland	406
Norway	Rep. of Korea	214
Norway	Sweden	48266
Norway	Sweden	1144
Norway	Switzerland	102128
Norway	Thailand	1030
Norway	United Kingdom	4822305
Norway	United Kingdom	3970
Norway	USA	729637
Norway	USA	2128
Oman	China, Hong Kong SAR	926
Oman	Germany	70
Oman	Pakistan	780
Oman	United Arab Emirates	59467
Oman	United Arab Emirates	375841
Other Asia, nes	Areas, nes	74413
Other Asia, nes	Australia	374011
Other Asia, nes	Austria	2856
Other Asia, nes	Belgium	202
Other Asia, nes	Canada	4804
Other Asia, nes	China	84121
Other Asia, nes	China	4357452
Other Asia, nes	China, Hong Kong SAR	861405
Other Asia, nes	China, Hong Kong SAR	43606
Other Asia, nes	France	67
Other Asia, nes	France	168
Other Asia, nes	French Polynesia	10582
Other Asia, nes	Germany	50072840
Other Asia, nes	India	28354
Other Asia, nes	Indonesia	15218
Other Asia, nes	Italy	54356
Other Asia, nes	Italy	168
Other Asia, nes	Japan	123760199
Other Asia, nes	Japan	178590
Other Asia, nes	Malaysia	31680
Other Asia, nes	Rep. of Korea	745503
Other Asia, nes	Rep. of Korea	40045
Other Asia, nes	Singapore	676029
Other Asia, nes	South Africa	23376298
Other Asia, nes	Spain	67
Other Asia, nes	Switzerland	244873
Other Asia, nes	United Kingdom	10353426
Other Asia, nes	USA	35536622
Other Asia, nes	USA	44715
Other Asia, nes	Viet Nam	98063
Pakistan	Belgium	236
Pakistan	Switzerland	296
Palau	China, Hong Kong SAR	8
Palau	Guam	56
Palau	Philippines	159
Palau	USA	1836
Panama	Free Zones	64857
Panama	Free Zones	356
Panama	Switzerland	6217
Panama	USA	15891
Panama	USA	2134
Paraguay	Netherlands	986
Paraguay	USA	633
Peru	Canada	25769.2
Peru	China	30003.1
Peru	Colombia	6346
Peru	Spain	3324.81
Peru	Türkiye	144923
Peru	USA	28.11
Philippines	Germany	47463
Philippines	Japan	4870
Philippines	Rep. of Korea	1464
Poland	Australia	1640
Poland	Austria	1069
Poland	China	798524
Poland	China, Hong Kong SAR	279293
Poland	Czechia	560712
Poland	Denmark	11474
Poland	France	55708
Poland	Germany	7882207
Poland	Germany	1950
Poland	India	6475
Poland	Indonesia	400
Poland	Ireland	267582
Poland	Italy	6953
Poland	Italy	1492
Poland	Japan	1069
Poland	Lebanon	423
Poland	Netherlands	2834952
Poland	Russian Federation	5787
Poland	Spain	30507
Poland	Sweden	7201
Poland	Switzerland	247926
Poland	Thailand	281
Poland	United Kingdom	6651046
Poland	USA	151190
Poland	USA	683
Portugal	Austria	47341
Portugal	China	70520
Portugal	China, Hong Kong SAR	8202
Portugal	France	620
Portugal	France	64
Portugal	Germany	5351707
Portugal	Germany	7376
Portugal	Italy	2544052
Portugal	Italy	724
Portugal	Spain	137247
Portugal	Spain	56679
Portugal	Switzerland	174
Portugal	United Kingdom	1659979
Portugal	United Kingdom	1518
Portugal	USA	7704
Qatar	China	970800
Qatar	China, Hong Kong SAR	135527
Qatar	France	601658
Qatar	Germany	1.06766e+06
Qatar	India	53875.7
Qatar	Italy	29629.5
Qatar	Other Asia, nes	15673.2
Qatar	Rep. of Korea	104281
Qatar	Spain	113836
Qatar	Switzerland	234643
Qatar	Thailand	51491.9
Qatar	Türkiye	17361
Qatar	United Kingdom	55744.8
Qatar	USA	14662.2
Rep. of Korea	Areas, nes	15445
Rep. of Korea	Australia	31342
Rep. of Korea	Australia	98834
Rep. of Korea	Belgium	41980866
Rep. of Korea	Canada	433
Rep. of Korea	China	1275
Rep. of Korea	China	307960
Rep. of Korea	China, Hong Kong SAR	56207
Rep. of Korea	Costa Rica	4090
Rep. of Korea	Denmark	1931
Rep. of Korea	France	126
Rep. of Korea	Germany	53247767
Rep. of Korea	India	3062
Rep. of Korea	Indonesia	11536
Rep. of Korea	Italy	5588
Rep. of Korea	Japan	58290430
Rep. of Korea	Japan	710028
Rep. of Korea	Netherlands	50464576
Rep. of Korea	Norway	13602279
Rep. of Korea	Other Asia, nes	352280
Rep. of Korea	Pakistan	48
Rep. of Korea	Philippines	24
Rep. of Korea	Russian Federation	7505818
Rep. of Korea	South Africa	291224615
Rep. of Korea	Spain	141976
Rep. of Korea	Switzerland	5061774
Rep. of Korea	Thailand	9433
Rep. of Korea	United Kingdom	107844332
Rep. of Korea	United Kingdom	1269
Rep. of Korea	USA	78767757
Rep. of Korea	USA	55432
Rep. of Moldova	Russian Federation	12697
Russian Federation	Australia	1033
Russian Federation	Belarus	440147
Russian Federation	China	863943
Russian Federation	Costa Rica	7142
Russian Federation	France	1010
Russian Federation	Germany	287636
Russian Federation	Germany	45686
Russian Federation	Greece	93
Russian Federation	Israel	1201
Russian Federation	Italy	8651
Russian Federation	Italy	101934
Russian Federation	Japan	1849
Russian Federation	Kazakhstan	2540639
Russian Federation	Netherlands	12336
Russian Federation	Netherlands	464
Russian Federation	Other Asia, nes	825
Russian Federation	Other Europe, nes	10432
Russian Federation	Philippines	2307
Russian Federation	Spain	950
Russian Federation	Switzerland	9203
Russian Federation	Thailand	11435
Russian Federation	Türkiye	13665
Russian Federation	Ukraine	350914
Russian Federation	United Kingdom	1216072
Russian Federation	United Kingdom	34
Russian Federation	USA	80771
Russian Federation	USA	82284
Russian Federation	Uzbekistan	338308
Rwanda	Kenya	48.577
Rwanda	Kenya	1386.85
Saint Kitts and Nevis	USA	335
Saint Lucia	Areas, nes	470
Saint Lucia	USA	66
Saint Vincent and the Grenadines	USA	20.893
Samoa	Australia	165
Samoa	China	33
Sao Tome and Principe	Portugal	116
Saudi Arabia	France	33067
Saudi Arabia	France	120000
Saudi Arabia	Italy	33067
Saudi Arabia	Italy	216000
Saudi Arabia	Switzerland	27467
Saudi Arabia	United Arab Emirates	169334
Saudi Arabia	USA	108000
Senegal	China	1368
Senegal	China, Hong Kong SAR	1967
Senegal	France	730
Senegal	France	656
Senegal	Türkiye	6872
Senegal	United Arab Emirates	1503
Serbia	China	12733
Serbia	Germany	1927439
Serbia	Hungary	758
Serbia	Israel	45
Serbia	Italy	3864
Serbia	North Macedonia	490
Serbia	Slovenia	7373
Serbia	Spain	13518
Serbia	Switzerland	148
Seychelles	China, Hong Kong SAR	151540
Singapore	Australia	57110.1
Singapore	Australia	89197
Singapore	Austria	1465.65
Singapore	Canada	5753.92
Singapore	China	67917.9
Singapore	China	187121
Singapore	China, Hong Kong SAR	1.76491e+06
Singapore	China, Hong Kong SAR	1.34918e+06
Singapore	Czechia	4460.09
Singapore	France	115738
Singapore	France	7488.89
Singapore	French Polynesia	59643.4
Singapore	Germany	4.34631e+07
Singapore	Germany	8077.07
Singapore	India	13227.6
Singapore	India	156.635
Singapore	Indonesia	1305.82
Singapore	Indonesia	228058
Singapore	Israel	1235.49
Singapore	Italy	1649.46
Singapore	Japan	3.00058e+07
Singapore	Japan	1.62249e+06
Singapore	Malaysia	628260
Singapore	Malaysia	116379
Singapore	Other Asia, nes	5.76678e+06
Singapore	Philippines	29535.2
Singapore	Rep. of Korea	2049.04
Singapore	Russian Federation	421193
Singapore	Switzerland	1.49123e+06
Singapore	Thailand	19978.9
Singapore	Thailand	67000.4
Singapore	Türkiye	1440.88
Singapore	United Kingdom	242481
Singapore	United Kingdom	647.316
Singapore	USA	2.15864e+07
Singapore	USA	49023.4
Singapore	Viet Nam	2506.15
Slovakia	Areas, nes	148.749
Slovakia	Austria	59131.8
Slovakia	China	26541.1
Slovakia	China, Hong Kong SAR	159.374
Slovakia	Czechia	2.1709e+06
Slovakia	Czechia	25671.2
Slovakia	Denmark	58240.6
Slovakia	Germany	8.91293e+06
Slovakia	Germany	14151.1
Slovakia	Italy	33468.6
Slovakia	Japan	114562
Slovakia	Other Asia, nes	2121
Slovakia	Other Europe, nes	1.6307e+07
Slovakia	Other Europe, nes	339.998
Slovakia	Slovakia	1.15261e+07
Slovakia	Switzerland	224420
Slovakia	United Kingdom	6.67906e+07
Slovakia	United Kingdom	726.481
Slovakia	USA	4580.68
Slovakia	USA	136.796
Slovenia	Austria	7386745
Slovenia	Belgium	367
Slovenia	China	42756
Slovenia	Croatia	659
Slovenia	Czechia	3253
Slovenia	Germany	353844
Slovenia	Germany	8823
Slovenia	India	539
Slovenia	Italy	18485
Slovenia	Italy	8551
Slovenia	Netherlands	1276
Slovenia	Switzerland	19026
Slovenia	USA	11039
Slovenia	USA	225
South Africa	Areas, nes	108559
South Africa	Austria	28291.3
South Africa	Austria	720.245
South Africa	Botswana	719.209
South Africa	Canada	232.314
South Africa	China	276.125
South Africa	China	40707
South Africa	China, Hong Kong SAR	1183.42
South Africa	China, Hong Kong SAR	183.22
South Africa	Dem. Rep. of the Congo	444.534
South Africa	Denmark	724.077
South Africa	France	190.159
South Africa	Germany	3.84687e+07
South Africa	Germany	6860.14
South Africa	Ireland	30515.9
South Africa	Italy	38.736
South Africa	Japan	1111.54
South Africa	Japan	743.652
South Africa	Mozambique	127.187
South Africa	Norway	82076.6
South Africa	Other Asia, nes	2597.29
South Africa	Rep. of Korea	5804.63
South Africa	South Africa	113238
South Africa	Spain	244.846
South Africa	Switzerland	1.28314e+06
South Africa	Thailand	246080
South Africa	Tunisia	935.986
South Africa	United Kingdom	181624
South Africa	USA	128640
South Africa	USA	13522.8
Spain	Australia	25972.4
Spain	Australia	22907.9
Spain	Austria	13833.1
Spain	Belgium	134679
Spain	China	731670
Spain	China, Hong Kong SAR	220587
Spain	Cyprus	2283.5
Spain	Czechia	5550.62
Spain	Czechia	17.271
Spain	Denmark	4906.77
Spain	France	211803
Spain	France	8253.63
Spain	Germany	2.37401e+06
Spain	Germany	11193.9
Spain	Gibraltar	1343.4
Spain	Greece	5011.46
Spain	India	74.398
Spain	Ireland	1630.86
Spain	Ireland	170.052
Spain	Italy	4.03371e+06
Spain	Italy	31982.2
Spain	Japan	73769.5
Spain	Netherlands	12440.4
Spain	Other Asia, nes	23574.8
Spain	Other Europe, nes	6702.94
Spain	Other Europe, nes	151206
Spain	Poland	4425.22
Spain	Portugal	12362
Spain	Portugal	20418.7
Spain	Rep. of Korea	147.188
Spain	Russian Federation	41094.8
Spain	Sweden	1620.36
Spain	Switzerland	1.04494e+06
Spain	Switzerland	6283.97
Spain	Thailand	15570.1
Spain	Türkiye	601.826
Spain	United Kingdom	3.83469e+07
Spain	United Kingdom	17121.7
Spain	USA	983401
Spain	USA	9162.81
Sri Lanka	China, Hong Kong SAR	346378
Sri Lanka	Iceland	11891
Sri Lanka	Italy	4750
Sri Lanka	Other Asia, nes	13179
Sri Lanka	Singapore	1420
Sri Lanka	Switzerland	1264
Sri Lanka	USA	30948
Sweden	Austria	1.0413e+06
Sweden	Belgium	307.078
Sweden	Canada	153.539
Sweden	China	1381.85
Sweden	China	1.04192e+06
Sweden	China, Hong Kong SAR	131276
Sweden	Czechia	614.156
Sweden	Denmark	34546.3
Sweden	Denmark	8598.19
Sweden	Finland	4299.1
Sweden	Finland	2610.16
Sweden	France	620605
Sweden	France	273607
Sweden	Germany	4.15784e+06
Sweden	Germany	23184.4
Sweden	India	18117.6
Sweden	Ireland	614.156
Sweden	Italy	5680.95
Sweden	Italy	2149.55
Sweden	Netherlands	1842.47
Sweden	Norway	2.3688e+06
Sweden	Norway	767.696
Sweden	Russian Federation	5680.95
Sweden	Switzerland	857516
Sweden	Thailand	2149.55
Sweden	United Kingdom	3.18118e+06
Sweden	United Kingdom	9980.04
Sweden	USA	356057
Sweden	USA	2763.7
Sweden	Viet Nam	307.078
Switzerland	Australia	170183
Switzerland	Australia	249110
Switzerland	Austria	165267
Switzerland	Austria	33177.9
Switzerland	Bahamas	532.029
Switzerland	Belarus	146831
Switzerland	Belgium	2.36422e+06
Switzerland	Belgium	11301
Switzerland	Brazil	1487.09
Switzerland	Canada	2246.82
Switzerland	Chile	634305
Switzerland	China	49319
Switzerland	China	366996
Switzerland	China, Hong Kong SAR	6.28702e+06
Switzerland	China, Hong Kong SAR	3.04359e+06
Switzerland	Czechia	1.14538e+07
Switzerland	Czechia	135.975
Switzerland	Denmark	296024
Switzerland	Denmark	2271.64
Switzerland	France	4.57503e+07
Switzerland	France	2.56943e+06
Switzerland	French Polynesia	5701.24
Switzerland	Germany	2.92445e+08
Switzerland	Germany	3.64597e+06
Switzerland	India	351723
Switzerland	Ireland	83.096
Switzerland	Israel	23888.4
Switzerland	Italy	1.54676e+08
Switzerland	Italy	3.62218e+06
Switzerland	Japan	2.9938e+08
Switzerland	Japan	115574
Switzerland	Kazakhstan	1.16618e+06
Switzerland	Lebanon	20600.2
Switzerland	Lithuania	429.508
Switzerland	Luxembourg	49102.1
Switzerland	Madagascar	3777.08
Switzerland	Mexico	20344.4
Switzerland	Netherlands	62851.7
Switzerland	Netherlands	288192
Switzerland	New Zealand	268.712
Switzerland	Norway	1877.75
Switzerland	Other Asia, nes	4.76364e+06
Switzerland	Other Asia, nes	9.712
Switzerland	Peru	324182
Switzerland	Philippines	19166
Switzerland	Qatar	84918.5
Switzerland	Russian Federation	4.76244e+08
Switzerland	Serbia	778809
Switzerland	Singapore	871890
Switzerland	Singapore	9.53556e+06
Switzerland	Somalia	53958.3
Switzerland	South Africa	8.97205e+08
Switzerland	Spain	3.84871e+06
Switzerland	Spain	47.483
Switzerland	Sweden	49488.4
Switzerland	Sweden	1089.96
Switzerland	Thailand	1510.83
Switzerland	United Arab Emirates	324695
Switzerland	United Arab Emirates	2.76652e+06
Switzerland	United Kingdom	1.52733e+08
Switzerland	United Kingdom	1.44774e+06
Switzerland	USA	2.82481e+08
Switzerland	USA	998322
Switzerland	Viet Nam	44.246
Thailand	Australia	7643
Thailand	Australia	1362759
Thailand	Canada	3824
Thailand	China	16130
Thailand	China	104816
Thailand	China, Hong Kong SAR	2398398
Thailand	China, Hong Kong SAR	38465
Thailand	Denmark	1289
Thailand	France	14249
Thailand	French Polynesia	3484
Thailand	Germany	5643532
Thailand	Germany	19336
Thailand	India	24512
Thailand	India	481
Thailand	Indonesia	1717
Thailand	Italy	933350
Thailand	Italy	500
Thailand	Japan	37962758
Thailand	Japan	169572
Thailand	Malaysia	13490
Thailand	Myanmar	10002
Thailand	Netherlands	35884
Thailand	New Zealand	272422
Thailand	Other Asia, nes	225
Thailand	Singapore	3137
Thailand	Singapore	125
Thailand	Spain	36903
Thailand	Sri Lanka	1156
Thailand	Switzerland	248810
Thailand	Thailand	148268
Thailand	Thailand	919065
Thailand	United Arab Emirates	15712
Thailand	United Arab Emirates	898965
Thailand	United Kingdom	510647
Thailand	USA	5525516
Thailand	USA	18672
Thailand	Viet Nam	448
Togo	China	2024.12
Tonga	China	1203
Trinidad and Tobago	Canada	747.675
Trinidad and Tobago	China	465.958
Trinidad and Tobago	New Zealand	1010.77
Trinidad and Tobago	USA	3937.52
Trinidad and Tobago	USA	4521.6
Tunisia	Italy	2271
Türkiye	Austria	1638122
Türkiye	Belgium	1435
Türkiye	China	70786
Türkiye	China, Hong Kong SAR	3367
Türkiye	Denmark	12858
Türkiye	France	1162
Türkiye	France	54357
Türkiye	Germany	990996
Türkiye	Italy	153859
Türkiye	Italy	3716
Türkiye	Japan	4527
Türkiye	Switzerland	19858
Türkiye	Thailand	708
Türkiye	United Kingdom	1162833
Türkiye	USA	674177
Türkiye	Viet Nam	4171
Uganda	China	1168
Uganda	United Kingdom	137
Ukraine	Austria	7429
Ukraine	China	24201
Ukraine	Cyprus	632
Ukraine	Czechia	413047
Ukraine	France	2921
Ukraine	Germany	2570200
Ukraine	Germany	11640
Ukraine	Italy	6272
Ukraine	Italy	33
Ukraine	Japan	17963
Ukraine	Poland	385
Ukraine	Russian Federation	760950
Ukraine	Switzerland	170656
Ukraine	Thailand	381
Ukraine	Türkiye	249
Ukraine	United Kingdom	135162
Ukraine	USA	9182
United Arab Emirates	Angola	25235
United Arab Emirates	Australia	12264
United Arab Emirates	Austria	10466.2
United Arab Emirates	Belgium	47028.2
United Arab Emirates	Canada	1771.4
United Arab Emirates	China	24488.3
United Arab Emirates	China, Hong Kong SAR	206555
United Arab Emirates	France	742.546
United Arab Emirates	Germany	64998.9
United Arab Emirates	India	9083.01
United Arab Emirates	Italy	302374
United Arab Emirates	Italy	136387
United Arab Emirates	Japan	1.4838e+07
United Arab Emirates	Kenya	8658.95
United Arab Emirates	Kuwait	67276.4
United Arab Emirates	Kuwait	148.128
United Arab Emirates	Lebanon	2069.16
United Arab Emirates	Malaysia	18485.8
United Arab Emirates	Malaysia	87766.6
United Arab Emirates	Norway	1637.48
United Arab Emirates	Poland	565.555
United Arab Emirates	Rep. of Korea	435799
United Arab Emirates	Saudi Arabia	3144.18
United Arab Emirates	South Africa	3.18792e+06
United Arab Emirates	Switzerland	6.6756e+07
United Arab Emirates	Switzerland	12055.6
United Arab Emirates	Syria	328.931
United Arab Emirates	United Kingdom	2.19937e+07
United Arab Emirates	United Kingdom	13991.9
United Arab Emirates	USA	210832
United Arab Emirates	USA	33965.8
United Arab Emirates	Zimbabwe	1.15444e+07
United Kingdom	Australia	2415133
United Kingdom	Australia	9273
United Kingdom	Austria	592763
United Kingdom	Belgium	173023535
United Kingdom	Belgium	2735
United Kingdom	Brazil	552929
United Kingdom	Bulgaria	2993
United Kingdom	Canada	86521467
United Kingdom	Canada	9427
United Kingdom	China	2884289
United Kingdom	China	2782863
United Kingdom	China, Hong Kong SAR	217106
United Kingdom	China, Hong Kong SAR	238728
United Kingdom	Colombia	12352
United Kingdom	Côte d'Ivoire	14116
United Kingdom	Czechia	236
United Kingdom	Denmark	12272
United Kingdom	France	212859
United Kingdom	France	631326
United Kingdom	French Polynesia	79194
United Kingdom	Germany	72469304
United Kingdom	Germany	357363
United Kingdom	Greece	680
United Kingdom	Hungary	414
United Kingdom	India	1398006
United Kingdom	India	142579
United Kingdom	Indonesia	141686
United Kingdom	Ireland	26170833
United Kingdom	Ireland	3391
United Kingdom	Israel	7677
United Kingdom	Italy	124982605
United Kingdom	Italy	318498
United Kingdom	Japan	16201680
United Kingdom	Japan	1123877
United Kingdom	Jordan	3843
United Kingdom	Netherlands	312602
United Kingdom	Netherlands	99020
United Kingdom	New Zealand	1750
United Kingdom	Norway	118775391
United Kingdom	Pakistan	53186
United Kingdom	Pakistan	4834
United Kingdom	Philippines	42575
United Kingdom	Poland	170
United Kingdom	Rep. of Korea	5911718
United Kingdom	Rep. of Korea	2745
United Kingdom	Russian Federation	75262938
United Kingdom	Singapore	336079
United Kingdom	Slovakia	10081
United Kingdom	South Africa	793183440
United Kingdom	South Africa	3736
United Kingdom	Spain	4177472
United Kingdom	Spain	37070
United Kingdom	Sri Lanka	2604
United Kingdom	Sweden	2621
United Kingdom	Switzerland	1275296577
United Kingdom	Switzerland	6461
United Kingdom	Thailand	141920
United Kingdom	Thailand	306970
United Kingdom	Türkiye	226309
United Kingdom	Türkiye	2086
United Kingdom	Ukraine	208522
United Kingdom	United Arab Emirates	18048
United Kingdom	United Arab Emirates	18376
United Kingdom	United Kingdom	206339
United Kingdom	United Kingdom	43387
United Kingdom	USA	139504928
United Kingdom	USA	413869
United Kingdom	Uzbekistan	2165423
United Rep. of Tanzania	Australia	3494
United Rep. of Tanzania	China	3790
United Rep. of Tanzania	Germany	126
United Rep. of Tanzania	United Arab Emirates	44
Uruguay	Brazil	3037
Uruguay	China	13826
Uruguay	China	8628
Uruguay	French Polynesia	2350
Uruguay	Netherlands	6308
Uruguay	Other Asia, nes	272
Uruguay	Spain	866
Uruguay	USA	79197
Uruguay	USA	340
USA	Argentina	833902
USA	Australia	66049607
USA	Australia	1079501
USA	Austria	6564603
USA	Austria	8639
USA	Bahamas	4344
USA	Belarus	476441
USA	Belgium	99464480
USA	Brazil	26078090
USA	Cameroon	14465
USA	Canada	85288114
USA	Canada	566333
USA	Chile	45063
USA	China	12982951
USA	China	29603688
USA	China, Hong Kong SAR	9851
USA	China, Hong Kong SAR	912850
USA	Colombia	68710976
USA	Costa Rica	136984
USA	Czechia	2428132
USA	Denmark	18120
USA	Ethiopia	12976
USA	Fiji	24473
USA	France	1192816
USA	France	303624
USA	French Polynesia	182173
USA	Georgia	5824
USA	Germany	634934938
USA	Germany	152930
USA	India	69184
USA	Indonesia	106706
USA	Ireland	284466
USA	Israel	27742
USA	Israel	210342
USA	Italy	359569551
USA	Italy	193917
USA	Japan	90673405
USA	Japan	2147202
USA	Lebanon	73841
USA	Malaysia	51100
USA	Mexico	1310332
USA	Mexico	4949
USA	Nepal	3909
USA	Netherlands	4259867
USA	Netherlands	61259
USA	New Zealand	6708
USA	Nicaragua	7088
USA	Norway	127669498
USA	Other Asia, nes	532802
USA	Other Asia, nes	51871
USA	Panama	74280
USA	Philippines	19743
USA	Philippines	168768
USA	Portugal	25229
USA	Rep. of Korea	91497833
USA	Rep. of Korea	9716
USA	Russian Federation	499802247
USA	Singapore	37393491
USA	South Africa	1508772724
USA	Spain	136752
USA	Sweden	65819
USA	Switzerland	12620330
USA	Switzerland	18674
USA	Thailand	117329
USA	Thailand	562483
USA	Türkiye	27762
USA	United Arab Emirates	23165
USA	United Kingdom	416897753
USA	United Kingdom	391024
USA	Viet Nam	74362
USA	Viet Nam	126350
Venezuela	Argentina	2304
Venezuela	China	169
Venezuela	Germany	573
Venezuela	Japan	1298
Venezuela	Panama	1203
Venezuela	Spain	15528
Venezuela	USA	9858
Venezuela	USA	19986
Viet Nam	Australia	54880
Viet Nam	China	38203
Viet Nam	China, Hong Kong SAR	485811
Viet Nam	China, Hong Kong SAR	3459
Viet Nam	France	289561
Viet Nam	France	876
Viet Nam	Italy	11399
Viet Nam	Japan	9556085
Viet Nam	Japan	32810
Viet Nam	United Kingdom	6474
Viet Nam	USA	353848
Zambia	South Africa	1024.46
Zimbabwe	South Africa	31416.6
Zimbabwe	South Africa	213.82
Zimbabwe	Zambia	64

## Sheet: 2014
source	target	weight
Algeria	China	19767
Algeria	France	7957
Andorra	China	201.982
Andorra	France	855.702
Andorra	Germany	5512.05
Andorra	Italy	536.844
Andorra	Spain	6100.67
Andorra	Spain	13965.9
Angola	Belgium	8911
Angola	China	1897
Angola	France	285
Angola	Germany	1025
Angola	Portugal	11474
Angola	Portugal	78
Angola	Spain	3341
Angola	Switzerland	6
Angola	Türkiye	154
Angola	USA	2048
Antigua and Barbuda	China	42071
Antigua and Barbuda	China, Hong Kong SAR	324
Antigua and Barbuda	USA	1103
Argentina	Austria	127422
Argentina	Belgium	3.63599e+06
Argentina	Canada	6969.34
Argentina	France	3928.25
Argentina	Germany	1.93884e+06
Argentina	Russian Federation	743109
Argentina	South Africa	1.60212e+06
Argentina	United Kingdom	7.80758e+07
Argentina	USA	1.40236e+06
Armenia	China, Hong Kong SAR	220
Armenia	Germany	2215
Armenia	Italy	814
Armenia	Russian Federation	4030
Armenia	United Arab Emirates	361
Aruba	Areas, nes	13380
Aruba	Netherlands	5999
Aruba	Switzerland	5544
Aruba	USA	3672
Aruba	USA	129903
Australia	Australia	34692
Australia	Australia	3527626
Australia	Austria	375172
Australia	Canada	1595
Australia	China	2590187
Australia	China, Hong Kong SAR	550115
Australia	China, Hong Kong SAR	1568004
Australia	Costa Rica	2047
Australia	Denmark	1433
Australia	France	146158
Australia	France	20221
Australia	French Polynesia	6373
Australia	Germany	4171147
Australia	Germany	45448
Australia	India	2090
Australia	Indonesia	17526
Australia	Israel	5622
Australia	Italy	446776
Australia	Italy	9624
Australia	Japan	540681
Australia	Japan	75137
Australia	Jordan	1340
Australia	Netherlands	5492
Australia	New Zealand	1187852
Australia	Other Asia, nes	2060
Australia	Peru	25782
Australia	Philippines	13700
Australia	Russian Federation	219629
Australia	Saudi Arabia	19234
Australia	Singapore	5966
Australia	Singapore	9674
Australia	Spain	10337
Australia	Spain	146987
Australia	Switzerland	578575
Australia	Switzerland	32100
Australia	Thailand	17835
Australia	Thailand	275814
Australia	Türkiye	1046
Australia	United Arab Emirates	47491
Australia	United Kingdom	10652423
Australia	United Kingdom	7538
Australia	USA	17687345
Australia	USA	577198
Australia	Viet Nam	10985
Austria	Australia	6034
Austria	Australia	4259
Austria	Belgium	863132
Austria	Bulgaria	7336
Austria	China	652560
Austria	China, Hong Kong SAR	28209
Austria	Croatia	662
Austria	Czechia	1103695
Austria	Czechia	58
Austria	Finland	1273
Austria	France	1210373
Austria	France	22299
Austria	French Polynesia	44084
Austria	Georgia	415
Austria	Germany	46019727
Austria	Germany	790158
Austria	Greece	62971
Austria	Hungary	178103
Austria	Hungary	5926
Austria	India	2993
Austria	Israel	1568
Austria	Italy	335196
Austria	Italy	449222
Austria	Japan	5299054
Austria	Japan	5094
Austria	Luxembourg	4162
Austria	Netherlands	782481
Austria	Netherlands	3091
Austria	Philippines	8293
Austria	Poland	26544
Austria	Portugal	19357
Austria	Romania	4274
Austria	Slovakia	47379
Austria	Slovakia	7376
Austria	Slovenia	294514
Austria	Spain	9132
Austria	Sweden	972783
Austria	Switzerland	3040041
Austria	Switzerland	1971373
Austria	Thailand	486588
Austria	Thailand	1479
Austria	United Kingdom	6346322
Austria	United Kingdom	12473
Austria	USA	313141
Austria	USA	93379
Bahamas	Areas, nes	47
Bahamas	USA	9191
Bahamas	USA	51942
Bahrain	China	37412
Bahrain	China, Hong Kong SAR	1163743
Bahrain	India	91245
Bahrain	United Kingdom	22230
Bahrain	USA	90
Bahrain	USA	2585
Barbados	China	300
Barbados	China	11416
Barbados	China, Hong Kong SAR	3408
Barbados	France	3939
Barbados	Italy	180
Barbados	Japan	4170
Barbados	Other Asia, nes	557
Barbados	Thailand	966
Barbados	United Kingdom	123
Barbados	USA	6666
Barbados	USA	18650
Belgium	Australia	1855.83
Belgium	Austria	207910
Belgium	China	532975
Belgium	China, Hong Kong SAR	42798.4
Belgium	Croatia	28127.5
Belgium	Czechia	1.30981e+06
Belgium	Egypt	278.059
Belgium	France	6.09706e+06
Belgium	France	87167.1
Belgium	Germany	1.45762e+07
Belgium	Germany	24649.9
Belgium	Greece	37462.7
Belgium	Ireland	115857
Belgium	Italy	511065
Belgium	Italy	1275.02
Belgium	Luxembourg	505841
Belgium	Netherlands	2.33333e+06
Belgium	Netherlands	344.713
Belgium	Poland	7527.01
Belgium	Portugal	306415
Belgium	Rep. of Korea	74241.1
Belgium	Romania	13520.9
Belgium	Spain	95027.9
Belgium	Sweden	240.984
Belgium	Switzerland	6.17865e+06
Belgium	Switzerland	480970
Belgium	United Kingdom	7.07451e+06
Belgium	USA	293069
Belgium	USA	3351.26
Belize	Colombia	22
Belize	USA	120
Benin	Belgium	3143
Benin	China	412
Bermuda	USA	4215
Bolivia (Plurinational State of)	China	227.87
Bolivia (Plurinational State of)	China	51.87
Bolivia (Plurinational State of)	Japan	26.29
Bolivia (Plurinational State of)	USA	40284.6
Bolivia (Plurinational State of)	USA	42.96
Bosnia Herzegovina	China	17496
Bosnia Herzegovina	Croatia	1553
Bosnia Herzegovina	Germany	755
Bosnia Herzegovina	Slovenia	317
Bosnia Herzegovina	United Kingdom	27937
Botswana	China	28.341
Botswana	South Africa	264.215
Botswana	South Africa	6004.76
Botswana	USA	2289.23
Botswana	USA	88.258
Brazil	Austria	4468
Brazil	Austria	48
Brazil	Belgium	2464207
Brazil	China	65805
Brazil	China, Hong Kong SAR	11065
Brazil	Germany	10954649
Brazil	Germany	570
Brazil	Italy	5450853
Brazil	Italy	42
Brazil	Japan	579
Brazil	Netherlands	11101
Brazil	Norway	7375847
Brazil	Peru	63195
Brazil	Russian Federation	41432045
Brazil	South Africa	62719737
Brazil	Spain	8278
Brazil	Spain	788
Brazil	Switzerland	25214259
Brazil	United Kingdom	54190593
Brazil	USA	14840288
Brazil	USA	1865
Brunei Darussalam	China	15
Brunei Darussalam	China	5
Brunei Darussalam	Other Asia, nes	437
Bulgaria	Austria	6945
Bulgaria	Belgium	4373
Bulgaria	China	65919
Bulgaria	China, Hong Kong SAR	27705
Bulgaria	Germany	60930
Bulgaria	Hungary	927
Bulgaria	Italy	14409
Bulgaria	Italy	1013
Bulgaria	Switzerland	170792
Bulgaria	Thailand	838
Bulgaria	Türkiye	115538
Bulgaria	United Kingdom	4985
Bulgaria	USA	4202
Bulgaria	USA	411
Burkina Faso	Mali	11.524
Burundi	Italy	141
Cabo Verde	United Kingdom	681.836
Cameroon	United Arab Emirates	505
Canada	Australia	599
Canada	Austria	35
Canada	Belgium	9714778
Canada	Brazil	2664
Canada	Brazil	2
Canada	Canada	486751
Canada	Canada	22238
Canada	China	504
Canada	China	1823633
Canada	China, Hong Kong SAR	625
Canada	China, Hong Kong SAR	52956
Canada	Czechia	5434
Canada	Denmark	1260
Canada	Eswatini	14696
Canada	France	2118
Canada	France	3355
Canada	French Polynesia	2031
Canada	Germany	5939876
Canada	Germany	15391
Canada	Honduras	200
Canada	India	35
Canada	India	10901
Canada	Indonesia	17027
Canada	Iraq	558
Canada	Israel	23760
Canada	Italy	10967845
Canada	Italy	56068
Canada	Japan	5544621
Canada	Japan	49045
Canada	Lebanon	2867
Canada	Madagascar	423
Canada	Morocco	544
Canada	Netherlands	327
Canada	Norway	19437405
Canada	Other Asia, nes	2564
Canada	Other Asia, nes	551
Canada	Peru	145
Canada	Philippines	129
Canada	Rep. of Korea	547
Canada	Russian Federation	27380114
Canada	South Africa	35836790
Canada	Spain	17724
Canada	Sweden	44
Canada	Sweden	687
Canada	Switzerland	16877692
Canada	Switzerland	63
Canada	Thailand	37632
Canada	Türkiye	4588
Canada	United Arab Emirates	6929
Canada	United Kingdom	43168504
Canada	United Kingdom	6561
Canada	USA	67049855
Canada	USA	2673193
Canada	Viet Nam	11589
Chile	Areas, nes	145.84
Chile	Areas, nes	950.97
Chile	Austria	30190
Chile	Austria	510.24
Chile	China	1369.99
Chile	China	7411.46
Chile	China, Hong Kong SAR	2629.13
Chile	France	4227.65
Chile	Germany	2369.4
Chile	Germany	475.79
Chile	Japan	766.09
Chile	Lithuania	2477.37
Chile	San Marino	3122.89
Chile	Spain	102.31
Chile	Spain	43661.3
Chile	Thailand	1056.16
Chile	United Kingdom	931.15
Chile	USA	9238.37
Chile	USA	8454.24
China	Areas, nes	17362810
China	Areas, nes	399
China	Australia	718877
China	Australia	6656
China	Austria	107022
China	Belgium	48334221
China	China	138189
China	China	662927
China	China, Hong Kong SAR	7150888
China	China, Hong Kong SAR	139684
China	Czechia	1450
China	Denmark	1007
China	France	43891
China	France	27678
China	French Polynesia	627
China	Germany	84824479
China	Germany	861
China	India	1608
China	Ireland	196645
China	Italy	36142844
China	Italy	14446
China	Japan	613455966
China	Japan	29206
China	Netherlands	94884
China	Norway	1673508
China	Other Asia, nes	9791111
China	Other Asia, nes	5670
China	Philippines	2872
China	Portugal	180546
China	Rep. of Korea	2583376
China	Rep. of Korea	8382
China	Russian Federation	335620804
China	Singapore	7451125
China	South Africa	2422346648
China	Spain	855
China	Switzerland	192516343
China	Switzerland	22986
China	Thailand	27937
China	United Kingdom	329112997
China	United Kingdom	44262
China	USA	80734641
China	USA	21319
China, Hong Kong SAR	Australia	825201
China, Hong Kong SAR	Australia	25410
China, Hong Kong SAR	Austria	5866
China, Hong Kong SAR	Belgium	79883
China, Hong Kong SAR	Canada	6547
China, Hong Kong SAR	China	1859068
China, Hong Kong SAR	China	8217609
China, Hong Kong SAR	China, Macao SAR	553382
China, Hong Kong SAR	Colombia	3077
China, Hong Kong SAR	Fiji	6379
China, Hong Kong SAR	France	488842
China, Hong Kong SAR	France	30508
China, Hong Kong SAR	Germany	28170505
China, Hong Kong SAR	Germany	108560
China, Hong Kong SAR	Greece	266
China, Hong Kong SAR	India	91227
China, Hong Kong SAR	India	245295781
China, Hong Kong SAR	Indonesia	10066
China, Hong Kong SAR	Italy	1513985
China, Hong Kong SAR	Italy	125911
China, Hong Kong SAR	Japan	550296566
China, Hong Kong SAR	Japan	2388151
China, Hong Kong SAR	Kuwait	379
China, Hong Kong SAR	Malaysia	52463
China, Hong Kong SAR	Netherlands	63777195
China, Hong Kong SAR	Norway	20162
China, Hong Kong SAR	Other Asia, nes	74115
China, Hong Kong SAR	Other Asia, nes	766593
China, Hong Kong SAR	Philippines	1410
China, Hong Kong SAR	Poland	6250
China, Hong Kong SAR	Qatar	103
China, Hong Kong SAR	Rep. of Korea	1647280
China, Hong Kong SAR	Russian Federation	10738657
China, Hong Kong SAR	Singapore	9557438
China, Hong Kong SAR	Singapore	710059
China, Hong Kong SAR	South Africa	329012197
China, Hong Kong SAR	Spain	17191
China, Hong Kong SAR	Sweden	1418
China, Hong Kong SAR	Switzerland	814948757
China, Hong Kong SAR	Switzerland	13359641
China, Hong Kong SAR	Thailand	296684498
China, Hong Kong SAR	Thailand	80892
China, Hong Kong SAR	Türkiye	14031989
China, Hong Kong SAR	United Arab Emirates	134600062
China, Hong Kong SAR	United Kingdom	594339123
China, Hong Kong SAR	United Kingdom	556059
China, Hong Kong SAR	USA	68781316
China, Hong Kong SAR	USA	1813139
Colombia	Brazil	2688
Colombia	Canada	83254
Colombia	China	186
Colombia	China	4857
Colombia	Colombia	91340
Colombia	Germany	96
Colombia	India	55
Colombia	Italy	4210
Colombia	Japan	3098
Colombia	Mexico	1112
Colombia	Spain	87662
Colombia	Thailand	72
Colombia	United Kingdom	7935
Colombia	USA	16511
Congo	France	506.32
Congo	Switzerland	1010.13
Costa Rica	Belize	49563
Costa Rica	China	125283
Costa Rica	China	960
Costa Rica	France	110510
Costa Rica	Ireland	89912
Costa Rica	Israel	33350
Costa Rica	Spain	34217
Costa Rica	Sweden	116614
Costa Rica	Switzerland	22473
Costa Rica	USA	8778472
Costa Rica	USA	4006
Côte d'Ivoire	Areas, nes	1161.89
Côte d'Ivoire	China	74.659
Côte d'Ivoire	France	1993.82
Côte d'Ivoire	Mali	1983.44
Côte d'Ivoire	Morocco	620.786
Croatia	Areas, nes	1356973
Croatia	Austria	196
Croatia	Austria	1820
Croatia	France	112
Croatia	Germany	2608961
Croatia	Germany	759
Croatia	North Macedonia	42
Croatia	Other Europe, nes	77
Croatia	Slovenia	55415
Croatia	Slovenia	62197
Croatia	Switzerland	1939
Croatia	United Kingdom	108110
Cyprus	China	5019.08
Cyprus	China, Hong Kong SAR	1200.96
Cyprus	Germany	1456.04
Cyprus	Greece	1150.48
Cyprus	Italy	7212.43
Cyprus	Italy	1559.66
Cyprus	United Kingdom	216.546
Cyprus	USA	10897.7
Czechia	Australia	7504
Czechia	Austria	1305464
Czechia	Belgium	7815
Czechia	Belgium	91109
Czechia	China	4361
Czechia	China	137250
Czechia	China, Hong Kong SAR	457
Czechia	Denmark	815
Czechia	France	15208
Czechia	Germany	2162991
Czechia	Germany	18682
Czechia	Hungary	6146
Czechia	Italy	140221
Czechia	Japan	106
Czechia	Japan	177
Czechia	Netherlands	7112034
Czechia	Other Asia, nes	4573
Czechia	Philippines	98
Czechia	Poland	1925
Czechia	Rep. of Korea	34127
Czechia	Russian Federation	14804120
Czechia	Slovakia	46343052
Czechia	Slovakia	230780
Czechia	South Africa	458963
Czechia	Spain	160
Czechia	Switzerland	2850285
Czechia	Thailand	3222
Czechia	United Arab Emirates	328
Czechia	United Kingdom	3768454
Czechia	United Kingdom	80987
Czechia	USA	485501
Czechia	USA	1347
Czechia	Viet Nam	574
Denmark	Australia	1366
Denmark	Australia	9542
Denmark	Austria	62434
Denmark	Austria	2664
Denmark	Belgium	20128
Denmark	Bulgaria	2404
Denmark	China	275
Denmark	China	108502
Denmark	China, Hong Kong SAR	22694
Denmark	Czechia	38553
Denmark	Estonia	18544
Denmark	Finland	8867
Denmark	Finland	1325
Denmark	France	35032
Denmark	French Polynesia	301157
Denmark	Germany	4791675
Denmark	Germany	99694
Denmark	Ghana	1162
Denmark	Greece	2995
Denmark	Hungary	3585
Denmark	India	2573
Denmark	India	8605
Denmark	Indonesia	7659
Denmark	Ireland	668270
Denmark	Italy	1108
Denmark	Italy	12712
Denmark	Japan	25984
Denmark	Japan	21813
Denmark	Latvia	28881
Denmark	Lithuania	23084
Denmark	Lithuania	5836
Denmark	Luxembourg	92
Denmark	Malta	277
Denmark	Netherlands	21047
Denmark	Netherlands	9654
Denmark	Norway	4967
Denmark	Norway	456
Denmark	Philippines	9619
Denmark	Poland	32833
Denmark	Poland	5751
Denmark	Portugal	565
Denmark	Romania	46
Denmark	Slovakia	17175
Denmark	Slovenia	256
Denmark	Spain	10736
Denmark	Spain	1811
Denmark	Sweden	806
Denmark	Sweden	2304
Denmark	Switzerland	1030808
Denmark	Switzerland	23333
Denmark	Thailand	1
Denmark	Türkiye	161
Denmark	United Kingdom	787136
Denmark	United Kingdom	18324
Denmark	USA	446193
Denmark	USA	926
Denmark	Viet Nam	6104
Dominican Rep.	Areas, nes	611.66
Dominican Rep.	China	13564.3
Dominican Rep.	India	194.13
Dominican Rep.	Israel	3151.54
Dominican Rep.	Spain	5166.22
Dominican Rep.	USA	620872
Dominican Rep.	USA	462.237
Ecuador	China	9446
Ecuador	France	63648
Ecuador	Italy	2285
Ecuador	Italy	27993
Ecuador	Spain	96697
Ecuador	Switzerland	1772
Ecuador	USA	4604
Ecuador	USA	1411
Egypt	Germany	59509
Egypt	USA	8372
El Salvador	China	476.54
El Salvador	China, Hong Kong SAR	0.53
El Salvador	Spain	2633.1
El Salvador	USA	95.03
Estonia	Belgium	137853
Estonia	China	192674
Estonia	Finland	256
Estonia	France	1726
Estonia	Germany	1417
Estonia	Italy	149660
Estonia	Other Europe, nes	1973
Estonia	Russian Federation	4576
Estonia	Russian Federation	85
Estonia	South Africa	165
Estonia	Thailand	10
Estonia	Türkiye	674
Estonia	USA	244
Estonia	USA	241
Eswatini	China	2.534
Eswatini	South Africa	32.987
Eswatini	South Africa	1399.35
Ethiopia	China	31613.7
Ethiopia	Germany	24118.5
Ethiopia	Italy	10642.4
Fiji	China, Hong Kong SAR	188006
Finland	Austria	11
Finland	Bulgaria	12879
Finland	Canada	22291
Finland	China	442949
Finland	China, Hong Kong SAR	10495
Finland	Estonia	13093
Finland	France	82006
Finland	France	1572
Finland	Germany	712963
Finland	Germany	3275
Finland	Lithuania	260937
Finland	Netherlands	332
Finland	Norway	43811
Finland	Sweden	590746
Finland	Sweden	3034
Finland	Switzerland	407090
Finland	Thailand	3906
Finland	United Kingdom	190425
Finland	United Kingdom	166
Finland	USA	14236
Finland	USA	11189
France	Albania	119595
France	Areas, nes	48319
France	Areas, nes	6776
France	Australia	1085
France	Austria	270619
France	Austria	5254
France	Belgium	3103970
France	Belgium	24236
France	Brazil	348
France	China	26608
France	China	699877
France	China, Hong Kong SAR	487
France	China, Hong Kong SAR	594238
France	Costa Rica	4124
France	Czechia	693223
France	Dem. People's Rep. of Korea	178128
France	Denmark	125219
France	France	5474
France	France	505
France	French Polynesia	20453
France	Germany	47904243
France	Germany	54673
France	Hungary	15021
France	India	2880
France	India	3631
France	Ireland	1778
France	Italy	34554337
France	Italy	2097
France	Japan	2245394
France	Japan	69365
France	Kuwait	146422
France	Luxembourg	63025
France	Luxembourg	5375
France	Netherlands	559
France	New Caledonia	6935
France	Other Asia, nes	8388
France	Philippines	21
France	Poland	5388
France	Portugal	5312
France	Singapore	154
France	South Africa	1908
France	Spain	9618783
France	Spain	1264
France	Sweden	191
France	Switzerland	33711641
France	Switzerland	6365
France	Thailand	1563
France	United Arab Emirates	1695
France	United Kingdom	23608110
France	United Kingdom	214403
France	United Rep. of Tanzania	5
France	USA	30770499
France	USA	228575
France	Viet Nam	2278
French Polynesia	French Polynesia	7
French Polynesia	USA	630
Gabon	France	260.657
Gabon	Other Asia, nes	569.719
Georgia	China	2608.57
Georgia	Spain	54.4
Germany	Australia	43055.1
Germany	Australia	28236.1
Germany	Austria	7.02885e+07
Germany	Austria	11514.5
Germany	Belgium	4.30262e+08
Germany	Belgium	1926.61
Germany	Brazil	3.63694e+06
Germany	Canada	889333
Germany	Canada	1938.57
Germany	China	2.04551e+06
Germany	China	7.94759e+06
Germany	China, Hong Kong SAR	7.47932e+06
Germany	China, Hong Kong SAR	346071
Germany	Croatia	3.83462e+06
Germany	Cyprus	7.25038e+06
Germany	Czechia	9.50278e+07
Germany	Czechia	2640.12
Germany	Denmark	79953
Germany	Denmark	22492.2
Germany	Dominican Rep.	111.611
Germany	Estonia	223309
Germany	Finland	9957.25
Germany	Finland	756.029
Germany	France	4.90269e+07
Germany	France	47470.4
Germany	French Polynesia	40171.8
Germany	Georgia	159.444
Germany	Greece	2557.74
Germany	Hungary	11198.3
Germany	Hungary	794.561
Germany	India	24866.6
Germany	India	21369.4
Germany	Indonesia	21604.6
Germany	Indonesia	123.569
Germany	Iran	374825
Germany	Ireland	1.66345e+06
Germany	Israel	54972.2
Germany	Italy	3.17739e+07
Germany	Italy	39520.8
Germany	Japan	1.77905e+07
Germany	Japan	250536
Germany	Latvia	769895
Germany	Lithuania	2.78051e+06
Germany	Luxembourg	950281
Germany	Luxembourg	531.479
Germany	Mexico	1.4035e+07
Germany	Netherlands	1.56319e+07
Germany	Netherlands	44092.8
Germany	Norway	5.89996e+07
Germany	Norway	1125.41
Germany	Other Asia, nes	1.67026e+07
Germany	Philippines	9247.73
Germany	Philippines	16938.2
Germany	Poland	6.37697e+06
Germany	Portugal	428187
Germany	Rep. of Korea	3.099e+06
Germany	Rep. of Moldova	19582.3
Germany	Romania	158071
Germany	Russian Federation	3.14165e+08
Germany	Serbia	714884
Germany	Singapore	984341
Germany	Slovakia	906.171
Germany	Slovakia	999.18
Germany	Slovenia	37683.2
Germany	South Africa	6.61974e+08
Germany	Spain	913045
Germany	Spain	1291.49
Germany	Sweden	371005
Germany	Sweden	134.198
Germany	Switzerland	3.97934e+08
Germany	Switzerland	21649.8
Germany	Thailand	21330.9
Germany	Türkiye	707588
Germany	Türkiye	2610.89
Germany	Ukraine	204404
Germany	United Arab Emirates	1060.3
Germany	United Arab Emirates	3313.77
Germany	United Kingdom	6.04074e+08
Germany	United Kingdom	12046
Germany	Uruguay	1347.3
Germany	USA	2.1747e+08
Germany	USA	92280.7
Ghana	China	17.368
Greece	Albania	13314
Greece	Belgium	255148
Greece	Bulgaria	6345
Greece	China	18221
Greece	China, Hong Kong SAR	57432
Greece	France	11
Greece	Germany	99946
Greece	Germany	5264
Greece	Italy	5621
Greece	Italy	1067
Greece	Spain	36812
Greece	Switzerland	48697
Greece	United Kingdom	12037
Greece	United Kingdom	193
Greece	USA	13440
Greenland	Denmark	29.36
Grenada	Areas, nes	17.037
Grenada	USA	594.073
Grenada	USA	352.963
Guatemala	China	6749
Guatemala	Italy	1348
Guatemala	Panama	4844
Guatemala	Spain	3511
Guatemala	USA	14529
Guatemala	USA	1740
Guinea	China	2140
Guinea	Saudi Arabia	162
Honduras	China	149
Honduras	USA	302
Honduras	USA	867
Hungary	Austria	17865
Hungary	Austria	31421
Hungary	China	3665
Hungary	China, Hong Kong SAR	22747
Hungary	Germany	352275
Hungary	Germany	21015
Hungary	India	215
Hungary	Italy	506929
Hungary	Malaysia	228
Hungary	Poland	1287
Hungary	Romania	11338
Hungary	Spain	4009
Hungary	Switzerland	75029
Hungary	Thailand	89
Hungary	United Kingdom	5634
Hungary	USA	11548
Hungary	USA	769
Iceland	China	281
Iceland	Germany	70515
Iceland	Italy	1497
Iceland	USA	28183
Iceland	USA	79
India	Australia	5874
India	Belgium	20116992
India	Canada	29196
India	China	180437
India	China	35465
India	China, Hong Kong SAR	923098
India	China, Hong Kong SAR	2486
India	Czechia	267390
India	Egypt	1322906
India	Germany	22607901
India	Germany	1008
India	Iran	3445871
India	Italy	2933691
India	Japan	4003178
India	Netherlands	1179
India	Other Asia, nes	2326
India	Other Asia, nes	495
India	Rep. of Korea	152460
India	Russian Federation	76151
India	Singapore	152082
India	South Africa	61609568
India	Switzerland	12801888
India	Thailand	559
India	United Arab Emirates	106469
India	United Kingdom	70240361
India	USA	60229514
Indonesia	Australia	4724
Indonesia	Austria	5482
Indonesia	Austria	43639
Indonesia	China	27925
Indonesia	China, Hong Kong SAR	500
Indonesia	Germany	5213
Indonesia	Italy	14126
Indonesia	Japan	48667
Indonesia	Malaysia	357780
Indonesia	Other Asia, nes	435
Indonesia	Rep. of Korea	125899
Indonesia	Singapore	207118
Indonesia	Switzerland	84985
Indonesia	Thailand	12607
Indonesia	USA	129
Iran	India	10696.2
Iran	Other Asia, nes	585974
Iran	Sweden	11063.8
Ireland	Areas, nes	20842.9
Ireland	Areas, nes	817.028
Ireland	Australia	515.458
Ireland	Australia	583.212
Ireland	Belgium	1.84991e+06
Ireland	China	17750.1
Ireland	Germany	1.58623e+08
Ireland	Germany	1000.36
Ireland	Italy	91442.1
Ireland	Japan	28290.4
Ireland	Netherlands	2.70735e+06
Ireland	Russian Federation	1.05058e+06
Ireland	Saudi Arabia	367.995
Ireland	Thailand	40499.4
Ireland	United Arab Emirates	653.622
Ireland	United Kingdom	9.83485e+06
Ireland	United Kingdom	90516.1
Ireland	USA	2.12161e+07
Ireland	USA	10147.1
Ireland	Viet Nam	10726.3
Israel	China	79000
Israel	China, Hong Kong SAR	40000
Israel	Croatia	56000
Israel	Czechia	81000
Israel	France	761000
Israel	Germany	1031000
Israel	Germany	5000
Israel	India	62000
Israel	India	13000
Israel	Italy	25000
Israel	Rep. of Korea	39000
Israel	Russian Federation	1000
Israel	Spain	2000
Israel	Switzerland	664000
Israel	Thailand	8000
Israel	United Kingdom	529000
Israel	USA	4356000
Israel	USA	1000
Italy	Australia	9563
Italy	Austria	1410150
Italy	Austria	1966
Italy	Belgium	6104118
Italy	Belgium	14810
Italy	Brazil	2829
Italy	Bulgaria	85586
Italy	China	1655
Italy	China	1677464
Italy	China, Hong Kong SAR	77771
Italy	Croatia	225290
Italy	Czechia	7336188
Italy	Egypt	98190
Italy	France	3403371
Italy	France	11865
Italy	French Polynesia	2743110
Italy	Germany	50166595
Italy	Germany	192491
Italy	Hungary	1372194
Italy	India	131653
Italy	Ireland	4542
Italy	Japan	11749779
Italy	Japan	399973
Italy	Malaysia	281035
Italy	Netherlands	2013938
Italy	Netherlands	719
Italy	Norway	673936
Italy	Pakistan	2700
Italy	Philippines	42827
Italy	Poland	85119
Italy	Rep. of Korea	26842
Italy	Romania	122222
Italy	Russian Federation	32233460
Italy	Serbia	76816
Italy	South Africa	205685859
Italy	Spain	220364
Italy	Spain	83202
Italy	Sweden	774086
Italy	Switzerland	209641395
Italy	Türkiye	43879
Italy	United Arab Emirates	2969
Italy	United Kingdom	30964836
Italy	United Kingdom	14274
Italy	USA	268784558
Italy	USA	81020
Italy	Viet Nam	108896
Jamaica	China	24501.7
Jamaica	Italy	43.331
Jamaica	Japan	200.314
Jamaica	USA	58185.9
Japan	Australia	105469
Japan	Australia	6488847
Japan	Belgium	3619549
Japan	China	51532336
Japan	China	1867959
Japan	China, Hong Kong SAR	22340
Japan	China, Hong Kong SAR	91146
Japan	Denmark	16856
Japan	France	75216
Japan	French Polynesia	90843
Japan	Germany	66986894
Japan	Germany	39366
Japan	Iceland	2600
Japan	India	5143
Japan	Indonesia	174379
Japan	Israel	3243
Japan	Italy	30932940
Japan	Italy	151548
Japan	Malaysia	129917
Japan	Norway	37570480
Japan	Other Asia, nes	30623085
Japan	Other Asia, nes	42014
Japan	Philippines	2546596
Japan	Philippines	3054
Japan	Rep. of Korea	21851323
Japan	Rep. of Korea	93528
Japan	Russian Federation	579479782
Japan	Singapore	219352
Japan	South Africa	2081811915
Japan	Spain	17518
Japan	Switzerland	125090809
Japan	Thailand	597654
Japan	Thailand	105507
Japan	United Kingdom	165642409
Japan	United Kingdom	32437
Japan	USA	92620063
Japan	USA	358921
Japan	Viet Nam	114053
Japan	Viet Nam	57329
Jordan	Italy	60037
Jordan	Thailand	352
Jordan	USA	2289
Kazakhstan	China	3000
Kazakhstan	Czechia	380
Kazakhstan	Germany	124079
Kazakhstan	Italy	250
Kazakhstan	Japan	1297
Kazakhstan	Other Asia, nes	113
Kazakhstan	Russian Federation	23054
Kazakhstan	Russian Federation	744
Kazakhstan	Spain	177
Kazakhstan	Switzerland	192594
Kazakhstan	Thailand	6576
Kazakhstan	United Kingdom	229
Kazakhstan	United Kingdom	44
Kazakhstan	USA	474
Kazakhstan	USA	2500
Kuwait	China	626
Kuwait	China, Hong Kong SAR	611
Kuwait	Germany	344584
Kuwait	Italy	9990
Kuwait	Lithuania	345
Kuwait	USA	265014
Kuwait	USA	9166
Kyrgyzstan	China	204
Kyrgyzstan	India	427
Kyrgyzstan	Russian Federation	313
Latvia	Belgium	559054
Latvia	China	37884.8
Latvia	China, Hong Kong SAR	22110.2
Latvia	Cyprus	492321
Latvia	Estonia	33024.6
Latvia	Estonia	9002.5
Latvia	Germany	966409
Latvia	Germany	9903.41
Latvia	Italy	1105.24
Latvia	Poland	5796.89
Latvia	Russian Federation	78346.3
Latvia	Spain	59571.7
Latvia	Thailand	4976.91
Latvia	United Kingdom	834.572
Latvia	United Kingdom	24667
Latvia	USA	37.151
Lebanon	China	7366
Lebanon	France	211
Lebanon	Germany	136027
Lebanon	Italy	14387
Lebanon	Switzerland	169890
Lebanon	United Kingdom	75
Lebanon	USA	72821
Lebanon	USA	3454
Lesotho	South Africa	6.911
Lithuania	China	14967
Lithuania	Estonia	8
Lithuania	Germany	7136
Lithuania	Germany	948
Lithuania	Latvia	11465
Lithuania	Philippines	450
Lithuania	Poland	19606
Lithuania	United Kingdom	3578
Luxembourg	Belgium	4021
Luxembourg	China	24140
Luxembourg	China, Hong Kong SAR	1559
Luxembourg	France	55110
Luxembourg	France	6180
Luxembourg	French Polynesia	14179
Luxembourg	Germany	558525
Luxembourg	Germany	1812
Luxembourg	Japan	395
Luxembourg	Netherlands	10790
Luxembourg	Other Europe, nes	245014
Luxembourg	Other Europe, nes	28167
Luxembourg	Philippines	79
Luxembourg	Switzerland	1506561
Madagascar	Canada	10445.5
Madagascar	China	7.944
Madagascar	France	76.978
Madagascar	France	2321.07
Madagascar	Other Europe, nes	66.723
Madagascar	United Kingdom	215.393
Madagascar	USA	6642.41
Malawi	China	175.167
Malawi	South Africa	21.502
Malaysia	Australia	3969
Malaysia	Australia	4127
Malaysia	Canada	3847
Malaysia	China	145493030
Malaysia	China	40242
Malaysia	China, Hong Kong SAR	329059
Malaysia	China, Hong Kong SAR	105620
Malaysia	Germany	436058
Malaysia	Germany	68925
Malaysia	Indonesia	1903
Malaysia	Italy	14749
Malaysia	Japan	4326391
Malaysia	Japan	247634
Malaysia	Other Asia, nes	96416
Malaysia	Philippines	2325
Malaysia	Rep. of Korea	1935
Malaysia	Singapore	27229641
Malaysia	Singapore	109480
Malaysia	Switzerland	3044145
Malaysia	Thailand	35024
Malaysia	Thailand	13658
Malaysia	United Kingdom	18727
Malaysia	USA	1737937
Malaysia	USA	11741
Maldives	China	623
Maldives	Indonesia	818
Maldives	Thailand	24
Maldives	Thailand	71
Malta	Austria	15196
Malta	China	6068
Malta	China, Hong Kong SAR	797
Malta	Germany	423
Malta	India	764
Malta	Israel	641
Malta	Italy	3530
Malta	Japan	660
Malta	Thailand	5802
Malta	USA	1548
Mauritius	Belgium	1293
Mauritius	China	4620
Mauritius	France	4195
Mauritius	Germany	3648
Mauritius	Italy	140072
Mauritius	United Arab Emirates	850665
Mauritius	USA	3798
Mexico	China	408385
Mexico	China, Hong Kong SAR	30081
Mexico	Germany	1700903
Mexico	India	48674
Mexico	Japan	45542
Mexico	Spain	431394
Mexico	Thailand	15443
Mexico	United Kingdom	1773282
Mexico	USA	11929970
Mexico	USA	1536876
Mongolia	Australia	312
Mongolia	China	3540
Mongolia	Germany	1262
Mongolia	Japan	23870
Montenegro	China	1094
Montserrat	Trinidad and Tobago	5
Morocco	Azerbaijan	207
Morocco	China	8255
Morocco	France	68317
Morocco	France	1578
Morocco	Germany	1149
Morocco	Italy	3158
Morocco	Spain	10542
Morocco	USA	622
Mozambique	Portugal	1540
Myanmar	China	3533.2
Namibia	South Africa	5358
Namibia	South Africa	22733
Namibia	USA	93
Nepal	China	6862
Nepal	India	87
Nepal	India	6271
Nepal	Switzerland	77
Netherlands	Australia	29233.9
Netherlands	Austria	828359
Netherlands	Belgium	1.0535e+06
Netherlands	Canada	1697.05
Netherlands	China	784.073
Netherlands	China	205290
Netherlands	China, Hong Kong SAR	46124.7
Netherlands	Denmark	15696.1
Netherlands	Denmark	155722
Netherlands	France	553114
Netherlands	France	14664.8
Netherlands	French Polynesia	1758.18
Netherlands	Germany	1.61937e+07
Netherlands	Germany	186951
Netherlands	Italy	547707
Netherlands	Italy	13662.8
Netherlands	Japan	10206.2
Netherlands	Malaysia	214820
Netherlands	Other Europe, nes	324.261
Netherlands	Other Europe, nes	1.329
Netherlands	Philippines	11.96
Netherlands	Poland	131225
Netherlands	Singapore	204.656
Netherlands	Switzerland	1.37355e+06
Netherlands	Thailand	2594.08
Netherlands	Thailand	100.999
Netherlands	United Kingdom	2.38068e+06
Netherlands	USA	810162
Netherlands	USA	31699.1
New Caledonia	China	24775
New Caledonia	China, Hong Kong SAR	18961
New Caledonia	France	593
New Caledonia	France	5616
New Caledonia	French Polynesia	30645
New Caledonia	Germany	4231
New Caledonia	Italy	705
New Caledonia	Netherlands	88
New Caledonia	Spain	194
New Caledonia	Spain	2948
New Caledonia	USA	46
New Zealand	Australia	157189
New Zealand	Australia	11813.7
New Zealand	Austria	4512.45
New Zealand	China	214357
New Zealand	China, Hong Kong SAR	55744.6
New Zealand	Denmark	30.691
New Zealand	France	5192.64
New Zealand	French Polynesia	15952.9
New Zealand	Germany	875176
New Zealand	Indonesia	802.122
New Zealand	Italy	3297.24
New Zealand	Japan	2.63362e+06
New Zealand	Japan	385.715
New Zealand	Malaysia	1237.61
New Zealand	New Zealand	11564.8
New Zealand	South Africa	2383.14
New Zealand	Switzerland	58073
New Zealand	Thailand	682.675
New Zealand	Türkiye	412.259
New Zealand	United Kingdom	19528.8
New Zealand	United Kingdom	5739.28
New Zealand	USA	991131
New Zealand	USA	7973.94
Nigeria	China	124461
Nigeria	Italy	438
Nigeria	Portugal	1100
Nigeria	Türkiye	31258
Nigeria	United Arab Emirates	293
North Macedonia	Bulgaria	892
North Macedonia	China	382
North Macedonia	France	4738
North Macedonia	Germany	85
North Macedonia	Japan	2109
North Macedonia	Poland	21
North Macedonia	South Africa	38950565
North Macedonia	United Kingdom	796087090
Norway	Australia	2909
Norway	Austria	185
Norway	Belgium	31068
Norway	Canada	6996
Norway	China	263396
Norway	China, Hong Kong SAR	5553
Norway	Czechia	737
Norway	Denmark	11030
Norway	Denmark	9325
Norway	Fiji	241
Norway	France	41871
Norway	French Polynesia	26942
Norway	Germany	7255195
Norway	Germany	78480
Norway	India	3282
Norway	Indonesia	4825
Norway	Italy	180232
Norway	Italy	499
Norway	Japan	1777
Norway	Spain	252
Norway	Sweden	22623
Norway	Sweden	13320
Norway	Switzerland	68895
Norway	Thailand	515
Norway	Thailand	6258
Norway	United Kingdom	8353233
Norway	United Kingdom	20647
Norway	USA	510176
Norway	USA	21589
Oman	United Arab Emirates	132473
Oman	USA	13974
Other Asia, nes	Areas, nes	179947
Other Asia, nes	Australia	67802
Other Asia, nes	Belgium	433511
Other Asia, nes	China	14410112
Other Asia, nes	China	3318012
Other Asia, nes	China, Hong Kong SAR	8785042
Other Asia, nes	China, Hong Kong SAR	123676
Other Asia, nes	Czechia	32910
Other Asia, nes	France	51479
Other Asia, nes	France	6476
Other Asia, nes	Germany	87234019
Other Asia, nes	Indonesia	53925
Other Asia, nes	Italy	119579
Other Asia, nes	Italy	7798
Other Asia, nes	Japan	131151199
Other Asia, nes	Japan	154802
Other Asia, nes	Malaysia	364090
Other Asia, nes	Other Africa, nes	22568
Other Asia, nes	Philippines	36445
Other Asia, nes	Rep. of Korea	1140841
Other Asia, nes	Singapore	10463179
Other Asia, nes	South Africa	14223094
Other Asia, nes	Spain	99
Other Asia, nes	Switzerland	2414049
Other Asia, nes	Switzerland	1256
Other Asia, nes	United Kingdom	7427577
Other Asia, nes	USA	33399713
Other Asia, nes	USA	64498
Pakistan	Switzerland	2589
Pakistan	United Kingdom	28957
Palau	Philippines	19
Palau	Thailand	46
Panama	France	301
Panama	Spain	20865
Panama	USA	41874
Panama	USA	3174
Paraguay	China	13
Paraguay	Germany	19
Paraguay	Spain	359
Paraguay	USA	76
Paraguay	USA	312
Peru	Belgium	49.05
Peru	Brazil	1232.67
Peru	Canada	748.08
Peru	China	9008.91
Peru	Japan	15.53
Peru	Madagascar	0.8
Peru	Spain	3005.66
Peru	USA	1623.53
Philippines	Thailand	6406
Philippines	USA	3535
Poland	Australia	5048
Poland	Belgium	319
Poland	China	2256
Poland	China	525675
Poland	China, Hong Kong SAR	187982
Poland	Czechia	569897
Poland	France	31856
Poland	Germany	1607871
Poland	Germany	279
Poland	Indonesia	2234
Poland	Ireland	703402
Poland	Italy	468939
Poland	Japan	610
Poland	Netherlands	5854073
Poland	Philippines	249
Poland	Romania	24631802
Poland	Spain	49304
Poland	Switzerland	64781
Poland	Thailand	890
Poland	United Kingdom	6152088
Poland	USA	169193
Poland	USA	854
Portugal	Austria	34375
Portugal	China	51294
Portugal	China, Hong Kong SAR	3363
Portugal	France	5014366
Portugal	Germany	1976957
Portugal	Germany	1918
Portugal	Italy	2255553
Portugal	Italy	30155
Portugal	Netherlands	429
Portugal	Spain	216280
Portugal	Spain	71707
Portugal	Switzerland	701
Portugal	United Kingdom	55217
Portugal	United Kingdom	64
Portugal	USA	1023
Qatar	Australia	2258
Qatar	Austria	1869
Qatar	Bahrain	12335
Qatar	Brazil	1970
Qatar	Bulgaria	1437
Qatar	Cambodia	2553
Qatar	Canada	89
Qatar	Chile	67
Qatar	China	336
Qatar	China	913583
Qatar	China, Hong Kong SAR	17948
Qatar	Czechia	581
Qatar	Egypt	441
Qatar	El Salvador	119
Qatar	France	201900
Qatar	Germany	386544
Qatar	Germany	8290
Qatar	Greece	6211
Qatar	India	67210
Qatar	Indonesia	13680
Qatar	Iran	5370
Qatar	Ireland	63
Qatar	Italy	1372
Qatar	Italy	271790
Qatar	Japan	2766
Qatar	Jordan	24525
Qatar	Kuwait	4229
Qatar	Lebanon	307535
Qatar	Malaysia	8005
Qatar	Mali	37
Qatar	Mexico	129
Qatar	Netherlands	16641
Qatar	New Zealand	206
Qatar	Oman	805
Qatar	Other Asia, nes	37827
Qatar	Pakistan	8082
Qatar	Panama	16138
Qatar	Philippines	2436
Qatar	Poland	1949
Qatar	Portugal	4520
Qatar	Rep. of Korea	57741
Qatar	Romania	20926
Qatar	Saudi Arabia	1349
Qatar	Singapore	279
Qatar	South Africa	3777
Qatar	Spain	324327
Qatar	Sri Lanka	39
Qatar	Sweden	59
Qatar	Switzerland	14175
Qatar	Switzerland	3205
Qatar	Syria	136
Qatar	Thailand	189966
Qatar	Tunisia	585
Qatar	Türkiye	29493
Qatar	Uganda	473
Qatar	United Arab Emirates	135854
Qatar	United Kingdom	65887
Qatar	USA	128
Qatar	USA	95315
Qatar	Venezuela	86
Qatar	Viet Nam	65741
Rep. of Korea	Areas, nes	28014
Rep. of Korea	Australia	578
Rep. of Korea	Australia	87002
Rep. of Korea	Belgium	47851110
Rep. of Korea	Brazil	941
Rep. of Korea	Canada	1352
Rep. of Korea	China	54508
Rep. of Korea	China	1111941
Rep. of Korea	China, Hong Kong SAR	7410
Rep. of Korea	China, Hong Kong SAR	107773
Rep. of Korea	Czechia	19862
Rep. of Korea	France	17061
Rep. of Korea	Germany	16425727
Rep. of Korea	Germany	275
Rep. of Korea	India	977
Rep. of Korea	Indonesia	8863
Rep. of Korea	Italy	90059751
Rep. of Korea	Italy	2141
Rep. of Korea	Japan	64427538
Rep. of Korea	Japan	256864
Rep. of Korea	Latvia	336
Rep. of Korea	Mexico	33
Rep. of Korea	Netherlands	68456139
Rep. of Korea	Norway	9190357
Rep. of Korea	Other Asia, nes	336
Rep. of Korea	Russian Federation	3319730
Rep. of Korea	Singapore	368
Rep. of Korea	Singapore	2642
Rep. of Korea	South Africa	201596321
Rep. of Korea	Spain	93738
Rep. of Korea	Switzerland	23594131
Rep. of Korea	Thailand	564
Rep. of Korea	United Kingdom	195982963
Rep. of Korea	USA	52764259
Rep. of Korea	USA	14323
Rep. of Korea	Venezuela	24
Rep. of Moldova	Russian Federation	24852
Rep. of Moldova	Thailand	764
Russian Federation	Armenia	184
Russian Federation	Belarus	724769
Russian Federation	Belarus	4589
Russian Federation	Belgium	485537
Russian Federation	China	1170507
Russian Federation	China, Hong Kong SAR	5785
Russian Federation	France	168
Russian Federation	Germany	104906
Russian Federation	Germany	17590
Russian Federation	India	6019
Russian Federation	Indonesia	84
Russian Federation	Italy	6304
Russian Federation	Italy	75922
Russian Federation	Kazakhstan	4179546
Russian Federation	Netherlands	11456
Russian Federation	Other Asia, nes	315
Russian Federation	Other Europe, nes	433762
Russian Federation	Other Europe, nes	11743
Russian Federation	Spain	175
Russian Federation	Switzerland	2346
Russian Federation	Thailand	2308
Russian Federation	Ukraine	430842
Russian Federation	United Kingdom	142191
Russian Federation	United Kingdom	1832
Russian Federation	USA	106537
Russian Federation	USA	331261
Rwanda	China	514.189
Rwanda	Kenya	45.543
Rwanda	Uganda	44.074
Rwanda	United Arab Emirates	182.207
Saint Kitts and Nevis	USA	23
Saint Lucia	USA	1019
Samoa	China	711
Saudi Arabia	Belgium	243302
Saudi Arabia	Egypt	651205
Saudi Arabia	Germany	37349
Saudi Arabia	Italy	69629
Saudi Arabia	United Arab Emirates	2606688
Saudi Arabia	USA	33080
Senegal	China	9385
Senegal	France	85
Senegal	Morocco	22786
Senegal	United Arab Emirates	3153
Serbia	Austria	573
Serbia	Austria	607
Serbia	Belgium	84867
Serbia	China	14929
Serbia	Germany	1370493
Serbia	Slovenia	1841
Serbia	Spain	8215
Serbia	Switzerland	232
Serbia	Thailand	1142
Serbia	USA	95
Seychelles	India	3167.12
Seychelles	Italy	3184.48
Singapore	Australia	123451
Singapore	Australia	101921
Singapore	Austria	1194.03
Singapore	Brazil	821.29
Singapore	Brunei Darussalam	10342.7
Singapore	China	182632
Singapore	China	53046.7
Singapore	China, Hong Kong SAR	4.27301e+06
Singapore	China, Hong Kong SAR	553666
Singapore	Czechia	5285.48
Singapore	Denmark	14714.5
Singapore	Denmark	1970.31
Singapore	France	157940
Singapore	France	76708.5
Singapore	French Polynesia	20885.2
Singapore	Germany	8.16206e+07
Singapore	Germany	1173.5
Singapore	Indonesia	214508
Singapore	Ireland	17087.6
Singapore	Italy	23270.9
Singapore	Italy	1824.21
Singapore	Japan	1.87334e+07
Singapore	Japan	557166
Singapore	Malaysia	258681
Singapore	Malaysia	91536.7
Singapore	Other Asia, nes	1.10273e+07
Singapore	Philippines	373443
Singapore	Rep. of Korea	32.378
Singapore	Switzerland	920104
Singapore	Thailand	14482.3
Singapore	Thailand	18040
Singapore	Türkiye	769.17
Singapore	Ukraine	1180.61
Singapore	United Kingdom	192987
Singapore	United Kingdom	129703
Singapore	USA	1.45177e+08
Singapore	USA	149580
Slovakia	Areas, nes	91.667
Slovakia	Austria	510718
Slovakia	China	11345.4
Slovakia	China	18733.2
Slovakia	China, Hong Kong SAR	195.29
Slovakia	Czechia	771975
Slovakia	Czechia	102697
Slovakia	France	36509.9
Slovakia	Germany	7.71836e+07
Slovakia	Germany	12356.4
Slovakia	Italy	52741.5
Slovakia	Japan	17667.7
Slovakia	Other Asia, nes	3772.94
Slovakia	Other Europe, nes	2.28822e+06
Slovakia	Poland	59207.3
Slovakia	Poland	3489.97
Slovakia	Singapore	2.657
Slovakia	Slovakia	3.98066e+06
Slovakia	Spain	52303.1
Slovakia	Switzerland	32639.9
Slovakia	United Kingdom	8.592e+06
Slovakia	USA	268.357
Slovakia	USA	2049.88
Slovenia	Austria	672810
Slovenia	Belgium	231
Slovenia	China	6238
Slovenia	Czechia	5389
Slovenia	Germany	292258
Slovenia	Germany	12930
Slovenia	Italy	6888
Slovenia	Italy	744
Slovenia	Switzerland	5252
Slovenia	Thailand	46
Slovenia	United Kingdom	410430
Slovenia	USA	31010
South Africa	Areas, nes	3985.71
South Africa	Australia	7503.77
South Africa	China	151559
South Africa	China, Hong Kong SAR	14665
South Africa	Czechia	1073.94
South Africa	Dem. Rep. of the Congo	441.68
South Africa	Denmark	433.574
South Africa	Finland	140.84
South Africa	France	75.993
South Africa	Germany	1.88907e+07
South Africa	India	11.33
South Africa	Indonesia	79.309
South Africa	Japan	1485.32
South Africa	Kenya	51.583
South Africa	Lesotho	81.243
South Africa	Malaysia	4677.02
South Africa	Other Asia, nes	2054.57
South Africa	Other Asia, nes	1963.29
South Africa	Rep. of Korea	2377.24
South Africa	South Africa	5.13488e+07
South Africa	Spain	427.863
South Africa	Switzerland	8.09035e+07
South Africa	Thailand	245125
South Africa	United Arab Emirates	103.627
South Africa	United Kingdom	7.03043e+07
South Africa	USA	94675.2
South Africa	USA	1144.32
Spain	Australia	23717.8
Spain	Australia	54440.3
Spain	Austria	2365.31
Spain	Belgium	158551
Spain	Belgium	236.451
Spain	China	1017.54
Spain	China	392916
Spain	China, Hong Kong SAR	183184
Spain	Croatia	1464.67
Spain	Czechia	29595.2
Spain	Czechia	11.955
Spain	Finland	71018
Spain	France	4.25135e+06
Spain	France	20037.2
Spain	French Polynesia	3783.91
Spain	Germany	9.49447e+06
Spain	Germany	4251.92
Spain	Greece	551.435
Spain	Italy	820470
Spain	Italy	20397.2
Spain	Japan	87588.1
Spain	Mexico	5.832
Spain	Netherlands	12060.8
Spain	Netherlands	3026.84
Spain	Oceania, nes	21.081
Spain	Other Europe, nes	1929.6
Spain	Other Europe, nes	40770.2
Spain	Poland	13006.3
Spain	Portugal	32017.4
Spain	Portugal	18226.6
Spain	Switzerland	868746
Spain	Thailand	14564.1
Spain	United Kingdom	4.72591e+07
Spain	United Kingdom	19339.8
Spain	USA	870995
Spain	USA	11782.5
Spain	Venezuela	90.396
Spain	Viet Nam	29.756
Sri Lanka	China	5708
Sri Lanka	China, Hong Kong SAR	521702
Sri Lanka	Italy	436
Sri Lanka	USA	43422
State of Palestine	Jordan	158
Sudan	Germany	7407.83
Sweden	Austria	1.13465e+06
Sweden	China	435572
Sweden	China, Hong Kong SAR	292.134
Sweden	China, Hong Kong SAR	193831
Sweden	Czechia	17382
Sweden	Denmark	40314.5
Sweden	Denmark	3797.75
Sweden	Finland	876.403
Sweden	France	794021
Sweden	France	24685.4
Sweden	Germany	5.17312e+06
Sweden	Germany	21033.7
Sweden	India	876.403
Sweden	Italy	2191.01
Sweden	Japan	2044.94
Sweden	Japan	17674.1
Sweden	Netherlands	11247.2
Sweden	Norway	2.29004e+06
Sweden	Romania	1752.81
Sweden	Russian Federation	146.067
Sweden	Switzerland	813448
Sweden	Thailand	146.067
Sweden	Türkiye	146.067
Sweden	United Kingdom	6.9176e+06
Sweden	United Kingdom	7011.23
Sweden	USA	138910
Sweden	USA	5258.42
Switzerland	Australia	508960
Switzerland	Australia	2495.55
Switzerland	Austria	75607.2
Switzerland	Austria	4865.44
Switzerland	Belgium	4.03425e+06
Switzerland	Belgium	118679
Switzerland	Canada	1.73338e+07
Switzerland	Canada	62647.6
Switzerland	China	313.582
Switzerland	China	244315
Switzerland	China, Hong Kong SAR	6.40631e+06
Switzerland	China, Hong Kong SAR	9.50731e+06
Switzerland	Colombia	1.81523e+07
Switzerland	Czechia	1.09364e+07
Switzerland	Czechia	99.429
Switzerland	Denmark	4852.33
Switzerland	France	2.59588e+07
Switzerland	France	1.5361e+06
Switzerland	French Polynesia	5410.66
Switzerland	Germany	3.32421e+08
Switzerland	Germany	2.54843e+06
Switzerland	Greece	1052.19
Switzerland	India	601951
Switzerland	Indonesia	517.903
Switzerland	Ireland	163.893
Switzerland	Israel	38629.6
Switzerland	Italy	1.33967e+08
Switzerland	Italy	5.40244e+06
Switzerland	Japan	9.5275e+07
Switzerland	Japan	12643.8
Switzerland	Luxembourg	45006.2
Switzerland	Malaysia	37647.4
Switzerland	Malaysia	40.427
Switzerland	Netherlands	536.477
Switzerland	Other Asia, nes	5.92343e+06
Switzerland	Philippines	302.656
Switzerland	Poland	1390.91
Switzerland	Qatar	191412
Switzerland	Russian Federation	2.50183e+08
Switzerland	Serbia	711203
Switzerland	Singapore	2.60225e+07
Switzerland	Singapore	1.13638e+06
Switzerland	South Africa	3.49125e+08
Switzerland	South Africa	751.724
Switzerland	Spain	9.88672e+06
Switzerland	Spain	6360.15
Switzerland	Sweden	30343.2
Switzerland	Thailand	8956.22
Switzerland	Thailand	1434.61
Switzerland	Türkiye	181857
Switzerland	United Arab Emirates	725497
Switzerland	United Arab Emirates	3.38618e+06
Switzerland	United Kingdom	1.18231e+08
Switzerland	United Kingdom	4.06077e+06
Switzerland	USA	2.24471e+08
Switzerland	USA	1.20763e+07
Thailand	Australia	53
Thailand	Australia	18
Thailand	Austria	5346
Thailand	China	25144
Thailand	China	227494
Thailand	China, Hong Kong SAR	2507265
Thailand	China, Hong Kong SAR	70831
Thailand	Czechia	6486
Thailand	Denmark	2064
Thailand	France	9603
Thailand	France	30529
Thailand	Germany	5576888
Thailand	India	54501
Thailand	Italy	944922
Thailand	Italy	4453
Thailand	Japan	38752638
Thailand	Japan	28226
Thailand	Lao People's Dem. Rep.	241020
Thailand	Myanmar	2128
Thailand	New Zealand	402938
Thailand	Other Asia, nes	3250
Thailand	Philippines	104
Thailand	Singapore	14452
Thailand	Spain	110374
Thailand	Switzerland	434513
Thailand	Thailand	30215
Thailand	Thailand	172450
Thailand	Türkiye	29146
Thailand	United Kingdom	462373
Thailand	United Kingdom	16
Thailand	USA	4548046
Thailand	USA	7036
Tonga	New Zealand	76
Trinidad and Tobago	Canada	649.886
Trinidad and Tobago	China	1799.71
Trinidad and Tobago	USA	3470.53
Trinidad and Tobago	USA	1304.77
Tunisia	France	3444
Türkiye	Austria	653883
Türkiye	China	75000
Türkiye	France	4739
Türkiye	Germany	378324
Türkiye	Germany	2114
Türkiye	Italy	329149
Türkiye	Japan	94230
Türkiye	Nepal	760
Türkiye	Switzerland	125460
Türkiye	United Arab Emirates	253
Türkiye	United Kingdom	2275893
Türkiye	USA	569955
Uganda	Ethiopia	48
Ukraine	China	9776
Ukraine	Cyprus	434
Ukraine	Czechia	280234
Ukraine	France	6229
Ukraine	Germany	1026398
Ukraine	Italy	553
Ukraine	Japan	3208
Ukraine	Russian Federation	599366
Ukraine	Thailand	87
Ukraine	United Kingdom	213458
Ukraine	USA	216
Ukraine	USA	1132
United Arab Emirates	Albania	95.575
United Arab Emirates	Australia	151527
United Arab Emirates	Australia	411.436
United Arab Emirates	Canada	2065.18
United Arab Emirates	China	48265.7
United Arab Emirates	China, Hong Kong SAR	766.78
United Arab Emirates	France	10389.4
United Arab Emirates	Germany	21447.7
United Arab Emirates	Greece	1094.89
United Arab Emirates	India	16891.1
United Arab Emirates	India	4320.49
United Arab Emirates	Indonesia	414.159
United Arab Emirates	Italy	387698
United Arab Emirates	Italy	31730.1
United Arab Emirates	Japan	8.12422e+06
United Arab Emirates	Lebanon	2319.67
United Arab Emirates	Netherlands	42927.5
United Arab Emirates	Pakistan	14.976
United Arab Emirates	Poland	255.412
United Arab Emirates	Qatar	805.718
United Arab Emirates	Saudi Arabia	966.099
United Arab Emirates	South Africa	2.14899e+07
United Arab Emirates	South Africa	17905.7
United Arab Emirates	Spain	2.09875e+06
United Arab Emirates	Suriname	480411
United Arab Emirates	Switzerland	1.29043e+07
United Arab Emirates	Switzerland	210544
United Arab Emirates	Syria	664.125
United Arab Emirates	Thailand	2722.94
United Arab Emirates	Türkiye	14429.4
United Arab Emirates	United Kingdom	150114
United Arab Emirates	United Kingdom	12963.6
United Arab Emirates	USA	612493
United Arab Emirates	USA	13452.1
United Arab Emirates	Viet Nam	239.891
United Arab Emirates	Zimbabwe	2.3246e+06
United Kingdom	Australia	915236
United Kingdom	Australia	5293
United Kingdom	Austria	379254
United Kingdom	Austria	4466
United Kingdom	Belgium	132993711
United Kingdom	Belgium	3616
United Kingdom	Canada	43754584
United Kingdom	Canada	1439
United Kingdom	China	141786
United Kingdom	China	2244927
United Kingdom	China, Hong Kong SAR	3985
United Kingdom	China, Hong Kong SAR	116942
United Kingdom	Colombia	12507
United Kingdom	Côte d'Ivoire	6310
United Kingdom	Czechia	68209
United Kingdom	Czechia	12568
United Kingdom	Denmark	1851
United Kingdom	Denmark	18874
United Kingdom	France	564788
United Kingdom	France	81937
United Kingdom	French Polynesia	8168
United Kingdom	Georgia	1657279
United Kingdom	Germany	92041973
United Kingdom	Germany	416016
United Kingdom	India	3385659
United Kingdom	Indonesia	252678
United Kingdom	Ireland	17761828
United Kingdom	Ireland	3592
United Kingdom	Israel	31658
United Kingdom	Israel	1350
United Kingdom	Italy	103400157
United Kingdom	Italy	159428
United Kingdom	Japan	26524230
United Kingdom	Japan	419061
United Kingdom	Kenya	966029
United Kingdom	Netherlands	3392
United Kingdom	Netherlands	9673
United Kingdom	Norway	57987562
United Kingdom	Other Asia, nes	2464808
United Kingdom	Peru	25502
United Kingdom	Philippines	5543
United Kingdom	Qatar	173290
United Kingdom	Rep. of Korea	3565996
United Kingdom	Russian Federation	32273553
United Kingdom	Singapore	79994
United Kingdom	South Africa	936861391
United Kingdom	Spain	4715243
United Kingdom	Spain	20316
United Kingdom	Sweden	59
United Kingdom	Switzerland	1205577200
United Kingdom	Switzerland	2959
United Kingdom	Thailand	15549
United Kingdom	Thailand	21660
United Kingdom	Türkiye	246847
United Kingdom	Türkiye	1337
United Kingdom	United Arab Emirates	7985660
United Kingdom	United Kingdom	222338
United Kingdom	United Kingdom	3779
United Kingdom	USA	387374293
United Kingdom	USA	434067
United Rep. of Tanzania	China	4130
United Rep. of Tanzania	Egypt	1
United Rep. of Tanzania	India	6
United Rep. of Tanzania	South Africa	1894
United Rep. of Tanzania	USA	58
Uruguay	Brazil	3138
Uruguay	China	11715
Uruguay	Germany	266
Uruguay	Spain	161
Uruguay	United Kingdom	104
Uruguay	USA	46257
USA	Argentina	329862
USA	Australia	23510591
USA	Australia	991375
USA	Austria	5271034
USA	Austria	4691
USA	Belarus	423599
USA	Belgium	96306910
USA	Brazil	2853838
USA	Brazil	6319
USA	Canada	107093842
USA	Canada	764503
USA	China	18777038
USA	China	24333011
USA	China, Hong Kong SAR	1200914
USA	China, Hong Kong SAR	949508
USA	Colombia	55813531
USA	Costa Rica	48950
USA	Czechia	3809931
USA	Denmark	24277
USA	Finland	12976
USA	France	5249104
USA	France	2676518
USA	French Polynesia	168120
USA	Germany	357528603
USA	Germany	233033
USA	India	109236
USA	India	132388
USA	Indonesia	166867
USA	Ireland	264069
USA	Ireland	3271
USA	Israel	69120
USA	Israel	22277
USA	Italy	686976855
USA	Italy	1061589
USA	Japan	35742415
USA	Japan	1618743
USA	Lao People's Dem. Rep.	19952
USA	Mexico	2235612
USA	Mexico	3870
USA	Netherlands	17230
USA	Nicaragua	7432
USA	Norway	117890395
USA	Other Asia, nes	851012
USA	Other Asia, nes	25523
USA	Peru	3444
USA	Philippines	91549
USA	Portugal	29781
USA	Rep. of Korea	191354164
USA	Rep. of Korea	17644
USA	Russian Federation	547357027
USA	Singapore	93102362
USA	South Africa	1406347243
USA	Spain	119855
USA	Switzerland	443378696
USA	Switzerland	20329
USA	Thailand	477860
USA	Türkiye	28250
USA	Türkiye	2538
USA	United Arab Emirates	40801
USA	United Kingdom	631281448
USA	United Kingdom	91252
USA	Uruguay	4413
USA	Venezuela	20625
USA	Viet Nam	199786
Viet Nam	Australia	33092
Viet Nam	China	156490
Viet Nam	China, Hong Kong SAR	262886
Viet Nam	China, Hong Kong SAR	37807
Viet Nam	France	34324
Viet Nam	Germany	7631
Viet Nam	India	1497
Viet Nam	Italy	22102
Viet Nam	Japan	10838779
Viet Nam	Japan	153094
Viet Nam	Other Asia, nes	5440
Viet Nam	Thailand	8466
Viet Nam	United Kingdom	5734
Viet Nam	USA	718816
Zambia	South Africa	345.473
Zimbabwe	China	150
Zimbabwe	South Africa	2414.32

## Sheet: 2015
source	target	weight
Algeria	Canada	1381
Algeria	China	195858
Algeria	France	32
Algeria	Germany	1179
Algeria	Spain	415
Algeria	United Kingdom	245
Andorra	El Salvador	139.843
Andorra	France	2872.18
Andorra	Spain	6456.48
Andorra	Spain	47599.2
Angola	Denmark	126.67
Angola	Portugal	8070.95
Angola	Portugal	4037.74
Angola	Spain	6100.83
Angola	USA	138.6
Antigua and Barbuda	China	35445
Antigua and Barbuda	Switzerland	91
Antigua and Barbuda	USA	1008
Antigua and Barbuda	USA	5305
Argentina	Austria	12560.7
Argentina	Belgium	2.90731e+06
Argentina	Czechia	29116.6
Argentina	Germany	1.14923e+06
Argentina	South Africa	8.82806e+06
Argentina	Thailand	4319.74
Argentina	United Kingdom	5.09802e+07
Argentina	USA	5.63113e+06
Armenia	China	2518
Armenia	China, Hong Kong SAR	5046
Armenia	Germany	99
Armenia	Italy	71
Armenia	Russian Federation	211519
Armenia	United Arab Emirates	436
Armenia	United Kingdom	7403
Aruba	Areas, nes	10799
Aruba	Areas, nes	134445
Australia	Australia	47544
Australia	Australia	1738658
Australia	Austria	181494
Australia	Belgium	1172
Australia	Canada	679113
Australia	China	2182093
Australia	China, Hong Kong SAR	42572
Australia	China, Hong Kong SAR	1461557
Australia	Denmark	4595
Australia	France	1232
Australia	France	10232
Australia	French Polynesia	58929
Australia	Germany	3886551
Australia	Germany	3357
Australia	India	7503
Australia	Indonesia	28408
Australia	Italy	275915
Australia	Italy	6917
Australia	Japan	526219
Australia	Japan	10805
Australia	New Zealand	523142
Australia	New Zealand	56751
Australia	Philippines	2931
Australia	Rep. of Korea	3280
Australia	Russian Federation	151218
Australia	Singapore	4548
Australia	South Africa	80161
Australia	Spain	8472
Australia	Spain	6209
Australia	Switzerland	4981664
Australia	Thailand	169333
Australia	Türkiye	1105
Australia	United Arab Emirates	673163
Australia	United Kingdom	23320382
Australia	United Kingdom	13109
Australia	USA	8959312
Australia	USA	321074
Australia	Viet Nam	9221
Austria	Algeria	512
Austria	Australia	1173
Austria	Belgium	551548
Austria	Belgium	152
Austria	Bulgaria	59
Austria	Canada	154
Austria	China	662444
Austria	China, Hong Kong SAR	33162
Austria	Croatia	1561
Austria	Czechia	200751
Austria	Denmark	10174
Austria	France	1457221
Austria	France	48038
Austria	French Polynesia	12393
Austria	Germany	41118187
Austria	Germany	1028223
Austria	Greece	39944
Austria	Hungary	23703
Austria	Hungary	15766
Austria	India	74
Austria	Ireland	962
Austria	Italy	312137
Austria	Italy	76962
Austria	Japan	30962673
Austria	Japan	12814
Austria	Netherlands	108265
Austria	Netherlands	6826
Austria	Philippines	83
Austria	Poland	10436
Austria	Portugal	6812
Austria	Romania	526
Austria	Slovakia	37512
Austria	Slovakia	42230
Austria	Slovenia	19659
Austria	Slovenia	2073
Austria	Spain	83
Austria	Sweden	899557
Austria	Switzerland	1295851
Austria	Switzerland	12928
Austria	Thailand	927301
Austria	Thailand	3581
Austria	United Kingdom	7078458
Austria	United Kingdom	3800
Austria	USA	60000
Austria	USA	28529
Austria	Viet Nam	805384
Austria	Viet Nam	935
Azerbaijan	China	284.27
Azerbaijan	United Kingdom	2507.87
Bahamas	USA	4521
Bahamas	USA	130492
Bahrain	China	1662.55
Bahrain	India	10688.7
Bahrain	India	77610.6
Bahrain	United Kingdom	5158.13
Bahrain	USA	1738.16
Bangladesh	India	302
Bangladesh	Other Europe, nes	1177
Bangladesh	Rep. of Korea	13308
Bangladesh	Singapore	117
Barbados	China	905653
Barbados	China, Hong Kong SAR	1617
Barbados	Dominican Rep.	178
Barbados	Germany	1290
Barbados	Italy	213
Barbados	Other Asia, nes	18498
Barbados	Switzerland	87
Barbados	Thailand	243
Barbados	United Kingdom	237
Barbados	USA	2976
Barbados	USA	1538
Belgium	Austria	121248
Belgium	Azerbaijan	37650.7
Belgium	Brazil	347.231
Belgium	China	206661
Belgium	Colombia	269488
Belgium	Czechia	299160
Belgium	Estonia	43254.7
Belgium	France	962683
Belgium	France	96626.4
Belgium	Germany	1.20513e+07
Belgium	Germany	14121.8
Belgium	India	272.253
Belgium	Indonesia	1194.95
Belgium	Italy	217863
Belgium	Italy	759.648
Belgium	Latvia	288229
Belgium	Luxembourg	25454.2
Belgium	Netherlands	285571
Belgium	Netherlands	11.768
Belgium	Poland	297408
Belgium	Portugal	233594
Belgium	Rep. of Korea	5285.61
Belgium	Slovakia	19759
Belgium	Spain	31048.8
Belgium	Spain	196.985
Belgium	Sweden	44.788
Belgium	Switzerland	2.20102e+07
Belgium	Switzerland	452.745
Belgium	Thailand	759.936
Belgium	Türkiye	93.38
Belgium	United Arab Emirates	1653.06
Belgium	United Kingdom	4.22136e+06
Belgium	United Kingdom	73.027
Belgium	USA	2.86104e+07
Belgium	USA	8105.86
Benin	Belgium	4196.76
Bermuda	Switzerland	7200
Bermuda	USA	53
Bermuda	USA	703
Bolivia (Plurinational State of)	Brazil	88.65
Bolivia (Plurinational State of)	China	4391.52
Bolivia (Plurinational State of)	China	323.71
Bolivia (Plurinational State of)	Germany	796.26
Bolivia (Plurinational State of)	USA	50928.7
Bosnia Herzegovina	China	12658
Bosnia Herzegovina	Germany	662
Bosnia Herzegovina	Italy	114
Bosnia Herzegovina	Slovenia	2081
Bosnia Herzegovina	Slovenia	87
Bosnia Herzegovina	United Kingdom	17253
Botswana	China	1653.22
Botswana	Netherlands	11.674
Botswana	South Africa	7080.02
Botswana	Thailand	9.695
Botswana	USA	147.9
Brazil	Austria	212346
Brazil	Austria	1010
Brazil	Belgium	23376641
Brazil	Bulgaria	725
Brazil	China	11162
Brazil	China, Hong Kong SAR	44818
Brazil	Czechia	22867
Brazil	Germany	5702187
Brazil	Germany	3227
Brazil	Italy	9538077
Brazil	Italy	35
Brazil	Japan	1428
Brazil	Norway	2816074
Brazil	Peru	34992
Brazil	Rep. of Korea	44
Brazil	Russian Federation	68178870
Brazil	South Africa	45084321
Brazil	Sweden	133
Brazil	Switzerland	4330
Brazil	Thailand	66
Brazil	United Kingdom	7958196
Brazil	USA	5440555
Brazil	USA	12457
Brunei Darussalam	Germany	3552
Brunei Darussalam	Indonesia	58
Brunei Darussalam	Singapore	161
Brunei Darussalam	Switzerland	139
Bulgaria	Austria	100786
Bulgaria	China	87152
Bulgaria	China, Hong Kong SAR	22257
Bulgaria	Germany	18600
Bulgaria	Netherlands	4080
Bulgaria	Spain	1314
Bulgaria	United Kingdom	1216652
Bulgaria	USA	690
Burkina Faso	China	803.111
Burkina Faso	Mali	132.917
Burkina Faso	Senegal	43.114
Cabo Verde	Italy	23.159
Cabo Verde	Netherlands	142.923
Cameroon	USA	174
Canada	Argentina	35.993
Canada	Australia	234.737
Canada	Belgium	6.01521e+06
Canada	Brazil	18.779
Canada	Brazil	4197.1
Canada	Canada	426375
Canada	Canada	30449.3
Canada	China	2865.36
Canada	China	1.28487e+06
Canada	China, Hong Kong SAR	503.903
Canada	China, Hong Kong SAR	48427.8
Canada	Czechia	9681.34
Canada	Denmark	932.689
Canada	France	6783.9
Canada	France	31126.2
Canada	French Polynesia	1260.54
Canada	Germany	1.68675e+06
Canada	Germany	47715.8
Canada	Greece	13716.5
Canada	India	11114
Canada	Indonesia	22217.1
Canada	Ireland	57.902
Canada	Israel	8679.02
Canada	Italy	5.17153e+06
Canada	Italy	11100.7
Canada	Japan	690892
Canada	Japan	27635.6
Canada	Madagascar	786.37
Canada	Malaysia	118.151
Canada	Morocco	267.6
Canada	Netherlands	3758.14
Canada	Norway	8.8195e+06
Canada	Other Asia, nes	13371.4
Canada	Philippines	21.126
Canada	Rep. of Korea	40.688
Canada	Russian Federation	3.61054e+07
Canada	South Africa	4.90587e+07
Canada	South Africa	59.467
Canada	Spain	10900.4
Canada	Sweden	1158.82
Canada	Sweden	1987.44
Canada	Switzerland	5.75324e+07
Canada	Switzerland	27696.6
Canada	Thailand	19940.9
Canada	Ukraine	249.604
Canada	United Arab Emirates	2021.09
Canada	United Kingdom	1.50954e+07
Canada	United Kingdom	426.439
Canada	USA	5.83857e+07
Canada	USA	2.21647e+06
Canada	Viet Nam	11997.4
Chile	Areas, nes	1864
Chile	Australia	532.16
Chile	Austria	8876.88
Chile	China	5732.52
Chile	Germany	30939.7
Chile	Italy	1806.23
Chile	Japan	2635.64
Chile	Mexico	15724.6
Chile	Spain	65397.6
Chile	Switzerland	2352.82
Chile	Thailand	799.38
Chile	USA	8701.02
Chile	USA	14726.7
China	Areas, nes	4361926
China	Australia	598129
China	Australia	40612
China	Austria	274847
China	Austria	1891
China	Belgium	39555743
China	Belgium	1240
China	Bulgaria	183
China	Canada	183417
China	China	583762
China	China	568298
China	China, Hong Kong SAR	20586111
China	China, Hong Kong SAR	370129
China	Costa Rica	1445
China	Czechia	2388
China	Czechia	1141
China	Denmark	449
China	France	32411
China	France	151394
China	French Polynesia	37414
China	Germany	49308076
China	Germany	2554
China	India	216
China	Ireland	83530
China	Italy	10126202
China	Italy	57262
China	Japan	361603707
China	Japan	5008
China	Malaysia	23248
China	Netherlands	9210
China	Other Asia, nes	25730657
China	Other Asia, nes	3223
China	Portugal	129435
China	Rep. of Korea	1560706
China	Rep. of Korea	1473
China	Russian Federation	126732375
China	Singapore	6328609
China	South Africa	2288529824
China	Spain	81291
China	Switzerland	124701695
China	Switzerland	43102
China	Thailand	1292
China	United Kingdom	243807141
China	United Kingdom	64091
China	USA	34930493
China	USA	24237
China	Viet Nam	138
China, Hong Kong SAR	Armenia	4.22671e+06
China, Hong Kong SAR	Australia	104525
China, Hong Kong SAR	Austria	6241.04
China, Hong Kong SAR	Canada	4872.06
China, Hong Kong SAR	China	1.40352e+06
China, Hong Kong SAR	China	7.5367e+06
China, Hong Kong SAR	China, Macao SAR	690905
China, Hong Kong SAR	Denmark	4150.67
China, Hong Kong SAR	France	68252.3
China, Hong Kong SAR	France	4652.88
China, Hong Kong SAR	Germany	1.35013e+08
China, Hong Kong SAR	Germany	210371
China, Hong Kong SAR	India	8315.02
China, Hong Kong SAR	India	3.94518e+08
China, Hong Kong SAR	Indonesia	117.909
China, Hong Kong SAR	Italy	2.13582e+06
China, Hong Kong SAR	Italy	343290
China, Hong Kong SAR	Japan	3.77639e+08
China, Hong Kong SAR	Japan	1.72842e+06
China, Hong Kong SAR	Malaysia	4215.3
China, Hong Kong SAR	Malaysia	9850.02
China, Hong Kong SAR	Netherlands	9.48783e+07
China, Hong Kong SAR	Oceania, nes	667.849
China, Hong Kong SAR	Other Asia, nes	1.24021e+06
China, Hong Kong SAR	Other Asia, nes	1.21351e+06
China, Hong Kong SAR	Philippines	401.844
China, Hong Kong SAR	Poland	16797.5
China, Hong Kong SAR	Russian Federation	2.52564e+07
China, Hong Kong SAR	Russian Federation	80120.3
China, Hong Kong SAR	Singapore	194574
China, Hong Kong SAR	Singapore	970745
China, Hong Kong SAR	South Africa	6.64845e+08
China, Hong Kong SAR	Spain	23918.1
China, Hong Kong SAR	Sweden	18007
China, Hong Kong SAR	Switzerland	5.81666e+08
China, Hong Kong SAR	Switzerland	3.32245e+06
China, Hong Kong SAR	Thailand	2.07611e+08
China, Hong Kong SAR	Thailand	264994
China, Hong Kong SAR	United Arab Emirates	5.22063e+08
China, Hong Kong SAR	United Kingdom	7.21681e+08
China, Hong Kong SAR	United Kingdom	187889
China, Hong Kong SAR	USA	2.92231e+07
China, Hong Kong SAR	USA	1.68753e+06
China, Macao SAR	China, Hong Kong SAR	50609
Colombia	China	1141
Colombia	Italy	3606
Colombia	Nepal	48
Colombia	Spain	28888
Colombia	Switzerland	3135
Colombia	United Kingdom	6614
Colombia	USA	19403
Colombia	USA	6999
Comoros	China	125.57
Comoros	India	193.749
Costa Rica	Belgium	17942
Costa Rica	China	1901
Costa Rica	China, Hong Kong SAR	2849
Costa Rica	France	304002
Costa Rica	Germany	2347
Costa Rica	Japan	81
Costa Rica	Japan	187
Costa Rica	Spain	24517
Costa Rica	Switzerland	776011
Costa Rica	USA	6365168
Costa Rica	USA	8340
Côte d'Ivoire	Areas, nes	636.805
Côte d'Ivoire	China	62.211
Côte d'Ivoire	Colombia	174.342
Côte d'Ivoire	Egypt	101.247
Côte d'Ivoire	Ethiopia	172.12
Côte d'Ivoire	France	17974.5
Côte d'Ivoire	France	26.741
Côte d'Ivoire	Ghana	25.312
Côte d'Ivoire	Kenya	212.619
Côte d'Ivoire	Lebanon	612.192
Côte d'Ivoire	Mali	1268.27
Côte d'Ivoire	United Arab Emirates	88.591
Croatia	Austria	14706
Croatia	Canada	4912
Croatia	France	384
Croatia	Germany	1659449
Croatia	Germany	488
Croatia	Italy	613302
Croatia	Slovenia	27609
Croatia	Slovenia	34204
Croatia	Spain	2181
Croatia	United Kingdom	1923
Cyprus	China	2319.99
Cyprus	Italy	5464.35
Cyprus	Italy	965.276
Cyprus	United Kingdom	8245.9
Cyprus	USA	6577.19
Czechia	Areas, nes	20570
Czechia	Australia	23222
Czechia	Austria	508200
Czechia	Austria	74
Czechia	Belgium	744
Czechia	China	2991
Czechia	China	99993
Czechia	China, Hong Kong SAR	2582
Czechia	Germany	3958964
Czechia	Germany	29763
Czechia	Indonesia	1646
Czechia	Italy	1313180
Czechia	Japan	5339
Czechia	Other Asia, nes	4581
Czechia	Philippines	11765
Czechia	Poland	419217
Czechia	Russian Federation	2312386
Czechia	Singapore	41
Czechia	Slovakia	28557257
Czechia	Slovakia	3130
Czechia	Slovenia	67
Czechia	South Africa	661318
Czechia	Switzerland	1344720
Czechia	Thailand	805
Czechia	United Kingdom	5651416
Czechia	USA	856569
Czechia	USA	990
Czechia	Viet Nam	3183
Dem. Rep. of the Congo	Belgium	583.608
Dem. Rep. of the Congo	China, Hong Kong SAR	205673
Dem. Rep. of the Congo	Germany	41023.8
Dem. Rep. of the Congo	South Africa	2680.55
Denmark	Australia	22530
Denmark	Austria	46802
Denmark	Austria	2535
Denmark	Belgium	14062
Denmark	Bulgaria	2576
Denmark	China	90595
Denmark	China, Hong Kong SAR	42924
Denmark	Czechia	46003
Denmark	Czechia	58
Denmark	Estonia	16039
Denmark	Finland	4157
Denmark	Finland	969
Denmark	France	17251
Denmark	France	5823
Denmark	French Polynesia	307175
Denmark	Germany	5578172
Denmark	Germany	86340
Denmark	Greece	2767
Denmark	Greece	23
Denmark	Hungary	1922
Denmark	Hungary	11
Denmark	India	5513
Denmark	Indonesia	9661
Denmark	Ireland	747953
Denmark	Italy	39
Denmark	Italy	4987
Denmark	Japan	47927
Denmark	Kiribati	15
Denmark	Latvia	53670
Denmark	Lithuania	20595
Denmark	Lithuania	4599
Denmark	Luxembourg	220
Denmark	Malta	77
Denmark	Myanmar	9300
Denmark	Netherlands	22959
Denmark	Netherlands	8779
Denmark	Norway	329
Denmark	Norway	1807
Denmark	Poland	37259
Denmark	Poland	2914
Denmark	Portugal	202
Denmark	Romania	270
Denmark	Slovakia	23378
Denmark	Spain	9408
Denmark	Spain	2208
Denmark	Sweden	88
Denmark	Switzerland	852331
Denmark	Switzerland	4599
Denmark	Türkiye	144
Denmark	United Kingdom	780610
Denmark	United Kingdom	5452
Denmark	USA	277960
Denmark	USA	5897
Dominican Rep.	Canada	177.128
Dominican Rep.	China	5970.34
Dominican Rep.	Spain	3651.07
Dominican Rep.	USA	8.34437e+06
Dominican Rep.	Viet Nam	1896.47
Ecuador	Brazil	3051
Ecuador	China	692
Ecuador	Spain	12548
Ecuador	USA	15057
Ecuador	USA	846
Egypt	Germany	4077.07
Egypt	Germany	128.831
Egypt	United Kingdom	876.483
El Salvador	China	2658.69
El Salvador	Italy	559.98
El Salvador	Japan	45.52
El Salvador	Pakistan	1291.87
El Salvador	Rep. of Korea	715.25
El Salvador	Spain	3535.11
El Salvador	USA	139.17
Estonia	China	123459
Estonia	Germany	9872238
Estonia	Germany	222
Estonia	India	157
Estonia	Japan	1807
Estonia	Other Europe, nes	522
Estonia	Poland	185555
Estonia	Thailand	188
Estonia	Türkiye	830
Estonia	Ukraine	37
Estonia	United Kingdom	848387
Estonia	USA	83
Eswatini	Denmark	345.008
Eswatini	South Africa	229.251
Eswatini	South Africa	820.739
Ethiopia	China	39588.8
Ethiopia	Denmark	881.886
Ethiopia	Türkiye	1876.12
Ethiopia	Zimbabwe	104.568
Fiji	Australia	3028.19
Fiji	China	198.796
Fiji	China, Hong Kong SAR	124801
Fiji	France	1079.79
Fiji	Germany	18516.2
Fiji	Japan	16756.6
Fiji	New Zealand	28807.4
Fiji	USA	13724.1
Finland	Australia	2581
Finland	Austria	227
Finland	Belgium	421
Finland	Bulgaria	346059
Finland	Canada	74
Finland	China	306887
Finland	China, Hong Kong SAR	3498
Finland	Denmark	4039
Finland	Estonia	2225
Finland	France	19818
Finland	France	1203
Finland	Germany	105577
Finland	Germany	2279
Finland	India	250
Finland	Italy	3194
Finland	Italy	17
Finland	Japan	3245
Finland	Sweden	607959
Finland	Sweden	10428
Finland	Switzerland	298252
Finland	Thailand	770
Finland	United Kingdom	319259
Finland	United Kingdom	3969
Finland	USA	48736
Finland	USA	3718
France	Areas, nes	500314
France	Areas, nes	4910
France	Australia	8282
France	Austria	242121
France	Belgium	24351128
France	Belgium	1322
France	Cameroon	1017
France	Canada	19310
France	China	47778
France	China	1070724
France	China, Hong Kong SAR	18298
France	China, Hong Kong SAR	632193
France	Costa Rica	221
France	Czechia	487846
France	Denmark	51196
France	France	95152
France	France	24626
France	French Polynesia	20118
France	Germany	35457865
France	Germany	50465
France	Greece	31393
France	Hungary	14665
France	India	136
France	India	785
France	Ireland	772
France	Italy	22130987
France	Italy	22259
France	Japan	1730487
France	Japan	33482
France	Netherlands	5864
France	Other Asia, nes	2966
France	Pakistan	1398
France	Philippines	27325
France	Rep. of Korea	10283
France	Singapore	1742
France	Singapore	101
France	Spain	7609465
France	Spain	2611
France	Sweden	15131747
France	Switzerland	24639770
France	Switzerland	3607931
France	Thailand	27998
France	Thailand	22120
France	Tunisia	88
France	Türkiye	27
France	United Kingdom	6986580
France	United Kingdom	97457
France	USA	32156052
France	USA	729985
France	Viet Nam	306
French Polynesia	Australia	9249
French Polynesia	France	7149
French Polynesia	French Polynesia	299
Gabon	France	10860.8
Gambia	Spain	4.188
Gambia	United Kingdom	2.235
Georgia	China	699.59
Georgia	Germany	58.05
Georgia	India	389.8
Germany	Australia	19858.4
Germany	Australia	2478.01
Germany	Austria	4.04837e+07
Germany	Austria	12999
Germany	Belgium	3.63754e+08
Germany	Belgium	441.471
Germany	Brazil	3.32975e+06
Germany	Bulgaria	53554.5
Germany	Canada	1.05653e+07
Germany	Canada	2656.59
Germany	China	8.48555e+06
Germany	China	5.43746e+06
Germany	China, Hong Kong SAR	1.79147e+06
Germany	China, Hong Kong SAR	343456
Germany	Cyprus	1.6364e+07
Germany	Czechia	4.42621e+07
Germany	Denmark	9377.38
Germany	Denmark	5068.05
Germany	Finland	4262.75
Germany	Finland	277.306
Germany	France	4.59886e+07
Germany	France	115611
Germany	French Polynesia	9082.33
Germany	Georgia	57.68
Germany	Greece	20365.4
Germany	Hungary	9030.2
Germany	Indonesia	111723
Germany	Indonesia	4136.3
Germany	Iran	555686
Germany	Ireland	972643
Germany	Ireland	679.955
Germany	Israel	85419.1
Germany	Israel	691.047
Germany	Italy	1.86487e+07
Germany	Italy	18636.1
Germany	Japan	2.42413e+07
Germany	Japan	201152
Germany	Latvia	147731
Germany	Lebanon	5968.74
Germany	Lithuania	2.10687e+06
Germany	Luxembourg	1.22159e+06
Germany	Malaysia	19931.7
Germany	Mexico	1.50259e+07
Germany	Netherlands	1.54886e+07
Germany	Netherlands	20492.9
Germany	Norway	4.15311e+07
Germany	Norway	3073.66
Germany	Other Asia, nes	29757.2
Germany	Other Asia, nes	1049.33
Germany	Philippines	15000
Germany	Philippines	1761.45
Germany	Poland	4.40342e+06
Germany	Portugal	86.52
Germany	Rep. of Korea	2.99774e+06
Germany	Romania	237565
Germany	Russian Federation	2.8302e+08
Germany	Serbia	117342
Germany	Singapore	3.61437e+06
Germany	Slovakia	355351
Germany	Slovenia	32418.2
Germany	South Africa	8.03811e+08
Germany	Spain	334368
Germany	Sweden	605109
Germany	Sweden	1808.04
Germany	Switzerland	2.22676e+08
Germany	Switzerland	41915.4
Germany	Thailand	20612.7
Germany	Thailand	45934.1
Germany	Türkiye	749517
Germany	Türkiye	543.52
Germany	Ukraine	28186.5
Germany	United Arab Emirates	3665.99
Germany	United Arab Emirates	312.801
Germany	United Kingdom	7.41036e+08
Germany	United Kingdom	866.304
Germany	United Rep. of Tanzania	3713.68
Germany	USA	2.36819e+08
Germany	USA	60775.5
Germany	Viet Nam	659.988
Ghana	China	4355.21
Ghana	China	25.595
Ghana	Italy	14.046
Ghana	South Africa	16.755
Ghana	Viet Nam	8603.24
Greece	Belgium	22989
Greece	Canada	3771
Greece	China	15448
Greece	China, Hong Kong SAR	46659
Greece	France	14792
Greece	Germany	51886
Greece	Germany	357
Greece	Italy	56769
Greece	Italy	7613
Greece	Spain	15877
Greece	Switzerland	48981
Greece	United Kingdom	1873
Greece	USA	5727
Greenland	Denmark	106.06
Grenada	USA	17.407
Guatemala	Colombia	5
Guatemala	Italy	1037
Guatemala	Other Asia, nes	1176
Guatemala	Spain	1299
Guatemala	USA	49762
Guatemala	USA	4033
Guinea	China	6235
Guinea	China	1743
Guinea	Saudi Arabia	12
Honduras	China	7356
Honduras	Colombia	1
Honduras	Rep. of Korea	1237
Honduras	USA	58
Honduras	USA	6203
Hungary	Austria	32408
Hungary	Bulgaria	45
Hungary	China	1047
Hungary	China, Hong Kong SAR	12749
Hungary	Germany	332551
Hungary	Germany	13642
Hungary	Israel	780
Hungary	Italy	15436
Hungary	Spain	5452
Hungary	Switzerland	18635
Hungary	Thailand	233
Hungary	United Kingdom	6244
Hungary	United Kingdom	1905
Hungary	USA	8868
Hungary	USA	387
Iceland	Belgium	806
Iceland	China	217
Iceland	China, Hong Kong SAR	212
Iceland	Germany	58495
Iceland	Italy	6586
Iceland	United Kingdom	609
Iceland	USA	25933
India	Austria	2526
India	Belgium	28795311
India	China	502476
India	China	2062
India	China, Hong Kong SAR	675226
India	China, Hong Kong SAR	12911
India	Czechia	393100
India	Dem. People's Rep. of Korea	919
India	Egypt	1916133
India	France	93029
India	Germany	11855518
India	Germany	7802
India	Italy	5337437
India	Japan	7650847
India	Netherlands	2608
India	Norway	31548
India	Other Asia, nes	12957
India	Rep. of Korea	5643
India	Russian Federation	1684304
India	Singapore	81852
India	South Africa	61756547
India	Spain	69094
India	Switzerland	5982747
India	United Arab Emirates	265217
India	United Kingdom	46162672
India	United Rep. of Tanzania	170
India	USA	51569642
Indonesia	China	38681
Indonesia	China, Hong Kong SAR	51414
Indonesia	France	564
Indonesia	Germany	620
Indonesia	Italy	7522
Indonesia	Japan	56542
Indonesia	Malaysia	24824
Indonesia	Malaysia	167
Indonesia	Other Asia, nes	4945
Indonesia	Rep. of Korea	346336
Indonesia	Seychelles	1710
Indonesia	Singapore	16408
Indonesia	Singapore	229
Indonesia	Switzerland	1226
Indonesia	Thailand	171066
Indonesia	USA	201
Indonesia	USA	603
Iran	India	1351489
Iran	Other Asia, nes	302961
Ireland	Areas, nes	20660.2
Ireland	Belgium	5192.52
Ireland	Belgium	969.714
Ireland	China	271.831
Ireland	China	17877.6
Ireland	China, Hong Kong SAR	10195.3
Ireland	China, Hong Kong SAR	806.616
Ireland	Germany	1.81398e+08
Ireland	Germany	19730.5
Ireland	Italy	60526.2
Ireland	Japan	12685.1
Ireland	Netherlands	3.53255e+06
Ireland	Portugal	199406
Ireland	Switzerland	219.684
Ireland	Thailand	80.994
Ireland	Ukraine	49816
Ireland	United Arab Emirates	237.436
Ireland	United Kingdom	2.88994e+06
Ireland	United Kingdom	81564.7
Ireland	USA	2.71353e+07
Ireland	USA	95854.2
Ireland	Viet Nam	17946.4
Ireland	Viet Nam	262.955
Israel	China	40000
Israel	China, Hong Kong SAR	94000
Israel	Czechia	26000
Israel	France	214000
Israel	France	1000
Israel	Germany	467000
Israel	Germany	7000
Israel	India	24000
Israel	Italy	17000
Israel	Italy	9000
Israel	Rep. of Korea	23000
Israel	Spain	4000
Israel	Switzerland	462000
Israel	Thailand	7000
Israel	United Kingdom	185000
Israel	USA	4471000
Israel	USA	5000
Italy	Austria	969728
Italy	Belgium	8.13645e+06
Italy	Belgium	3327.64
Italy	Bulgaria	37130.9
Italy	Canada	1647.18
Italy	China	13490.3
Italy	China	1.64584e+06
Italy	China, Hong Kong SAR	148067
Italy	Croatia	524816
Italy	Czechia	1.18503e+07
Italy	Egypt	1132.51
Italy	Estonia	1885.66
Italy	Finland	2590.01
Italy	France	1.0356e+07
Italy	France	337042
Italy	French Polynesia	1.48878e+06
Italy	Germany	5.21862e+07
Italy	Germany	148183
Italy	Hungary	3.85367e+06
Italy	India	186167
Italy	Israel	293161
Italy	Japan	73954.6
Italy	Japan	112503
Italy	Lithuania	11665.6
Italy	Luxembourg	566.808
Italy	Netherlands	1.22075e+07
Italy	Netherlands	65.444
Italy	Norway	3.89717e+06
Italy	Peru	188373
Italy	Philippines	6243.77
Italy	Poland	2.21199e+06
Italy	Poland	745.392
Italy	Portugal	1.88105e+06
Italy	Portugal	25096
Italy	Romania	283583
Italy	Romania	724.317
Italy	Russian Federation	2.43268e+08
Italy	Slovakia	94664.8
Italy	South Africa	1.71812e+08
Italy	Spain	2.96592e+06
Italy	Spain	61147.6
Italy	Sweden	32061.8
Italy	Switzerland	1.36269e+08
Italy	Thailand	36360
Italy	Thailand	7854.34
Italy	United Kingdom	4.06226e+07
Italy	United Kingdom	15131.9
Italy	USA	8.58947e+07
Italy	USA	58240.4
Italy	Viet Nam	226541
Jamaica	China	2240
Jamaica	China, Hong Kong SAR	2426
Jamaica	Japan	77
Jamaica	Switzerland	76
Jamaica	Thailand	50
Jamaica	USA	35817
Japan	Armenia	286091
Japan	Australia	7852172
Japan	Belgium	295950
Japan	Canada	2397
Japan	Canada	2355
Japan	China	38085041
Japan	China	3118131
Japan	China, Hong Kong SAR	5286820
Japan	China, Hong Kong SAR	83218
Japan	Denmark	12520
Japan	France	428910
Japan	French Polynesia	10429
Japan	Germany	87182423
Japan	Germany	24966
Japan	India	14173
Japan	Indonesia	225037
Japan	Italy	7084752
Japan	Italy	86359
Japan	Lebanon	7495
Japan	Malaysia	117225
Japan	Norway	44730966
Japan	Other Africa, nes	37486
Japan	Other Asia, nes	23679682
Japan	Other Asia, nes	134282
Japan	Philippines	4823143
Japan	Philippines	4091
Japan	Rep. of Korea	37638702
Japan	Rep. of Korea	67996
Japan	Russian Federation	439411259
Japan	Singapore	606735
Japan	South Africa	2211149144
Japan	Spain	1802
Japan	Switzerland	50524518
Japan	Thailand	35155
Japan	Thailand	89185
Japan	United Kingdom	92947902
Japan	United Kingdom	18007
Japan	USA	128772144
Japan	USA	142306
Japan	Viet Nam	361021
Japan	Viet Nam	185907
Jordan	Italy	62577
Jordan	USA	27762
Kazakhstan	Australia	1200
Kazakhstan	Austria	663
Kazakhstan	China	34187
Kazakhstan	Germany	5134
Kazakhstan	Japan	903
Kazakhstan	Other Asia, nes	106
Kazakhstan	Russian Federation	32463
Kazakhstan	Russian Federation	1028
Kazakhstan	Spain	143
Kazakhstan	Switzerland	91019
Kazakhstan	United Kingdom	7092
Kazakhstan	USA	4736
Kenya	Belgium	2700.87
Kenya	India	608.09
Kenya	South Africa	1650.9
Kenya	South Africa	3786.75
Kuwait	China	14941.1
Kuwait	India	505.126
Kuwait	Switzerland	1259.49
Kuwait	Syria	744.397
Kuwait	USA	15791.8
Kyrgyzstan	China	5829
Kyrgyzstan	Germany	13015
Kyrgyzstan	Kazakhstan	96
Lao People's Dem. Rep.	Thailand	260
Latvia	Belgium	115200
Latvia	China	44810
Latvia	China, Hong Kong SAR	32710.6
Latvia	Estonia	4697.82
Latvia	Germany	4188.77
Latvia	Germany	221.804
Latvia	India	963.74
Latvia	Italy	1476.11
Latvia	Poland	398618
Latvia	Russian Federation	477201
Latvia	Russian Federation	27.726
Latvia	Spain	65420.1
Latvia	Thailand	2869.04
Latvia	United Kingdom	55061.8
Latvia	USA	88.722
Lebanon	Austria	5009.06
Lebanon	China	3672.27
Lebanon	South Africa	26686.6
Lebanon	Switzerland	175421
Lebanon	USA	1456.17
Lebanon	USA	878.214
Lesotho	South Africa	251.143
Lesotho	South Africa	1367.82
Lithuania	Austria	516
Lithuania	Belarus	55
Lithuania	China	1535
Lithuania	China	255
Lithuania	France	64
Lithuania	Germany	12772
Lithuania	Germany	48440
Lithuania	India	22
Lithuania	Italy	2430646
Lithuania	Latvia	102
Lithuania	Poland	13953
Lithuania	Spain	43
Lithuania	Thailand	1829
Lithuania	United Kingdom	1501
Luxembourg	Belgium	1387
Luxembourg	Belgium	12691
Luxembourg	China	39847
Luxembourg	China, Hong Kong SAR	1022
Luxembourg	France	33259
Luxembourg	France	28149
Luxembourg	Germany	517767
Luxembourg	Germany	2612
Luxembourg	Italy	29
Luxembourg	Netherlands	3927
Luxembourg	Other Europe, nes	181617
Luxembourg	Other Europe, nes	13622
Luxembourg	Switzerland	1094715
Luxembourg	United Kingdom	2101
Madagascar	China	506.037
Madagascar	USA	1637.12
Malawi	China	2231.45
Malaysia	Australia	28735
Malaysia	Austria	11000
Malaysia	China	133185536
Malaysia	China	7377
Malaysia	China, Hong Kong SAR	671864
Malaysia	China, Hong Kong SAR	67487
Malaysia	Germany	731862
Malaysia	Germany	6246
Malaysia	Japan	7379968
Malaysia	Japan	79847
Malaysia	Netherlands	6554
Malaysia	Other Asia, nes	1042606
Malaysia	Singapore	7281536
Malaysia	Singapore	68289
Malaysia	Sweden	16407
Malaysia	Switzerland	3272066
Malaysia	Thailand	1967
Malaysia	Thailand	23303
Malaysia	United Arab Emirates	4021
Malaysia	United Kingdom	32981
Malaysia	USA	627169
Malaysia	USA	3227
Maldives	Singapore	52
Maldives	United Arab Emirates	251
Maldives	USA	120
Malta	Austria	55100
Malta	China	2931
Malta	China, Hong Kong SAR	11042
Malta	Germany	730
Malta	Germany	4111
Malta	India	2083
Malta	Italy	584
Malta	Thailand	4912
Malta	USA	296
Malta	USA	5166
Mauritius	China	944
Mauritius	France	13015
Mauritius	Germany	3171
Mauritius	Italy	108821
Mauritius	South Africa	22252
Mauritius	South Africa	79
Mauritius	Thailand	946
Mauritius	United Arab Emirates	678609
Mexico	China	326624
Mexico	Germany	1122872
Mexico	Japan	44615
Mexico	Spain	302925
Mexico	United Kingdom	1398613
Mexico	USA	10046733
Mexico	USA	776910
Mongolia	Austria	260
Mongolia	China	34
Mongolia	Germany	1341
Mongolia	Italy	531
Mongolia	Spain	5625
Mongolia	Thailand	652
Mongolia	USA	108
Mongolia	Viet Nam	159
Montenegro	China	281
Morocco	Azerbaijan	1306.06
Morocco	Belgium	6705.98
Morocco	China	1738.47
Morocco	France	36829.9
Morocco	France	2060.15
Morocco	Russian Federation	10.552
Mozambique	South Africa	1537.59
Myanmar	China	675.22
Myanmar	India	563.33
Myanmar	Thailand	2400
Namibia	Brazil	1190
Namibia	South Africa	6618
Namibia	South Africa	21368
Nepal	China	2760
Nepal	India	612
Nepal	Russian Federation	39
Netherlands	Austria	723106
Netherlands	Austria	5304.3
Netherlands	Belgium	1.14631e+06
Netherlands	Belgium	58664.4
Netherlands	Brazil	3.326
Netherlands	Bulgaria	21101.9
Netherlands	Bulgaria	279.407
Netherlands	Canada	51577.2
Netherlands	China	59733.2
Netherlands	China, Hong Kong SAR	773.913
Netherlands	China, Hong Kong SAR	128464
Netherlands	Croatia	4534.82
Netherlands	Croatia	43.242
Netherlands	Cyprus	1973.59
Netherlands	Cyprus	6.653
Netherlands	Czechia	74718.1
Netherlands	Czechia	9607.39
Netherlands	Denmark	409042
Netherlands	Denmark	57282.9
Netherlands	Estonia	7181.43
Netherlands	Estonia	474.549
Netherlands	Finland	40869.9
Netherlands	Finland	626.448
Netherlands	France	800022
Netherlands	France	24086.7
Netherlands	Germany	1.87747e+07
Netherlands	Germany	112413
Netherlands	Greece	34762.9
Netherlands	Greece	613.143
Netherlands	Hungary	25284.1
Netherlands	Hungary	987.904
Netherlands	India	3.326
Netherlands	Ireland	39377.6
Netherlands	Ireland	740.651
Netherlands	Italy	513682
Netherlands	Italy	23962.5
Netherlands	Japan	5.544
Netherlands	Latvia	8499.74
Netherlands	Latvia	97.571
Netherlands	Lithuania	20044.1
Netherlands	Lithuania	355.911
Netherlands	Luxembourg	51376.5
Netherlands	Luxembourg	245.036
Netherlands	Malaysia	535.53
Netherlands	Malta	17093.7
Netherlands	Malta	5.544
Netherlands	Norway	2.218
Netherlands	Other Asia, nes	4.435
Netherlands	Other Europe, nes	9803.64
Netherlands	Other Europe, nes	64.308
Netherlands	Philippines	181.836
Netherlands	Poland	384563
Netherlands	Poland	5340.89
Netherlands	Portugal	47672.2
Netherlands	Portugal	3631.18
Netherlands	Rep. of Korea	1.109
Netherlands	Romania	27269.9
Netherlands	Romania	1003.43
Netherlands	Russian Federation	1.109
Netherlands	Slovakia	29324.4
Netherlands	Slovakia	490.071
Netherlands	Slovenia	19525.2
Netherlands	Slovenia	1134.26
Netherlands	Spain	206004
Netherlands	Spain	5522.73
Netherlands	Sweden	101216
Netherlands	Sweden	1519
Netherlands	Switzerland	960844
Netherlands	Thailand	1.109
Netherlands	Thailand	242.818
Netherlands	United Arab Emirates	291128
Netherlands	United Kingdom	4.56561e+06
Netherlands	United Kingdom	32638.5
Netherlands	USA	535826
Netherlands	USA	4890.73
New Caledonia	China	3515
New Caledonia	China, Hong Kong SAR	6640
New Caledonia	France	4626
New Caledonia	French Polynesia	58683
New Caledonia	Netherlands	44
New Caledonia	Thailand	1087
New Caledonia	USA	64
New Zealand	Australia	44763.1
New Zealand	Australia	127430
New Zealand	Canada	54805.6
New Zealand	China	206631
New Zealand	China, Hong Kong SAR	32469.3
New Zealand	France	38.984
New Zealand	French Polynesia	29334.6
New Zealand	Germany	477036
New Zealand	India	23642.3
New Zealand	Indonesia	268.013
New Zealand	Italy	15890.8
New Zealand	Italy	1671.43
New Zealand	Japan	2.52572e+06
New Zealand	Japan	89695.3
New Zealand	New Zealand	7128.46
New Zealand	Philippines	843.72
New Zealand	Spain	910.549
New Zealand	Switzerland	106622
New Zealand	Thailand	970.417
New Zealand	Thailand	33426.5
New Zealand	Türkiye	28.542
New Zealand	United Kingdom	13684
New Zealand	United Kingdom	7805.1
New Zealand	USA	522159
New Zealand	USA	7241.23
New Zealand	Viet Nam	438.567
Niger	Nigeria	1049
Nigeria	China	8123.43
North Macedonia	Italy	8.93873e+06
North Macedonia	Japan	4610.31
North Macedonia	South Africa	1.83309e+08
North Macedonia	United Kingdom	5.46646e+08
Norway	Australia	73127
Norway	Australia	9001.4
Norway	Austria	8033.57
Norway	Belgium	3195.06
Norway	Canada	470.197
Norway	China	125574
Norway	Czechia	62038.4
Norway	Denmark	19459.3
Norway	Denmark	35081.3
Norway	France	165.339
Norway	French Polynesia	30446.2
Norway	Germany	1.38484e+07
Norway	Germany	71834.1
Norway	India	1448.95
Norway	India	283.136
Norway	Indonesia	2564.49
Norway	Italy	101153
Norway	Japan	7475.37
Norway	Malaysia	3661.78
Norway	Netherlands	238.947
Norway	Singapore	2208.74
Norway	South Africa	1.87356e+06
Norway	Spain	4135.95
Norway	Sweden	40897.4
Norway	Sweden	14413.3
Norway	Switzerland	44456.3
Norway	Türkiye	8247.08
Norway	United Arab Emirates	9143.03
Norway	United Kingdom	2.86045e+06
Norway	United Kingdom	20726.5
Norway	USA	755930
Norway	USA	25164.4
Norway	Viet Nam	326.829
Oman	China	47365.4
Oman	Germany	135584
Oman	India	12561.8
Oman	Italy	4564.37
Oman	Japan	13368
Oman	Thailand	13758.1
Oman	Ukraine	614733
Oman	United Arab Emirates	679095
Oman	USA	15079.3
Oman	Yemen	210.663
Other Asia, nes	Areas, nes	291912
Other Asia, nes	Areas, nes	669
Other Asia, nes	Australia	170187
Other Asia, nes	Belgium	322
Other Asia, nes	Canada	4917
Other Asia, nes	China	1650471
Other Asia, nes	China	3577752
Other Asia, nes	China, Hong Kong SAR	3762386
Other Asia, nes	China, Hong Kong SAR	58706
Other Asia, nes	Denmark	724
Other Asia, nes	France	29413
Other Asia, nes	France	38992
Other Asia, nes	French Polynesia	7881
Other Asia, nes	Germany	30083325
Other Asia, nes	Germany	91
Other Asia, nes	India	1756
Other Asia, nes	Indonesia	14095
Other Asia, nes	Italy	251202
Other Asia, nes	Italy	109608
Other Asia, nes	Japan	102321514
Other Asia, nes	Japan	194988
Other Asia, nes	Malaysia	45074
Other Asia, nes	Rep. of Korea	1183842
Other Asia, nes	Russian Federation	755681
Other Asia, nes	Singapore	6374579
Other Asia, nes	South Africa	24842464
Other Asia, nes	Switzerland	1085226
Other Asia, nes	Switzerland	61
Other Asia, nes	Thailand	316
Other Asia, nes	United Kingdom	10574799
Other Asia, nes	USA	34826033
Other Asia, nes	USA	33262
Pakistan	China	3292
Pakistan	Switzerland	3147
Pakistan	United Arab Emirates	68
Pakistan	USA	446
Pakistan	USA	808
Palau	China	237
Palau	China	845
Palau	Philippines	1
Palau	USA	201
Panama	Spain	9057
Panama	USA	15466
Paraguay	Spain	913
Peru	Belgium	5.01
Peru	Canada	6574.82
Peru	China	4210.86
Peru	Italy	1852.73
Peru	Madagascar	5.01
Peru	Spain	726.42
Peru	USA	18237.8
Peru	USA	927.85
Philippines	Australia	1927
Philippines	Canada	19339
Philippines	China	579
Philippines	China	1885
Philippines	China, Hong Kong SAR	2478
Philippines	France	1324
Philippines	Germany	3731
Philippines	Japan	215
Philippines	Singapore	2039
Philippines	USA	14282
Poland	Areas, nes	6490
Poland	Austria	1054
Poland	Belgium	2176
Poland	Belgium	128
Poland	China	495327
Poland	China, Hong Kong SAR	145055
Poland	Czechia	3077713
Poland	Estonia	542558
Poland	France	22712
Poland	Germany	1231121
Poland	Germany	125
Poland	Ireland	708195
Poland	Italy	4720
Poland	Japan	231
Poland	Mexico	221
Poland	Netherlands	5216888
Poland	Romania	44420472
Poland	Russian Federation	5253
Poland	Spain	14787
Poland	Switzerland	23429
Poland	Thailand	1963
Poland	United Kingdom	7064692
Poland	USA	121849
Poland	USA	89
Portugal	Austria	29306.6
Portugal	China	14473.1
Portugal	China, Hong Kong SAR	6142.74
Portugal	Czechia	6452.1
Portugal	France	1.32108e+06
Portugal	France	788.355
Portugal	Germany	1.03484e+06
Portugal	Germany	2375.05
Portugal	Italy	1.43696e+06
Portugal	Italy	797.226
Portugal	Spain	6.40625e+06
Portugal	Spain	23101.8
Portugal	Switzerland	38632.7
Portugal	Thailand	742.895
Portugal	United Kingdom	383348
Portugal	USA	23819.2
Portugal	USA	1158.69
Qatar	Bangladesh	13926.7
Qatar	Cambodia	15813.9
Qatar	China	2.49274e+06
Qatar	China, Hong Kong SAR	36731.8
Qatar	Egypt	15491.7
Qatar	France	313804
Qatar	Germany	511206
Qatar	Germany	44854.2
Qatar	India	270865
Qatar	Indonesia	31595.2
Qatar	Italy	293397
Qatar	Japan	26976.8
Qatar	Lebanon	18654.5
Qatar	Lithuania	31891.9
Qatar	Morocco	39724.1
Qatar	Pakistan	28851.2
Qatar	Peru	25708.9
Qatar	Philippines	123447
Qatar	Portugal	109992
Qatar	Rep. of Korea	119681
Qatar	Spain	304509
Qatar	Switzerland	391131
Qatar	Switzerland	142478
Qatar	Thailand	77616.3
Qatar	Türkiye	57370.5
Qatar	United Arab Emirates	271613
Qatar	United Kingdom	26587.5
Qatar	United Kingdom	326737
Qatar	USA	467050
Qatar	Viet Nam	17771.9
Rep. of Korea	Areas, nes	33421
Rep. of Korea	Australia	960
Rep. of Korea	Australia	11247
Rep. of Korea	Belgium	13063506
Rep. of Korea	China	105092
Rep. of Korea	China	2079186
Rep. of Korea	China, Hong Kong SAR	38107
Rep. of Korea	France	164
Rep. of Korea	Germany	17181766
Rep. of Korea	Indonesia	24901
Rep. of Korea	Italy	1911
Rep. of Korea	Japan	48417031
Rep. of Korea	Japan	175422
Rep. of Korea	Netherlands	100048870
Rep. of Korea	Other Asia, nes	1525
Rep. of Korea	Russian Federation	49118726
Rep. of Korea	Singapore	9992
Rep. of Korea	South Africa	184251470
Rep. of Korea	Spain	45
Rep. of Korea	Spain	8301
Rep. of Korea	Switzerland	45642586
Rep. of Korea	United Kingdom	69291673
Rep. of Korea	USA	88714396
Rep. of Korea	USA	2860
Rep. of Moldova	Russian Federation	8282
Rep. of Moldova	Spain	689
Rep. of Moldova	Switzerland	1317
Russian Federation	Austria	6450
Russian Federation	Belarus	733980
Russian Federation	China	473043
Russian Federation	China	309754
Russian Federation	China, Hong Kong SAR	7744
Russian Federation	France	4532
Russian Federation	Germany	1113422
Russian Federation	Germany	29801
Russian Federation	Italy	85266
Russian Federation	Italy	55687
Russian Federation	Japan	16168
Russian Federation	Japan	186
Russian Federation	Netherlands	16509
Russian Federation	Netherlands	277
Russian Federation	Other Asia, nes	541
Russian Federation	Other Europe, nes	886
Russian Federation	Rep. of Korea	82
Russian Federation	Russian Federation	1852703
Russian Federation	Spain	790
Russian Federation	Thailand	6871
Russian Federation	Ukraine	264430
Russian Federation	United Kingdom	65750
Russian Federation	USA	635259
Russian Federation	USA	449545
Rwanda	China	52.779
Rwanda	Italy	11.136
Saint Kitts and Nevis	China	597.44
Saint Kitts and Nevis	USA	437.87
Saint Lucia	Areas, nes	34
Saint Lucia	USA	60
Saint Lucia	USA	322
Saint Vincent and the Grenadines	Canada	267.385
Saint Vincent and the Grenadines	USA	81.089
Samoa	New Zealand	1389
Sao Tome and Principe	Portugal	75
Saudi Arabia	Areas, nes	27965.3
Saudi Arabia	Germany	55196.6
Saudi Arabia	Switzerland	3.7591e+07
Saudi Arabia	United Arab Emirates	2.53261e+06
Senegal	China	3595
Senegal	United Arab Emirates	1306
Serbia	Austria	1642
Serbia	China	16689
Serbia	Germany	283775
Serbia	Italy	14837
Serbia	Slovenia	3896
Serbia	Slovenia	1003
Serbia	Spain	1654
Serbia	Switzerland	535
Serbia	United Kingdom	9317
Seychelles	Mauritius	29.789
Seychelles	Thailand	11.761
Seychelles	United Arab Emirates	397.757
Singapore	Australia	456046
Singapore	Cambodia	18.921
Singapore	Canada	395.884
Singapore	China	676513
Singapore	China	58674.5
Singapore	China, Hong Kong SAR	664205
Singapore	China, Hong Kong SAR	299455
Singapore	Czechia	9883.99
Singapore	France	11017.1
Singapore	France	432416
Singapore	French Polynesia	78673.9
Singapore	Germany	5.9254e+07
Singapore	India	22689.8
Singapore	Indonesia	1696.33
Singapore	Indonesia	38101.6
Singapore	Italy	41975.3
Singapore	Italy	12361.2
Singapore	Japan	2.83468e+07
Singapore	Japan	550722
Singapore	Luxembourg	887.1
Singapore	Malaysia	195993
Singapore	Malaysia	30232
Singapore	Namibia	588189
Singapore	Netherlands	1683.23
Singapore	Other Asia, nes	1.58013e+07
Singapore	Philippines	147.001
Singapore	Rep. of Korea	879.095
Singapore	Rep. of Korea	477872
Singapore	South Africa	2.3104e+06
Singapore	Switzerland	2.62786e+06
Singapore	Thailand	5856.75
Singapore	Türkiye	1569.71
Singapore	United Kingdom	316755
Singapore	United Kingdom	182419
Singapore	USA	6.44228e+07
Singapore	USA	34829
Singapore	Viet Nam	523.964
Slovakia	Austria	421271
Slovakia	China	13055.6
Slovakia	China, Hong Kong SAR	813.273
Slovakia	Czechia	824917
Slovakia	Czechia	195016
Slovakia	Germany	4.32988e+07
Slovakia	Germany	12660.7
Slovakia	Hungary	51622.3
Slovakia	Italy	140329
Slovakia	Other Asia, nes	3336.31
Slovakia	Other Europe, nes	2.10849e+07
Slovakia	Other Europe, nes	242.983
Slovakia	Poland	14452.5
Slovakia	Poland	7928.58
Slovakia	Spain	924889
Slovakia	Switzerland	1363.59
Slovakia	Thailand	956.4
Slovakia	United Kingdom	2602.92
Slovakia	USA	769968
Slovenia	Australia	2169
Slovenia	Austria	692858
Slovenia	Austria	1570
Slovenia	Belgium	10575
Slovenia	Canada	7869
Slovenia	China	21362
Slovenia	Croatia	18199
Slovenia	Czechia	17211
Slovenia	Germany	315862
Slovenia	Germany	3481
Slovenia	Italy	7020
Slovenia	Italy	5125
Slovenia	Slovakia	1642
Slovenia	Switzerland	276925
Slovenia	Thailand	31
Slovenia	USA	14024
South Africa	Areas, nes	13776.8
South Africa	Australia	149.934
South Africa	Austria	325.811
South Africa	Cameroon	979
South Africa	Canada	52389.6
South Africa	China	2483.83
South Africa	China	243216
South Africa	China, Hong Kong SAR	3230.05
South Africa	Czechia	10.502
South Africa	Dem. Rep. of the Congo	623.171
South Africa	Denmark	428.954
South Africa	France	62.466
South Africa	Germany	92309.1
South Africa	India	6296.3
South Africa	Israel	1646.22
South Africa	Italy	487710
South Africa	Malaysia	3672.02
South Africa	Mauritius	8220.2
South Africa	Mexico	41.148
South Africa	Namibia	290.15
South Africa	Other Asia, nes	1940.6
South Africa	Other Asia, nes	197.822
South Africa	South Africa	1605.23
South Africa	Switzerland	640249
South Africa	Thailand	87554.4
South Africa	United Kingdom	248951
South Africa	United Kingdom	149.072
South Africa	USA	47563.8
South Africa	USA	1642.3
South Africa	Viet Nam	543.933
South Africa	Zambia	30.645
South Africa	Zimbabwe	30.645
Spain	Australia	34372.9
Spain	Australia	12633.7
Spain	Austria	2762.97
Spain	Belgium	615.81
Spain	Belgium	176.245
Spain	China	406104
Spain	China, Hong Kong SAR	75846.2
Spain	Czechia	19127.2
Spain	France	3.16947e+06
Spain	France	85851.4
Spain	Germany	659779
Spain	Germany	2246.57
Spain	Gibraltar	188.787
Spain	Greece	331.775
Spain	Indonesia	4401.7
Spain	Ireland	2551.69
Spain	Ireland	261.135
Spain	Italy	9.37473e+06
Spain	Italy	72026.9
Spain	Japan	70008.6
Spain	Malaysia	336.011
Spain	Mexico	10866.6
Spain	Netherlands	1136.9
Spain	Norway	2431.28
Spain	Other Asia, nes	6242.92
Spain	Other Europe, nes	30174.3
Spain	Poland	12078.9
Spain	Portugal	6.59628e+06
Spain	Portugal	9460.08
Spain	Romania	33.268
Spain	Slovakia	1.56362e+06
Spain	Switzerland	639281
Spain	Switzerland	28171.2
Spain	Thailand	4308.51
Spain	United Kingdom	2.21671e+07
Spain	United Kingdom	6464.63
Spain	USA	565677
Spain	USA	3643.76
Sri Lanka	China	6092
Sri Lanka	China, Hong Kong SAR	388192
Sri Lanka	France	16235
Sri Lanka	Germany	1279
Sri Lanka	India	8
Sri Lanka	Italy	2836
Sri Lanka	Switzerland	1034
Sri Lanka	USA	7654
State of Palestine	China	4314
Sweden	Australia	118.571
Sweden	Austria	949043
Sweden	China	213191
Sweden	China, Hong Kong SAR	711.427
Sweden	China, Hong Kong SAR	65569.8
Sweden	Czechia	9367.12
Sweden	Denmark	11975.7
Sweden	Denmark	2845.71
Sweden	Finland	948.569
Sweden	France	31777.1
Sweden	Germany	1.21369e+06
Sweden	Germany	21461.4
Sweden	Gibraltar	948.569
Sweden	Italy	948.569
Sweden	Italy	4505.7
Sweden	Japan	23121.4
Sweden	Malaysia	37942.8
Sweden	Norway	2.16997e+06
Sweden	Singapore	118.571
Sweden	Switzerland	528234
Sweden	United Kingdom	3.26403e+06
Sweden	United Kingdom	1185.71
Sweden	USA	87742.6
Sweden	USA	41262.7
Switzerland	Australia	63472.9
Switzerland	Australia	5931.86
Switzerland	Austria	270763
Switzerland	Austria	8028.21
Switzerland	Azerbaijan	277994
Switzerland	Belarus	33014.1
Switzerland	Belgium	8.13704e+06
Switzerland	Belgium	871580
Switzerland	Canada	475004
Switzerland	China	348.872
Switzerland	China	274637
Switzerland	China, Hong Kong SAR	1.96434e+06
Switzerland	China, Hong Kong SAR	9.15495e+06
Switzerland	Czechia	753265
Switzerland	Czechia	24.919
Switzerland	Denmark	7054.27
Switzerland	France	2.10358e+07
Switzerland	France	7.194e+06
Switzerland	French Polynesia	9688.46
Switzerland	Germany	1.14729e+08
Switzerland	Germany	876543
Switzerland	India	546491
Switzerland	Ireland	639.599
Switzerland	Israel	14407.6
Switzerland	Italy	1.59927e+08
Switzerland	Italy	1.97057e+06
Switzerland	Japan	4.10605e+07
Switzerland	Japan	69490.9
Switzerland	Kazakhstan	2.45818e+06
Switzerland	Kuwait	105258
Switzerland	Lebanon	2.46895e+06
Switzerland	Lithuania	14.536
Switzerland	Luxembourg	644.79
Switzerland	Luxembourg	519.155
Switzerland	Malaysia	12408.8
Switzerland	Nepal	414.285
Switzerland	Netherlands	2382.92
Switzerland	Netherlands	4137.66
Switzerland	Other Asia, nes	2.56994e+06
Switzerland	Peru	177.551
Switzerland	Philippines	187.934
Switzerland	Russian Federation	1.04539e+08
Switzerland	Saudi Arabia	2.71788e+06
Switzerland	Saudi Arabia	212334
Switzerland	Serbia	474195
Switzerland	Singapore	306467
Switzerland	South Africa	1.34364e+08
Switzerland	Spain	165051
Switzerland	Spain	17793.5
Switzerland	Thailand	11747.4
Switzerland	Türkiye	1.15493e+06
Switzerland	Türkiye	1595.88
Switzerland	Ukraine	7.49218e+06
Switzerland	United Arab Emirates	2.20967e+06
Switzerland	United Kingdom	1.04527e+08
Switzerland	United Kingdom	2.43072e+06
Switzerland	USA	2.28224e+08
Switzerland	USA	1.05725e+07
Thailand	Australia	518779
Thailand	Austria	314086
Thailand	China	67099.8
Thailand	China	334364
Thailand	China, Hong Kong SAR	2.09372e+06
Thailand	China, Hong Kong SAR	129632
Thailand	Czechia	41050.2
Thailand	Denmark	13361.4
Thailand	France	93478.4
Thailand	Germany	6.49692e+06
Thailand	India	6634.76
Thailand	Italy	729767
Thailand	Japan	2.51009e+07
Thailand	Japan	250437
Thailand	Malaysia	340.04
Thailand	Myanmar	3932.7
Thailand	New Zealand	543806
Thailand	Other Asia, nes	42952.4
Thailand	Philippines	179.59
Thailand	Russian Federation	2063.29
Thailand	Russian Federation	586.24
Thailand	Singapore	14517.2
Thailand	South Africa	625996
Thailand	Spain	73941
Thailand	Switzerland	138860
Thailand	Thailand	4307.28
Thailand	Thailand	144834
Thailand	United Arab Emirates	518510
Thailand	United Kingdom	286701
Thailand	USA	6.52606e+06
Thailand	USA	11716.2
Togo	Ghana	1352.61
Trinidad and Tobago	Canada	704.838
Trinidad and Tobago	China	993.516
Trinidad and Tobago	USA	774.46
Trinidad and Tobago	USA	1038.99
Tunisia	France	8020
Tunisia	France	2151
Türkiye	Austria	885041
Türkiye	Austria	196
Türkiye	China	72379
Türkiye	France	16178
Türkiye	France	65683
Türkiye	Germany	327805
Türkiye	India	7501
Türkiye	Italy	241942
Türkiye	Italy	6038
Türkiye	Switzerland	25208
Türkiye	United Arab Emirates	146898
Türkiye	United Kingdom	406062
Türkiye	USA	547239
Türkiye	USA	2053
Uganda	Belgium	7488
Uganda	China	1600
Uganda	United Arab Emirates	800
Ukraine	Austria	85
Ukraine	Belgium	10138
Ukraine	China	996
Ukraine	Czechia	149490
Ukraine	France	44377
Ukraine	Germany	582407
Ukraine	Japan	5054
Ukraine	Russian Federation	311092
Ukraine	Spain	221
Ukraine	Switzerland	1132260
Ukraine	Thailand	52
Ukraine	United Kingdom	635828
Ukraine	USA	2013
United Arab Emirates	Albania	31.042
United Arab Emirates	Australia	37031
United Arab Emirates	Bangladesh	1361.47
United Arab Emirates	Belgium	245.065
United Arab Emirates	Canada	29298.7
United Arab Emirates	Canada	2.723
United Arab Emirates	China	33612.2
United Arab Emirates	China, Hong Kong SAR	230799
United Arab Emirates	China, Hong Kong SAR	26555.8
United Arab Emirates	Colombia	39872.6
United Arab Emirates	Denmark	3427.91
United Arab Emirates	France	17515.5
United Arab Emirates	Germany	2682.76
United Arab Emirates	Germany	408.441
United Arab Emirates	Greece	16238.9
United Arab Emirates	India	118093
United Arab Emirates	India	902546
United Arab Emirates	Italy	500739
United Arab Emirates	Italy	15550.7
United Arab Emirates	Japan	7.12694e+06
United Arab Emirates	Lebanon	1918.58
United Arab Emirates	Netherlands	59001.3
United Arab Emirates	Other Asia, nes	768.318
United Arab Emirates	Poland	83.867
United Arab Emirates	Qatar	776.038
United Arab Emirates	Rep. of Korea	636.351
United Arab Emirates	Saudi Arabia	2964.19
United Arab Emirates	Singapore	1195.91
United Arab Emirates	South Africa	2.27698e+07
United Arab Emirates	Spain	394.009
United Arab Emirates	Switzerland	1.58939e+07
United Arab Emirates	Switzerland	51526.7
United Arab Emirates	Syria	25.868
United Arab Emirates	Syria	40.572
United Arab Emirates	Thailand	2995.23
United Arab Emirates	United Kingdom	4.12513e+06
United Arab Emirates	United Kingdom	7059.49
United Arab Emirates	USA	741164
United Arab Emirates	USA	16199.3
United Arab Emirates	Zimbabwe	568195
United Kingdom	Australia	2082
United Kingdom	Australia	1738
United Kingdom	Austria	414140
United Kingdom	Austria	1887
United Kingdom	Belgium	101536980
United Kingdom	Brazil	27984
United Kingdom	Canada	27772964
United Kingdom	Canada	1900
United Kingdom	China	38177
United Kingdom	China	2142675
United Kingdom	China, Hong Kong SAR	1367052
United Kingdom	China, Hong Kong SAR	284514
United Kingdom	Czechia	1642
United Kingdom	Denmark	11645
United Kingdom	France	25085
United Kingdom	France	5928118
United Kingdom	Germany	84567519
United Kingdom	Germany	197286
United Kingdom	Greece	711
United Kingdom	Hungary	333
United Kingdom	India	55251
United Kingdom	India	44753
United Kingdom	Indonesia	379590
United Kingdom	Ireland	12551780
United Kingdom	Ireland	2766
United Kingdom	Israel	6952
United Kingdom	Italy	69522974
United Kingdom	Italy	260312
United Kingdom	Japan	43122113
United Kingdom	Japan	518031
United Kingdom	Latvia	199
United Kingdom	Luxembourg	595192
United Kingdom	Malta	283
United Kingdom	Netherlands	26923
United Kingdom	Netherlands	3487
United Kingdom	Norway	74920444
United Kingdom	Other Asia, nes	17345
United Kingdom	Philippines	7231
United Kingdom	Poland	1047
United Kingdom	Rep. of Korea	1852079
United Kingdom	Rep. of Korea	11940
United Kingdom	Russian Federation	74427506
United Kingdom	Singapore	231744
United Kingdom	South Africa	1216594073
United Kingdom	Spain	12205735
United Kingdom	Spain	14694
United Kingdom	Sri Lanka	7054
United Kingdom	Sweden	970813
United Kingdom	Switzerland	365972210
United Kingdom	Thailand	23705
United Kingdom	Türkiye	7611
United Kingdom	United Arab Emirates	120105
United Kingdom	United Kingdom	550817
United Kingdom	USA	97528451
United Kingdom	USA	248985
United Rep. of Tanzania	China	34
United Rep. of Tanzania	China	754
United Rep. of Tanzania	Germany	23
United Rep. of Tanzania	Rwanda	28
United Rep. of Tanzania	South Africa	916
United Rep. of Tanzania	South Africa	5
United Rep. of Tanzania	Thailand	348
Uruguay	China	14340
Uruguay	China, Hong Kong SAR	2015
Uruguay	Philippines	3857
Uruguay	Spain	285
Uruguay	USA	232498
USA	Argentina	61001
USA	Australia	10047
USA	Australia	1133793
USA	Austria	5067839
USA	Bahamas	2217
USA	Belgium	35341200
USA	Brazil	1968385
USA	Canada	110376886
USA	Canada	949740
USA	China	29114339
USA	China	25904797
USA	China, Hong Kong SAR	621705
USA	Colombia	26690064
USA	Costa Rica	103181
USA	Czechia	5599241
USA	Denmark	16661
USA	Denmark	21577
USA	Dominican Rep.	30037
USA	Ecuador	69787
USA	Ethiopia	5303
USA	France	27730857
USA	France	1812925
USA	French Polynesia	248346
USA	Germany	177638858
USA	Germany	96797
USA	Honduras	18078
USA	India	2990
USA	India	79512
USA	Indonesia	10650
USA	Indonesia	119746
USA	Ireland	5056
USA	Israel	6044
USA	Israel	26316
USA	Italy	500397815
USA	Italy	651709
USA	Japan	19211634
USA	Japan	517634
USA	Jordan	2572
USA	Mexico	1590756
USA	Netherlands	2325
USA	New Caledonia	4136
USA	Norway	103781266
USA	Norway	11163
USA	Other Asia, nes	542097
USA	Other Asia, nes	17799
USA	Panama	41356
USA	Peru	5640
USA	Philippines	166747
USA	Poland	21207
USA	Portugal	8663
USA	Portugal	3188
USA	Rep. of Korea	248718380
USA	Rep. of Korea	3619
USA	Russian Federation	602917498
USA	Saint Kitts and Nevis	3800
USA	Saudi Arabia	2421679
USA	Singapore	35894748
USA	Singapore	2300
USA	South Africa	1489766420
USA	Spain	33169
USA	Switzerland	86834599
USA	Switzerland	107025
USA	Thailand	348809
USA	United Kingdom	219557648
USA	United Kingdom	351107
USA	Venezuela	32791
USA	Viet Nam	203309
Viet Nam	Areas, nes	228
Viet Nam	Areas, nes	4968
Viet Nam	Australia	45350
Viet Nam	China	276015
Viet Nam	China, Hong Kong SAR	126443
Viet Nam	France	13361
Viet Nam	France	6982
Viet Nam	Germany	363
Viet Nam	India	1397
Viet Nam	Indonesia	108925
Viet Nam	Italy	126844
Viet Nam	Japan	10928608
Viet Nam	Japan	272031
Viet Nam	Rep. of Korea	15000
Viet Nam	USA	1050790
Zambia	South Africa	39.943
Zambia	South Africa	43677.4
Zimbabwe	China	1928
Zimbabwe	China, Hong Kong SAR	2250
Zimbabwe	Germany	147.29
[truncated: 3 more rows]

## Sheet: 2016
source	target	weight
Algeria	China	736
Algeria	China	407823
Algeria	Germany	209
Algeria	India	2891
Algeria	Italy	8
Algeria	USA	347
Andorra	Andorra	733.755
Andorra	China	37.262
Andorra	France	2063.55
Andorra	Germany	971.795
Andorra	Spain	3902.31
Andorra	Spain	29871.8
Andorra	Switzerland	134.927
Angola	China, Hong Kong SAR	1.26
Angola	Dem. Rep. of the Congo	344
Angola	Japan	1160.12
Angola	Namibia	27.6
Angola	Portugal	58.66
Angola	Portugal	11.85
Angola	Rep. of Korea	19671.6
Angola	Spain	2845.44
Angola	USA	848.98
Antigua and Barbuda	China	25037
Antigua and Barbuda	Other Asia, nes	181
Antigua and Barbuda	USA	1290
Argentina	Austria	25452.8
Argentina	Belgium	2.64815e+06
Argentina	Czechia	22486.5
Argentina	Germany	1.22931e+06
Argentina	Rep. of Korea	833754
Argentina	South Africa	2.8667e+06
Argentina	United Kingdom	3.42784e+07
Argentina	USA	3.78053e+06
Armenia	China, Hong Kong SAR	3163
Armenia	Germany	827
Armenia	Germany	6127
Armenia	Switzerland	30020
Aruba	Areas, nes	7270.37
Aruba	Areas, nes	285999
Aruba	USA	43949.7
Australia	Australia	1441
Australia	Australia	491411
Australia	Austria	170081
Australia	Canada	17797
Australia	Canada	3021
Australia	China	2950861
Australia	China, Hong Kong SAR	223783
Australia	Cook Isds	1136
Australia	Denmark	2564
Australia	Fiji	2239
Australia	France	40112
Australia	French Polynesia	1010
Australia	Germany	3662558
Australia	Indonesia	1417
Australia	Italy	273793
Australia	Italy	11393
Australia	Japan	227774
Australia	Japan	39778
Australia	Jordan	789
Australia	New Zealand	635213
Australia	New Zealand	3714
Australia	Philippines	47188
Australia	Russian Federation	1620256
Australia	Singapore	3296
Australia	South Africa	2011295
Australia	Spain	13524
Australia	Spain	15098
Australia	Switzerland	6882963
Australia	Switzerland	5816
Australia	Thailand	4702
Australia	Thailand	33912
Australia	United Arab Emirates	3143
Australia	United Arab Emirates	24177
Australia	United Kingdom	10716194
Australia	United Kingdom	10550
Australia	USA	4592149
Australia	USA	234844
Austria	Australia	5312.57
Austria	Belgium	392662
Austria	Brazil	66.393
Austria	Canada	98892.8
Austria	Canada	358.524
Austria	China	546296
Austria	China, Hong Kong SAR	13766.6
Austria	Croatia	11260.3
Austria	Czechia	125393
Austria	Denmark	2080.32
Austria	Dominican Rep.	6883.88
Austria	Finland	10765.7
Austria	France	50081.5
Austria	France	7241.29
Austria	French Polynesia	441.515
Austria	Germany	3.18906e+07
Austria	Germany	960465
Austria	Greece	43276.2
Austria	Hungary	116122
Austria	Hungary	1618.89
Austria	India	74.139
Austria	Indonesia	333.073
Austria	Italy	849905
Austria	Italy	451501
Austria	Japan	1.67201e+07
Austria	Japan	4127.45
Austria	Lithuania	4790.27
Austria	Malta	6529.78
Austria	Netherlands	22683.3
Austria	Netherlands	2872.61
Austria	Other Asia, nes	284.384
Austria	Poland	32884.6
Austria	Portugal	15908.9
Austria	Romania	1852.37
Austria	Singapore	451.474
Austria	Slovakia	38509.2
Austria	Slovenia	336064
Austria	Spain	8627.8
Austria	Spain	1336.72
Austria	Sweden	697272
Austria	Sweden	11712.9
Austria	Switzerland	5.60364e+07
Austria	Switzerland	561.023
Austria	Thailand	21187.2
Austria	Türkiye	128.36
Austria	United Kingdom	9.92404e+06
Austria	United Kingdom	22523.9
Austria	USA	79141.9
Austria	USA	54195.7
Azerbaijan	Spain	31.47
Bahamas	USA	186
Bahamas	USA	108933
Bahrain	China	18097.2
Bahrain	Germany	788.057
Bahrain	India	9014.35
Bahrain	India	1667.63
Bahrain	Japan	20679.7
Bahrain	Kuwait	669.866
Bahrain	Türkiye	223.59
Bahrain	United Arab Emirates	9490.22
Bahrain	United Kingdom	17613.9
Bahrain	USA	105.558
Bahrain	Viet Nam	83.298
Barbados	Canada	208
Barbados	China	300
Barbados	China	974017
Barbados	China, Hong Kong SAR	1971
Barbados	Dominican Rep.	178
Barbados	India	1076
Barbados	Italy	4232
Barbados	Japan	1689
Barbados	Other Asia, nes	15955
Barbados	Switzerland	145
Barbados	Thailand	10443
Barbados	United Kingdom	119
Barbados	USA	1832
Barbados	USA	32975
Belgium	Austria	71197.4
Belgium	Canada	14198.1
Belgium	China	15128.5
Belgium	China, Hong Kong SAR	11180.8
Belgium	Czechia	221835
Belgium	Denmark	18976.5
Belgium	France	324892
Belgium	France	82200.6
Belgium	Germany	1.35593e+07
Belgium	Germany	27477.7
Belgium	Greece	1347.3
Belgium	India	2981.85
Belgium	Ireland	412.257
Belgium	Israel	6340.47
Belgium	Italy	426173
Belgium	Italy	185.383
Belgium	Japan	148.74
Belgium	Luxembourg	33059.5
Belgium	Netherlands	323745
Belgium	Other Europe, nes	79.018
Belgium	Poland	14496.6
Belgium	Portugal	135599
Belgium	Romania	1491.42
Belgium	Singapore	2236.95
Belgium	South Africa	1.04955e+06
Belgium	Spain	266.615
Belgium	Switzerland	1.21355e+06
Belgium	Switzerland	110375
Belgium	Thailand	272.016
Belgium	Türkiye	164.876
Belgium	United Kingdom	4.51393e+06
Belgium	USA	220093
Belgium	USA	5276.76
Benin	France	320.532
Bermuda	USA	398
Bermuda	USA	2042
Bolivia (Plurinational State of)	USA	25648.7
Bosnia Herzegovina	China	7483
Bosnia Herzegovina	Germany	1712
Bosnia Herzegovina	Italy	1991
Bosnia Herzegovina	Italy	93
Bosnia Herzegovina	Slovenia	1975
Bosnia Herzegovina	United Kingdom	5660
Botswana	Eswatini	131
Botswana	Latvia	2
Botswana	Singapore	25
Botswana	South Africa	1101
Botswana	South Africa	2440
Botswana	USA	136
Brazil	Belgium	26745122
Brazil	China	5130
Brazil	Czechia	13036
Brazil	France	956
Brazil	Germany	3765839
Brazil	Germany	1617
Brazil	Italy	59723
Brazil	Japan	607597
Brazil	Norway	917766
Brazil	Rep. of Korea	162
Brazil	Russian Federation	56631250
Brazil	South Africa	27198075
Brazil	Switzerland	550
Brazil	Thailand	455
Brazil	United Kingdom	36405035
Brazil	USA	4166974
Brazil	USA	1493
Brunei Darussalam	Germany	11825
Brunei Darussalam	Malaysia	424
Brunei Darussalam	Switzerland	1245
Bulgaria	Austria	9234.2
Bulgaria	China	81176.5
Bulgaria	Germany	73029.8
Bulgaria	Spain	1014.02
Bulgaria	Türkiye	4379.57
Bulgaria	United Kingdom	1.89855e+06
Bulgaria	USA	627.188
Burkina Faso	Côte d'Ivoire	15
Burundi	China	322
Burundi	Egypt	121
Cameroon	China	3732
Canada	Australia	137712
Canada	Australia	11895.2
Canada	Austria	9642.75
Canada	Austria	330.505
Canada	Belgium	7.07422e+06
Canada	Cameroon	265.611
Canada	Canada	652057
Canada	Canada	8848.18
Canada	China	18576.2
Canada	China	1.19293e+06
Canada	China, Hong Kong SAR	27645.5
Canada	Czechia	3052.27
Canada	Czechia	341.069
Canada	Denmark	4780.25
Canada	El Salvador	1834.38
Canada	France	22861.4
Canada	France	49654.2
Canada	French Polynesia	165406
Canada	Germany	2.33063e+06
Canada	Germany	5661.6
Canada	India	9040.6
Canada	Indonesia	3553.31
Canada	Indonesia	7981.92
Canada	Ireland	11874
Canada	Italy	4.5753e+06
Canada	Italy	16758.4
Canada	Japan	1.73783e+06
Canada	Japan	17826.1
Canada	Mexico	1102.44
Canada	Netherlands	4130.56
Canada	Netherlands	2425.97
Canada	Norway	4.36612e+06
Canada	Other Asia, nes	10859.9
Canada	Other Asia, nes	169.025
Canada	Philippines	74.703
Canada	Rep. of Korea	1.71499e+06
Canada	Rep. of Korea	184.872
Canada	Russian Federation	3.95183e+07
Canada	Singapore	826.263
Canada	South Africa	3.74171e+07
Canada	Spain	23416.1
Canada	Switzerland	6.62645e+07
Canada	Switzerland	91.304
Canada	Thailand	6748.19
Canada	Türkiye	3927.58
Canada	Türkiye	180.344
Canada	Ukraine	2183.75
Canada	United Kingdom	5.82324e+07
Canada	United Kingdom	856.446
Canada	USA	4.09935e+07
Canada	USA	1.65669e+06
Canada	Viet Nam	7562.38
Chile	Areas, nes	1816.33
Chile	Areas, nes	2509.73
Chile	Austria	11939.6
Chile	Brazil	808.7
Chile	Canada	4235.49
Chile	China	1202.14
Chile	Costa Rica	782.55
Chile	Germany	18852.8
Chile	Italy	34171.9
Chile	Italy	195.61
Chile	Japan	1788.08
Chile	Lithuania	253.63
Chile	Spain	52028.2
Chile	Switzerland	587.07
Chile	Switzerland	32.04
Chile	United Kingdom	1029.91
Chile	USA	288.34
Chile	USA	5842.12
China	Areas, nes	2475683
China	Australia	776096
China	Australia	6439
China	Austria	99704
China	Belgium	34119627
China	Canada	366286
China	China	912271
China	China	462288
China	China, Hong Kong SAR	39850378
China	China, Hong Kong SAR	160339
China	China, Macao SAR	138
China	Denmark	1422
China	France	35809
China	France	81769
China	French Polynesia	66
China	Germany	35534349
China	Germany	252
China	India	197
China	Indonesia	868
China	Ireland	76097
China	Italy	8568363
China	Italy	36627
China	Japan	404770480
China	Japan	727878
China	Malaysia	16430
China	Mauritius	4118
China	Netherlands	49055
China	Netherlands	860
China	Norway	747362
China	Other Asia, nes	12522088
China	Other Asia, nes	13445
China	Philippines	28
China	Philippines	375
China	Portugal	167641
China	Rep. of Korea	3705306
China	Rep. of Korea	7447
China	Russian Federation	165655314
China	Russian Federation	72
China	Singapore	16738051
China	South Africa	1664752186
China	Spain	516
China	Switzerland	57395162
China	Switzerland	67
China	Thailand	2455
China	United Kingdom	168336359
China	United Kingdom	704
China	USA	31401748
China	USA	128998
China	Viet Nam	1792811
China, Hong Kong SAR	Armenia	4.74216e+07
China, Hong Kong SAR	Australia	6865.68
China, Hong Kong SAR	Australia	92088.3
China, Hong Kong SAR	Austria	183.581
China, Hong Kong SAR	Belgium	254046
China, Hong Kong SAR	Canada	294491
China, Hong Kong SAR	China	904866
China, Hong Kong SAR	China	7.02043e+06
China, Hong Kong SAR	China, Macao SAR	20591.4
China, Hong Kong SAR	Denmark	322.845
China, Hong Kong SAR	France	29284.5
China, Hong Kong SAR	France	2433.97
China, Hong Kong SAR	Germany	8.55481e+07
China, Hong Kong SAR	Germany	711745
China, Hong Kong SAR	India	5.68362e+08
China, Hong Kong SAR	Italy	3.20582e+06
China, Hong Kong SAR	Italy	277386
China, Hong Kong SAR	Japan	3.00143e+08
China, Hong Kong SAR	Japan	3.69489e+06
China, Hong Kong SAR	Malaysia	33869.3
China, Hong Kong SAR	Morocco	9771.29
China, Hong Kong SAR	Netherlands	1.76099e+06
China, Hong Kong SAR	Other Asia, nes	432561
China, Hong Kong SAR	Other Asia, nes	1.65138e+06
China, Hong Kong SAR	Poland	12378.5
China, Hong Kong SAR	Rep. of Korea	3.00722e+06
China, Hong Kong SAR	Rep. of Korea	12842.2
China, Hong Kong SAR	Russian Federation	2.5626e+08
China, Hong Kong SAR	Singapore	2.21471e+06
China, Hong Kong SAR	Singapore	321736
China, Hong Kong SAR	South Africa	5.25586e+08
China, Hong Kong SAR	Spain	2330.52
China, Hong Kong SAR	Spain	47635.7
China, Hong Kong SAR	Sweden	2244.46
China, Hong Kong SAR	Switzerland	6.64121e+08
China, Hong Kong SAR	Switzerland	6.46748e+06
China, Hong Kong SAR	Thailand	21825.6
China, Hong Kong SAR	Thailand	48483.5
China, Hong Kong SAR	United Arab Emirates	5.98272e+08
China, Hong Kong SAR	United Kingdom	5.67017e+08
China, Hong Kong SAR	United Kingdom	333580
China, Hong Kong SAR	USA	2.02372e+07
China, Hong Kong SAR	USA	3.01086e+06
China, Macao SAR	China	876
China, Macao SAR	China, Hong Kong SAR	7907
China, Macao SAR	Japan	733508
Colombia	China	14318
Colombia	Italy	18724
Colombia	Mexico	1307
Colombia	Spain	19026
Colombia	Switzerland	1327
Colombia	United Kingdom	4628
Colombia	USA	19040
Congo	China	1448.38
Costa Rica	Areas, nes	1705
Costa Rica	Areas, nes	9544
Costa Rica	China	331094
Costa Rica	China	245
Costa Rica	China, Hong Kong SAR	36103
Costa Rica	China, Hong Kong SAR	4698
Costa Rica	France	582102
Costa Rica	Japan	22228
Costa Rica	Mexico	2785
Costa Rica	Other Asia, nes	142
Costa Rica	Panama	3116
Costa Rica	Spain	24667
Costa Rica	Sweden	8655
Costa Rica	Switzerland	616760
Costa Rica	USA	6966483
Costa Rica	USA	10106
Côte d'Ivoire	Andorra	101.201
Côte d'Ivoire	China	241.408
Côte d'Ivoire	Ethiopia	43.01
Côte d'Ivoire	Italy	220.697
Côte d'Ivoire	Italy	34.601
Côte d'Ivoire	Mali	414.687
Côte d'Ivoire	Uganda	20.24
Croatia	Austria	62990
Croatia	China	21967
Croatia	Germany	43413
Croatia	Germany	76
Croatia	Slovenia	32836
Croatia	Slovenia	25820
Cuba	Panama	9.1
Cuba	Panama	883.58
Cuba	Spain	1282.29
Cyprus	China	1703.52
Cyprus	China	298.864
Cyprus	China, Hong Kong SAR	1295.08
Cyprus	Germany	11462
Cyprus	Italy	8843.05
Cyprus	Italy	1647.07
Cyprus	Lebanon	15018.5
Cyprus	United Kingdom	413.982
Cyprus	USA	8349.37
Czechia	Areas, nes	1116
Czechia	Australia	1366
Czechia	Austria	348411
Czechia	Bahamas	58998
Czechia	Belgium	6285
Czechia	Canada	945
Czechia	China	102487
Czechia	China, Hong Kong SAR	4572
Czechia	Germany	6602548
Czechia	Germany	10219
Czechia	Greece	313
Czechia	Hungary	2905
Czechia	Italy	1410861
Czechia	Netherlands	909
Czechia	Netherlands	1144
Czechia	Norway	15884
Czechia	Other Asia, nes	1427
Czechia	Poland	314
Czechia	Russian Federation	19439701
Czechia	Slovakia	137642
Czechia	Slovakia	13985
Czechia	Slovenia	57
Czechia	South Africa	1005725
Czechia	Spain	396
Czechia	Switzerland	631679
Czechia	Switzerland	23567
Czechia	Thailand	286
Czechia	Türkiye	6103
Czechia	United Kingdom	3683688
Czechia	United Kingdom	3065
Czechia	USA	407428
Czechia	USA	2090
Dem. Rep. of the Congo	China	256.112
Denmark	Antigua and Barbuda	2517.91
Denmark	Australia	21471.9
Denmark	Austria	31917.6
Denmark	Austria	3884.81
Denmark	Bulgaria	1942.92
Denmark	China	38400.9
Denmark	China, Hong Kong SAR	4472.72
Denmark	Croatia	395.954
Denmark	Czechia	11664.1
Denmark	Estonia	10358.1
Denmark	Finland	623.126
Denmark	Finland	1176.42
Denmark	France	345.884
Denmark	France	81522.4
Denmark	French Polynesia	310904
Denmark	Germany	3.36818e+06
Denmark	Germany	413342
Denmark	Greece	207.114
Denmark	Greece	147.238
Denmark	India	15734.8
Denmark	Indonesia	539.33
Denmark	Ireland	713874
Denmark	Ireland	938.998
Denmark	Italy	24593.3
Denmark	Japan	37359.5
Denmark	Kiribati	3549.03
Denmark	Latvia	21018.2
Denmark	Latvia	17.829
Denmark	Lithuania	18030.2
Denmark	Lithuania	8.915
Denmark	Luxembourg	88.254
Denmark	Malta	2101.01
Denmark	Netherlands	255.996
Denmark	Netherlands	35.807
Denmark	Portugal	1159.04
Denmark	Portugal	46.207
Denmark	Romania	46.653
Denmark	Singapore	1897.46
Denmark	Slovakia	2475.12
Denmark	Slovenia	1707.13
Denmark	Spain	2711.8
Denmark	Spain	11.589
Denmark	Sweden	2406.48
Denmark	Sweden	6314.02
Denmark	Switzerland	701156
Denmark	Thailand	138.918
Denmark	United Kingdom	728752
Denmark	United Kingdom	18715.8
Denmark	USA	172820
Denmark	USA	1499.72
Denmark	Viet Nam	2272.02
Dominica	USA	8.519
Dominican Rep.	Spain	2529.07
Dominican Rep.	USA	3.19674e+07
Dominican Rep.	USA	78.288
Ecuador	China	10188
Ecuador	Panama	12945
Ecuador	Spain	17186
Ecuador	USA	2540
Ecuador	USA	260
Egypt	China	625.606
Egypt	France	63.41
Egypt	Germany	448.068
Egypt	Greece	67.975
Egypt	United Kingdom	289611
Egypt	USA	468.556
El Salvador	China	1351.81
El Salvador	Rep. of Korea	253.31
El Salvador	Spain	4010.91
El Salvador	USA	547.02
El Salvador	USA	251.95
Estonia	China	84909.9
Estonia	Finland	550.334
Estonia	Germany	2.00071e+06
Estonia	Other Europe, nes	627450
Estonia	Switzerland	182.744
Estonia	United Kingdom	4.88178e+06
Estonia	USA	512.59
Eswatini	Rwanda	40.112
Eswatini	South Africa	24.782
Ethiopia	China	77059.9
Ethiopia	Germany	1015.67
Ethiopia	USA	647.293
Fiji	Australia	602.639
Fiji	China	18231.5
Finland	Austria	405
Finland	Bulgaria	118285
Finland	China	205311
Finland	China, Hong Kong SAR	11097
Finland	Denmark	422
Finland	Denmark	172
Finland	Estonia	2249
Finland	France	51699
Finland	France	597
Finland	Germany	67384
Finland	Germany	1000
Finland	India	34
Finland	Norway	36866
Finland	Poland	1921463
Finland	Sweden	256735
Finland	Sweden	4929
Finland	Switzerland	349143
Finland	Thailand	1954
Finland	United Kingdom	267761
Finland	USA	26963
Finland	USA	460
France	Andorra	28781
France	Areas, nes	584438
France	Areas, nes	26863
France	Australia	2548
France	Australia	687
France	Austria	369579
France	Austria	1385
France	Belgium	2064446
France	Belgium	8
France	Canada	76751
France	China	20012
France	China	637137
France	China, Hong Kong SAR	96
France	China, Hong Kong SAR	346795
France	Côte d'Ivoire	33
France	Czechia	395272
France	Denmark	38647
France	Denmark	14590
France	French Polynesia	15470
France	Germany	30803279
France	Germany	20792
France	Hungary	13657
France	Ireland	3392
France	Israel	246
France	Italy	20623357
France	Italy	587115
France	Japan	1116390
France	Japan	95812
France	Luxembourg	4824
France	Mexico	1237
France	Netherlands	12856
France	Other Asia, nes	503
France	Philippines	29815
France	Spain	8162584
France	Spain	739
France	Switzerland	33115107
France	Switzerland	15320
France	Thailand	4895
France	Thailand	2161
France	Türkiye	347
France	United Kingdom	5966369
France	United Kingdom	2091
France	USA	14368731
France	USA	838262
France	Viet Nam	72
France	Viet Nam	253
French Polynesia	Areas, nes	953.248
French Polynesia	Germany	107.414
Gabon	France	81.375
Georgia	China	27.14
Georgia	Germany	411.87
Georgia	Germany	75.98
Georgia	USA	129.61
Germany	Argentina	1125.3
Germany	Australia	14343.4
Germany	Australia	2341.33
Germany	Austria	4.44838e+07
Germany	Austria	15993.2
Germany	Belgium	2.47585e+08
Germany	Belgium	534.434
Germany	Brazil	2.63435e+06
Germany	Canada	147830
Germany	Canada	316.456
Germany	China	611236
Germany	China	4.83488e+06
Germany	China, Hong Kong SAR	488160
Germany	Croatia	1.59438e+06
Germany	Cyprus	1.78728e+07
Germany	Czechia	2.75218e+07
Germany	Denmark	666586
Germany	Denmark	5394.14
Germany	Estonia	1.16141e+06
Germany	Finland	1757.11
Germany	Finland	236.789
Germany	France	7.87734e+07
Germany	France	91807.6
Germany	French Polynesia	40345.9
Germany	Greece	1725.02
Germany	Hungary	23283.9
Germany	Iceland	18024.7
Germany	India	57092.6
Germany	Indonesia	28288.5
Germany	Indonesia	1713.95
Germany	Iran	224617
Germany	Ireland	486953
Germany	Ireland	4004.39
Germany	Israel	10232.8
Germany	Israel	2463.05
Germany	Italy	3.08239e+07
Germany	Italy	16487.8
Germany	Japan	3.2464e+07
Germany	Japan	117142
Germany	Latvia	2.67888e+06
Germany	Lithuania	5.94869e+06
Germany	Luxembourg	1.84183e+06
Germany	Malaysia	316750
Germany	Mexico	1.26182e+07
Germany	Netherlands	1.37188e+07
Germany	Netherlands	67540.1
Germany	Norway	2.62168e+07
Germany	Norway	11943.4
Germany	Other Asia, nes	5.17361e+06
Germany	Philippines	2020.45
Germany	Philippines	151.589
Germany	Poland	6.38264e+06
Germany	Portugal	300544
Germany	Rep. of Korea	2.23808e+07
Germany	Romania	4.48645e+06
Germany	Russian Federation	2.57896e+08
Germany	Singapore	3.181e+06
Germany	Slovakia	8.57643e+06
Germany	Slovenia	11327.1
Germany	South Africa	7.95029e+08
Germany	Spain	5.07887e+06
Germany	Sweden	44915.7
Germany	Sweden	439.276
Germany	Switzerland	2.57474e+08
Germany	Switzerland	31942.1
Germany	Thailand	14209.5
Germany	Türkiye	12067.4
Germany	Türkiye	5182.8
Germany	Ukraine	325929
Germany	United Arab Emirates	2615.74
Germany	United Arab Emirates	591.972
Germany	United Kingdom	6.51256e+08
Germany	United Kingdom	183.677
Germany	USA	2.61167e+08
Germany	USA	77732
Germany	Viet Nam	896.256
Ghana	China	692
Ghana	South Africa	7
Ghana	USA	545
Greece	Austria	56132
Greece	China	2518
Greece	China, Hong Kong SAR	44065
Greece	Cyprus	2897
Greece	France	1575
Greece	Germany	18158
Greece	Germany	209
Greece	Italy	23788
Greece	Italy	3854
Greece	Poland	854
Greece	Spain	8978
Greece	Switzerland	46128
Greece	United Kingdom	1247
Greece	USA	8446
Greece	USA	2651
Greenland	Denmark	73.29
Grenada	USA	402.592
Grenada	USA	69.259
Guatemala	China	1932
Guatemala	Netherlands	20422
Guatemala	Spain	1491
Guatemala	USA	6737
Guatemala	USA	1131
Honduras	China	11571
Honduras	Spain	63
Honduras	USA	4959
Hungary	China	3352
Hungary	China, Hong Kong SAR	11901
Hungary	Germany	205299
Hungary	Germany	7989
Hungary	Italy	82798
Hungary	Italy	2
Hungary	Philippines	1000
Hungary	Switzerland	52328
Hungary	Thailand	172
Hungary	United Kingdom	25402
Hungary	USA	29312
Hungary	USA	90
Iceland	Belgium	6753
Iceland	Canada	170
Iceland	China	670
Iceland	Germany	55288
Iceland	Italy	9797
Iceland	USA	26126
India	Belgium	16149931
India	Canada	5107
India	China	25374
India	China	1134
India	China, Hong Kong SAR	356231
India	China, Hong Kong SAR	9330
India	Czechia	429415
India	Egypt	80063
India	France	17546
India	Germany	10602685
India	Italy	2658658
India	Japan	2876608
India	Netherlands	10248
India	Other Asia, nes	3973
India	Russian Federation	3519558
India	Singapore	19994
India	South Africa	78922253
India	Spain	350754
India	Switzerland	9008285
India	United Arab Emirates	242346
India	United Kingdom	30226889
India	USA	25218993
India	USA	938
Indonesia	Australia	10170
Indonesia	Austria	1030
Indonesia	China	2580
Indonesia	China	653
Indonesia	China, Hong Kong SAR	64706
Indonesia	Czechia	617
Indonesia	Germany	5656
Indonesia	India	4398
Indonesia	Italy	60514
Indonesia	Japan	45408
Indonesia	Malaysia	472
Indonesia	Norway	421
Indonesia	Other Asia, nes	2411
Indonesia	Rep. of Korea	316605
Indonesia	Singapore	24748
Indonesia	Spain	1182
Indonesia	Switzerland	2098
Indonesia	Thailand	34667
Indonesia	USA	758
Indonesia	Viet Nam	490
Iran	Germany	17551
Iran	Other Asia, nes	220206
Ireland	Afghanistan	2817.07
Ireland	Areas, nes	68829.4
Ireland	Australia	5776.93
Ireland	Austria	716.166
Ireland	Canada	1162.25
Ireland	Canada	132.828
Ireland	China	35552.6
Ireland	China, Hong Kong SAR	4541.62
Ireland	Germany	1.62424e+08
Ireland	Italy	67677.2
Ireland	Netherlands	2.92736e+06
Ireland	Switzerland	112881
Ireland	Türkiye	16.604
Ireland	United Arab Emirates	54.238
Ireland	United Kingdom	1.85327e+06
Ireland	United Kingdom	45037.7
Ireland	USA	1.75521e+07
Ireland	USA	14245.8
Israel	China	1000
Israel	China	31000
Israel	China, Hong Kong SAR	73000
Israel	Czechia	32000
Israel	France	104000
Israel	Germany	303000
Israel	Greece	1000
Israel	India	13000
Israel	Italy	15000
Israel	Other Asia, nes	6000
Israel	Philippines	20000
Israel	Rep. of Korea	45000
Israel	Spain	3000
Israel	Spain	1000
Israel	Switzerland	300000
Israel	Thailand	4000
Israel	Türkiye	1000
Israel	United Kingdom	355000
Israel	USA	2042000
Israel	USA	1000
Italy	Australia	5428.4
Italy	Austria	961789
Italy	Belgium	7.02319e+06
Italy	Belgium	5563.37
Italy	Bulgaria	31860.2
Italy	China	1515.57
Italy	China	1.11366e+06
Italy	China, Hong Kong SAR	2850.82
Italy	China, Hong Kong SAR	30152.1
Italy	Croatia	3.31421e+06
Italy	Czechia	3.00563e+06
Italy	Denmark	30791.6
Italy	Egypt	151916
Italy	France	1.56049e+07
Italy	France	79930.4
Italy	French Polynesia	1.3939e+06
Italy	Germany	2.50311e+08
Italy	Germany	69037.1
Italy	Greece	225.676
Italy	Hungary	17081.7
Italy	India	11224.1
Italy	Ireland	472.372
Italy	Israel	185851
Italy	Japan	11367.9
Italy	Japan	214615
Italy	Latvia	3074.29
Italy	Lithuania	375117
Italy	Luxembourg	12500.7
Italy	Mexico	12589.2
Italy	Netherlands	710233
Italy	Netherlands	1838.6
Italy	Paraguay	219360
Italy	Philippines	146040
Italy	Poland	105598
Italy	Poland	8156.44
Italy	Portugal	41697.1
Italy	Portugal	88789.3
Italy	Rep. of Korea	1.42578e+07
Italy	Romania	191415
Italy	Romania	134.963
Italy	Russian Federation	4.64274e+08
Italy	Slovakia	282278
Italy	Slovenia	1496.77
Italy	South Africa	2.05786e+08
Italy	Spain	1.44678e+06
Italy	Spain	83844.3
Italy	Sweden	4.28678e+06
Italy	Switzerland	1.67744e+08
Italy	Thailand	28267.1
Italy	United Kingdom	9.42974e+07
Italy	United Kingdom	3360.81
Italy	USA	2.71225e+07
Italy	USA	88267.2
Italy	Viet Nam	59927.1
Jamaica	China	5158
Jamaica	Dominican Rep.	11448
Jamaica	Mexico	50
Jamaica	USA	4938
Japan	Armenia	1777450
Japan	Australia	11108320
Japan	Austria	83620
Japan	Belgium	630842
Japan	Belgium	8344
Japan	Canada	10065
Japan	China	19173781
Japan	China	2758089
Japan	China, Hong Kong SAR	39781
Japan	Denmark	20387
Japan	France	270281
Japan	French Polynesia	22899
Japan	Germany	48729608
Japan	Germany	27379
Japan	India	4195
Japan	Indonesia	215347
Japan	Italy	10473320
Japan	Italy	20728
Japan	Lebanon	1849
Japan	Malaysia	207214
Japan	Mauritius	2364
Japan	Norway	33565249
Japan	Other Asia, nes	44640100
Japan	Other Asia, nes	40756
Japan	Philippines	2272277
Japan	Philippines	32964
Japan	Rep. of Korea	21075497
Japan	Rep. of Korea	80225
Japan	Russian Federation	420908908
Japan	Singapore	82829
Japan	Singapore	11500
Japan	South Africa	2020250962
Japan	Sri Lanka	16983
Japan	Switzerland	96065972
Japan	Thailand	5649
Japan	Thailand	58467
Japan	United Kingdom	92610718
Japan	United Kingdom	15815
Japan	USA	36686705
Japan	USA	77410
Japan	Viet Nam	351913
Japan	Viet Nam	13543
Jordan	Italy	89732
Jordan	Thailand	2663
Jordan	USA	11239
Kazakhstan	Armenia	84241
Kazakhstan	China	28983
Kazakhstan	Germany	23956
Kazakhstan	Japan	327
Kazakhstan	Other Asia, nes	62
Kazakhstan	Russian Federation	44755
Kazakhstan	Russian Federation	5309
Kazakhstan	USA	1051
Kenya	Canada	5609.14
Kenya	India	429.61
Kenya	South Africa	13903.8
Kenya	South Africa	4250.09
Kenya	Thailand	23.97
Kuwait	China	2412.42
Kuwait	Germany	32142.4
Kuwait	Germany	201.862
Kuwait	Italy	20335.1
Kuwait	Malaysia	15384.5
Kuwait	Switzerland	14467.9
Kuwait	USA	66677.3
Kyrgyzstan	China	3118
Kyrgyzstan	Germany	774
Kyrgyzstan	Russian Federation	3089
Kyrgyzstan	USA	4104
Lao People's Dem. Rep.	USA	287891
Latvia	Austria	3439.59
Latvia	China	71927.1
Latvia	China, Hong Kong SAR	11588.8
Latvia	Estonia	23860.3
Latvia	Germany	929642
Latvia	Germany	18.808
Latvia	India	620.653
Latvia	Israel	188.077
Latvia	Italy	747.881
Latvia	Lebanon	406.024
Latvia	Russian Federation	107110
Latvia	Spain	31658.8
Latvia	Switzerland	11984.9
Latvia	United Kingdom	33382.5
Lebanon	Austria	4436
Lebanon	China	6912
Lebanon	France	28
Lebanon	France	12170
Lebanon	Germany	10667
Lebanon	Switzerland	241973
Lebanon	USA	125
Lesotho	South Africa	267.682
Lesotho	South Africa	52.338
Libya	China	3483
Libya	Spain	2218
Lithuania	China	4048
Lithuania	China, Hong Kong SAR	19
Lithuania	Estonia	304768
Lithuania	France	9895
Lithuania	Germany	2971
Lithuania	Germany	299
Lithuania	Italy	711
Lithuania	Poland	11732
Lithuania	United Kingdom	2580
Lithuania	USA	9
Luxembourg	Belgium	8865
Luxembourg	Belgium	4583
Luxembourg	China	18964
Luxembourg	France	40382
Luxembourg	France	12883
Luxembourg	French Polynesia	4030
Luxembourg	Germany	851256
Luxembourg	Germany	338
Luxembourg	Japan	4868
Luxembourg	Netherlands	1076
Luxembourg	Netherlands	436
Luxembourg	Norway	6694
Luxembourg	Other Europe, nes	209419
Luxembourg	Other Europe, nes	9333
Luxembourg	Switzerland	664123
Luxembourg	Türkiye	283
Luxembourg	United Kingdom	635
Luxembourg	USA	3880
Madagascar	Indonesia	219.204
Malaysia	China	97234116
Malaysia	China	27876
Malaysia	China, Hong Kong SAR	785352
Malaysia	China, Hong Kong SAR	137061
Malaysia	China, Macao SAR	4514
Malaysia	Germany	301901
Malaysia	Japan	2949401
Malaysia	Japan	93739
Malaysia	Other Asia, nes	118723
Malaysia	Rep. of Korea	2718639
Malaysia	Singapore	5075920
Malaysia	Singapore	5553
Malaysia	Sweden	14636
Malaysia	Switzerland	4223512
Malaysia	Thailand	10327
Malaysia	United Kingdom	67798
Malaysia	USA	552165
Malaysia	USA	2405
Maldives	China	24
Maldives	China	4
Maldives	India	1037
Maldives	Singapore	430
Maldives	Thailand	570
Maldives	United Arab Emirates	210
Maldives	USA	63
Mali	China	7620
Mali	France	221
Mali	United Arab Emirates	551
Malta	Austria	92254
Malta	China	997
Malta	China, Hong Kong SAR	12989
Malta	Germany	934
Malta	India	432
Malta	Ireland	18830
Malta	Italy	492
Malta	Italy	4743
Malta	Japan	1311
Malta	Thailand	3727
Malta	United Kingdom	846
Malta	USA	1328
Malta	USA	4016
Mauritius	Denmark	166.092
Mauritius	France	13771.5
Mauritius	Germany	155.512
Mauritius	Italy	123885
Mauritius	South Africa	1606.62
Mauritius	United Arab Emirates	110238
Mauritius	USA	2716.61
Mauritius	USA	337.727
Mexico	China	272335
Mexico	China, Hong Kong SAR	47586
Mexico	Germany	658980
Mexico	Japan	44145
Mexico	Spain	261842
Mexico	United Kingdom	1421336
Mexico	USA	7728618
Mexico	USA	566772
Mongolia	Switzerland	1888
Montenegro	China	1630.73
Montenegro	Germany	102.367
Montenegro	Türkiye	37.869
Morocco	China	6667
Morocco	France	38513
Morocco	India	37
Morocco	Russian Federation	48
Morocco	United Kingdom	650
Mozambique	South Africa	895.54
Namibia	China, Hong Kong SAR	256
Namibia	South Africa	8622
Namibia	South Africa	2674
Nepal	China	17334.6
Nepal	Eswatini	53.096
Nepal	India	6264.96
Nepal	India	3713.56
Nepal	Thailand	638.61
Netherlands	Australia	899.383
Netherlands	Austria	284398
Netherlands	Austria	4635.2
Netherlands	Belgium	386536
Netherlands	Belgium	53.1
Netherlands	Bulgaria	590.739
Netherlands	Bulgaria	23.231
Netherlands	Canada	52665.4
Netherlands	China	75.225
Netherlands	China	46390.7
Netherlands	China, Hong Kong SAR	6716.06
Netherlands	China, Hong Kong SAR	157243
Netherlands	Croatia	153.769
Netherlands	Croatia	14.381
Netherlands	Cyprus	730.127
Netherlands	Czechia	440.288
Netherlands	Czechia	53.1
Netherlands	Denmark	22204.7
Netherlands	Denmark	93121
Netherlands	Estonia	2346.36
Netherlands	Estonia	94.031
Netherlands	Finland	1110.68
Netherlands	Finland	28.763
Netherlands	France	301800
Netherlands	France	13785
Netherlands	Germany	1.34783e+07
Netherlands	Germany	113078
Netherlands	Greece	7509.24
Netherlands	Greece	201.338
Netherlands	Hungary	11653.3
Netherlands	Hungary	817.521
Netherlands	Ireland	870.621
Netherlands	Ireland	36.506
Netherlands	Israel	116.157
Netherlands	Italy	258376
Netherlands	Italy	11026
Netherlands	Japan	198.019
Netherlands	Latvia	532.107
Netherlands	Latvia	155.982
Netherlands	Lithuania	5808.93
Netherlands	Lithuania	18.806
Netherlands	Luxembourg	18648.1
Netherlands	Luxembourg	3.319
Netherlands	Malaysia	100.669
Netherlands	Malta	147.132
Netherlands	Norway	8.85
Netherlands	Philippines	432.545
Netherlands	Poland	172175
Netherlands	Poland	2495.71
Netherlands	Portugal	59755.3
Netherlands	Portugal	4457.09
Netherlands	Romania	488253
Netherlands	Romania	211.294
Netherlands	Singapore	212.4
Netherlands	Slovakia	3472.53
Netherlands	Slovakia	267.713
Netherlands	Slovenia	12937.6
Netherlands	Slovenia	956.908
Netherlands	Spain	59368.1
Netherlands	Spain	3261.23
Netherlands	Sweden	4200.44
Netherlands	Sweden	8.85
Netherlands	Switzerland	619322
Netherlands	Thailand	516.62
Netherlands	Türkiye	518.832
Netherlands	United Kingdom	1.8007e+06
Netherlands	United Kingdom	2568.72
Netherlands	USA	213527
Netherlands	USA	7276.93
New Zealand	Australia	55567
New Zealand	Australia	194293
New Zealand	China	145
New Zealand	China	181686
New Zealand	China, Hong Kong SAR	16478
New Zealand	Cook Isds	5627
New Zealand	France	161
New Zealand	Germany	473672
New Zealand	Germany	561
New Zealand	India	6898
New Zealand	Indonesia	250
New Zealand	Italy	4332
New Zealand	Italy	821
New Zealand	Japan	1720027
New Zealand	Japan	7841
New Zealand	New Zealand	2939
New Zealand	Rep. of Korea	264
New Zealand	Spain	394
New Zealand	Switzerland	71358
New Zealand	Thailand	6198
New Zealand	United Kingdom	1064
New Zealand	USA	500236
New Zealand	USA	8665
New Zealand	Viet Nam	152
Nicaragua	China	5.22
Nicaragua	Spain	0.73
Nicaragua	USA	73.66
Niger	Nigeria	3499.7
Niger	United Kingdom	428.87
Nigeria	China	16244
Nigeria	India	699
Nigeria	USA	31
North Macedonia	China	22542.4
North Macedonia	China	304.04
North Macedonia	Germany	371.56
North Macedonia	Italy	1.06054e+07
North Macedonia	Norway	3367750
North Macedonia	South Africa	1.71523e+08
North Macedonia	United Arab Emirates	748.3
North Macedonia	United Kingdom	6.45384e+08
Norway	Australia	2439
Norway	Belgium	239529
Norway	China	888
Norway	China	119192
Norway	China, Hong Kong SAR	1067
Norway	Denmark	78323
Norway	Denmark	7842
Norway	Ecuador	1049
Norway	Finland	502
Norway	France	2088972
Norway	France	469
Norway	French Polynesia	17542
Norway	Germany	3020709
Norway	Germany	61955
Norway	India	6022
Norway	Indonesia	7024
Norway	Italy	51858
Norway	Italy	1065
Norway	Japan	2654
Norway	Nepal	511
Norway	Poland	198
Norway	Portugal	221
Norway	Russian Federation	658
Norway	South Africa	5714184
Norway	Spain	1260
Norway	Spain	498
Norway	Sweden	26280
Norway	Sweden	531
Norway	Switzerland	23082
Norway	Thailand	916
Norway	Türkiye	13839
Norway	Türkiye	155
Norway	United Kingdom	2828445
Norway	United Kingdom	18678
Norway	USA	388186
Norway	USA	2009
Oman	China	1992.2
Oman	Germany	288.687
Oman	Italy	998.7
Oman	Spain	179.454
Oman	United Arab Emirates	2.456e+06
Oman	United Arab Emirates	240286
Oman	USA	478.544
Other Asia, nes	Areas, nes	2035169
Other Asia, nes	Australia	165745
Other Asia, nes	Belgium	310
Other Asia, nes	Belgium	10307
Other Asia, nes	China	107351
Other Asia, nes	China	1547960
Other Asia, nes	China, Hong Kong SAR	1829656
Other Asia, nes	China, Hong Kong SAR	205792
Other Asia, nes	France	16702
Other Asia, nes	France	993
Other Asia, nes	Germany	33931812
Other Asia, nes	Indonesia	931
Other Asia, nes	Italy	34925
Other Asia, nes	Italy	58177
Other Asia, nes	Japan	58113988
Other Asia, nes	Japan	257388
Other Asia, nes	Malaysia	2840550
Other Asia, nes	Rep. of Korea	1109801
Other Asia, nes	Russian Federation	97541
Other Asia, nes	Singapore	7598021
Other Asia, nes	South Africa	9893837
Other Asia, nes	Spain	683
Other Asia, nes	Switzerland	48895
Other Asia, nes	Switzerland	310
Other Asia, nes	Thailand	62
Other Asia, nes	United Kingdom	5621433
Other Asia, nes	USA	30876281
Other Asia, nes	USA	39550
Pakistan	Switzerland	12768
Pakistan	United Kingdom	11334
Palau	China	496
Palau	Japan	630
Palau	Philippines	1072
Panama	Canada	2471
Panama	Spain	4938
Panama	USA	2517
Panama	USA	432
Paraguay	China	251
Paraguay	Mexico	421
Paraguay	Spain	277
Peru	Australia	14698.1
Peru	Brazil	5849.57
Peru	China	3822.06
Peru	China	4182.09
Peru	India	223.11
Peru	Japan	4.12
Peru	Panama	272.6
Peru	Rep. of Korea	239.82
Peru	Spain	956.64
Peru	USA	548.77
Peru	USA	2144.58
Philippines	Canada	11286
Philippines	Canada	96
Philippines	China	578
Philippines	Italy	552
Philippines	Japan	28740
Philippines	Rep. of Korea	242570
Philippines	Singapore	4677
Philippines	Thailand	4796
Philippines	USA	24742
Philippines	USA	60
Poland	Belgium	5740
Poland	Belgium	127
Poland	China	268444
Poland	China, Hong Kong SAR	104183
Poland	Czechia	269398
Poland	Germany	1627983
Poland	Germany	54
Poland	Ireland	1033188
Poland	Israel	115132
Poland	Italy	64738211
Poland	Netherlands	3542469
Poland	Philippines	224
Poland	Spain	14677
Poland	Switzerland	16107
Poland	Thailand	1027
Poland	United Kingdom	2990366
Poland	USA	155258
Poland	USA	662
Portugal	Australia	1715.9
Portugal	Austria	42305.7
Portugal	China	1668.33
Portugal	China, Hong Kong SAR	9079.58
Portugal	Cyprus	1229.12
Portugal	Czechia	11538.9
Portugal	France	15588.1
Portugal	Germany	3.26792e+06
Portugal	Germany	3414.11
Portugal	Italy	4.11084e+06
Portugal	Italy	85.187
Portugal	Spain	2.01063e+07
Portugal	Spain	73872.4
Portugal	Thailand	1868.58
Portugal	Türkiye	69.698
Portugal	United Kingdom	163978
Portugal	USA	1246.82
Portugal	USA	268.836
Qatar	Areas, nes	19143.2
Qatar	Bahrain	16207.5
Qatar	Bangladesh	80229.5
Qatar	Bulgaria	67209.4
Qatar	Cambodia	120040
Qatar	China	1.77787e+06
Qatar	China, Hong Kong SAR	101178
Qatar	Egypt	41089.3
Qatar	France	244195
Qatar	Germany	365880
Qatar	Germany	72047
Qatar	India	251701
Qatar	Indonesia	33583.7
Qatar	Italy	210467
Qatar	Japan	23612.6
Qatar	Kuwait	36590.5
Qatar	Lebanon	39963.4
Qatar	Mexico	24352.7
Qatar	Pakistan	52751.4
Qatar	Peru	30145.2
Qatar	Portugal	14108.2
Qatar	Rep. of Korea	128199
Qatar	Rep. of Moldova	19742.9
Qatar	Romania	181403
Qatar	Saudi Arabia	15115.9
Qatar	Spain	448757
Qatar	Switzerland	80272.6
Qatar	Thailand	123660
Qatar	Tunisia	83422.2
Qatar	Türkiye	160494
Qatar	United Arab Emirates	271855
Qatar	United Kingdom	500874
Qatar	USA	1.09833e+06
Qatar	Viet Nam	75361.5
Rep. of Korea	Areas, nes	3852
Rep. of Korea	Belgium	3299866
Rep. of Korea	Canada	643
Rep. of Korea	Canada	13
Rep. of Korea	China	67035
Rep. of Korea	China	2412355
Rep. of Korea	China, Hong Kong SAR	19890
Rep. of Korea	China, Hong Kong SAR	7747
Rep. of Korea	Czechia	5900
Rep. of Korea	France	5315
Rep. of Korea	France	127
Rep. of Korea	Germany	16816581
Rep. of Korea	Italy	6395448
Rep. of Korea	Japan	50824455
Rep. of Korea	Japan	134766
Rep. of Korea	Luxembourg	17
Rep. of Korea	Malaysia	22
Rep. of Korea	Netherlands	5387265
Rep. of Korea	Other Asia, nes	219332
Rep. of Korea	Philippines	63421
Rep. of Korea	Philippines	286
Rep. of Korea	Russian Federation	48943886
Rep. of Korea	Singapore	251982
Rep. of Korea	South Africa	101850617
Rep. of Korea	Switzerland	2554647
Rep. of Korea	Thailand	225
Rep. of Korea	Ukraine	235
Rep. of Korea	United Arab Emirates	335
Rep. of Korea	United Kingdom	123207297
Rep. of Korea	USA	32342423
Rep. of Korea	USA	45169
Rep. of Moldova	Germany	123
Rep. of Moldova	Russian Federation	120
Rep. of Moldova	Spain	473
Russian Federation	Belarus	1405054
Russian Federation	China	86334.5
Russian Federation	China, Hong Kong SAR	951.36
Russian Federation	Estonia	1276.42
Russian Federation	Germany	606547
Russian Federation	Germany	20933.3
Russian Federation	Italy	123329
Russian Federation	Italy	22046
Russian Federation	Japan	17774.7
Russian Federation	Kyrgyzstan	31
Russian Federation	Mexico	1096.45
Russian Federation	Netherlands	3425.63
Russian Federation	Other Asia, nes	90.47
Russian Federation	Portugal	226.96
Russian Federation	Rep. of Korea	582.26
Russian Federation	South Africa	75623.6
Russian Federation	Spain	1755.13
Russian Federation	Switzerland	19620.8
Russian Federation	Ukraine	178196
Russian Federation	United Kingdom	527551
Russian Federation	United Kingdom	664.36
Russian Federation	USA	19051.1
Russian Federation	USA	24227.6
Russian Federation	Uzbekistan	1.33016e+06
Rwanda	Belgium	15.782
Rwanda	China	41.937
Saint Kitts and Nevis	USA	278.803
Saint Lucia	China	1116
Saint Lucia	Iceland	80
Saint Lucia	United Kingdom	81
Saint Lucia	USA	171
Saint Vincent and the Grenadines	Canada	259.474
Saint Vincent and the Grenadines	USA	2.819
Samoa	Australia	160
Sao Tome and Principe	Portugal	1139
Saudi Arabia	Singapore	86400.1
Saudi Arabia	Switzerland	252267
Saudi Arabia	Türkiye	28000
Saudi Arabia	United Arab Emirates	1.3728e+06
Saudi Arabia	United Arab Emirates	41866.7
Saudi Arabia	USA	230400
Saudi Arabia	USA	30400
Senegal	China	314
Senegal	China	3024
Senegal	France	6545
Senegal	India	4463
Senegal	Türkiye	1149
Senegal	United Arab Emirates	386
Serbia	Austria	22
Serbia	China	1093
Serbia	China	3159
Serbia	Croatia	745
Serbia	Germany	6746
Serbia	Slovenia	738
Serbia	Slovenia	343
Serbia	Switzerland	3071
Serbia	United Kingdom	14663
Seychelles	Italy	4.134
Singapore	Australia	2716.39
Singapore	Australia	204514
Singapore	Austria	683.983
Singapore	Canada	1.98269e+07
Singapore	China	562096
Singapore	China	6311.46
Singapore	China, Hong Kong SAR	3.8731e+06
Singapore	China, Hong Kong SAR	765849
Singapore	Czechia	5963.32
Singapore	Denmark	771.562
Singapore	Egypt	175.158
Singapore	France	10668.7
Singapore	France	495138
Singapore	French Polynesia	55889
Singapore	Germany	3.95514e+07
Singapore	India	911.253
Singapore	India	303.269
Singapore	Indonesia	6.514
Singapore	Indonesia	153599
Singapore	Italy	232275
Singapore	Italy	332095
Singapore	Japan	5.44498e+07
Singapore	Japan	463481
Singapore	Malaysia	103045
Singapore	Malaysia	70222.2
Singapore	Netherlands	1451.92
Singapore	Other Asia, nes	1.79436e+07
Singapore	Philippines	98.436
Singapore	Philippines	10422.6
Singapore	Rep. of Korea	673.126
Singapore	South Africa	5.90939e+07
Singapore	Switzerland	5.87815e+06
Singapore	Switzerland	1.52994e+06
Singapore	Thailand	21459.7
Singapore	United Kingdom	4.11874e+06
Singapore	United Kingdom	71783.5
Singapore	USA	6.2541e+07
Singapore	USA	40642.3
Singapore	Viet Nam	5240.97
Singapore	Viet Nam	906.187
Slovakia	Areas, nes	346.461
Slovakia	Austria	129719
Slovakia	China	18979
Slovakia	Croatia	758.229
Slovakia	Czechia	142865
Slovakia	Czechia	52061
Slovakia	Germany	1.3286e+07
Slovakia	Germany	11697.8
Slovakia	Italy	184716
Slovakia	Italy	97478.3
Slovakia	Other Asia, nes	939.761
Slovakia	Other Europe, nes	1.49438e+07
Slovakia	Other Europe, nes	6682.37
Slovakia	Poland	37831.7
Slovakia	Spain	81977.2
Slovakia	Switzerland	3922.86
Slovakia	United Kingdom	2.19676e+06
Slovakia	USA	678825
Slovakia	USA	419.516
Slovenia	Australia	901.38
Slovenia	Austria	925470
Slovenia	Belgium	1728.25
Slovenia	China	474.99
Slovenia	China	6517.01
Slovenia	China, Hong Kong SAR	1007.65
Slovenia	Croatia	1657.3
Slovenia	Czechia	7396.78
Slovenia	Germany	40204.2
Slovenia	Germany	7725.54
Slovenia	Italy	1972.9
Slovenia	Italy	37927.7
Slovenia	Slovenia	1295.88
Slovenia	Spain	5786.48
Slovenia	Switzerland	8308.99
Slovenia	United Kingdom	43664
Slovenia	USA	3565.92
South Africa	Areas, nes	1.06306e+06
South Africa	Austria	133.179
South Africa	China	633.696
South Africa	China	200147
South Africa	China, Hong Kong SAR	30786.7
South Africa	Czechia	30545.1
South Africa	Dem. Rep. of the Congo	839.208
South Africa	Denmark	297.329
South Africa	France	8.272
South Africa	Germany	6.8966e+06
South Africa	Indonesia	46.285
South Africa	Italy	232186
South Africa	Other Asia, nes	4280.95
South Africa	South Africa	5.65834e+06
South Africa	Switzerland	212183
South Africa	Thailand	16254.5
South Africa	United Kingdom	512189
South Africa	United Kingdom	453.822
South Africa	USA	3.97879e+06
South Africa	USA	594.453
Spain	Angola	6.395
Spain	Australia	8642.66
Spain	Australia	12410.3
Spain	Austria	2690.52
Spain	Belgium	12024.8
Spain	Belgium	11.065
Spain	China	216404
Spain	China, Hong Kong SAR	1131.32
Spain	China, Hong Kong SAR	2128.91
Spain	Croatia	2267.74
Spain	Czechia	3610.28
Spain	France	701433
Spain	France	2340.2
Spain	Germany	846278
Spain	Germany	19333
Spain	Greece	1339.36
Spain	India	781.796
Spain	Italy	1.38483e+07
Spain	Italy	162118
Spain	Japan	2280.46
Spain	Japan	86132.5
Spain	Netherlands	2408.75
Spain	Netherlands	15042.3
Spain	Other Europe, nes	37922
Spain	Philippines	5047.44
Spain	Poland	9569
Spain	Portugal	2.49051e+07
Spain	Portugal	14880.9
Spain	Romania	16.996
Spain	Switzerland	501211
Spain	Switzerland	9515.75
Spain	Thailand	5417.18
Spain	United Kingdom	2.67881e+06
Spain	United Kingdom	1425.76
Spain	USA	357040
Spain	USA	24875.4
Sri Lanka	China	703
Sri Lanka	China, Hong Kong SAR	279282
Sri Lanka	Germany	143
Sri Lanka	Italy	206
Sri Lanka	Japan	191
Sri Lanka	Switzerland	523
State of Palestine	Israel	385
Sweden	Austria	743342
Sweden	Belgium	37482.4
Sweden	China	1284.44
Sweden	China	231550
Sweden	China, Hong Kong SAR	233.535
Sweden	China, Hong Kong SAR	128795
Sweden	Denmark	22536.1
Sweden	Denmark	6655.75
Sweden	Finland	934.14
Sweden	France	5955.14
Sweden	Germany	1.14712e+06
Sweden	Germany	14829.5
Sweden	Israel	1868.28
Sweden	Italy	1517.98
Sweden	Japan	10275.5
Sweden	Lebanon	116.767
Sweden	Norway	1.71321e+06
Sweden	Norway	116.767
Sweden	Rep. of Korea	583.837
Sweden	Switzerland	342829
Sweden	Switzerland	1050.91
Sweden	Thailand	700.605
Sweden	Thailand	62237.1
Sweden	United Kingdom	342596
Sweden	USA	62937.7
Sweden	USA	6655.75
Sweden	Viet Nam	1284.44
Sweden	Viet Nam	12027.1
Switzerland	Australia	3.05014e+06
Switzerland	Australia	64953.9
Switzerland	Austria	115184
Switzerland	Austria	25703.5
Switzerland	Bahrain	126843
Switzerland	Belgium	3.3375e+06
Switzerland	Belgium	4847.44
Switzerland	Brazil	646.393
Switzerland	Canada	147289
Switzerland	China	1.48533e+06
Switzerland	China	201636
Switzerland	China, Hong Kong SAR	5.01665e+06
Switzerland	China, Hong Kong SAR	5.38646e+06
Switzerland	Colombia	1.7291e+06
Switzerland	Czechia	1.52569e+07
Switzerland	Czechia	49.723
Switzerland	Denmark	2728.65
Switzerland	France	4.68192e+07
Switzerland	France	1.09266e+06
Switzerland	French Polynesia	58706.1
Switzerland	Germany	8.93613e+07
Switzerland	Germany	665481
Switzerland	Hungary	432.282
Switzerland	Hungary	2329.86
Switzerland	Ireland	345.014
Switzerland	Italy	2.26362e+08
Switzerland	Italy	1.37852e+06
Switzerland	Japan	7.06557e+07
Switzerland	Japan	46781.8
Switzerland	Kenya	102.489
Switzerland	Lithuania	213.097
Switzerland	Luxembourg	76181.1
Switzerland	Malaysia	665.674
Switzerland	Netherlands	3.96416e+06
Switzerland	Netherlands	13234.3
Switzerland	Other Asia, nes	4.42591e+06
Switzerland	Other Asia, nes	563.184
Switzerland	Poland	142.064
Switzerland	Portugal	54.796
Switzerland	Russian Federation	4.01786e+07
Switzerland	Russian Federation	99.445
Switzerland	Saudi Arabia	4.08045e+06
Switzerland	Serbia	478496
Switzerland	Singapore	36584.6
Switzerland	Singapore	40101.8
Switzerland	South Africa	1.19974e+08
Switzerland	Spain	2.61652e+06
Switzerland	Spain	463111
Switzerland	Sweden	85801.9
Switzerland	Sweden	119888
Switzerland	Thailand	25724.8
Switzerland	Türkiye	5.8964e+06
Switzerland	Ukraine	678635
Switzerland	United Arab Emirates	7.57006e+06
Switzerland	United Arab Emirates	114175
Switzerland	United Kingdom	8.13322e+07
Switzerland	United Kingdom	2.4733e+06
Switzerland	USA	1.94902e+08
Switzerland	USA	4.21147e+06
Switzerland	Viet Nam	80.165
Thailand	Australia	1768.09
Thailand	Australia	89126.2
Thailand	Brazil	2647.02
Thailand	China	183076
Thailand	China	194253
Thailand	China, Hong Kong SAR	595524
Thailand	China, Hong Kong SAR	7965.07
Thailand	Czechia	45646.9
Thailand	Denmark	485
Thailand	France	138171
Thailand	France	14566
Thailand	Germany	5.5458e+06
Thailand	India	96.5
Thailand	Italy	581654
Thailand	Italy	27.36
Thailand	Japan	2.61613e+07
Thailand	Japan	186661
Thailand	Malaysia	2109.69
Thailand	New Zealand	363061
Thailand	Norway	69.93
Thailand	Philippines	694.14
Thailand	Rep. of Korea	225.88
Thailand	Russian Federation	8489.49
Thailand	Singapore	17.25
Thailand	Singapore	360.91
Thailand	Spain	29444.5
Thailand	Switzerland	1.18601e+06
Thailand	Thailand	28085.6
Thailand	Thailand	82153.7
Thailand	United Arab Emirates	191.42
Thailand	United Kingdom	175992
Thailand	USA	5.00459e+06
Thailand	USA	5729.03
Togo	Morocco	1483
Trinidad and Tobago	Canada	1404.87
Trinidad and Tobago	China	9889.31
Trinidad and Tobago	USA	8531.08
Tunisia	France	2145
Tunisia	France	1207
Tunisia	Germany	9148
Türkiye	Austria	594669
Türkiye	Belgium	316
Türkiye	Canada	207
Türkiye	China	1786
Türkiye	China	50999
Türkiye	China, Hong Kong SAR	562
Türkiye	China, Hong Kong SAR	2418
Türkiye	France	2723
Türkiye	Germany	1109724
Türkiye	Germany	135
Türkiye	India	233
Türkiye	Italy	311122
Türkiye	Italy	3879
Türkiye	Japan	34030
Türkiye	Japan	61652
Türkiye	Switzerland	157839
Türkiye	United Arab Emirates	74469
Türkiye	United Kingdom	624673
Türkiye	USA	807954
Uganda	China	588
Uganda	Kenya	49
Uganda	Kenya	2647
Uganda	United Arab Emirates	11
Uganda	United Kingdom	16587
Ukraine	Belgium	339547
Ukraine	China	1576.85
Ukraine	Czechia	89577.8
Ukraine	France	11726.9
Ukraine	Germany	361318
Ukraine	Italy	3491.99
Ukraine	Italy	1279.25
Ukraine	Japan	5496.79
Ukraine	Other Asia, nes	27.99
Ukraine	Russian Federation	329728
Ukraine	Sweden	335.49
Ukraine	Switzerland	2015.85
Ukraine	USA	1131.72
United Arab Emirates	Australia	18644
United Arab Emirates	Austria	144687
United Arab Emirates	Bangladesh	1257.18
United Arab Emirates	Belgium	9310.94
United Arab Emirates	Cambodia	937.508
United Arab Emirates	Canada	40314.5
United Arab Emirates	Canada	377.399
United Arab Emirates	China	224735
United Arab Emirates	China, Hong Kong SAR	1.13339e+06
United Arab Emirates	China, Hong Kong SAR	9536.01
United Arab Emirates	Congo	5776.17
United Arab Emirates	Denmark	29.027
United Arab Emirates	Egypt	19.619
United Arab Emirates	France	256776
United Arab Emirates	Germany	10078.9
United Arab Emirates	Germany	344928
United Arab Emirates	India	3965.42
United Arab Emirates	India	3.24212e+06
United Arab Emirates	Indonesia	563.376
United Arab Emirates	Italy	182911
United Arab Emirates	Italy	2.11117e+06
United Arab Emirates	Japan	1.04665e+07
United Arab Emirates	Japan	616.746
United Arab Emirates	Lebanon	3606.26
United Arab Emirates	Luxembourg	1603.54
United Arab Emirates	Malaysia	101844
United Arab Emirates	Myanmar	213.478
United Arab Emirates	Oman	5107.15
United Arab Emirates	Pakistan	155589
United Arab Emirates	Pakistan	826.957
United Arab Emirates	Rep. of Korea	15248.5
United Arab Emirates	Saudi Arabia	6042.75
United Arab Emirates	Saudi Arabia	811.164
United Arab Emirates	South Africa	2.74449e+06
United Arab Emirates	Spain	320860
United Arab Emirates	Switzerland	3.19771e+06
United Arab Emirates	Thailand	2206.98
United Arab Emirates	Türkiye	339.823
United Arab Emirates	United Kingdom	2.48509e+07
United Arab Emirates	United Kingdom	6658.13
United Arab Emirates	USA	553159
United Arab Emirates	USA	1750.28
United Arab Emirates	Viet Nam	367.052
United Arab Emirates	Yemen	87.406
United Arab Emirates	Zimbabwe	278794
United Kingdom	Australia	222570
United Kingdom	Australia	65165
United Kingdom	Austria	313248
United Kingdom	Austria	2060
United Kingdom	Belgium	62948671
United Kingdom	Brazil	9236
United Kingdom	Canada	21976580
United Kingdom	Canada	26912
United Kingdom	China	192399
United Kingdom	China	1589416
United Kingdom	China, Hong Kong SAR	7269810
United Kingdom	China, Hong Kong SAR	160671
United Kingdom	Dem. People's Rep. of Korea	335999
United Kingdom	Denmark	800
United Kingdom	Denmark	1312
United Kingdom	France	656402
United Kingdom	France	434074
United Kingdom	French Polynesia	5334
United Kingdom	Georgia	22345000
United Kingdom	Germany	151412119
United Kingdom	Germany	152285
United Kingdom	Hungary	2791
United Kingdom	India	44122
United Kingdom	Indonesia	174952
United Kingdom	Ireland	17076447
United Kingdom	Ireland	3968
United Kingdom	Israel	1408
United Kingdom	Israel	5205
United Kingdom	Italy	55102298
United Kingdom	Italy	134256
United Kingdom	Japan	84064526
United Kingdom	Japan	684962
United Kingdom	Luxembourg	1111146
United Kingdom	Mexico	2797805
United Kingdom	Netherlands	9956
United Kingdom	Netherlands	1926
United Kingdom	North Macedonia	32672
United Kingdom	Norway	93956153
United Kingdom	Other Asia, nes	4000600
United Kingdom	Poland	5640
United Kingdom	Portugal	26
United Kingdom	Rep. of Korea	3791947
United Kingdom	Rep. of Korea	6083
United Kingdom	Romania	805
United Kingdom	Russian Federation	380160028
United Kingdom	Saudi Arabia	6474679
United Kingdom	Serbia	545317
United Kingdom	Singapore	139442
United Kingdom	South Africa	1233280270
United Kingdom	South Africa	5999
United Kingdom	Spain	4110619
United Kingdom	Spain	1285
United Kingdom	Sweden	16890
United Kingdom	Switzerland	32407047
United Kingdom	Switzerland	892123
United Kingdom	Thailand	57395
United Kingdom	Thailand	30778
United Kingdom	Türkiye	118390
United Kingdom	Türkiye	24563
United Kingdom	Ukraine	163292
United Kingdom	United Arab Emirates	80560
United Kingdom	United Kingdom	437736
United Kingdom	United Kingdom	15550
United Kingdom	USA	87618039
United Kingdom	USA	540915
United Kingdom	Viet Nam	5333
United Rep. of Tanzania	China	2440
United Rep. of Tanzania	Denmark	15
United Rep. of Tanzania	Thailand	229
Uruguay	Brazil	3007
Uruguay	China	9643
Uruguay	China, Hong Kong SAR	2513
Uruguay	Czechia	3106
Uruguay	Germany	144
Uruguay	Spain	265
Uruguay	USA	135576
USA	Argentina	467880
USA	Australia	50351
USA	Australia	316828
USA	Austria	6690837
USA	Austria	33949
USA	Belgium	53777471
USA	Bermuda	2316
USA	Brazil	3705672
USA	Cambodia	16688
USA	Canada	102257424
USA	Canada	941118
USA	China	21326570
USA	China	18611749
USA	China, Hong Kong SAR	51380
USA	China, Hong Kong SAR	377021
USA	Colombia	27859892
USA	Costa Rica	200724
USA	Czechia	7764734
USA	Denmark	9905
USA	Dominican Rep.	22768
USA	Ecuador	11711
USA	Ethiopia	47232
USA	Fiji	42203
USA	France	5591985
USA	France	90378
USA	French Polynesia	280684
USA	Germany	303125358
USA	Germany	65537
USA	India	377399
USA	India	122692
USA	Indonesia	47797
USA	Ireland	14119
USA	Ireland	3164
USA	Israel	11467
USA	Italy	206322899
USA	Italy	567978
USA	Japan	23029434
USA	Japan	1192319
USA	Lao People's Dem. Rep.	56537
USA	Mexico	1526706
USA	Mexico	18411
USA	Nepal	11808
USA	Netherlands	34160
USA	New Zealand	2085
USA	Nicaragua	3229
USA	Norway	84111566
USA	Other Asia, nes	4451149
USA	Other Asia, nes	11052
USA	Peru	5555
USA	Philippines	36117
USA	Portugal	7630
USA	Rep. of Korea	63101914
USA	Russian Federation	615817052
USA	Singapore	13525001
USA	Singapore	3560
USA	South Africa	1299363225
USA	Sweden	2987
USA	Switzerland	102392504
USA	Switzerland	38048
USA	Thailand	396129
USA	Türkiye	41380
USA	Türkiye	9848
USA	United Kingdom	313817034
USA	United Kingdom	299503
USA	Venezuela	20207
USA	Viet Nam	41372
USA	Viet Nam	177924
Viet Nam	Areas, nes	71673.2
Viet Nam	Areas, nes	3763
Viet Nam	Australia	25900
Viet Nam	China	35866.5
Viet Nam	China	340900
Viet Nam	China, Hong Kong SAR	83579.3
Viet Nam	France	52317.8
Viet Nam	France	13795.6
Viet Nam	Germany	1686.18
Viet Nam	India	65291.1
Viet Nam	India	6057.72
Viet Nam	Indonesia	105417
Viet Nam	Italy	180054
Viet Nam	Italy	378.75
Viet Nam	Japan	1.04834e+07
Viet Nam	Japan	148439
Viet Nam	Myanmar	25142
Viet Nam	Rep. of Korea	74048.6
Viet Nam	Switzerland	128443
Viet Nam	USA	1.086e+06
Zambia	South Africa	1052.31
Zambia	United Kingdom	557.369
Zimbabwe	South Africa	8660.61
Zimbabwe	South Africa	240.7

## Sheet: 2017
source	target	weight
Algeria	Austria	41227.1
Algeria	China	51559.5
Algeria	Türkiye	1358.22
Algeria	Türkiye	10.96
Andorra	Colombia	25453.6
Andorra	France	11376.7
Andorra	Germany	1329.22
Andorra	Spain	11570
Andorra	Spain	70859.4
Angola	China	438.95
Angola	China	764.12
Angola	Malaysia	3909
Angola	Portugal	381.2
Angola	South Africa	27805
Antigua and Barbuda	China	28011.2
Antigua and Barbuda	Italy	152.474
Antigua and Barbuda	Other Asia, nes	15.185
Antigua and Barbuda	Spain	300.081
Argentina	Austria	25050
Argentina	Belgium	4.64152e+06
Argentina	Canada	57.41
Argentina	China	1126.1
Argentina	Czechia	67655.1
Argentina	Germany	374576
Argentina	Italy	543868
Argentina	South Africa	4.30333e+06
Argentina	Switzerland	281.18
Argentina	United Kingdom	5.67374e+07
Argentina	USA	3.07838e+06
Armenia	China	11922.2
Armenia	China, Hong Kong SAR	2401.44
Armenia	Germany	6453.02
Armenia	Italy	1360.65
Armenia	USA	146.15
Aruba	Areas, nes	1125.7
Aruba	Areas, nes	57684.9
Aruba	Netherlands	587.709
Aruba	Panama	746.927
Aruba	Spain	221.788
Aruba	Switzerland	7800
Aruba	USA	26633.5
Aruba	USA	60932.4
Australia	Australia	1029.28
Australia	Australia	176531
Australia	Austria	226451
Australia	Belgium	4973.48
Australia	Canada	1007.53
Australia	China	48600.4
Australia	China	1.18262e+06
Australia	China, Hong Kong SAR	644898
Australia	China, Hong Kong SAR	161380
Australia	France	298828
Australia	French Polynesia	4719.04
Australia	Germany	3.78414e+06
Australia	Germany	64232.7
Australia	India	1854.35
Australia	Italy	365627
Australia	Italy	38583.2
Australia	Japan	232760
Australia	Japan	60412.1
Australia	New Zealand	1.23769e+06
Australia	New Zealand	2251.7
Australia	Philippines	7516.59
Australia	Portugal	873.976
Australia	South Africa	1.61151e+06
Australia	Spain	9085.63
Australia	Spain	20512
Australia	Switzerland	4.57458e+06
Australia	Thailand	52907.7
Australia	Thailand	50320
Australia	United Arab Emirates	2054.94
Australia	United Kingdom	1.7487e+07
Australia	United Kingdom	6534.9
Australia	USA	6.85251e+06
Australia	USA	422778
Australia	Viet Nam	4248.57
Austria	Australia	1261.42
Austria	Belgium	463971
Austria	Belgium	48.56
Austria	Bulgaria	1878.02
Austria	Canada	19390
Austria	China	515448
Austria	China, Hong Kong SAR	1.66746e+06
Austria	Cook Isds	322.978
Austria	Croatia	2631.26
Austria	Czechia	62119.1
Austria	Czechia	25434
Austria	Denmark	654.991
Austria	France	66456.8
Austria	France	20092.4
Austria	Germany	5.19177e+07
Austria	Germany	850558
Austria	Greece	56137.3
Austria	Greece	677.577
Austria	Hungary	144599
Austria	Hungary	338.789
Austria	Iceland	42.913
Austria	India	425.744
Austria	Israel	32.75
Austria	Italy	362049
Austria	Italy	84093
Austria	Japan	1.35136e+07
Austria	Japan	866.169
Austria	Malaysia	214353
Austria	Netherlands	392872
Austria	Philippines	469.787
Austria	Poland	478014
Austria	Singapore	269.902
Austria	Singapore	214.566
Austria	Slovakia	43684.5
Austria	Slovenia	41139.1
Austria	South Africa	215.695
Austria	Sweden	1.01824e+06
Austria	Switzerland	5.06976e+06
Austria	Switzerland	1008.46
Austria	Thailand	417435
Austria	Thailand	8523.92
Austria	Türkiye	176.17
Austria	United Kingdom	1.09022e+07
Austria	United Kingdom	12072.2
Austria	USA	64095.4
Austria	USA	11547
Azerbaijan	China	781.81
Azerbaijan	India	191
Bahamas	USA	876
Bahamas	USA	256771
Bahrain	China	22871.2
Bahrain	China, Hong Kong SAR	349.973
Bahrain	France	3375.15
Bahrain	India	1208.78
Bahrain	Italy	2676.67
Bahrain	Thailand	77.526
Bahrain	Thailand	1208.78
Bahrain	United Kingdom	14933.8
Bahrain	United Kingdom	838.11
Bahrain	USA	1386.81
Barbados	China	223268
Barbados	China, Hong Kong SAR	184
Barbados	India	7622.5
Barbados	Italy	4183
Barbados	Other Asia, nes	157.5
Barbados	Thailand	6511.5
Barbados	USA	5385.5
Barbados	USA	49404.5
Belgium	Australia	154.9
Belgium	Austria	121911
Belgium	Canada	38418.9
Belgium	China	11799.3
Belgium	China	9376.9
Belgium	China, Hong Kong SAR	12987.4
Belgium	Curaçao	10203.6
Belgium	Czechia	225752
Belgium	Denmark	839.352
Belgium	Denmark	517.655
Belgium	France	49516.3
Belgium	France	87208.7
Belgium	Germany	1.88951e+07
Belgium	Germany	17029.8
Belgium	Ireland	233.067
Belgium	Italy	424063
Belgium	Italy	1547.44
Belgium	Japan	286.755
Belgium	Kenya	4422.99
Belgium	Luxembourg	2277.17
Belgium	Netherlands	592791
Belgium	Netherlands	11632.8
Belgium	Poland	179506
Belgium	Poland	1.027
Belgium	Portugal	14083.4
Belgium	Romania	1306.12
Belgium	South Africa	1.94702e+06
Belgium	Spain	1117.6
Belgium	Switzerland	937543
Belgium	Thailand	51867.6
Belgium	Türkiye	1399.46
Belgium	United Arab Emirates	213086
Belgium	United Kingdom	4.89002e+06
Belgium	USA	83061.3
Belgium	USA	7755.55
Bermuda	USA	118901
Bermuda	USA	2150
Bolivia (Plurinational State of)	Canada	1096.26
Bolivia (Plurinational State of)	China	3567.82
Bolivia (Plurinational State of)	Portugal	59.05
Bolivia (Plurinational State of)	Rep. of Korea	165.81
Bolivia (Plurinational State of)	Spain	1269.82
Bolivia (Plurinational State of)	USA	56134.1
Bosnia Herzegovina	Austria	4169.86
Bosnia Herzegovina	China	14233.3
Bosnia Herzegovina	Germany	370.21
Bosnia Herzegovina	Germany	882.41
Bosnia Herzegovina	Slovenia	1421.74
Bosnia Herzegovina	USA	191.76
Botswana	Canada	19116.6
Botswana	Kenya	41.969
Botswana	South Africa	197.027
Botswana	South Africa	836.288
Brazil	Belgium	36582192
Brazil	Brazil	241
Brazil	China	7669
Brazil	China, Hong Kong SAR	10121
Brazil	Czechia	11786
Brazil	France	18962
Brazil	France	3864
Brazil	Germany	8449524
Brazil	India	97
Brazil	India	181
Brazil	Italy	882194
Brazil	Japan	8219
Brazil	Peru	320816
Brazil	Russian Federation	67051835
Brazil	South Africa	80725544
Brazil	Sweden	2387
Brazil	Switzerland	1159
Brazil	Thailand	245
Brazil	United Kingdom	19294560
Brazil	USA	16930538
Brazil	USA	6386
Brunei Darussalam	China, Hong Kong SAR	793.888
Brunei Darussalam	Germany	1854.58
Bulgaria	Austria	22206.5
Bulgaria	Belgium	2365.91
Bulgaria	Canada	7321.58
Bulgaria	China	52718
Bulgaria	China, Hong Kong SAR	52051.6
Bulgaria	Germany	22967.8
Bulgaria	Germany	536.233
Bulgaria	Italy	384.676
Bulgaria	Japan	3457.46
Bulgaria	North Macedonia	603.913
Bulgaria	Russian Federation	7970.61
Bulgaria	Spain	674.485
Bulgaria	Switzerland	240.64
Bulgaria	Thailand	1132.63
Bulgaria	Türkiye	38094.5
Bulgaria	United Kingdom	2.61159e+06
Bulgaria	USA	2209.14
Burundi	China	393.262
Burundi	Uganda	34400.6
Cabo Verde	Italy	282.828
Cameroon	China	1162.57
Canada	Australia	15746.9
Canada	Australia	31797.3
Canada	Bangladesh	431.506
Canada	Belgium	1.11559e+07
Canada	Canada	355836
Canada	Canada	2149.82
Canada	China	12838.8
Canada	China	1.08391e+06
Canada	China, Hong Kong SAR	742.036
Canada	China, Hong Kong SAR	72499.1
Canada	Czechia	2248.45
Canada	Denmark	1437.07
Canada	France	9619.49
Canada	France	226477
Canada	French Polynesia	811.385
Canada	Germany	1.34902e+06
Canada	Germany	4259.58
Canada	India	1732.96
Canada	India	3594.6
Canada	Indonesia	13188.7
Canada	Israel	1179.71
Canada	Italy	3.42873e+06
Canada	Italy	24125.8
Canada	Japan	1.58466e+06
Canada	Japan	8400.49
Canada	Mexico	3240.92
Canada	Norway	1.48675e+06
Canada	Other Asia, nes	21244.7
Canada	Philippines	58.561
Canada	Poland	93578.9
Canada	Rep. of Korea	264.297
Canada	Rep. of Korea	859.929
Canada	Russian Federation	4.89335e+07
Canada	Senegal	74.743
Canada	South Africa	8.65513e+07
Canada	Spain	27485.4
Canada	Switzerland	3.33005e+07
Canada	Thailand	25627.6
Canada	Thailand	18245
Canada	Togo	27.74
Canada	Türkiye	64.726
Canada	United Arab Emirates	13.099
Canada	United Kingdom	3.67349e+07
Canada	United Kingdom	35725.6
Canada	USA	3.95489e+07
Canada	USA	1.5443e+06
Canada	Viet Nam	4554.7
Chile	Areas, nes	925.35
Chile	Austria	19496.3
Chile	China	627.449
Chile	Costa Rica	1101.82
Chile	Italy	3953.23
Chile	Lithuania	744.72
Chile	Mexico	174.07
Chile	Singapore	175.56
Chile	Spain	53546
Chile	Switzerland	577.44
Chile	United Arab Emirates	153.22
Chile	United Kingdom	2680.1
Chile	USA	5493.78
Chile	USA	5244.05
China	Areas, nes	12482732
China	Australia	686148
China	Australia	27347
China	Austria	638151
China	Austria	405
China	Belgium	48464588
China	Canada	684396
China	Canada	1007
China	China	529425
China	China	258113
China	China, Hong Kong SAR	109232060
China	China, Hong Kong SAR	81331
China	Denmark	247
China	France	54114
China	France	462473
China	French Polynesia	440
China	Germany	44794139
China	Germany	49681
China	Ireland	116995
China	Italy	9998270
China	Italy	204125
China	Japan	252931665
China	Japan	971539
China	Lithuania	35
China	Madagascar	4480
China	Mauritius	1763
China	Netherlands	4278
China	Other Asia, nes	15845096
China	Other Asia, nes	26641
China	Portugal	40578
China	Rep. of Korea	2299309
China	Rep. of Korea	5419
China	Russian Federation	255744077
China	Singapore	14954473
China	South Africa	1364964257
China	Spain	247
China	Switzerland	102234456
China	Switzerland	6018
China	Thailand	2651
China	United Kingdom	152198726
China	United Kingdom	1584
China	USA	35834841
China	USA	10936
China, Hong Kong SAR	Armenia	128725
China, Hong Kong SAR	Australia	284864
China, Hong Kong SAR	Australia	11830.2
China, Hong Kong SAR	Belgium	1.56141e+06
China, Hong Kong SAR	Canada	32383
China, Hong Kong SAR	China	1.12334e+07
China, Hong Kong SAR	China	9.3294e+06
China, Hong Kong SAR	China, Macao SAR	32767.1
China, Hong Kong SAR	France	15852.7
China, Hong Kong SAR	France	48606.7
China, Hong Kong SAR	Germany	1.78892e+08
China, Hong Kong SAR	Germany	511126
China, Hong Kong SAR	India	1.24172e+09
China, Hong Kong SAR	Ireland	1728.3
China, Hong Kong SAR	Israel	6299.86
China, Hong Kong SAR	Italy	5.03291e+06
China, Hong Kong SAR	Italy	172001
China, Hong Kong SAR	Japan	3.33629e+08
China, Hong Kong SAR	Japan	3.77314e+06
China, Hong Kong SAR	Malaysia	11101.2
China, Hong Kong SAR	Mexico	10246
China, Hong Kong SAR	Netherlands	20888.1
China, Hong Kong SAR	Norway	6250.2
China, Hong Kong SAR	Oceania, nes	671.997
China, Hong Kong SAR	Other Asia, nes	1.92931e+06
China, Hong Kong SAR	Other Asia, nes	1.69233e+06
China, Hong Kong SAR	Philippines	8722.62
China, Hong Kong SAR	Poland	4467.36
China, Hong Kong SAR	Rep. of Korea	286527
China, Hong Kong SAR	Rep. of Korea	34113.4
China, Hong Kong SAR	Russian Federation	4.65541e+08
China, Hong Kong SAR	Singapore	1.23787e+06
China, Hong Kong SAR	Singapore	929847
China, Hong Kong SAR	South Africa	5.31713e+08
China, Hong Kong SAR	Spain	1575.86
China, Hong Kong SAR	Sweden	26125.3
China, Hong Kong SAR	Switzerland	4.40339e+08
China, Hong Kong SAR	Switzerland	3.02914e+06
China, Hong Kong SAR	Thailand	114237
China, Hong Kong SAR	Thailand	14181.9
China, Hong Kong SAR	United Arab Emirates	29833.7
China, Hong Kong SAR	United Arab Emirates	5.76736e+08
China, Hong Kong SAR	United Kingdom	1.1938e+09
China, Hong Kong SAR	United Kingdom	448557
China, Hong Kong SAR	USA	3.87444e+07
China, Hong Kong SAR	USA	3.95231e+07
China, Macao SAR	China	3850.02
China, Macao SAR	China, Hong Kong SAR	45927.8
China, Macao SAR	Japan	8.60671e+06
Colombia	China	4524.36
Colombia	Germany	1449.72
Colombia	Italy	89921.8
Colombia	Spain	20828
Colombia	Switzerland	9090.14
Colombia	Thailand	97.63
Colombia	United Kingdom	38157.4
Colombia	USA	349769
Colombia	USA	227.43
Comoros	France	35.742
Congo	China	62.734
Congo	France	35.238
Costa Rica	Areas, nes	7368.04
Costa Rica	China	98625.7
Costa Rica	China	13.739
Costa Rica	France	976544
Costa Rica	Germany	52418.3
Costa Rica	Ireland	69636.6
Costa Rica	Mexico	248.087
Costa Rica	Panama	18116.8
Costa Rica	Spain	29399.6
Costa Rica	Sweden	20334.5
Costa Rica	Switzerland	265651
Costa Rica	Uruguay	8465.85
Costa Rica	USA	7.16423e+06
Costa Rica	USA	21712.3
Côte d'Ivoire	Areas, nes	23.291
Côte d'Ivoire	Belgium	110.876
Côte d'Ivoire	China	1352.92
Côte d'Ivoire	Ethiopia	635.934
Côte d'Ivoire	Kenya	761.141
Côte d'Ivoire	Mali	660.056
Côte d'Ivoire	Spain	230.751
Croatia	Austria	33802
Croatia	China	228
Croatia	Germany	37767
Croatia	Germany	193
Croatia	Italy	126
Croatia	Netherlands	218
Croatia	Poland	31
Croatia	Slovenia	32046
Croatia	Slovenia	18188
Croatia	Switzerland	198
Croatia	Türkiye	911
Cuba	China	1455.59
Cuba	Colombia	1668.42
Cuba	Panama	1560.65
Cuba	Spain	1554.57
Curaçao	China	335.198
Curaçao	Spain	837.994
Curaçao	USA	12123
Curaçao	USA	21285
Cyprus	China	232.714
Cyprus	Germany	6067.52
Cyprus	Italy	10558
Cyprus	Italy	91.504
Cyprus	USA	6020.07
Czechia	Areas, nes	7777
Czechia	Australia	457
Czechia	Australia	3739
Czechia	Austria	871868
Czechia	Belgium	1871
Czechia	China	68
Czechia	China	294884
Czechia	China, Hong Kong SAR	5935
Czechia	Cuba	12
Czechia	France	100504
Czechia	Germany	7195918
Czechia	Germany	28643
Czechia	Indonesia	1069
Czechia	Italy	181120
Czechia	Italy	14978
Czechia	Luxembourg	735930
Czechia	Netherlands	12135
Czechia	Norway	266
Czechia	Other Asia, nes	1243
Czechia	Russian Federation	89396193
Czechia	Slovakia	124824
Czechia	South Africa	1916114
Czechia	Spain	12925
Czechia	Spain	385
Czechia	Switzerland	1001425
Czechia	Switzerland	21086
Czechia	Thailand	236
Czechia	Thailand	1007
Czechia	United Kingdom	8750747
Czechia	United Kingdom	4082
Czechia	USA	384411
Czechia	USA	3575
Dem. Rep. of the Congo	United Rep. of Tanzania	511.379
Denmark	Australia	3836.89
Denmark	Austria	11099.1
Denmark	Belgium	26250.9
Denmark	Bulgaria	6442.06
Denmark	Canada	4935.12
Denmark	China	40714.2
Denmark	China, Hong Kong SAR	23161.7
Denmark	Croatia	229.336
Denmark	Czechia	8308.18
Denmark	Estonia	3172.43
Denmark	Finland	850.061
Denmark	France	1102.79
Denmark	France	63337.8
Denmark	French Polynesia	260995
Denmark	Germany	2.91249e+06
Denmark	Germany	284838
Denmark	Greece	2177.47
Denmark	Greece	18202.4
Denmark	Hungary	1461.22
Denmark	India	88.089
Denmark	India	2415.47
Denmark	Indonesia	855.984
Denmark	Ireland	908937
Denmark	Italy	11068.6
Denmark	Japan	69837.3
Denmark	Latvia	24782.4
Denmark	Lithuania	23924.4
Denmark	Luxembourg	3563.82
Denmark	Malta	2078.91
Denmark	Mexico	175.115
Denmark	Netherlands	522.005
Denmark	Netherlands	175.723
Denmark	New Zealand	844.745
Denmark	Poland	2307.33
Denmark	Poland	17.01
Denmark	Portugal	14522.7
Denmark	Portugal	72.901
Denmark	Singapore	1556.6
Denmark	Slovakia	1039.61
Denmark	Slovenia	5484.62
Denmark	South Africa	522.005
Denmark	Spain	18549.5
Denmark	Sweden	22.326
Denmark	Sweden	8646.41
Denmark	Switzerland	728720
Denmark	Thailand	298.288
Denmark	Thailand	5119.96
Denmark	United Kingdom	925821
Denmark	United Kingdom	46800.3
Denmark	USA	406966
Dominica	Antigua and Barbuda	29.63
Dominica	USA	429.261
Dominican Rep.	China	537.593
Dominican Rep.	Dominican Rep.	6998.27
Dominican Rep.	Spain	1882.62
Dominican Rep.	USA	3.98029e+07
Dominican Rep.	USA	586.767
Ecuador	China	5.69
Ecuador	China	3607
Ecuador	Spain	10739.1
Ecuador	USA	657.93
Ecuador	USA	2037.51
Egypt	France	235.346
El Salvador	China	964.35
El Salvador	Rep. of Korea	72.37
El Salvador	Spain	3555.8
El Salvador	Thailand	74.44
El Salvador	USA	447.78
Estonia	China	120480
Estonia	Finland	72.583
Estonia	Germany	1.4343e+06
Estonia	Germany	17600.1
Estonia	Sweden	628.977
Estonia	USA	86.919
Eswatini	South Africa	52.752
Eswatini	South Africa	535.499
Eswatini	United Rep. of Tanzania	43.572
Ethiopia	China	5.77
Ethiopia	China	103138
Ethiopia	India	944.333
Fiji	China, Hong Kong SAR	32707.4
Finland	Australia	88.118
Finland	Austria	92.637
Finland	Belgium	105.064
Finland	Belgium	14.686
Finland	Bulgaria	1547.71
Finland	China	2283.16
Finland	China	162402
Finland	Denmark	183.014
Finland	Estonia	774.986
Finland	France	55264.6
Finland	France	4944.77
Finland	Germany	641579
Finland	Germany	1087.92
Finland	Italy	2270.73
Finland	Japan	41.8
Finland	Norway	1032.56
Finland	Sweden	490443
Finland	Sweden	7889.94
Finland	Switzerland	611701
Finland	Thailand	51.967
Finland	United Kingdom	966274
Finland	USA	48876.1
Finland	USA	855.196
France	Andorra	47941.9
France	Areas, nes	162277
France	Areas, nes	9024.24
France	Australia	3604.05
France	Austria	318074
France	Austria	1382.7
France	Belgium	1.88964e+06
France	Belgium	967.327
France	Bolivia (Plurinational State of)	305.887
France	Brazil	160.281
France	Canada	14877.9
France	China	4371.59
France	China	340469
France	China, Hong Kong SAR	302658
France	Colombia	13567.4
France	Côte d'Ivoire	196.4
France	Czechia	248317
France	Denmark	85483.7
France	France	2.65091e+06
France	France	13619.3
France	French Polynesia	87648.6
France	Germany	3.18111e+07
France	Germany	12941
France	Hungary	12820.2
France	India	243206
France	India	818.334
France	Ireland	1540.72
France	Italy	3.63422e+07
France	Italy	178953
France	Japan	2.34432e+06
France	Japan	11655.3
France	Luxembourg	4358.05
France	Netherlands	22693.2
France	New Caledonia	321.69
France	New Zealand	21854.6
France	Philippines	97661.6
France	Poland	2889.56
France	Portugal	3905.43
France	Singapore	323.947
France	Spain	5.10759e+06
France	Spain	363.453
France	Switzerland	2.28531e+07
France	Switzerland	53391.5
France	Thailand	55886
France	Thailand	5009.33
France	Türkiye	60.952
France	Uganda	545.179
France	United Kingdom	5.70215e+06
France	United Kingdom	345.393
France	USA	2.45801e+07
France	USA	87236.6
French Polynesia	France	2550.7
French Polynesia	Germany	54.197
Gabon	Lebanon	116.922
Gambia	United Kingdom	193.736
Georgia	Poland	427.68
Germany	Argentina	639917
Germany	Australia	54742.1
Germany	Australia	13564.1
Germany	Austria	6.08633e+07
Germany	Austria	39494.1
Germany	Bahamas	20626.3
Germany	Bahamas	883.193
Germany	Belgium	2.63423e+08
Germany	Belgium	12464.1
Germany	Brazil	2.41242e+06
Germany	Bulgaria	28761.4
Germany	Canada	14632.5
Germany	Canada	1200.56
Germany	China	2.14318e+06
Germany	China	4.31579e+06
Germany	China, Hong Kong SAR	987861
Germany	Croatia	8992.3
Germany	Cyprus	425723
Germany	Czechia	1.86896e+07
Germany	Czechia	58.729
Germany	Denmark	167189
Germany	Denmark	12213.4
Germany	Estonia	6.62432e+06
Germany	Finland	454083
Germany	Finland	48.564
Germany	France	6.35318e+07
Germany	France	152998
Germany	French Polynesia	11093
Germany	Ghana	2364.97
Germany	Hungary	25036.6
Germany	India	160590
Germany	India	50374.7
Germany	Indonesia	23894.8
Germany	Indonesia	263.151
Germany	Iran	489596
Germany	Ireland	1.18984e+06
Germany	Israel	1.22717e+06
Germany	Italy	5.42323e+07
Germany	Italy	86957.2
Germany	Japan	2.25726e+07
Germany	Japan	159591
Germany	Latvia	77623.8
Germany	Lithuania	2.1347e+07
Germany	Luxembourg	1.77717e+06
Germany	Malaysia	288871
Germany	Mexico	1.27862e+07
Germany	Netherlands	1.12215e+07
Germany	Netherlands	19097.1
Germany	New Zealand	5226.87
Germany	Norway	4.95724e+06
Germany	Norway	973.545
Germany	Other Asia, nes	500778
Germany	Philippines	2301.72
Germany	Poland	7.98663e+06
Germany	Poland	1655.7
Germany	Portugal	164132
Germany	Rep. of Korea	1.69312e+06
Germany	Rep. of Korea	2206.85
Germany	Romania	1.34527e+06
Germany	Russian Federation	2.5703e+08
Germany	Russian Federation	10693.2
Germany	Singapore	5.06225e+06
Germany	Slovakia	806567
Germany	South Africa	1.0428e+09
Germany	Spain	776367
Germany	Spain	1521.31
Germany	Sweden	111936
Germany	Sweden	64.376
Germany	Switzerland	2.57369e+08
Germany	Switzerland	53926.7
Germany	Thailand	63222.8
Germany	Thailand	22405.1
Germany	Türkiye	63821.4
Germany	Türkiye	4500.67
Germany	United Kingdom	1.01719e+09
Germany	United Kingdom	16604.5
Germany	Uruguay	7274.48
Germany	USA	7.04713e+08
Germany	USA	55589.2
Ghana	China	669.726
Ghana	Kenya	233.043
Ghana	Spain	215.629
Ghana	USA	13.686
Greece	Austria	74680.8
Greece	China	21443.5
Greece	China, Hong Kong SAR	4438.7
Greece	France	4.518
Greece	France	11189.4
Greece	Germany	14279.5
Greece	Germany	361.421
Greece	Hungary	993.907
Greece	Italy	4254.6
Greece	Italy	1305.63
Greece	Poland	1829.69
Greece	Spain	5289.17
Greece	Switzerland	38074.6
Greece	United Kingdom	1.43252e+06
Greece	United Kingdom	437.093
Greece	USA	3413.17
Guatemala	China	500
Guatemala	El Salvador	549
Guatemala	Germany	4287
Guatemala	India	684
Guatemala	Panama	338
Guatemala	Spain	876
Guatemala	USA	37195
Guatemala	USA	12098
Guyana	USA	115.3
Honduras	China	4315.49
Honduras	Costa Rica	4.54
Honduras	Italy	101.95
Honduras	Spain	351.9
Honduras	USA	2760.44
Honduras	USA	127.62
Hungary	Belgium	38
Hungary	Bulgaria	129
Hungary	Canada	423
Hungary	China	1803
Hungary	China, Hong Kong SAR	1297
Hungary	China, Hong Kong SAR	8977
Hungary	France	351
Hungary	Germany	289435
Hungary	Germany	8271
Hungary	Italy	33043
Hungary	Poland	6
Hungary	Serbia	49606
Hungary	Switzerland	33351
Hungary	Switzerland	4666
Hungary	United Kingdom	353592
Hungary	USA	4671
Hungary	USA	171
Iceland	Belgium	2678.49
Iceland	China	684.883
Iceland	Czechia	515.004
Iceland	Denmark	1051.68
Iceland	Germany	103300
Iceland	India	284.541
Iceland	Italy	10792
Iceland	Türkiye	881.579
Iceland	USA	29769.2
India	Areas, nes	3.52212e+06
India	Australia	848.633
India	Austria	63.149
India	Belgium	1.08699e+07
India	Canada	3815.63
India	China	27773.2
India	China	7229.71
India	China, Hong Kong SAR	439498
India	China, Hong Kong SAR	2911.22
India	Czechia	526328
India	France	32145.7
India	Germany	3.85099e+07
India	Germany	37.945
India	Italy	9.09429e+06
India	Japan	4.40239e+06
India	Norway	940772
India	Other Asia, nes	976.099
India	Rep. of Korea	1597.65
India	Russian Federation	3.02828e+07
India	Singapore	1.06612e+07
India	South Africa	1.10451e+08
India	Spain	497226
India	Sweden	308.277
India	Switzerland	1.24266e+07
India	Thailand	26574.5
India	United Arab Emirates	121426
India	United Kingdom	6.70977e+07
India	USA	1.69714e+07
India	USA	398.997
Indonesia	Australia	1767
Indonesia	China	3338
Indonesia	China	586
Indonesia	China, Hong Kong SAR	178200
Indonesia	China, Hong Kong SAR	1272
Indonesia	Germany	4570
Indonesia	Italy	71347
Indonesia	Japan	34762
Indonesia	Malaysia	187
Indonesia	Netherlands	980
Indonesia	Other Asia, nes	1920
Indonesia	Peru	786
Indonesia	Rep. of Korea	200740
Indonesia	Singapore	22231
Indonesia	Spain	141
Indonesia	Switzerland	937
Indonesia	Thailand	233490
Indonesia	United Kingdom	1239
Indonesia	USA	2644952
Indonesia	USA	278
Iran	China	3900
Iran	Czechia	4364
Iran	Other Asia, nes	363626
Iran	United Arab Emirates	57234
Ireland	Areas, nes	403786
Ireland	Areas, nes	40.669
Ireland	Australia	2331.66
Ireland	China	48806.7
Ireland	China, Hong Kong SAR	29.372
Ireland	China, Hong Kong SAR	2776.76
Ireland	Costa Rica	1145.5
Ireland	Germany	1.85859e+08
Ireland	Germany	462.04
Ireland	Iceland	132830
Ireland	Italy	1.92649e+06
Ireland	Malaysia	14898.2
Ireland	Netherlands	3.44777e+06
Ireland	Sri Lanka	733.163
Ireland	Switzerland	106709
Ireland	United Arab Emirates	127.654
Ireland	United Kingdom	1.09549e+06
Ireland	United Kingdom	181626
Ireland	USA	1.67361e+07
Ireland	USA	7367.78
Israel	Belgium	43000
Israel	China	58000
Israel	China, Hong Kong SAR	100000
Israel	Czechia	44000
Israel	Germany	302000
Israel	India	7000
Israel	Italy	10000
Israel	Italy	2000
Israel	Japan	1000
Israel	Rep. of Korea	170000
Israel	Switzerland	127000
Israel	Thailand	3000
Israel	Türkiye	20000
Israel	United Kingdom	1767000
Israel	USA	3229000
Israel	USA	2000
Italy	Austria	776067
Italy	Austria	121.948
Italy	Belgium	4.62376e+06
Italy	Canada	4171.08
Italy	China	1269.17
Italy	China	1.30272e+06
Italy	China, Hong Kong SAR	34301.3
Italy	Croatia	1.56709e+07
Italy	Czechia	5.18875e+06
Italy	Denmark	389.557
Italy	Egypt	209416
Italy	France	2.20493e+07
Italy	France	412784
Italy	French Polynesia	1.18937e+06
Italy	Germany	3.35652e+08
Italy	Germany	66880.7
Italy	Greece	30487.1
Italy	Greece	278.9
Italy	Hungary	288911
Italy	Hungary	254.059
Italy	India	3.18567e+06
Italy	Ireland	1.06746e+06
Italy	Israel	174068
Italy	Japan	1.44527e+06
Italy	Japan	75584.2
Italy	Lithuania	420270
Italy	Mexico	21531.8
Italy	Mexico	23319.2
Italy	Netherlands	1.07875e+06
Italy	Netherlands	2095.7
Italy	Other Asia, nes	13373.7
Italy	Poland	343032
Italy	Poland	28474.9
Italy	Portugal	55732.6
Italy	Portugal	501.343
Italy	Qatar	1326.75
Italy	Romania	74680.9
Italy	Russian Federation	5.60999e+08
Italy	Slovakia	10488.7
Italy	South Africa	1.57027e+08
Italy	Spain	9.83489e+06
Italy	Spain	87615.3
Italy	Sweden	6616.82
Italy	Switzerland	1.54164e+08
Italy	Thailand	2501.07
Italy	Türkiye	36451.3
Italy	United Kingdom	3.87959e+07
Italy	United Kingdom	1003.82
Italy	USA	1.06016e+08
Italy	USA	217866
Jamaica	USA	9818.78
Jamaica	USA	12454.6
Japan	Australia	6.75441e+06
Japan	Austria	2014.54
Japan	Belgium	4.97792e+06
Japan	China	3.60291e+07
Japan	China	2.968e+06
Japan	China, Hong Kong SAR	63867.9
Japan	Denmark	9377.39
Japan	Fiji	20956.5
Japan	France	22356
Japan	France	507137
Japan	French Polynesia	4234.09
Japan	Germany	7.73765e+07
Japan	Germany	2121.5
Japan	India	1.35488e+06
Japan	India	8503.83
Japan	Indonesia	36858.9
Japan	Israel	7942.26
Japan	Italy	4.99832e+06
Japan	Italy	180292
Japan	Malaysia	237287
Japan	Norway	4.43738e+07
Japan	Other Asia, nes	5.91726e+07
Japan	Other Asia, nes	22766
Japan	Philippines	2.98193e+06
Japan	Philippines	23960.5
Japan	Portugal	1987.79
Japan	Rep. of Korea	1.52439e+07
Japan	Rep. of Korea	22792.8
Japan	Russian Federation	7.41568e+08
Japan	Singapore	37010.4
Japan	South Africa	2.21682e+09
Japan	Spain	12978.6
Japan	Switzerland	7.78296e+07
Japan	Switzerland	19967.1
Japan	Thailand	83291.2
Japan	Thailand	233748
Japan	United Kingdom	8.52076e+07
Japan	United Kingdom	52752.3
Japan	USA	2.53767e+07
Japan	USA	148380
Japan	Viet Nam	22213.4
Japan	Viet Nam	203370
Jordan	France	614.085
Jordan	Italy	52025.4
Jordan	USA	998.592
Kazakhstan	China	4190.89
Kazakhstan	Germany	10914.7
Kazakhstan	Japan	200
Kazakhstan	Philippines	11220
Kazakhstan	Russian Federation	33178.7
Kazakhstan	USA	1518.03
Kenya	Belgium	1253.43
Kenya	Belgium	324.965
Kenya	India	380.859
Kenya	South Africa	2811.45
Kenya	South Africa	1469.66
Kuwait	China	10952.7
Kuwait	Denmark	359.374
Kuwait	France	4170.72
Kuwait	Germany	37351.8
Kuwait	Switzerland	12241.8
Kuwait	Türkiye	352.78
Kuwait	USA	118719
Kyrgyzstan	Russian Federation	13
Lao People's Dem. Rep.	Ukraine	17938
Lao People's Dem. Rep.	USA	813209
Latvia	China	26807.2
Latvia	China, Hong Kong SAR	13478.9
Latvia	Estonia	226962
Latvia	Estonia	16351.8
Latvia	Germany	648607
Latvia	India	96.254
Latvia	Italy	6065.1
Latvia	Russian Federation	281169
Latvia	Spain	22294.6
Latvia	United Kingdom	169.859
Latvia	United Kingdom	72829.9
Lebanon	Austria	12298.6
Lebanon	China	908.907
Lebanon	France	28.781
Lebanon	Germany	4418.95
Lebanon	Italy	30712.4
Lebanon	Switzerland	350857
Lesotho	Areas, nes	45.543
Liberia	China	2663
Liberia	Netherlands	40614
Lithuania	Belgium	636
Lithuania	China	14696
Lithuania	Estonia	726694
Lithuania	Germany	2433
Lithuania	Germany	673
Lithuania	Israel	1429
Lithuania	Italy	3471
Lithuania	Italy	802
Lithuania	Latvia	330203
Lithuania	Poland	12665
Lithuania	United Kingdom	1393
Lithuania	USA	880
Luxembourg	Belgium	2.03431e+06
Luxembourg	Belgium	3792.61
Luxembourg	China	6210.88
Luxembourg	Ecuador	28.253
Luxembourg	France	7293.93
Luxembourg	France	30335.3
Luxembourg	French Polynesia	2053.76
Luxembourg	Germany	567440
Luxembourg	Germany	389.74
Luxembourg	Greece	5196.53
Luxembourg	Italy	8548.3
Luxembourg	Japan	2881.65
Luxembourg	Morocco	506.097
Luxembourg	Netherlands	6554.41
Luxembourg	Netherlands	1826.7
Luxembourg	Other Europe, nes	253735
Luxembourg	Other Europe, nes	2328.68
Luxembourg	Switzerland	1.14221e+07
Luxembourg	Türkiye	241.752
Luxembourg	United Kingdom	12268.3
Luxembourg	USA	39.934
Madagascar	France	8589.14
Madagascar	Indonesia	1314.7
Madagascar	USA	742.18
Malawi	United Rep. of Tanzania	2.242
Malaysia	Austria	1606.97
Malaysia	Canada	3308.48
Malaysia	China	8.36473e+07
Malaysia	China	1733.4
Malaysia	China, Hong Kong SAR	2.14635e+07
Malaysia	China, Hong Kong SAR	371699
Malaysia	China, Macao SAR	5734.54
Malaysia	Gabon	1613.26
Malaysia	Germany	5.83283e+06
Malaysia	India	1321.06
Malaysia	Japan	7.17144e+06
Malaysia	Japan	62036.1
Malaysia	New Zealand	10731.9
Malaysia	Other Asia, nes	423400
Malaysia	Singapore	9.7525e+06
Malaysia	Sweden	1.13268e+06
Malaysia	Switzerland	7.30458e+06
Malaysia	United Kingdom	53414.8
Malaysia	USA	256387
Malaysia	Viet Nam	4071.92
Maldives	Italy	159.385
Maldives	Singapore	9613.13
Maldives	Sri Lanka	1488.54
Maldives	Thailand	162.699
Mali	China	7817.38
Mali	Netherlands	2453.41
Malta	Austria	82995.7
Malta	France	379.399
Malta	Germany	4893.79
Malta	Germany	1662.13
Malta	Italy	211.153
Malta	Thailand	6149.42
Malta	United Arab Emirates	1116.74
Malta	United Kingdom	4175.64
Mauritius	France	18105.4
Mauritius	French Polynesia	1618.41
Mauritius	Germany	2085.77
Mauritius	Italy	97450.6
Mauritius	South Africa	648.362
Mauritius	South Africa	31.118
Mauritius	United Arab Emirates	1743.47
Mexico	China	157979
Mexico	China, Hong Kong SAR	66335
Mexico	France	4769
Mexico	Germany	649309
Mexico	Italy	36589
Mexico	Italy	5967
Mexico	Spain	173674
Mexico	United Kingdom	1373971
Mexico	USA	10204718
Mexico	USA	563802
Mongolia	Switzerland	41.81
Mongolia	Thailand	524.86
Montenegro	China	1111.8
Montenegro	Serbia	2606.57
Morocco	China	5942.85
Morocco	China, Hong Kong SAR	366.703
Morocco	France	12728.4
Morocco	Italy	35557.6
Morocco	Russian Federation	10.713
Mozambique	China	121.975
Mozambique	South Africa	237.381
Myanmar	Viet Nam	3870
Namibia	Malaysia	90.227
Namibia	South Africa	1182.89
Namibia	South Africa	1795.08
Nepal	China	2596.6
Nepal	India	1021.67
Nepal	India	3276.38
Nepal	Switzerland	70.686
Netherlands	Australia	110.707
Netherlands	Austria	219345
Netherlands	Austria	213.507
Netherlands	Belgium	88485.6
Netherlands	Belgium	32527.6
Netherlands	Bulgaria	1830.06
Netherlands	Bulgaria	25.982
Netherlands	Canada	22430.6
Netherlands	China	25799.3
Netherlands	China, Hong Kong SAR	77697.3
Netherlands	Croatia	371.66
Netherlands	Croatia	75.688
Netherlands	Cyprus	15.815
Netherlands	Cyprus	7.908
Netherlands	Czechia	1098.04
Netherlands	Czechia	2.259
Netherlands	Denmark	2255.94
Netherlands	Denmark	57773.3
Netherlands	Estonia	878.88
Netherlands	Estonia	14.686
Netherlands	Finland	2086.49
Netherlands	Finland	74.558
Netherlands	France	129762
Netherlands	France	57655.9
Netherlands	Germany	1.00971e+07
Netherlands	Germany	23924.1
Netherlands	Greece	1000.88
Netherlands	Greece	50.835
Netherlands	Hungary	2268.37
Netherlands	Hungary	21.464
Netherlands	Ireland	211.247
Netherlands	Ireland	5.648
Netherlands	Italy	107040
Netherlands	Italy	335.511
Netherlands	Latvia	2776.72
Netherlands	Latvia	10.167
Netherlands	Lithuania	166.061
Netherlands	Lithuania	45.187
Netherlands	Luxembourg	318.566
Netherlands	Luxembourg	10.167
Netherlands	Malaysia	2936
Netherlands	Malta	169.45
Netherlands	Malta	3.389
Netherlands	Mexico	636.002
Netherlands	Philippines	2.259
Netherlands	Poland	3421.76
Netherlands	Poland	136.69
Netherlands	Portugal	3290.72
Netherlands	Portugal	107.318
Netherlands	Romania	327.603
Netherlands	Romania	15.815
Netherlands	Slovakia	155.894
Netherlands	Slovakia	22.593
Netherlands	Slovenia	427.013
Netherlands	Slovenia	14.686
Netherlands	Spain	4622.59
Netherlands	Spain	272.249
Netherlands	Sweden	2318.07
Netherlands	Sweden	32.76
Netherlands	Switzerland	692077
Netherlands	Thailand	698.133
Netherlands	Thailand	264.342
Netherlands	Türkiye	70.039
Netherlands	United Kingdom	1.15027e+06
Netherlands	United Kingdom	150.245
Netherlands	USA	279895
Netherlands	USA	5337.67
New Zealand	Australia	206681
New Zealand	Australia	35079.4
New Zealand	China	200568
New Zealand	China, Hong Kong SAR	4827.59
New Zealand	Germany	469770
New Zealand	Germany	353.914
New Zealand	India	2166.84
New Zealand	Italy	8304.9
New Zealand	Italy	25.584
New Zealand	Japan	2.12651e+06
New Zealand	Japan	19281.2
New Zealand	Other Asia, nes	17.056
New Zealand	Rep. of Korea	805.19
New Zealand	South Africa	42734.8
New Zealand	Spain	51.168
New Zealand	Spain	54.722
New Zealand	Switzerland	120211
New Zealand	Thailand	115514
New Zealand	Thailand	11082.2
New Zealand	United Arab Emirates	136.449
New Zealand	United Kingdom	8308.45
New Zealand	USA	470064
New Zealand	USA	2398.51
Nicaragua	China	199.1
Nicaragua	USA	51.69
Niger	Nigeria	129.163
Niger	Nigeria	2433.66
Nigeria	China	8809.08
Nigeria	China	10.003
Nigeria	Germany	29268.4
Nigeria	Singapore	8.097
Nigeria	USA	664.778
North Macedonia	Germany	165.55
North Macedonia	Italy	2.26452e+07
North Macedonia	South Africa	2.48539e+08
North Macedonia	United Kingdom	6.87519e+08
Norway	Australia	2450.43
Norway	Austria	116650
Norway	China	551.938
Norway	China	81578.8
Norway	China, Hong Kong SAR	7021.5
Norway	Denmark	38849
Norway	Denmark	5983.08
Norway	Fiji	5547.41
Norway	France	426.532
Norway	French Polynesia	20020.2
Norway	Germany	6.28217e+06
Norway	Germany	45540.3
Norway	India	6749.79
Norway	India	336.169
Norway	Indonesia	6439.53
Norway	Ireland	1023.78
Norway	Italy	561905
Norway	Japan	12481.3
Norway	Philippines	342.927
Norway	Poland	277.971
Norway	Spain	521.901
Norway	Sweden	88135.6
Norway	Sweden	1153.69
Norway	Switzerland	9694.46
Norway	Thailand	297.996
Norway	Türkiye	9774.56
Norway	United Kingdom	6.90797e+06
Norway	United Kingdom	1917.77
Norway	USA	214244
Norway	USA	159.574
Oman	United Arab Emirates	4026.01
Oman	United Arab Emirates	1.37223e+06
Oman	Yemen	1.77344e+06
Other Asia, nes	Areas, nes	742368
Other Asia, nes	Australia	192340
Other Asia, nes	Belgium	1348.01
Other Asia, nes	China	200067
Other Asia, nes	China	443534
Other Asia, nes	China, Hong Kong SAR	1.12376e+06
Other Asia, nes	China, Hong Kong SAR	166794
Other Asia, nes	France	1742.57
Other Asia, nes	France	106165
Other Asia, nes	French Polynesia	4405.74
Other Asia, nes	Germany	2.01226e+07
Other Asia, nes	Indonesia	2268.63
Other Asia, nes	Italy	69637.1
Other Asia, nes	Italy	11803.4
Other Asia, nes	Japan	5.9697e+07
Other Asia, nes	Japan	55170.4
Other Asia, nes	Philippines	4307.1
Other Asia, nes	Rep. of Korea	1.25541e+06
Other Asia, nes	Russian Federation	2422930
Other Asia, nes	Singapore	4.08462e+06
Other Asia, nes	South Africa	3.37127e+07
Other Asia, nes	Switzerland	65494.3
Other Asia, nes	Switzerland	1150.75
Other Asia, nes	United Kingdom	4.05187e+06
Other Asia, nes	USA	5.64281e+07
Other Asia, nes	USA	45471.2
Pakistan	Canada	12625.8
Pakistan	Germany	233.878
Pakistan	Switzerland	4108.3
Pakistan	United Arab Emirates	201.328
Pakistan	United Kingdom	6267.63
Palau	Indonesia	20
Panama	Spain	4614
Panama	USA	99179
Panama	USA	9582
Paraguay	Brazil	31
Paraguay	China	1643
Paraguay	China	81
Paraguay	Spain	398
Paraguay	Uruguay	1716
Peru	Brazil	9932.84
Peru	China	222.45
Peru	Czechia	2368.29
Peru	Italy	1699.57
Peru	Spain	556.72
Peru	USA	1172.12
Peru	USA	1165.73
Philippines	Cambodia	224
Philippines	Canada	3112
Philippines	China	312
Philippines	China, Hong Kong SAR	24439
Philippines	China, Hong Kong SAR	62379
Philippines	Italy	932
Philippines	Japan	284246
Philippines	Rep. of Korea	246851
Philippines	Singapore	402
Philippines	Thailand	11039
Philippines	USA	46039
Poland	Austria	10457
Poland	Austria	7
Poland	Belgium	6
Poland	China	375
Poland	China	376526
Poland	China, Hong Kong SAR	145552
Poland	Côte d'Ivoire	161
Poland	Czechia	96796
Poland	Estonia	220829
Poland	Germany	7478512
Poland	Germany	227
Poland	Ireland	1369193
Poland	Israel	1950
Poland	Italy	121756524
Poland	Italy	2136
Poland	Netherlands	3204633
Poland	Netherlands	3
Poland	Spain	7424
Poland	Sweden	1368
Poland	Switzerland	9448
Poland	Thailand	111
Poland	Ukraine	11133
Poland	United Kingdom	394283
Poland	United Kingdom	4318
Poland	USA	187234
Poland	USA	146
Poland	Viet Nam	555
Portugal	Austria	29550.3
Portugal	Canada	6070.3
Portugal	China	3462.28
Portugal	Czechia	14318.1
Portugal	France	3818.23
Portugal	Germany	6.8084e+06
Portugal	Germany	6553.93
Portugal	Indonesia	2386.53
Portugal	Ireland	1870.13
Portugal	Italy	4.99877e+06
Portugal	Spain	50951.2
Portugal	Spain	51528.6
Portugal	Switzerland	276.847
Portugal	Thailand	457.645
Portugal	United Kingdom	881696
Qatar	Albania	5130.94
Qatar	Areas, nes	271.28
Qatar	Areas, nes	25442.7
Qatar	Argentina	95.385
Qatar	Australia	499.881
Qatar	Austria	1968.91
Qatar	Bahrain	51311.2
Qatar	Bangladesh	5666.43
Qatar	Belgium	1327.3
Qatar	Brazil	1065.37
Qatar	Bulgaria	26566.1
Qatar	Cambodia	43382.7
Qatar	Canada	6826.88
Qatar	China	2.65461e+06
Qatar	China, Hong Kong SAR	127829
Qatar	Czechia	67.291
Qatar	Denmark	24396.2
Qatar	Egypt	25561.2
Qatar	France	253741
Qatar	Germany	565895
Qatar	Germany	88051.4
Qatar	Greece	27644.8
Qatar	India	126186
Qatar	Indonesia	14510.4
Qatar	Iran	117.931
Qatar	Italy	59491.7
Qatar	Japan	2981.59
Qatar	Jordan	8306
Qatar	Kuwait	38248
Qatar	Lebanon	50475.5
Qatar	Lithuania	19365.9
Qatar	Malaysia	608.799
Qatar	Mexico	47.033
Qatar	Morocco	3051.16
Qatar	Myanmar	5594.85
Qatar	Netherlands	1406.71
Qatar	New Zealand	7261.49
Qatar	Oman	4348.79
Qatar	Other Asia, nes	6983.47
Qatar	Pakistan	35677.3
Qatar	Philippines	4277.64
Qatar	Poland	3830.88
Qatar	Rep. of Korea	20524
Qatar	Romania	285518
Qatar	Russian Federation	46.129
Qatar	Saudi Arabia	18942.9
Qatar	Singapore	356.123
Qatar	South Africa	134.744
Qatar	Spain	32853.5
Qatar	Sri Lanka	5626.57
Qatar	Sweden	277.068
Qatar	Switzerland	5.61952e+06
Qatar	Switzerland	464674
Qatar	Thailand	19444.4
Qatar	Tunisia	2776.03
Qatar	Türkiye	384.796
Qatar	Türkiye	103722
Qatar	United Arab Emirates	91966
Qatar	United Kingdom	787390
Qatar	USA	9438.29
Qatar	USA	217631
Qatar	Viet Nam	10322.2
Qatar	Yemen	101.033
Rep. of Korea	Areas, nes	1668
Rep. of Korea	Belgium	8329206
Rep. of Korea	Canada	98
Rep. of Korea	China	89068
Rep. of Korea	China	991077
Rep. of Korea	China, Hong Kong SAR	1718982
Rep. of Korea	China, Hong Kong SAR	341
Rep. of Korea	Denmark	125
Rep. of Korea	France	38557
Rep. of Korea	France	7473
Rep. of Korea	Germany	33357939
Rep. of Korea	Germany	40
Rep. of Korea	India	2507562
Rep. of Korea	India	9494
Rep. of Korea	Italy	538
Rep. of Korea	Italy	1898
Rep. of Korea	Japan	77716470
Rep. of Korea	Japan	76560
Rep. of Korea	Mexico	7644
Rep. of Korea	Netherlands	16
Rep. of Korea	New Zealand	32
Rep. of Korea	Norway	464000
Rep. of Korea	Philippines	1811
Rep. of Korea	Poland	365
Rep. of Korea	Russian Federation	178045612
Rep. of Korea	Singapore	120830
Rep. of Korea	South Africa	150012831
Rep. of Korea	Spain	431
Rep. of Korea	Switzerland	2208150
Rep. of Korea	United Kingdom	133026050
Rep. of Korea	USA	8022964
Rep. of Korea	USA	8889
Rep. of Moldova	Germany	65
Rep. of Moldova	Russian Federation	8079
Rep. of Moldova	Spain	1072
Rep. of Moldova	Switzerland	994
Russian Federation	Belarus	3626019
Russian Federation	China	128778
Russian Federation	China, Hong Kong SAR	6587.63
Russian Federation	Estonia	3583.11
Russian Federation	France	7442.34
Russian Federation	Germany	45010.8
Russian Federation	Germany	49353.3
Russian Federation	Italy	15486
Russian Federation	Italy	54534.5
Russian Federation	Japan	65727.7
Russian Federation	Kyrgyzstan	43
Russian Federation	Netherlands	2959.47
Russian Federation	Spain	4540.3
Russian Federation	Ukraine	109837
Russian Federation	United Kingdom	4.27023e+06
Russian Federation	USA	38997.4
Russian Federation	USA	89441.1
Russian Federation	Uzbekistan	523679
Rwanda	Canada	41.946
Rwanda	China	77.897
Rwanda	Kenya	9.958
Rwanda	USA	654.273
Saint Kitts and Nevis	USA	248.889
Saint Lucia	Areas, nes	501.303
Saint Lucia	Aruba	57.359
Saint Lucia	USA	12200.8
Samoa	Cook Isds	135.598
Saudi Arabia	China	150106
Saudi Arabia	Switzerland	42804.3
Saudi Arabia	USA	109446
Senegal	China	15468.3
Senegal	Türkiye	1193.95
Senegal	United Arab Emirates	1464.28
Serbia	Austria	862
Serbia	China	10201
Serbia	Germany	39
Serbia	Hungary	28
Serbia	Italy	2511
Serbia	Nepal	7
Serbia	Slovenia	652
Serbia	Switzerland	2235
Serbia	United Kingdom	7269
Serbia	USA	132
Singapore	Australia	2878.97
Singapore	Australia	75069.2
Singapore	Brazil	64.509
Singapore	Canada	1.23978e+06
Singapore	China	239096
Singapore	China	14303.5
Singapore	China, Hong Kong SAR	2.46669e+06
Singapore	China, Hong Kong SAR	494799
Singapore	France	15526.3
Singapore	France	283919
Singapore	French Polynesia	28708.5
Singapore	Germany	6.59942e+07
Singapore	Germany	4195.96
Singapore	Greece	355.885
Singapore	India	18848.9
Singapore	India	4852.65
Singapore	Indonesia	162412
Singapore	Indonesia	31850.6
Singapore	Italy	7924.42
Singapore	Italy	4690.29
Singapore	Japan	6.66679e+07
Singapore	Japan	207603
Singapore	Jordan	310.221
Singapore	Malaysia	77631.5
Singapore	Malaysia	23905.9
Singapore	Other Asia, nes	1.59254e+07
Singapore	Philippines	710.32
Singapore	Philippines	1268.43
Singapore	Qatar	11728.3
Singapore	Rep. of Korea	196498
Singapore	South Africa	2.33843e+07
Singapore	Spain	15894.5
Singapore	Sweden	1739.56
Singapore	Switzerland	3.60554e+06
Singapore	Thailand	97824.1
Singapore	Thailand	76924.8
Singapore	United Kingdom	3.34938e+06
Singapore	United Kingdom	316081
Singapore	USA	6.91061e+07
Singapore	USA	25028.6
Singapore	Viet Nam	10.147
Slovakia	Austria	24897
Slovakia	Canada	394.259
Slovakia	China	5182.98
Slovakia	Czechia	343738
Slovakia	Czechia	570125
Slovakia	Germany	5.05319e+07
Slovakia	Germany	30383.9
Slovakia	Hungary	4605.71
Slovakia	Italy	53273.5
Slovakia	Other Asia, nes	771.572
Slovakia	Other Europe, nes	2.40694e+07
Slovakia	Other Europe, nes	159529
Slovakia	Poland	57021.8
Slovakia	Russian Federation	5.648
Slovakia	Spain	256.438
Slovakia	Switzerland	849.52
Slovakia	Thailand	39.539
Slovakia	Thailand	508.356
Slovakia	United Kingdom	5198.79
Slovakia	USA	911650
Slovenia	Australia	16632.5
Slovenia	Austria	949710
Slovenia	Canada	1012.77
Slovenia	China	7168.5
Slovenia	Czechia	12722.1
Slovenia	Germany	101618
Slovenia	Germany	8110.75
Slovenia	Hungary	665.4
Slovenia	Italy	184.55
Slovenia	Italy	8225.46
Slovenia	Slovakia	31727
Slovenia	Switzerland	6007.31
Slovenia	United Kingdom	42079.9
Slovenia	United Kingdom	1042.16
Solomon Isds	China, Hong Kong SAR	290.069
Solomon Isds	Italy	2181.11
South Africa	Areas, nes	464973
South Africa	Australia	901.04
South Africa	China	141135
South Africa	China, Hong Kong SAR	2155.32
South Africa	Congo	311.656
South Africa	Czechia	246202
South Africa	Czechia	2505.93
South Africa	Dem. Rep. of the Congo	220.306
South Africa	France	161.082
South Africa	Gabon	900.74
South Africa	Germany	1.31834e+07
South Africa	India	939.097
South Africa	Indonesia	42.035
South Africa	Italy	474824
South Africa	Italy	11023.1
South Africa	Japan	372619
South Africa	Mozambique	213.475
South Africa	Namibia	1030.75
South Africa	Other Asia, nes	4236.11
South Africa	Rep. of Korea	461.779
South Africa	Russian Federation	2.33572e+06
South Africa	South Africa	1.00227e+07
South Africa	South Africa	803.235
South Africa	Spain	97.28
South Africa	Special Categories	10.509
South Africa	Switzerland	210275
South Africa	Switzerland	122.876
South Africa	United Kingdom	1.04926e+07
South Africa	United Kingdom	251.156
South Africa	USA	23026.6
South Africa	USA	2098.35
Spain	Australia	11400.9
Spain	Austria	1451.53
Spain	Belgium	4709.43
Spain	Canada	3333.9
Spain	China	1585.44
Spain	China	292143
Spain	China, Hong Kong SAR	933.286
Spain	Czechia	4263.42
Spain	France	232449
Spain	France	34913.1
Spain	Germany	2.34639e+06
Spain	Germany	20416.7
Spain	Greece	1898
Spain	Haiti	1344.32
Spain	India	430.115
Spain	Ireland	1434.69
Spain	Italy	2.25218e+07
Spain	Italy	41503.9
Spain	Japan	258.697
Spain	Japan	19822.9
Spain	Netherlands	293.717
Spain	Netherlands	4289.07
Spain	Other Europe, nes	26445
Spain	Poland	4898.9
Spain	Portugal	9949.32
Spain	Portugal	10854
Spain	Romania	10.167
Spain	Slovakia	219.158
Spain	Switzerland	457905
Spain	Switzerland	5293.69
Spain	United Kingdom	1.78002e+06
Spain	United Kingdom	261.137
Spain	USA	185457
Spain	USA	38237.5
Spain	Viet Nam	656.797
Sri Lanka	China	497.578
Sri Lanka	China, Hong Kong SAR	324338
Sri Lanka	Germany	198.167
Sri Lanka	Malaysia	165.313
Sri Lanka	Switzerland	274.235
Sri Lanka	USA	10677.2
State of Palestine	China	617.171
State of Palestine	Israel	4873.2
Sweden	Australia	117.196
Sweden	Austria	1.08898e+06
Sweden	Belgium	18634.1
Sweden	Belgium	1054.76
Sweden	Canada	117.196
Sweden	China	269315
Sweden	China, Hong Kong SAR	585.978
Sweden	Denmark	68090.6
Sweden	Denmark	2929.89
Sweden	Finland	13125.9
Sweden	France	4453.43
Sweden	Germany	1.44654e+06
Sweden	Germany	8438.08
Sweden	India	176379
Sweden	India	4453.43
Sweden	Italy	117.196
Sweden	Japan	5859.78
Sweden	Japan	3750.26
Sweden	Netherlands	117.196
Sweden	Norway	2.75796e+06
Sweden	Norway	117.196
Sweden	Switzerland	328265
Sweden	Switzerland	117.196
Sweden	United Kingdom	795406
Sweden	USA	28361.3
Sweden	USA	7031.73
Switzerland	Armenia	54033.2
Switzerland	Australia	250335
Switzerland	Australia	18344.2
Switzerland	Austria	1.57513e+06
Switzerland	Austria	15480.9
Switzerland	Belgium	5.15602e+06
Switzerland	Belgium	1.43595e+07
Switzerland	Brazil	344330
Switzerland	Canada	1.79782e+07
Switzerland	Canada	222.447
Switzerland	China	43568.1
Switzerland	China	204015
Switzerland	China, Hong Kong SAR	8.54689e+06
Switzerland	China, Hong Kong SAR	2.19824e+06
Switzerland	Colombia	1157.94
Switzerland	Czechia	2.0454e+07
Switzerland	Denmark	1407.81
Switzerland	Denmark	2715.07
Switzerland	France	3.43499e+07
Switzerland	France	2.62756e+06
Switzerland	French Polynesia	43948
Switzerland	Germany	8.28523e+07
Switzerland	Germany	1.68678e+06
Switzerland	Ghana	340.272
Switzerland	Hungary	8178.73
Switzerland	India	308355
Switzerland	Indonesia	6480.41
Switzerland	Italy	2.27674e+08
Switzerland	Italy	1.13451e+06
Switzerland	Japan	6.24146e+07
Switzerland	Japan	72932.1
Switzerland	Lebanon	68959.5
Switzerland	Lebanon	203838
Switzerland	Netherlands	1.44127e+06
Switzerland	Netherlands	12981.1
Switzerland	Other Asia, nes	4.32018e+06
Switzerland	Philippines	78.212
Switzerland	Romania	15056.3
Switzerland	Russian Federation	4.73795e+07
Switzerland	Saudi Arabia	5.53784e+07
Switzerland	Serbia	623984
Switzerland	Singapore	34676.3
Switzerland	Singapore	81610.5
Switzerland	South Africa	9.58548e+07
Switzerland	Spain	2.28968e+06
Switzerland	Spain	8451.96
Switzerland	Sweden	253104
Switzerland	Sweden	126233
Switzerland	Thailand	35089.7
Switzerland	Türkiye	5.39494e+06
Switzerland	Türkiye	106.653
Switzerland	Ukraine	2.62248e+07
Switzerland	United Arab Emirates	2.48473e+06
Switzerland	United Arab Emirates	77619.7
Switzerland	United Kingdom	1.21784e+08
Switzerland	United Kingdom	705100
Switzerland	USA	1.95074e+08
Switzerland	USA	1.13773e+06
Thailand	Australia	1.55304e+06
Thailand	Belgium	683.29
Thailand	China	60753.7
Thailand	China	87966.9
Thailand	China, Hong Kong SAR	3.50768e+06
Thailand	China, Hong Kong SAR	10485.5
Thailand	Czechia	77890
Thailand	Denmark	731.22
Thailand	France	112534
Thailand	French Polynesia	47681.6
Thailand	Germany	8.01979e+06
Thailand	India	2102.86
Thailand	Italy	670425
Thailand	Italy	20682.8
Thailand	Japan	3.173e+07
Thailand	Japan	238458
Thailand	Malaysia	45.51
Thailand	New Zealand	454591
Thailand	Other Asia, nes	4957.93
Thailand	Philippines	1248.71
Thailand	Rep. of Korea	2725.19
Thailand	Russian Federation	832871
Thailand	South Africa	2.14198e+06
Thailand	Spain	52917.4
Thailand	Sweden	24886.2
Thailand	Switzerland	189598
Thailand	Thailand	99284.6
Thailand	Thailand	65551.2
Thailand	United Kingdom	430568
Thailand	United Kingdom	202.67
Thailand	USA	5.3157e+06
Thailand	USA	22537
Thailand	Viet Nam	2199.07
Togo	China	3112.24
Trinidad and Tobago	USA	464.634
Tunisia	Switzerland	742.766
Türkiye	Australia	493
Türkiye	Austria	623964
Türkiye	Canada	2574
Türkiye	China	35267
Türkiye	China, Hong Kong SAR	131863
Türkiye	China, Hong Kong SAR	10110
Türkiye	France	29484
Türkiye	French Polynesia	448
Türkiye	Germany	814943
Türkiye	Italy	371752
Türkiye	Italy	3245
Türkiye	Serbia	22348
Türkiye	Switzerland	219363
Türkiye	Syria	408
Türkiye	United Arab Emirates	141405
Türkiye	United Kingdom	916353
Türkiye	USA	531297
Türkiye	USA	445
Uganda	France	528.36
Uganda	Thailand	12.8
Uganda	USA	1077
Ukraine	China	694.46
Ukraine	Czechia	108274
Ukraine	France	14799.1
Ukraine	Germany	861092
Ukraine	Italy	16918.4
Ukraine	Italy	535.24
Ukraine	Japan	3675.14
Ukraine	Poland	8466.52
Ukraine	Russian Federation	293556
Ukraine	Spain	2994.92
Ukraine	United Kingdom	135530
Ukraine	USA	2132.08
United Arab Emirates	Australia	184.343
United Arab Emirates	Bahrain	1979.31
United Arab Emirates	Canada	392.648
United Arab Emirates	China	15402
United Arab Emirates	China, Hong Kong SAR	10829.1
United Arab Emirates	China, Hong Kong SAR	30400.8
United Arab Emirates	Czechia	464.261
United Arab Emirates	France	871.885
United Arab Emirates	France	6146.77
United Arab Emirates	Germany	29599.2
United Arab Emirates	Germany	3384.89
United Arab Emirates	India	1404.77
United Arab Emirates	India	3.66785e+06
United Arab Emirates	Ireland	13754.9
United Arab Emirates	Italy	408783
United Arab Emirates	Italy	11762.8
United Arab Emirates	Japan	3.15938e+06
United Arab Emirates	Kuwait	45694.7
United Arab Emirates	Kuwait	831.586
United Arab Emirates	Lebanon	1065.21
United Arab Emirates	New Zealand	3922.39
United Arab Emirates	Poland	685.364
United Arab Emirates	Rep. of Korea	481.688
United Arab Emirates	Rep. of Korea	898.57
United Arab Emirates	Saudi Arabia	272.294
United Arab Emirates	South Africa	80627.3
United Arab Emirates	Switzerland	4.23284e+06
United Arab Emirates	Türkiye	176728
United Arab Emirates	Türkiye	626.276
United Arab Emirates	United Kingdom	9.86112e+06
United Arab Emirates	United Kingdom	4114.36
United Arab Emirates	USA	2.14903e+06
United Arab Emirates	USA	16752.6
United Arab Emirates	Viet Nam	95.031
United Arab Emirates	Yemen	135.875
United Arab Emirates	Zimbabwe	189911
United Kingdom	Australia	345163
United Kingdom	Australia	79978.7
United Kingdom	Austria	392859
United Kingdom	Austria	993.372
United Kingdom	Belgium	2.26762e+08
United Kingdom	Belgium	36690.4
United Kingdom	Brazil	2705.68
United Kingdom	Bulgaria	5174.3
United Kingdom	Cambodia	2302.41
United Kingdom	Canada	2.92029e+07
United Kingdom	Canada	4707.89
United Kingdom	China	206133
United Kingdom	China	876650
United Kingdom	China, Hong Kong SAR	7.45484e+06
United Kingdom	China, Hong Kong SAR	185936
United Kingdom	Czechia	3442.66
United Kingdom	Denmark	502587
United Kingdom	Estonia	985.642
United Kingdom	France	1.10657e+07
United Kingdom	France	546745
United Kingdom	French Polynesia	1870.79
United Kingdom	Germany	1.33637e+08
United Kingdom	Germany	113975
United Kingdom	Greece	96.632
United Kingdom	Hungary	87714.4
United Kingdom	India	1.19997e+07
United Kingdom	India	31304.8
United Kingdom	Ireland	2.17273e+07
United Kingdom	Ireland	1508.74
United Kingdom	Israel	5777.28
United Kingdom	Italy	2.17001e+08
United Kingdom	Italy	517405
United Kingdom	Japan	2.21387e+08
United Kingdom	Japan	458599
United Kingdom	Kazakhstan	974220
United Kingdom	Luxembourg	434368
United Kingdom	Netherlands	1.08242e+06
United Kingdom	Netherlands	5290.26
United Kingdom	North Macedonia	2.19327e+06
United Kingdom	Norway	9.8921e+07
United Kingdom	Other Asia, nes	2.85201e+06
United Kingdom	Philippines	5997.6
United Kingdom	Poland	2911.83
United Kingdom	Rep. of Korea	2.43589e+07
United Kingdom	Russian Federation	6.51163e+08
United Kingdom	Saudi Arabia	1.05831e+08
United Kingdom	Serbia	851543
United Kingdom	Singapore	285768
United Kingdom	South Africa	1.31778e+09
United Kingdom	Spain	6.97155e+06
United Kingdom	Spain	27036.2
United Kingdom	Sweden	217.743
United Kingdom	Switzerland	3.18007e+08
United Kingdom	Switzerland	33089.2
United Kingdom	Thailand	12689.7
United Kingdom	Thailand	15894
United Kingdom	Türkiye	40522.1
United Kingdom	Ukraine	9431.24
United Kingdom	United Arab Emirates	148911
United Kingdom	United Kingdom	639401
United Kingdom	United Kingdom	3844.65
United Kingdom	USA	5.42612e+07
United Kingdom	USA	897828
United Kingdom	Viet Nam	11720.8
United Rep. of Tanzania	China	4984
United Rep. of Tanzania	USA	6010
Uruguay	China	6273.57
Uruguay	Germany	919.08
Uruguay	Italy	1524.32
Uruguay	Spain	329.74
Uruguay	USA	153398
Uruguay	USA	700
USA	Argentina	483699
USA	Australia	18808
USA	Australia	376296
USA	Austria	3214309
USA	Belgium	87875031
USA	Brazil	123733
USA	Canada	158621263
USA	Canada	839343
USA	Chile	13915
USA	China	3077439
USA	China	15691773
USA	China, Hong Kong SAR	2838
USA	China, Hong Kong SAR	581140
USA	Colombia	17308026
USA	Congo	25080
USA	Costa Rica	123682
USA	Czechia	7446892
USA	Denmark	7785
USA	Denmark	34610
USA	Dominican Rep.	168313
USA	Ethiopia	46741
USA	Fiji	13430
USA	France	7979771
USA	France	69539
USA	French Polynesia	397892
USA	Germany	590145636
USA	Germany	90394
USA	Greece	12685
USA	Guinea	31649
USA	India	305481
USA	India	75114
USA	Indonesia	166787
USA	Ireland	693732
USA	Israel	9551
USA	Israel	60537
USA	Italy	186395323
USA	Italy	373799
USA	Japan	41631817
USA	Japan	1209885
USA	Lao People's Dem. Rep.	23885
USA	Latvia	1052423
USA	Luxembourg	250204
USA	Mexico	576965
USA	Mexico	2169
USA	Netherlands	42515
USA	Netherlands	2349
USA	New Zealand	18260
USA	Norway	106314658
USA	Oman	20603
USA	Other Asia, nes	7392285
USA	Other Asia, nes	5842
USA	Pakistan	7950
USA	Papua New Guinea	4450
USA	Peru	2938
USA	Philippines	32563
USA	Poland	6336
USA	Portugal	11339
USA	Rep. of Korea	8039886
USA	Russian Federation	921982951
USA	Singapore	5222229
USA	Singapore	11800
USA	South Africa	1966194640
USA	Spain	2289
USA	Switzerland	90914611
USA	Switzerland	193658
USA	Thailand	97096
USA	Thailand	269505
USA	Türkiye	107007
USA	United Kingdom	306221067
USA	United Kingdom	162731
USA	Venezuela	36418
USA	Viet Nam	3780
USA	Viet Nam	95703
Uzbekistan	Germany	1864432
Uzbekistan	Russian Federation	986095
Viet Nam	Areas, nes	292466
Viet Nam	Areas, nes	1503.2
Viet Nam	Australia	31874.9
Viet Nam	China	570
Viet Nam	China	114127
Viet Nam	China, Hong Kong SAR	5089
Viet Nam	France	55447.5
Viet Nam	France	50989.7
Viet Nam	Germany	5028.9
Viet Nam	India	30177.7
Viet Nam	India	17209
Viet Nam	Indonesia	1578
Viet Nam	Italy	6586.2
Viet Nam	Italy	6165.6
Viet Nam	Japan	6120284
Viet Nam	Japan	230764
[truncated: 7 more rows]

## Sheet: 2018
source	target	weight
Andorra	China	173.195
Andorra	France	1235.01
Andorra	Germany	1921.38
Andorra	Spain	6629.71
Andorra	Spain	14623.2
Angola	China	16.027
Angola	South Africa	261.536
Antigua and Barbuda	China	22476.4
Antigua and Barbuda	USA	673.133
Antigua and Barbuda	USA	1194.77
Argentina	Austria	4162.7
Argentina	Belgium	2.52369e+06
Argentina	Czechia	84798.8
Argentina	Germany	1.95818e+06
Argentina	Italy	372.4
Argentina	Japan	3.09219e+06
Argentina	South Africa	4.39086e+06
Argentina	United Kingdom	7.25359e+07
Argentina	USA	1.30576e+06
Armenia	China	27006.8
Armenia	China, Hong Kong SAR	2200.69
Armenia	Italy	1275.21
Aruba	Areas, nes	2194.97
Aruba	Netherlands	1664.8
Aruba	Panama	213.966
Aruba	Switzerland	11177.1
Aruba	USA	11932.4
Aruba	USA	19846.9
Australia	Australia	73443
Australia	Australia	99483.2
Australia	Austria	119028
Australia	Belgium	88068.4
Australia	Canada	874.297
Australia	China	9578.14
Australia	China	1.34319e+06
Australia	China, Hong Kong SAR	720720
Australia	Czechia	4384.22
Australia	Denmark	6628.63
Australia	Fiji	1018.13
Australia	France	2435.39
Australia	France	89015.3
Australia	French Polynesia	4995.91
Australia	Germany	3.6404e+06
Australia	Germany	24010.8
Australia	Italy	335486
Australia	Italy	4313.04
Australia	Japan	211389
Australia	Japan	39079.9
Australia	New Zealand	1.43896e+06
Australia	Philippines	1724.15
Australia	Portugal	1287.85
Australia	Rep. of Korea	39225.6
Australia	Rep. of Korea	1773.92
Australia	Russian Federation	8323.03
Australia	South Africa	2.08276e+06
Australia	Spain	14414.2
Australia	Spain	21188.7
Australia	Switzerland	4.9921e+06
Australia	Thailand	115979
Australia	Thailand	20893
Australia	Türkiye	824.611
Australia	United Kingdom	1.68872e+07
Australia	United Kingdom	11692.6
Australia	USA	7.73301e+06
Australia	USA	328536
Austria	Australia	2456.66
Austria	Belgium	522226
Austria	China	566515
Austria	China, Hong Kong SAR	8391.6
Austria	Cook Isds	590.542
Austria	Czechia	113171
Austria	Czechia	33005.4
Austria	Denmark	5531.02
Austria	Estonia	72673.3
Austria	France	19559.9
Austria	France	9475.84
Austria	French Polynesia	758.256
Austria	Germany	5.62095e+07
Austria	Germany	528854
Austria	Greece	20835.5
Austria	Hungary	267487
Austria	Hungary	12755.7
Austria	India	227.949
Austria	India	124.014
Austria	Italy	240505
Austria	Italy	152891
Austria	Japan	1.0934e+07
Austria	Japan	1473.99
Austria	Netherlands	2806.26
Austria	Poland	124117
Austria	Poland	80.314
Austria	Portugal	4821.19
Austria	Russian Federation	727.548
Austria	Sierra Leone	4606.23
Austria	Singapore	390.939
Austria	Slovakia	7752.64
Austria	Slovakia	35432.5
Austria	Slovenia	25094.5
Austria	Slovenia	3109.8
Austria	South Africa	325113
Austria	Spain	425.19
Austria	Spain	1055.89
Austria	Sweden	1.13326e+06
Austria	Switzerland	2.14679e+07
Austria	Switzerland	596.448
Austria	Thailand	648682
Austria	Thailand	33538.1
Austria	United Kingdom	1.20037e+07
Austria	United Kingdom	26502.3
Austria	USA	89028.9
Austria	USA	19601.3
Azerbaijan	China	3699.24
Azerbaijan	Türkiye	477.62
Azerbaijan	USA	2327.75
Bahamas	Japan	776.99
Bahamas	Thailand	2450.98
Bahamas	USA	1828.97
Bahamas	USA	40797.9
Bahrain	Austria	54.229
Bahrain	Belgium	8772.01
Bahrain	China	4977.7
Bahrain	China	21319.4
Bahrain	France	1611.35
Bahrain	Syria	137.101
Bahrain	United Kingdom	19056.7
Bahrain	USA	1060.24
Barbados	China	391568
Barbados	China, Hong Kong SAR	13789.5
Barbados	India	14421.5
Barbados	Italy	19374
Barbados	Japan	101.5
Barbados	Other Asia, nes	264
Barbados	Thailand	25616
Barbados	United Kingdom	1231.5
Barbados	USA	1847
Barbados	USA	125546
Belgium	Austria	256757
Belgium	China	7862.98
Belgium	Czechia	272457
Belgium	France	170559
Belgium	France	102631
Belgium	Germany	2.71757e+08
Belgium	Germany	11212.9
Belgium	India	160.349
Belgium	Italy	1.87778e+06
Belgium	Japan	18345.8
Belgium	Luxembourg	27153.9
Belgium	Netherlands	483158
Belgium	Netherlands	252.094
Belgium	South Africa	5.23863e+06
Belgium	Spain	2390.37
Belgium	Spain	3664.12
Belgium	Switzerland	3.22318e+06
Belgium	Switzerland	5909.59
Belgium	United Arab Emirates	1.66365e+06
Belgium	United Kingdom	2.03156e+07
Belgium	USA	314540
Belgium	USA	19017.4
Bermuda	USA	2062.49
Bolivia (Plurinational State of)	China	2055.46
Bolivia (Plurinational State of)	China	74.13
Bolivia (Plurinational State of)	Germany	5685.63
Bolivia (Plurinational State of)	Spain	678.44
Bolivia (Plurinational State of)	USA	5491.67
Bosnia Herzegovina	Austria	4782.83
Bosnia Herzegovina	China	9856.38
Bosnia Herzegovina	Croatia	831.06
Bosnia Herzegovina	Germany	9070.47
Bosnia Herzegovina	Italy	292.88
Bosnia Herzegovina	Slovenia	2274.82
Bosnia Herzegovina	Slovenia	388.48
Bosnia Herzegovina	Thailand	24.05
Bosnia Herzegovina	Viet Nam	400.47
Botswana	China	5.332
Botswana	South Africa	3232.1
Brazil	Austria	260
Brazil	Belgium	68076084
Brazil	China	12960
Brazil	China	19533
Brazil	China, Hong Kong SAR	5713
Brazil	Czechia	134700
Brazil	France	4447
Brazil	Germany	53481430
Brazil	Germany	1929
Brazil	Italy	190695
Brazil	Japan	566148
Brazil	Norway	10033455
Brazil	Peru	735664
Brazil	Russian Federation	93416597
Brazil	South Africa	137428013
Brazil	Spain	455
Brazil	Switzerland	26441
Brazil	United Kingdom	2799573
Brazil	USA	19502117
Brazil	USA	24684
Brunei Darussalam	China	69.622
Bulgaria	Austria	66359.6
Bulgaria	China	50082
Bulgaria	China, Hong Kong SAR	24964.7
Bulgaria	Germany	402133
Bulgaria	Japan	1.02732e+06
Bulgaria	Romania	6342.97
Bulgaria	Slovenia	328.157
Bulgaria	Spain	340.222
Bulgaria	Türkiye	312799
Bulgaria	United Kingdom	2.97101e+06
Bulgaria	USA	1878.46
Burkina Faso	China	5280.36
Burkina Faso	Switzerland	401.123
Cameroon	France	87.481
Cameroon	France	12453.7
Cameroon	Italy	145.808
Canada	Areas, nes	94547.3
Canada	Areas, nes	547.306
Canada	Australia	4349.88
Canada	Australia	7365.08
Canada	Belgium	2.42898e+07
Canada	Brazil	2739.62
Canada	China	25326.6
Canada	China	946813
Canada	China, Hong Kong SAR	66116.7
Canada	Czechia	12930.8
Canada	Fiji	1257.49
Canada	France	15921.3
Canada	France	986052
Canada	French Polynesia	1800.94
Canada	Germany	3.57339e+07
Canada	Germany	8911.28
Canada	India	10814.1
Canada	Indonesia	988.084
Canada	Italy	1.89839e+07
Canada	Italy	5307.09
Canada	Japan	4.74728e+06
Canada	Japan	9537.32
Canada	Mexico	189.897
Canada	Netherlands	1956.87
Canada	Norway	1.12303e+07
Canada	Pakistan	461.62
Canada	Philippines	1030.54
Canada	Poland	221413
Canada	Poland	193.757
Canada	Rep. of Korea	2.65315e+06
Canada	Rep. of Korea	153.616
Canada	Russian Federation	6.58388e+07
Canada	Slovenia	486.322
Canada	South Africa	1.3721e+08
Canada	Spain	24625.7
Canada	Sweden	2269.51
Canada	Switzerland	2.81352e+07
Canada	Switzerland	173.687
Canada	Thailand	32611.4
Canada	Türkiye	32049.4
Canada	Uganda	54.036
Canada	United Kingdom	2.52134e+07
Canada	USA	6.09985e+07
Canada	USA	1.90814e+06
Canada	Viet Nam	4794.52
Chile	Areas, nes	1231.17
Chile	Austria	12131.5
Chile	China	47.259
Chile	China	1462.96
Chile	China, Hong Kong SAR	1360.96
Chile	Costa Rica	1813.51
Chile	Germany	16587.7
Chile	Italy	4834.58
Chile	Mexico	680.49
Chile	Spain	99715.5
Chile	Türkiye	157.87
Chile	USA	2437.52
Chile	USA	6982.68
China	Areas, nes	53074102
China	Australia	799817
China	Australia	3889
China	Austria	544063
China	Austria	78920
China	Belgium	39879234
China	Belgium	1204
China	Canada	311014
China	Canada	289
China	China	36121
China	China	404989
China	China, Hong Kong SAR	216353649
China	China, Hong Kong SAR	38706
China	Colombia	960
China	Czechia	157
China	Denmark	2523
China	France	336472
China	French Polynesia	126
China	Germany	167735624
China	Germany	279787
China	India	46
China	Indonesia	6203
China	Indonesia	34
China	Ireland	159260
China	Israel	6374
China	Israel	958
China	Italy	31102468
China	Italy	193960
China	Japan	306817807
China	Japan	849279
China	Lebanon	1807
China	Lithuania	150
China	Malaysia	8850
China	Netherlands	12115
China	Norway	6914846
China	Other Asia, nes	30661561
China	Other Asia, nes	39090
China	Poland	571
China	Portugal	14367
China	Portugal	13373
China	Rep. of Korea	2007454
China	Rep. of Korea	20855
China	Russian Federation	282926888
China	Singapore	6432454
China	South Africa	1881218534
China	Spain	8633
China	Switzerland	25717003
China	Switzerland	5829
China	Thailand	13903
China	Thailand	105697
China	United Kingdom	91405071
China	United Kingdom	17196
China	USA	55529781
China	USA	43597
China	Viet Nam	743
China, Hong Kong SAR	Australia	197975
China, Hong Kong SAR	Austria	150091
China, Hong Kong SAR	Bahrain	208.331
China, Hong Kong SAR	Belgium	9.22685e+06
China, Hong Kong SAR	Belgium	51076.7
China, Hong Kong SAR	Canada	1434.71
China, Hong Kong SAR	China	2.05274e+07
China, Hong Kong SAR	China	8.03254e+06
China, Hong Kong SAR	China, Macao SAR	13868.7
China, Hong Kong SAR	Fiji	3855.58
China, Hong Kong SAR	France	327850
China, Hong Kong SAR	Germany	1.32631e+08
China, Hong Kong SAR	Germany	928137
China, Hong Kong SAR	India	9.59692e+07
China, Hong Kong SAR	Italy	4.20481e+06
China, Hong Kong SAR	Italy	351830
China, Hong Kong SAR	Japan	2.51398e+08
China, Hong Kong SAR	Japan	1.03565e+07
China, Hong Kong SAR	Malaysia	8269.31
China, Hong Kong SAR	Netherlands	7751.74
China, Hong Kong SAR	Other Asia, nes	2.27338e+06
China, Hong Kong SAR	Other Asia, nes	1.2542e+06
China, Hong Kong SAR	Philippines	4495.76
China, Hong Kong SAR	Rep. of Korea	2.19624e+06
China, Hong Kong SAR	Rep. of Korea	10183.6
China, Hong Kong SAR	Russian Federation	2.07004e+08
China, Hong Kong SAR	Saudi Arabia	12260
China, Hong Kong SAR	Singapore	76644.9
China, Hong Kong SAR	South Africa	4.32781e+08
China, Hong Kong SAR	Spain	36.359
China, Hong Kong SAR	Switzerland	5.1114e+08
China, Hong Kong SAR	Switzerland	1.90914e+06
China, Hong Kong SAR	Thailand	128138
China, Hong Kong SAR	Thailand	46460.8
China, Hong Kong SAR	United Arab Emirates	6.35001e+06
China, Hong Kong SAR	United Kingdom	1.64324e+09
China, Hong Kong SAR	United Kingdom	2.7464e+06
China, Hong Kong SAR	USA	3.24736e+07
China, Hong Kong SAR	USA	2.25611e+06
China, Macao SAR	Australia	9848.49
China, Macao SAR	China	185.073
China, Macao SAR	China, Hong Kong SAR	18901.9
China, Macao SAR	Japan	1.43142e+06
China, Macao SAR	Other Asia, nes	247.754
China, Macao SAR	Spain	61.071
China, Macao SAR	USA	9212.25
Colombia	Australia	195.99
Colombia	China	2438.24
Colombia	China	7197.34
Colombia	Czechia	3087.9
Colombia	Germany	146.13
Colombia	Italy	306613
Colombia	Spain	19148.8
Colombia	United Kingdom	68.87
Colombia	USA	460358
Colombia	USA	1093.69
Congo	France	80910.5
Costa Rica	Areas, nes	185.14
Costa Rica	China	132334
Costa Rica	China	2308.9
Costa Rica	El Salvador	1581.02
Costa Rica	Fr. South Antarctic Terr.	36957.6
Costa Rica	France	1.41809e+06
Costa Rica	Germany	1.19876e+06
Costa Rica	Ireland	3602.53
Costa Rica	Mexico	42.54
Costa Rica	Mexico	160.18
Costa Rica	Nicaragua	2.5
Costa Rica	Panama	11440.2
Costa Rica	Russian Federation	29.38
Costa Rica	Spain	21698.2
Costa Rica	Switzerland	860766
Costa Rica	USA	8.6239e+06
Costa Rica	USA	3445.2
Côte d'Ivoire	Areas, nes	89.836
Côte d'Ivoire	China	2237.13
Côte d'Ivoire	France	711.12
Côte d'Ivoire	Ghana	97.921
Côte d'Ivoire	Mali	1078.22
Côte d'Ivoire	Nigeria	3065.03
Côte d'Ivoire	South Africa	104.477
Côte d'Ivoire	Spain	231.601
Côte d'Ivoire	United Kingdom	1324.38
Croatia	Austria	20645
Croatia	Germany	125912
Croatia	Hungary	4024
Croatia	Slovenia	14687
Croatia	Slovenia	14839
Croatia	Spain	801
Croatia	Thailand	116
Croatia	United Kingdom	1104
Cuba	Mexico	80.55
Cuba	Panama	598.31
Cuba	Spain	5985.2
Curaçao	Areas, nes	279.329
Curaçao	Spain	670.39
Curaçao	USA	12122.9
Curaçao	USA	670.39
Curaçao	Venezuela	167.597
Cyprus	China	12793.3
Cyprus	Germany	18235.1
Cyprus	Italy	11896.9
Cyprus	Italy	1917.87
Cyprus	Spain	12.99
Cyprus	United Kingdom	129.905
Cyprus	USA	1917.87
Czechia	Austria	428844
Czechia	Brazil	50193
Czechia	China	8900
Czechia	China	211863
Czechia	France	15893
Czechia	French Polynesia	124
Czechia	Germany	10050222
Czechia	Germany	52951
Czechia	Italy	2113337
Czechia	Italy	5045
Czechia	Japan	14879
Czechia	Other Asia, nes	1813
Czechia	Other Europe, nes	3121
Czechia	Poland	20824
Czechia	Poland	327
Czechia	Romania	38860
Czechia	Russian Federation	9979291
Czechia	Slovakia	26537
Czechia	Slovakia	33041
Czechia	South Africa	1204350
Czechia	Spain	10996
Czechia	Switzerland	1056339
Czechia	Switzerland	18537
Czechia	Thailand	4490
Czechia	Türkiye	575
Czechia	United Arab Emirates	81
Czechia	United Kingdom	3819250
Czechia	United Kingdom	8
Czechia	USA	330989
Czechia	USA	4156
Czechia	Viet Nam	2221
Denmark	Australia	9674.54
Denmark	Austria	2508.94
Denmark	Belgium	1900.99
Denmark	Bulgaria	2139.16
Denmark	Canada	1113.61
Denmark	China	14286.2
Denmark	China, Hong Kong SAR	82469.8
Denmark	Czechia	9189.95
Denmark	Estonia	457.668
Denmark	Finland	90.583
Denmark	Finland	3.642
Denmark	France	823.644
Denmark	France	42468.6
Denmark	French Polynesia	139487
Denmark	Germany	6.66396e+06
Denmark	Germany	17943.9
Denmark	Greece	1217.33
Denmark	Hungary	736.862
Denmark	India	6929.48
Denmark	Ireland	865437
Denmark	Italy	710.257
Denmark	Italy	4663.62
Denmark	Japan	25525.4
Denmark	Lithuania	6131.01
Denmark	Lithuania	162.955
Denmark	Netherlands	49079.8
Denmark	Norway	659.422
Denmark	Poland	3.959
Denmark	Romania	1859.65
Denmark	Slovakia	3610.51
Denmark	Spain	65.562
Denmark	Spain	451.65
Denmark	Sweden	26861.2
Denmark	Sweden	3916.63
Denmark	Switzerland	590967
Denmark	Thailand	2923.22
Denmark	United Kingdom	988994
Denmark	United Kingdom	43088.6
Denmark	USA	150363
Denmark	USA	7797.94
Dominican Rep.	China	2615.72
Dominican Rep.	Spain	2087.67
Dominican Rep.	USA	3.15499e+07
Dominican Rep.	USA	902.69
Ecuador	China	142.275
Ecuador	China	126.465
Ecuador	Germany	1278.21
Ecuador	Spain	4074.03
Ecuador	USA	783.5
Ecuador	USA	1041.7
Egypt	China	473.96
Egypt	Czechia	9882.44
Egypt	France	5483.57
Egypt	Germany	361557
Egypt	USA	1501.55
El Salvador	China	3409.26
El Salvador	Spain	4022.5
El Salvador	USA	1497.85
El Salvador	USA	29.79
Estonia	China	112164
Estonia	Other Europe, nes	6138.93
Estonia	Other Europe, nes	13932.5
Estonia	Sweden	85.328
Estonia	USA	797.697
Estonia	Viet Nam	403.392
Eswatini	South Africa	85.646
Eswatini	South Africa	181.786
Ethiopia	China	157.308
Ethiopia	China	47572
Ethiopia	Egypt	218.081
Ethiopia	Germany	1312.77
Ethiopia	India	3896.21
Fiji	China, Hong Kong SAR	42111.1
Fiji	Switzerland	170.069
Finland	Belgium	3950.02
Finland	Bulgaria	61195.3
Finland	Canada	7862.33
Finland	China	116888
Finland	Denmark	2079.33
Finland	Denmark	47.15
Finland	France	76652.4
Finland	France	4351.98
Finland	Germany	80246.4
Finland	Germany	48.329
Finland	India	8.251
Finland	Japan	562.268
Finland	Japan	199.21
Finland	Sweden	394918
Finland	Sweden	5673.37
Finland	Switzerland	296722
Finland	United Kingdom	238804
Finland	United Kingdom	5588.5
Finland	USA	21171.7
Finland	USA	10928.3
Finland	Viet Nam	108.446
France	Areas, nes	111850
France	Areas, nes	4123.31
France	Australia	17795.2
France	Austria	448271
France	Belgium	1.92954e+06
France	Belgium	2.363
France	Brazil	855558
France	Brazil	441.868
France	Canada	2505.89
France	China	382445
France	China, Hong Kong SAR	319292
France	Côte d'Ivoire	186.671
France	Czechia	457209
France	France	277882
France	France	43550
France	French Polynesia	10051.9
France	Germany	2.43413e+07
France	Germany	5917.95
France	Hungary	11394
France	India	7609.81
France	Ireland	7334.53
France	Ireland	3900.01
France	Israel	5945.13
France	Italy	3.44695e+07
France	Italy	17009.5
France	Japan	1.95999e+06
France	Japan	155832
France	Luxembourg	96594.1
France	Netherlands	6692.99
France	Niger	10433.5
France	Peru	10607.2
France	Philippines	18149.7
France	Portugal	16255.8
France	Slovakia	4270.99
France	Spain	7.32702e+06
France	Spain	669.89
France	Sweden	1609.15
France	Switzerland	2.24873e+07
France	Switzerland	8873.98
France	Thailand	1682.4
France	Thailand	294.185
France	United Kingdom	4.29545e+06
France	United Kingdom	37834
France	USA	1.69625e+07
France	USA	72904.6
French Polynesia	Areas, nes	79.439
French Polynesia	France	27.35
French Polynesia	USA	1012.01
Gabon	Côte d'Ivoire	237.083
Gabon	France	1218.55
Gabon	Spain	417.015
Georgia	China	33.14
Georgia	Poland	367.93
Georgia	Spain	53.03
Germany	Australia	245489
Germany	Australia	1150.43
Germany	Austria	6.60558e+07
Germany	Austria	20033.4
Germany	Azerbaijan	207819
Germany	Belgium	5.54956e+08
Germany	Belgium	178.353
Germany	Brazil	2.15809e+06
Germany	Canada	161045
Germany	China	2.18399e+06
Germany	China	3.61833e+06
Germany	China, Hong Kong SAR	4.24611e+06
Germany	China, Hong Kong SAR	958281
Germany	Croatia	9325.13
Germany	Cyprus	425570
Germany	Czechia	9.0327e+06
Germany	Czechia	22503.2
Germany	Denmark	61015.5
Germany	Denmark	1015.78
Germany	Estonia	162041
Germany	Fiji	4614.73
Germany	Finland	192323
Germany	Finland	42.521
Germany	France	8.83992e+07
Germany	France	82023.4
Germany	French Polynesia	24381.2
Germany	Ghana	8351.87
Germany	Greece	33004.7
Germany	Hungary	2.2535e+07
Germany	India	189720
Germany	India	3934.39
Germany	Indonesia	22861
Germany	Indonesia	28232.9
Germany	Iran	423661
Germany	Ireland	2.05589e+06
Germany	Israel	13708.4
Germany	Israel	800.816
Germany	Italy	1.17405e+08
Germany	Italy	27473.4
Germany	Japan	4.87549e+07
Germany	Japan	179082
Germany	Latvia	2.46613e+06
Germany	Lithuania	1.3713e+07
Germany	Luxembourg	1.66393e+06
Germany	Malaysia	86684.2
Germany	Mexico	6.9354e+06
Germany	Netherlands	4.70582e+07
Germany	Netherlands	16611.6
Germany	New Zealand	556439
Germany	Norway	2.82152e+06
Germany	Norway	19136.9
Germany	Oman	4488.35
Germany	Other Asia, nes	2.26432e+06
Germany	Philippines	1221.3
Germany	Poland	8.80015e+06
Germany	Poland	6719.53
Germany	Portugal	246019
Germany	Rep. of Korea	5.1857e+06
Germany	Romania	4532.05
Germany	Russian Federation	6.5664e+08
Germany	Saudi Arabia	3.28664e+06
Germany	Singapore	3.2507e+06
Germany	Slovakia	1.37748e+06
Germany	Slovenia	31946.4
Germany	South Africa	1.06547e+09
Germany	Spain	1.01434e+06
Germany	Sweden	64196.4
Germany	Sweden	46.065
Germany	Switzerland	1.97193e+08
Germany	Switzerland	35781.6
Germany	Thailand	1.68757e+06
Germany	Thailand	231647
Germany	Türkiye	1770.54
Germany	Ukraine	412478
Germany	United Arab Emirates	559828
Germany	United Kingdom	5.1996e+08
Germany	United Kingdom	4506.06
Germany	USA	9.39865e+08
Germany	USA	144359
Germany	Viet Nam	734.672
Ghana	South Africa	28.606
Greece	Austria	32185.4
Greece	China, Hong Kong SAR	37382.6
Greece	Cyprus	822.723
Greece	France	9250.62
Greece	Germany	40320.5
Greece	Germany	816.822
Greece	Italy	15972.9
Greece	Italy	2265.14
Greece	Netherlands	61.38
Greece	Portugal	237.256
Greece	Spain	10056.8
Greece	Switzerland	38345.8
Greece	United Kingdom	1741.06
Greece	United Kingdom	289.193
Greece	USA	3653.27
Greenland	India	97.94
Grenada	USA	73.704
Guatemala	Canada	1146
Guatemala	China	5955
Guatemala	Costa Rica	236
Guatemala	El Salvador	394
Guatemala	Mexico	5
Guatemala	Panama	1376
Guatemala	Spain	1860
Guatemala	USA	4772
Guatemala	USA	1896
Honduras	China	870.99
Honduras	Spain	1393.19
Honduras	USA	382.88
Hungary	Austria	864
Hungary	Belgium	88
Hungary	Bulgaria	54
Hungary	Canada	113
Hungary	China	2442
Hungary	China, Hong Kong SAR	5260
Hungary	Czechia	363
Hungary	Germany	212990
Hungary	Germany	8417
Hungary	Italy	220700
Hungary	Japan	615
Hungary	Norway	12
Hungary	Poland	21833
Hungary	Portugal	17
Hungary	Spain	692
Hungary	Switzerland	76799
Hungary	Switzerland	672
Hungary	United Arab Emirates	180
Hungary	United Kingdom	7756
Hungary	USA	15499
Hungary	USA	1071
Hungary	Viet Nam	5571
Iceland	Austria	672.802
Iceland	Belgium	1581.62
Iceland	China	2208.81
Iceland	China, Hong Kong SAR	907.692
Iceland	Denmark	1488.82
Iceland	Germany	54124.6
Iceland	Germany	284.449
Iceland	Italy	7158.44
Iceland	Netherlands	517.204
Iceland	United Kingdom	61.13
Iceland	United Kingdom	2429.37
Iceland	USA	20830.9
India	Belgium	5.6701e+06
India	Canada	38326.3
India	China	63135.1
India	China	596.592
India	China, Hong Kong SAR	465959
India	Czechia	593993
India	Egypt	1.99859e+06
India	France	14031.4
India	Germany	5.35961e+07
India	Germany	159.373
India	Iran	2.03647e+06
India	Italy	7.91088e+06
India	Japan	2.00685e+07
India	Norway	3.44083e+06
India	Poland	11939.6
India	Russian Federation	6.96081e+06
India	Singapore	794.804
India	South Africa	6.59175e+07
India	Spain	325545
India	Spain	823.51
India	Switzerland	560232
India	Thailand	52075.8
India	Thailand	2000.21
India	Tunisia	2.06912e+06
India	United Arab Emirates	137843
India	United Kingdom	9.89404e+07
India	USA	1.47566e+07
India	USA	30.546
Indonesia	Australia	50271
Indonesia	Austria	247
Indonesia	China	37774
Indonesia	China	3467
Indonesia	China, Hong Kong SAR	4696
Indonesia	China, Hong Kong SAR	705
Indonesia	Germany	1208
Indonesia	India	6549
Indonesia	Italy	95071
Indonesia	Japan	30141
Indonesia	Japan	520
Indonesia	Malta	121
Indonesia	Other Asia, nes	8602
Indonesia	Rep. of Korea	88433
Indonesia	Singapore	42351
Indonesia	Sweden	235
Indonesia	Switzerland	2448
Indonesia	Thailand	261216
Indonesia	United Arab Emirates	285936
Indonesia	United Kingdom	1995
Indonesia	USA	2340
Indonesia	USA	249
Indonesia	Viet Nam	220
Iran	China	167300
Iran	Germany	20333
Iran	India	5165
Iran	Other Asia, nes	901446
Ireland	Areas, nes	527057
Ireland	Australia	15391.4
Ireland	Canada	9035.48
Ireland	Canada	61.41
Ireland	China	116.914
Ireland	China	31857.4
Ireland	China, Hong Kong SAR	5134.79
Ireland	Germany	1.21989e+08
Ireland	Germany	1145.53
Ireland	India	5.905
Ireland	Israel	857.373
Ireland	Italy	225689
Ireland	Japan	9146.49
Ireland	Netherlands	8.22698e+06
Ireland	Spain	1077.03
Ireland	Switzerland	152759
Ireland	Türkiye	2193.03
Ireland	United Arab Emirates	46.057
Ireland	United Kingdom	3.15268e+06
Ireland	United Kingdom	121393
Ireland	USA	1.88695e+07
Ireland	USA	4833.65
Israel	Austria	31000
Israel	China	16000
Israel	China, Hong Kong SAR	87000
Israel	Czechia	67000
Israel	Germany	621000
Israel	India	22000
Israel	Italy	20000
Israel	Rep. of Korea	416000
Israel	South Africa	135000
Israel	Switzerland	55000
Israel	Türkiye	46000
Israel	United Kingdom	907000
Israel	USA	5817000
Israel	USA	5000
Italy	Australia	6305.98
Italy	Austria	442937
Italy	Belgium	6.16628e+07
Italy	Brazil	247021
Italy	China	567843
Italy	China	792545
Italy	China, Hong Kong SAR	40532
Italy	Colombia	79031
Italy	Croatia	1.58834e+06
Italy	Czechia	3.58705e+06
Italy	Egypt	238667
Italy	France	3.54015e+07
Italy	France	208204
Italy	French Polynesia	1.05754e+06
Italy	Germany	2.11474e+08
Italy	Germany	51822.5
Italy	Greece	114642
Italy	Hungary	36471.8
Italy	India	320030
Italy	Indonesia	3.08378e+06
Italy	Ireland	245573
Italy	Israel	250205
Italy	Japan	1.1142e+07
Italy	Japan	79036.9
Italy	Luxembourg	219.852
Italy	Malaysia	59000.8
Italy	Malta	10837.8
Italy	Netherlands	106401
Italy	Netherlands	295.5
Italy	New Zealand	6480.91
Italy	Norway	5.54411e+06
Italy	Other Asia, nes	7.61592e+06
Italy	Poland	441677
Italy	Poland	6064.85
Italy	Portugal	37403.3
Italy	Romania	128805
Italy	Russian Federation	5.63616e+08
Italy	Russian Federation	1453.86
Italy	Singapore	85391.3
Italy	Slovakia	33864.3
Italy	South Africa	2.02508e+08
Italy	Spain	5.66868e+06
Italy	Spain	82178.7
Italy	Sweden	25657.7
Italy	Switzerland	1.77821e+08
Italy	Switzerland	20123.6
Italy	Thailand	30061.8
Italy	Thailand	6302.43
Italy	Türkiye	1.46838e+06
Italy	Türkiye	4477.42
Italy	United Kingdom	3.26224e+07
Italy	United Kingdom	3997.53
Italy	USA	1.85642e+08
Italy	USA	142606
Italy	Viet Nam	122514
Jamaica	USA	1342.35
Japan	Australia	2.87777e+06
Japan	Austria	4652.07
Japan	Belgium	1.18107e+07
Japan	Brazil	31225
Japan	Brazil	5122.71
Japan	China	3.25651e+06
Japan	China	1.89963e+06
Japan	China, Hong Kong SAR	52702.4
Japan	China, Hong Kong SAR	105106
Japan	Denmark	1828.25
Japan	France	18336.8
Japan	France	230839
Japan	Germany	1.25688e+08
Japan	Germany	5086.51
Japan	Indonesia	106455
Japan	Italy	9.47715e+06
Japan	Italy	101513
Japan	Malaysia	11494.4
Japan	Norway	5.76079e+07
Japan	Other Asia, nes	8.97513e+07
Japan	Philippines	5.27944e+06
Japan	Philippines	30319.9
Japan	Portugal	3620.29
Japan	Rep. of Korea	1.70686e+07
Japan	Rep. of Korea	24907.6
Japan	Russian Federation	1.0679e+09
Japan	Singapore	5.80587e+06
Japan	Slovakia	113614
Japan	South Africa	2.48655e+09
Japan	Spain	22264.8
Japan	Switzerland	3.91692e+07
Japan	Switzerland	3864.66
Japan	Thailand	498360
Japan	Thailand	144377
Japan	United Kingdom	1.10775e+08
Japan	United Kingdom	21079.2
Japan	USA	1.1754e+08
Japan	USA	100490
Japan	Viet Nam	305598
Japan	Viet Nam	222684
Jordan	Germany	746.479
Jordan	Italy	72012.7
Jordan	United Kingdom	804.226
Kazakhstan	China	2067.7
Kazakhstan	Germany	4979.51
Kazakhstan	Japan	2751.98
Kazakhstan	Russian Federation	17503.9
Kazakhstan	Russian Federation	11291.8
Kenya	Belgium	2359.39
Kenya	China	990.638
Kenya	India	6.423
Kenya	South Africa	2316.36
Kuwait	China	49556
Kuwait	Germany	81655
Kuwait	India	1699
Kuwait	Spain	455
Kuwait	United Kingdom	409
Kuwait	USA	168302
Lao People's Dem. Rep.	USA	339290
Latvia	Belgium	355.937
Latvia	China	33868.2
Latvia	China, Hong Kong SAR	8290.26
Latvia	Estonia	8541.31
Latvia	Germany	267927
Latvia	India	1525.11
Latvia	Italy	782.59
Latvia	Lithuania	130835
Latvia	Lithuania	2825.1
Latvia	Poland	54.216
Latvia	Spain	38841.9
Latvia	USA	1747.86
Lebanon	Austria	20070.5
Lebanon	China	663.49
Lebanon	France	25777.4
Lebanon	Germany	744.415
Lebanon	Italy	87.043
Lebanon	South Africa	1.78319e+06
Lebanon	Switzerland	319379
Lebanon	USA	325.577
Lebanon	USA	2632.53
Lesotho	Indonesia	152.827
Lesotho	South Africa	398.975
Lesotho	South Africa	106.505
Liberia	China	1634.2
Liberia	Spain	96324.8
Lithuania	Austria	1109
Lithuania	China	5508
Lithuania	Estonia	32666
Lithuania	Estonia	12191
Lithuania	Germany	8496
Lithuania	Germany	1490
Lithuania	Italy	1210920
Lithuania	Latvia	131403
Lithuania	Poland	26167
Lithuania	Thailand	1342
Lithuania	United Kingdom	3206
Lithuania	USA	7303
Luxembourg	Australia	199.051
Luxembourg	Belgium	450461
Luxembourg	Belgium	7156.4
Luxembourg	China	3484.3
Luxembourg	France	2338.78
Luxembourg	France	12149.6
Luxembourg	Germany	105991
Luxembourg	Germany	7060.97
Luxembourg	Greece	4076.24
Luxembourg	India	90.977
Luxembourg	Italy	153.598
Luxembourg	Japan	1562.08
Luxembourg	Other Europe, nes	248745
Luxembourg	Other Europe, nes	2573.68
Luxembourg	Spain	362.148
Luxembourg	Switzerland	2.46741e+06
Luxembourg	USA	489.445
Luxembourg	USA	857.157
Madagascar	China	35854.9
Malawi	China	194.479
Malaysia	Australia	18795.2
Malaysia	Austria	5278.39
Malaysia	China	1.2987e+08
Malaysia	China, Hong Kong SAR	554081
Malaysia	China, Hong Kong SAR	568748
Malaysia	France	9482.47
Malaysia	Germany	1.09631e+06
Malaysia	Japan	3.92956e+07
Malaysia	Other Asia, nes	2.42795e+07
Malaysia	Singapore	2.42412e+06
Malaysia	Switzerland	5.71283e+06
Malaysia	Switzerland	65402.4
Malaysia	Thailand	94231.7
Malaysia	Thailand	370289
Malaysia	United Kingdom	24879.2
Malaysia	USA	817992
Malaysia	USA	2682.44
Maldives	Mauritius	98.318
Maldives	Thailand	0.934
Mali	China	50374.3
Mali	India	7217.27
Malta	Austria	93373.4
Malta	Netherlands	491.215
Malta	Thailand	4095.03
Malta	USA	263.32
Malta	USA	505.385
Mauritania	Canada	195.07
Mauritania	United Arab Emirates	5062.67
Mauritius	China	213.074
Mauritius	France	33442.7
Mauritius	Germany	13879
Mauritius	Italy	65896.9
Mauritius	Japan	1059.22
Mauritius	South Africa	3406.41
Mauritius	USA	5252.3
Mauritius	USA	5524.12
Mexico	China	168542
Mexico	China, Hong Kong SAR	27473
Mexico	Germany	543146
Mexico	Italy	41468
Mexico	Italy	11649
Mexico	Japan	181754
Mexico	Spain	256857
Mexico	Switzerland	1640
Mexico	United Kingdom	1809726
Mexico	USA	14773614
Mexico	USA	342218
Mongolia	China	21.17
Mongolia	Japan	9898.95
Montenegro	China	2981.22
Montenegro	Slovenia	197.848
Montenegro	Viet Nam	242.034
Morocco	China	72.554
Morocco	France	47073.1
Morocco	Germany	371.72
Morocco	Italy	57226.5
Morocco	Malaysia	2459.17
Morocco	United Kingdom	799.373
Mozambique	China	26.642
Mozambique	France	1785.73
Mozambique	Italy	271.404
Myanmar	China	17578
Myanmar	China	109.74
Myanmar	Rep. of Korea	34680
Namibia	South Africa	2491.42
Namibia	South Africa	1384.29
Nepal	China	5455.17
Nepal	China, Hong Kong SAR	228.43
Nepal	France	37.92
Nepal	India	676.94
Nepal	India	350.12
Netherlands	Austria	175569
Netherlands	Austria	260.946
Netherlands	Belgium	21681
Netherlands	Belgium	38147.7
Netherlands	Bulgaria	923.348
Netherlands	Bulgaria	44.869
Netherlands	Canada	1181.93
Netherlands	China	19693.8
Netherlands	China, Hong Kong SAR	129.883
Netherlands	China, Hong Kong SAR	46689.3
Netherlands	Croatia	242.054
Netherlands	Croatia	85.014
Netherlands	Cyprus	74.387
Netherlands	Cyprus	24.796
Netherlands	Czechia	956.409
Netherlands	Czechia	12.988
Netherlands	Denmark	40681.6
Netherlands	Denmark	42750.3
Netherlands	Estonia	101.545
Netherlands	Estonia	37.784
Netherlands	Finland	1344.88
Netherlands	Finland	87.376
Netherlands	France	84840.5
Netherlands	France	25807.7
Netherlands	Germany	1.32472e+07
Netherlands	Germany	30159.9
Netherlands	Greece	494.735
Netherlands	Greece	56.676
Netherlands	Hungary	2526.81
Netherlands	Hungary	25.977
Netherlands	India	1259.86
Netherlands	Ireland	336172
Netherlands	Ireland	12.988
Netherlands	Israel	442.782
Netherlands	Israel	1333.07
Netherlands	Italy	59052.9
Netherlands	Italy	768.669
Netherlands	Japan	1296.46
Netherlands	Latvia	255.042
Netherlands	Latvia	86.195
Netherlands	Lithuania	389.648
Netherlands	Lithuania	18.892
Netherlands	Luxembourg	599.822
Netherlands	Luxembourg	2.362
Netherlands	Malaysia	1716.81
Netherlands	Malta	9.446
Netherlands	Malta	2.362
Netherlands	Poland	7186.05
Netherlands	Poland	75.568
Netherlands	Portugal	872.575
Netherlands	Portugal	22.434
Netherlands	Romania	406.179
Netherlands	Romania	48.411
Netherlands	Singapore	625.798
Netherlands	Slovakia	278.657
Netherlands	Slovakia	18.892
Netherlands	Slovenia	388.467
Netherlands	Slovenia	1.181
Netherlands	Spain	6993.59
Netherlands	Spain	4413.65
Netherlands	Sweden	23390.7
Netherlands	Sweden	9.446
Netherlands	Switzerland	722553
Netherlands	Switzerland	1243.33
Netherlands	Thailand	262.127
Netherlands	Thailand	1276.39
Netherlands	Tunisia	1496.01
Netherlands	United Kingdom	1.57769e+06
Netherlands	United Kingdom	119.256
Netherlands	USA	5.37972e+07
Netherlands	USA	13536.1
New Zealand	Australia	32569.6
New Zealand	Australia	11910.4
New Zealand	China	230084
New Zealand	China, Hong Kong SAR	47996.4
New Zealand	France	5988.67
New Zealand	Germany	232065
New Zealand	India	43.506
New Zealand	Italy	46710.5
New Zealand	Japan	2.04875e+06
New Zealand	Japan	39820.7
New Zealand	New Zealand	6456.88
New Zealand	Other Asia, nes	5985.91
New Zealand	Spain	17.955
New Zealand	Switzerland	46382.5
New Zealand	Thailand	7783.48
New Zealand	Thailand	5771.83
New Zealand	United Kingdom	11027.1
New Zealand	United Kingdom	75.273
New Zealand	USA	598159
New Zealand	USA	7378.8
Nicaragua	Guatemala	32.56
Nicaragua	USA	5.57
Niger	Nigeria	35.989
Niger	Nigeria	287.915
Nigeria	Kenya	519.554
Nigeria	Netherlands	705.101
Nigeria	Singapore	10063.8
Nigeria	USA	54.047
Nigeria	USA	42.286
North Macedonia	Belgium	3.99171e+06
North Macedonia	China	1703.47
North Macedonia	Germany	276.57
North Macedonia	Italy	4.50419e+07
North Macedonia	Italy	1013.58
North Macedonia	Japan	1.63838e+06
North Macedonia	Rep. of Korea	1.55147e+06
North Macedonia	South Africa	2.93798e+08
North Macedonia	Thailand	42.21
North Macedonia	United Kingdom	7.28213e+08
North Macedonia	USA	1.48763e+06
North Macedonia	Viet Nam	305.06
Norway	Australia	624.562
Norway	Belgium	12135.9
Norway	Belgium	148.693
Norway	China	55639.5
Norway	China, Hong Kong SAR	6558.39
Norway	Czechia	438.572
Norway	Denmark	52960
Norway	Denmark	2836.87
Norway	Fiji	28152.9
Norway	Finland	5264.34
Norway	France	2450.12
Norway	France	1977.82
Norway	French Polynesia	30355.7
Norway	Germany	1.93296e+06
Norway	Germany	55726.8
Norway	Hungary	934.504
Norway	India	1651.75
Norway	India	674.783
Norway	Indonesia	4570.97
Norway	Italy	25384.7
Norway	Italy	267.599
Norway	Japan	3531.84
Norway	Philippines	1680.8
Norway	South Africa	5.0652e+06
Norway	Spain	7867.83
Norway	Sri Lanka	1244.69
Norway	Sweden	857542
Norway	Sweden	53792.4
Norway	Switzerland	13978.2
Norway	Thailand	362.502
Norway	Türkiye	554.523
Norway	United Kingdom	5.36253e+06
Norway	United Kingdom	8125.58
Norway	USA	173543
Norway	USA	2736.92
Oman	China	13.004
Oman	India	79074.1
Oman	United Arab Emirates	587.776
Oman	United Arab Emirates	131800
Other Asia, nes	Areas, nes	9912.25
Other Asia, nes	Areas, nes	3281.98
Other Asia, nes	Australia	31560.1
Other Asia, nes	Australia	26454.8
Other Asia, nes	Belgium	99.45
Other Asia, nes	China	749287
Other Asia, nes	China	471247
Other Asia, nes	China, Hong Kong SAR	4.36298e+06
Other Asia, nes	China, Hong Kong SAR	96404.1
Other Asia, nes	Czechia	5768.33
Other Asia, nes	France	121533
Other Asia, nes	French Polynesia	1392.35
Other Asia, nes	Germany	8.83968e+06
Other Asia, nes	Germany	3381.43
Other Asia, nes	Italy	81088.2
Other Asia, nes	Italy	11370.9
Other Asia, nes	Japan	6.72624e+07
Other Asia, nes	Japan	204246
Other Asia, nes	Malaysia	26686.8
Other Asia, nes	Netherlands	3845.55
Other Asia, nes	Rep. of Korea	966859
Other Asia, nes	Russian Federation	8.92461e+06
Other Asia, nes	Singapore	912259
Other Asia, nes	South Africa	1.31384e+08
Other Asia, nes	Switzerland	101476
Other Asia, nes	Thailand	60302.3
Other Asia, nes	United Kingdom	1.08504e+07
Other Asia, nes	USA	6.66426e+07
Other Asia, nes	USA	15349
Other Asia, nes	Viet Nam	1823.32
Pakistan	China	4152.35
Pakistan	Hungary	1240.26
Pakistan	Switzerland	278.97
Pakistan	United Arab Emirates	8.41
Pakistan	United Kingdom	6503.02
Palau	Other Asia, nes	91.44
Panama	Spain	3892
Panama	USA	8090
Paraguay	China	1881
Paraguay	USA	651
Peru	Brazil	30130.1
Peru	China	5852.26
Peru	Czechia	12439.1
Peru	India	379.45
Peru	Japan	9985
Peru	Madagascar	0.3
Peru	Philippines	4146.4
Peru	Spain	2488.02
Peru	Spain	1948.75
Peru	USA	276
Peru	USA	3543.6
Philippines	Australia	7032
Philippines	China	3389
Philippines	Germany	6534
Philippines	Japan	149569
Philippines	Japan	69
Philippines	Netherlands	994
Philippines	Rep. of Korea	371
Philippines	Singapore	454
Philippines	United Kingdom	6315
Philippines	USA	71396
Philippines	Viet Nam	9869
Poland	Austria	365
Poland	Belgium	2720
Poland	China	840
Poland	China	610751
Poland	China, Hong Kong SAR	116623
Poland	Czechia	487962
Poland	Germany	25948648
Poland	Germany	71
Poland	Ireland	3161395
Poland	Italy	175978705
Poland	Italy	939
Poland	Mexico	109
Poland	Philippines	207
Poland	Russian Federation	34079
Poland	Saint Helena	3371
Poland	Spain	9130
Poland	Sweden	12516
Poland	Switzerland	10078
Poland	Thailand	5884
Poland	United Kingdom	722091
Poland	USA	777472
Poland	USA	127
Poland	Viet Nam	23171
Portugal	Austria	32802.2
Portugal	China	757.872
Portugal	Czechia	8405.06
Portugal	France	4688.89
Portugal	Germany	7.51482e+06
Portugal	Germany	8694.28
Portugal	Italy	6.69003e+06
Portugal	Italy	229.014
Portugal	Spain	48800.1
Portugal	Spain	23352.4
Portugal	Switzerland	780.301
Portugal	Switzerland	761.413
Portugal	United Kingdom	79176.3
Portugal	USA	11689.2
Portugal	USA	857.033
Qatar	China	2.42663e+06
Qatar	China, Hong Kong SAR	166199
Qatar	France	189339
Qatar	Germany	24148.2
Qatar	Germany	58184.2
Qatar	India	111607
Qatar	Italy	15704
Qatar	Lebanon	19238.2
Qatar	Rep. of Korea	28611.6
Qatar	Spain	52047.8
Qatar	Switzerland	2.71204e+06
Qatar	United Kingdom	87454.5
Qatar	USA	381759
Rep. of Korea	Andorra	310
Rep. of Korea	Argentina	967
Rep. of Korea	Australia	8150
Rep. of Korea	Belgium	12615776
Rep. of Korea	China	139780
Rep. of Korea	China	721870
Rep. of Korea	China, Hong Kong SAR	8849
Rep. of Korea	China, Hong Kong SAR	4466
Rep. of Korea	Denmark	1
Rep. of Korea	France	236
Rep. of Korea	France	11173
Rep. of Korea	Germany	59768446
Rep. of Korea	Greece	53944
Rep. of Korea	India	1219708
Rep. of Korea	Italy	4518794
Rep. of Korea	Italy	12
Rep. of Korea	Japan	65385250
Rep. of Korea	Japan	62599
Rep. of Korea	Lithuania	588
Rep. of Korea	Lithuania	428
Rep. of Korea	Norway	56520069
Rep. of Korea	Other Asia, nes	10
Rep. of Korea	Philippines	811
Rep. of Korea	Portugal	143
Rep. of Korea	Russian Federation	260004674
Rep. of Korea	Singapore	200
Rep. of Korea	South Africa	141223781
Rep. of Korea	Spain	1184
Rep. of Korea	Switzerland	2819640
Rep. of Korea	Thailand	844
Rep. of Korea	United Kingdom	44623590
Rep. of Korea	United Kingdom	1678
Rep. of Korea	USA	17161457
Rep. of Korea	USA	37093
Rep. of Moldova	China	490
Rep. of Moldova	China	18
Rep. of Moldova	Russian Federation	10527
Rep. of Moldova	Spain	352
Russian Federation	Belarus	1405524
Russian Federation	Belarus	5
Russian Federation	Belgium	3.00027e+06
Russian Federation	China	125741
Russian Federation	China, Hong Kong SAR	1819.46
Russian Federation	Colombia	119641
Russian Federation	Czechia	983.43
Russian Federation	France	30809.3
Russian Federation	Germany	3238.69
Russian Federation	Germany	19303.9
Russian Federation	Italy	1.03174e+06
Russian Federation	Italy	149325
Russian Federation	Japan	33477.5
Russian Federation	Kazakhstan	166085
Russian Federation	Rep. of Korea	901.06
Russian Federation	South Africa	5.09425e+06
Russian Federation	Spain	139971
Russian Federation	Switzerland	377559
Russian Federation	Türkiye	7161
Russian Federation	Ukraine	84089.9
Russian Federation	United Arab Emirates	767252
Russian Federation	United Kingdom	6.33948e+06
Russian Federation	USA	928532
Russian Federation	USA	31090.3
Russian Federation	Uzbekistan	583414
Russian Federation	Viet Nam	1641.4
Rwanda	China	3119.09
Rwanda	Kenya	288.145
Rwanda	Portugal	751.951
Rwanda	Sweden	7.874
Rwanda	United Arab Emirates	7.409
Saint Lucia	Canada	206.84
Saint Lucia	China	59.37
Saint Lucia	USA	1082.2
Samoa	Australia	310.569
Samoa	USA	5963.78
Saudi Arabia	Australia	28346.1
Saudi Arabia	China	44353.6
Saudi Arabia	France	3304.53
Saudi Arabia	Germany	261510
Saudi Arabia	Kuwait	24000
Saudi Arabia	Switzerland	73751.5
Saudi Arabia	Thailand	3764.27
Saudi Arabia	Türkiye	6253.6
Saudi Arabia	United Kingdom	6017.33
Saudi Arabia	USA	161764
Saudi Arabia	USA	7064.53
Senegal	China	32751.6
Senegal	India	1439.12
Senegal	United Arab Emirates	929.799
Serbia	Austria	486
Serbia	China	8054
Serbia	Croatia	12
Serbia	Germany	1056498
Serbia	Israel	14350
Serbia	Italy	3817
Serbia	Nepal	13
Serbia	Slovenia	209
Serbia	Switzerland	2662
Serbia	United Kingdom	2827
Serbia	Viet Nam	1618
Seychelles	China, Hong Kong SAR	16400.6
Seychelles	Italy	16.416
Seychelles	USA	6352.11
Sierra Leone	China	1041.91
Singapore	Australia	141738
Singapore	Australia	58476.1
Singapore	Bahrain	1548.85
Singapore	Canada	232696
Singapore	China	964024
Singapore	China	18283.2
Singapore	China, Hong Kong SAR	2.06184e+06
Singapore	China, Hong Kong SAR	363465
Singapore	Czechia	8110.88
Singapore	France	14705.5
Singapore	France	37037.5
Singapore	French Polynesia	7303.49
Singapore	Germany	1.77755e+07
Singapore	Germany	43413.6
Singapore	India	84051.7
Singapore	India	638.5
Singapore	Indonesia	1.481
Singapore	Indonesia	3499.16
Singapore	Italy	4665.05
Singapore	Japan	7.84224e+07
Singapore	Japan	169099
Singapore	Malaysia	3439.9
Singapore	Malaysia	2694.74
Singapore	Netherlands	3400.64
Singapore	Other Asia, nes	2.22693e+07
Singapore	Rep. of Korea	3.73116e+06
Singapore	South Africa	4.9805e+06
Singapore	Spain	48432.7
Singapore	Switzerland	3.28633e+06
Singapore	Thailand	15307
Singapore	Türkiye	860.716
Singapore	United Arab Emirates	51.11
Singapore	United Kingdom	2.44798e+06
Singapore	United Kingdom	791.089
Singapore	USA	2.54529e+07
Singapore	USA	21681.6
Singapore	Viet Nam	14.074
Slovakia	Austria	29269.9
Slovakia	China	17891.5
Slovakia	Czechia	175816
Slovakia	Czechia	34913.7
Slovakia	French Polynesia	1087.66
Slovakia	Germany	5.28769e+07
Slovakia	Germany	3385.8
Slovakia	Hungary	7654.94
Slovakia	Italy	227079
Slovakia	Japan	224.381
Slovakia	Other Asia, nes	714.477
Slovakia	Other Europe, nes	1.9821e+07
Slovakia	Other Europe, nes	892.801
Slovakia	Panama	2294.59
Slovakia	Poland	49394.6
Slovakia	Switzerland	4148.69
Slovakia	Thailand	16461.3
Slovakia	United Kingdom	7987.97
Slovakia	USA	8283.21
Slovakia	USA	2219.01
Slovakia	Viet Nam	3292.5
Slovenia	Australia	1684.72
Slovenia	Austria	1.22964e+06
Slovenia	Canada	3190.7
Slovenia	China	559.22
Slovenia	China	41034.6
Slovenia	China, Hong Kong SAR	3846.85
Slovenia	Czechia	44105.7
Slovenia	France	542.36
Slovenia	Germany	70075.2
Slovenia	Germany	2433.86
Slovenia	Italy	4140.55
Slovenia	Italy	23049.8
Slovenia	Switzerland	34280.5
Slovenia	United Kingdom	1858.47
Slovenia	USA	1592.82
Slovenia	Viet Nam	152.24
Solomon Isds	China	13.007
South Africa	Areas, nes	1648.46
South Africa	Belgium	2.6547e+06
South Africa	Canada	1.68796e+06
South Africa	China	969.536
South Africa	China	87143.7
South Africa	China, Hong Kong SAR	253.946
South Africa	Czechia	28975.6
South Africa	Dem. Rep. of the Congo	326.071
South Africa	Denmark	42.173
South Africa	Germany	3.52235e+07
South Africa	India	18.031
South Africa	Italy	1.52615e+06
South Africa	Italy	46.172
South Africa	Japan	1.11695e+07
South Africa	Mali	41.796
South Africa	Namibia	242.177
South Africa	Norway	684.583
South Africa	Other Asia, nes	7667.65
South Africa	Russian Federation	2.50356e+07
South Africa	South Africa	3.30239e+07
South Africa	Switzerland	319573
South Africa	Switzerland	56.734
South Africa	Thailand	976.402
South Africa	United Kingdom	5.38671e+06
South Africa	USA	1.34306e+07
South Africa	USA	1454.87
Spain	Austria	3612.77
Spain	Belgium	6968.7
Spain	Bulgaria	179.858
Spain	China	287.663
Spain	China	345136
Spain	China, Hong Kong SAR	7084.65
Spain	Czechia	91624.3
Spain	Czechia	1878.68
Spain	France	150702
Spain	France	52403.2
Spain	French Polynesia	2067.74
Spain	Germany	3.20311e+06
Spain	Germany	31530
Spain	Greece	3259.22
Spain	India	111.658
Spain	Italy	1.95618e+07
Spain	Italy	102578
Spain	Japan	266.88
Spain	Netherlands	744.101
Spain	Other Europe, nes	26311.7
Spain	Poland	22472.4
Spain	Portugal	513965
Spain	Portugal	19495.6
Spain	Romania	73.73
Spain	Slovakia	297.139
Spain	Switzerland	356498
Spain	Switzerland	1987.51
Spain	Thailand	332.575
Spain	United Kingdom	2.70091e+06
Spain	United Kingdom	387.127
Spain	USA	132204
Spain	USA	22690.4
Spain	Venezuela	4986.34
State of Palestine	Israel	3068.85
State of Palestine	United Kingdom	11709.1
Sweden	Austria	1.2052e+06
Sweden	Belgium	11632.7
Sweden	China	361652
Sweden	China, Hong Kong SAR	31788.5
Sweden	Denmark	139132
Sweden	Denmark	1842.81
Sweden	Finland	2303.51
Sweden	France	739313
Sweden	Germany	3.47842e+06
Sweden	Germany	2418.69
Sweden	India	115.176
Sweden	Italy	1.15579e+06
Sweden	Japan	10481
Sweden	Japan	3455.27
Sweden	Netherlands	230.351
Sweden	Norway	3.33019e+06
Sweden	Philippines	691.054
Sweden	Poland	1382.11
Sweden	Rep. of Korea	115.176
Sweden	Spain	1151.76
Sweden	Switzerland	359348
Sweden	Thailand	921.406
Sweden	United Kingdom	4.89382e+06
Sweden	USA	63231.5
Sweden	USA	5067.73
Sweden	Viet Nam	230.351
Switzerland	Australia	9.34354e+06
Switzerland	Australia	21364.1
Switzerland	Austria	308867
Switzerland	Austria	17614.9
Switzerland	Belarus	2.20202e+06
Switzerland	Belgium	8.63198e+06
Switzerland	Belgium	2531.18
Switzerland	Brazil	4.87306e+07
Switzerland	Canada	6.75842e+06
Switzerland	Canada	61.362
Switzerland	China	7129.22
Switzerland	China	907087
Switzerland	China, Hong Kong SAR	1.98111e+06
Switzerland	China, Hong Kong SAR	2.46864e+06
Switzerland	Colombia	1.18989e+06
Switzerland	Czechia	803888
Switzerland	Czechia	92.043
Switzerland	Denmark	266.924
Switzerland	Ecuador	336.467
Switzerland	Fiji	732.251
Switzerland	Finland	5276.09
Switzerland	France	3.83465e+07
Switzerland	France	736578
Switzerland	French Polynesia	2396.18
Switzerland	Germany	9.88796e+07
Switzerland	Germany	581892
Switzerland	Guatemala	48.067
Switzerland	Honduras	46.021
Switzerland	India	134.996
Switzerland	India	23695.9
Switzerland	Indonesia	17589.4
Switzerland	Ireland	902.019
Switzerland	Israel	24813.7
Switzerland	Italy	2.48077e+08
Switzerland	Italy	711195
Switzerland	Japan	2.199e+07
Switzerland	Japan	64182.4
Switzerland	Kuwait	152343
Switzerland	Latvia	111836
Switzerland	Lebanon	2.18805e+06
Switzerland	Lithuania	254032
Switzerland	Malaysia	3269.56
Switzerland	Nepal	18.409
Switzerland	Netherlands	1.47471e+06
Switzerland	Netherlands	4844.52
Switzerland	Norway	5.18059e+06
Switzerland	Other Asia, nes	4.55761e+06
Switzerland	Panama	42178.1
Switzerland	Peru	12797
Switzerland	Philippines	1999.37
Switzerland	Poland	77824.2
Switzerland	Poland	177.949
Switzerland	Rep. of Korea	4.60674e+06
Switzerland	Russian Federation	8.16122e+07
Switzerland	Russian Federation	243.402
Switzerland	Saudi Arabia	1.97687e+07
Switzerland	Serbia	448233
Switzerland	Singapore	1.14693e+06
Switzerland	South Africa	2.35387e+08
Switzerland	Spain	74540.3
Switzerland	Thailand	161152
Switzerland	Thailand	29220.5
Switzerland	Türkiye	6.50776e+06
Switzerland	Türkiye	10380.4
Switzerland	Ukraine	1.19449e+06
Switzerland	United Arab Emirates	104825
Switzerland	United Arab Emirates	51260.6
Switzerland	United Kingdom	4.69695e+07
Switzerland	United Kingdom	2.00989e+06
Switzerland	USA	3.55312e+08
Switzerland	USA	3.92445e+06
Thailand	Australia	117.02
Thailand	Belgium	29465.2
Thailand	China	47186.7
Thailand	China	91525.4
Thailand	China, Hong Kong SAR	3.74012e+06
Thailand	China, Hong Kong SAR	48498.1
Thailand	Czechia	61903.2
Thailand	Denmark	1596.54
Thailand	France	45154.1
Thailand	France	166098
Thailand	French Polynesia	13431
Thailand	Germany	5.30103e+06
Thailand	Italy	1.67703e+06
Thailand	Italy	6089.61
Thailand	Japan	3.72162e+07
Thailand	Japan	144295
Thailand	New Zealand	551223
Thailand	Rep. of Korea	2974.62
Thailand	Rep. of Korea	64.57
Thailand	Russian Federation	662452
Thailand	South Africa	4.53936e+06
Thailand	Spain	181479
Thailand	Switzerland	99873.5
Thailand	Thailand	13594.6
Thailand	Thailand	34539.2
Thailand	United Arab Emirates	14338.4
Thailand	United Arab Emirates	1850000
Thailand	United Kingdom	354409
Thailand	United Kingdom	11051.1
Thailand	USA	5.92344e+06
Thailand	USA	17503.9
Trinidad and Tobago	China	2451.15
Trinidad and Tobago	USA	664.037
Türkiye	Austria	597190
Türkiye	Bulgaria	2485
Türkiye	China	5914
Türkiye	China	49168
Türkiye	Czechia	778
Türkiye	France	45929
Türkiye	Germany	452192
Türkiye	Italy	290783
Türkiye	Italy	2060
Türkiye	Japan	1082785
Türkiye	Netherlands	826
Türkiye	Switzerland	862748
Türkiye	United Kingdom	977415
Türkiye	USA	326833
Türkiye	USA	7913
Uganda	Belgium	6674.52
Uganda	China	248
Uganda	China, Hong Kong SAR	937
Uganda	France	59
Uganda	South Africa	4.61
Uganda	United Arab Emirates	151.5
Ukraine	Austria	214.91
Ukraine	China	3502.06
Ukraine	Czechia	171357
Ukraine	Czechia	168.31
Ukraine	France	14830.4
Ukraine	Germany	1.35889e+06
Ukraine	India	101.87
Ukraine	Italy	2414.31
Ukraine	Italy	433.4
Ukraine	Poland	4145.01
Ukraine	Russian Federation	129797
Ukraine	Spain	2245.48
Ukraine	United Kingdom	10867.4
Ukraine	USA	5932.36
United Arab Emirates	Australia	3876.52
United Arab Emirates	Australia	6843.3
United Arab Emirates	Belgium	704800
United Arab Emirates	Canada	2939.7
United Arab Emirates	Canada	320.49
United Arab Emirates	China	45189.9
United Arab Emirates	China, Hong Kong SAR	194689
United Arab Emirates	Germany	95184.7
United Arab Emirates	Germany	1056.34
United Arab Emirates	India	34184.9
United Arab Emirates	Indonesia	167708
United Arab Emirates	Indonesia	816.882
United Arab Emirates	Italy	318418
United Arab Emirates	Italy	6759.25
United Arab Emirates	Japan	51966.7
United Arab Emirates	Lebanon	428.863
United Arab Emirates	Mauritius	395.134
United Arab Emirates	Morocco	490.129
United Arab Emirates	Netherlands	1244.22
United Arab Emirates	Oman	364.057
United Arab Emirates	Philippines	1089.18
United Arab Emirates	Russian Federation	1.28928e+06
United Arab Emirates	Saudi Arabia	3010.48
United Arab Emirates	Singapore	5967.97
United Arab Emirates	Singapore	12253.2
United Arab Emirates	South Africa	9.26972e+06
United Arab Emirates	Spain	243.093
United Arab Emirates	Switzerland	3.1484e+07
United Arab Emirates	Switzerland	326.29
United Arab Emirates	Thailand	75.42
United Arab Emirates	Thailand	3721.99
United Arab Emirates	Türkiye	607.488
United Arab Emirates	Uganda	232504
United Arab Emirates	United Kingdom	3.28666e+07
United Arab Emirates	United Kingdom	1663.72
United Arab Emirates	USA	53859.3
United Arab Emirates	USA	160819
United Arab Emirates	Yemen	4101.29
United Kingdom	Australia	70755.5
United Kingdom	Australia	81253.4
United Kingdom	Austria	430203
United Kingdom	Austria	360.385
United Kingdom	Belgium	1.32726e+08
United Kingdom	Belgium	177.523
United Kingdom	Canada	3573.15
United Kingdom	China	22629.5
United Kingdom	China	1.02383e+06
United Kingdom	China, Hong Kong SAR	7.52898e+06
United Kingdom	China, Hong Kong SAR	208782
United Kingdom	Czechia	1061.13
United Kingdom	Denmark	1268.02
United Kingdom	Egypt	2.32854e+06
United Kingdom	France	584394
United Kingdom	France	321662
United Kingdom	Germany	1.38138e+08
United Kingdom	Germany	107858
United Kingdom	India	3.28721e+07
United Kingdom	India	14618.3
United Kingdom	Indonesia	2203.68
United Kingdom	Ireland	2.54213e+07
United Kingdom	Ireland	6195.95
United Kingdom	Italy	2.51004e+08
United Kingdom	Italy	55999.8
United Kingdom	Japan	3.99902e+08
United Kingdom	Japan	800922
United Kingdom	Kazakhstan	1.89466e+06
United Kingdom	Lithuania	6708.49
United Kingdom	Malta	176.188
United Kingdom	Mauritius	2039.51
United Kingdom	Mexico	1.712e+06
United Kingdom	Netherlands	2624.13
United Kingdom	Norway	6.57117e+07
United Kingdom	Other Asia, nes	1.09255e+06
United Kingdom	Philippines	2038.17
United Kingdom	Poland	425.788
United Kingdom	Rep. of Korea	2.92761e+07
United Kingdom	Russian Federation	4.51477e+08
United Kingdom	Saudi Arabia	2.44894e+07
United Kingdom	Serbia	753511
United Kingdom	Singapore	1.21108e+06
United Kingdom	South Africa	1.64304e+09
United Kingdom	South Africa	140726
United Kingdom	Spain	9.1802e+06
United Kingdom	Spain	12716.2
United Kingdom	Switzerland	4.14882e+08
United Kingdom	Switzerland	39083
United Kingdom	Thailand	565351
United Kingdom	Thailand	10743.5
United Kingdom	Türkiye	33615.9
United Kingdom	Ukraine	7564.07
United Kingdom	United Arab Emirates	59108.4
United Kingdom	United Kingdom	1.60869e+06
United Kingdom	United Kingdom	15779.5
United Kingdom	USA	1.92663e+08
United Kingdom	USA	768963
United Kingdom	Viet Nam	32622.8
United Rep. of Tanzania	China	166.357
United Rep. of Tanzania	South Africa	1612.11
United Rep. of Tanzania	Switzerland	3541.13
United Rep. of Tanzania	United Arab Emirates	10.008
Uruguay	China	2653.9
Uruguay	Netherlands	3430.36
Uruguay	Spain	300.23
Uruguay	USA	198802
Uruguay	USA	1656.38
USA	Argentina	335539
USA	Australia	22630
USA	Australia	533141
USA	Austria	6021018
USA	Austria	12596
USA	Bahamas	2449
USA	Belgium	136237534
USA	Brazil	41344
USA	Brazil	4650
USA	Canada	262261236
USA	Canada	1284989
USA	Cayman Isds	96309
USA	China	566368
USA	China	16435851
USA	China, Hong Kong SAR	367956
USA	China, Hong Kong SAR	594814
USA	Colombia	7530212
USA	Cook Isds	3260
USA	Costa Rica	248151
USA	Czechia	7062438
USA	Denmark	9825
USA	Dominican Rep.	295881
USA	Egypt	4598
USA	Eswatini	10165
USA	Ethiopia	5938
USA	Fiji	16169
USA	France	6865202
USA	France	153235
USA	French Polynesia	329355
USA	Georgia	13500
USA	Germany	1217479574
USA	Germany	50981
USA	India	2907680
USA	India	27818
USA	Indonesia	63777
USA	Ireland	66343
USA	Ireland	2256
USA	Israel	15185
USA	Israel	74504
USA	Italy	247055088
USA	Italy	317858
USA	Japan	39592137
USA	Japan	1147527
USA	Kenya	15267
USA	Lithuania	13825
USA	Mexico	2633100
USA	Netherlands	159013
USA	Norway	117515809
USA	Oman	5944
USA	Other Asia, nes	4768663
USA	Other Asia, nes	7106
USA	Panama	4124
USA	Philippines	43799
USA	Portugal	9986
USA	Portugal	4116
USA	Rep. of Korea	21330165
USA	Rep. of Korea	3597
USA	Russian Federation	1269814139
USA	Seychelles	3245
USA	Singapore	31030338
USA	South Africa	2160659037
USA	Spain	30115
USA	Sweden	5120
USA	Switzerland	141941139
USA	Switzerland	99142
USA	Thailand	6670
USA	Thailand	432206
USA	Türkiye	5689
USA	United Kingdom	310820434
USA	United Kingdom	79897
USA	Uruguay	182050
USA	Venezuela	67011
USA	Viet Nam	80770
Viet Nam	Australia	48500
Viet Nam	China	317755
Viet Nam	France	65862.7
Viet Nam	France	36027.5
Viet Nam	Germany	2157.65
Viet Nam	India	785.1
Viet Nam	Italy	155401
Viet Nam	Italy	1193.63
Viet Nam	Japan	7.13934e+06
Viet Nam	Japan	270086
Viet Nam	Portugal	948.92
Viet Nam	Rep. of Korea	81325.8
Viet Nam	Thailand	7697.5
Viet Nam	USA	1.38479e+06
Zambia	China	59.992
Zambia	South Africa	6110.63
Zambia	South Africa	426.172
Zambia	USA	421563
Zimbabwe	South Africa	24335.9
Zimbabwe	USA	11480

## Sheet: 2019
source	target	weight
Andorra	China	2851.19
Andorra	France	16043.2
Andorra	Germany	3020.7
Andorra	Netherlands	295.121
Andorra	Spain	8331.68
Andorra	Spain	103236
Andorra	Switzerland	33.575
Angola	China	45.169
Angola	Germany	833.928
Angola	Portugal	1089.41
Antigua and Barbuda	China	2790.39
Antigua and Barbuda	USA	269.304
Argentina	Austria	48790.8
Argentina	Belgium	1.34559e+06
Argentina	China	8959.09
Argentina	Czechia	81685.5
Argentina	Germany	6.4509e+06
Argentina	South Africa	2.65321e+06
Argentina	United Kingdom	1.1314e+08
Argentina	USA	1.37068e+06
Armenia	China	2098.83
Armenia	China, Hong Kong SAR	2101.71
Armenia	Czechia	937.53
Armenia	Russian Federation	32369.5
Aruba	Areas, nes	34264.2
Aruba	Netherlands	116.76
Aruba	Panama	50.279
Aruba	Spain	15914.5
Aruba	Switzerland	7686.59
Aruba	USA	10057.5
Aruba	USA	576746
Australia	Australia	28599
Australia	Australia	31441.3
Australia	Austria	249154
Australia	Canada	5100.07
Australia	Canada	1361.83
Australia	China	921.977
Australia	China	1.65188e+06
Australia	China, Hong Kong SAR	646993
Australia	China, Hong Kong SAR	60239.4
Australia	Czechia	1991.48
Australia	France	2547.51
Australia	France	155062
Australia	Germany	5.81931e+06
Australia	Germany	24494
Australia	Greece	1352.15
Australia	India	1000.44
Australia	Indonesia	2314.77
Australia	Italy	523385
Australia	Italy	5950.18
Australia	Japan	170157
Australia	Japan	25056.9
Australia	New Zealand	1.31345e+06
Australia	New Zealand	10081.3
Australia	Norway	226315
Australia	Philippines	13478.3
Australia	Rep. of Korea	1412.91
Australia	Russian Federation	203249
Australia	South Africa	384776
Australia	South Africa	3342.28
Australia	Spain	4505.82
Australia	Spain	7644.37
Australia	Switzerland	8.0655e+06
Australia	Thailand	204611
Australia	Thailand	1861.65
Australia	United Kingdom	2.78074e+07
Australia	United Kingdom	11281.4
Australia	USA	9.18294e+06
Australia	USA	218645
Australia	Viet Nam	3140.07
Austria	Australia	657.262
Austria	Belgium	651455
Austria	Belgium	1548.54
Austria	Bulgaria	1604.53
Austria	Canada	63.823
Austria	China	341153
Austria	China, Hong Kong SAR	7556.84
Austria	Croatia	114133
Austria	Czechia	207705
Austria	Czechia	5254.74
Austria	Denmark	9628.27
Austria	Finland	115.329
Austria	France	209154
Austria	France	39493.9
Austria	French Polynesia	1533.98
Austria	Germany	5.73854e+07
Austria	Germany	453789
Austria	Greece	53584.2
Austria	Hungary	37777.5
Austria	India	631.509
Austria	Indonesia	11.197
Austria	Ireland	15526.8
Austria	Israel	463.555
Austria	Italy	1.31762e+06
Austria	Italy	106521
Austria	Japan	1.11434e+07
Austria	Japan	19192.7
Austria	Lithuania	567344
Austria	Luxembourg	1112.98
Austria	Mexico	377.338
Austria	Netherlands	208008
Austria	Netherlands	113.089
Austria	Norway	676.297
Austria	Other Asia, nes	998.77
Austria	Poland	124407
Austria	Poland	2947.04
Austria	Portugal	37698
Austria	Rep. of Korea	14.556
Austria	Romania	1511.59
Austria	Russian Federation	95389.2
Austria	Serbia	333.67
Austria	Slovakia	740170
Austria	Slovakia	7770.7
Austria	Slovenia	47498.7
Austria	Slovenia	753.556
Austria	South Africa	486036
Austria	Spain	650.544
Austria	Sweden	954454
Austria	Sweden	1108.5
Austria	Switzerland	2.70898e+07
Austria	Switzerland	1134.25
Austria	Thailand	398836
Austria	Thailand	16724.9
Austria	United Kingdom	1.30083e+07
Austria	United Kingdom	6277.02
Austria	USA	45746.3
Austria	USA	22780.2
Azerbaijan	China	7855.65
Azerbaijan	Italy	5857.94
Azerbaijan	Spain	433.05
Azerbaijan	Türkiye	45.28
Bahamas	China	13821.9
Bahamas	USA	874.994
Bahamas	USA	31908.8
Bahrain	China	39090.8
Bahrain	India	4818.56
Bahrain	India	1476.67
Bahrain	Italy	1133.14
Bahrain	Italy	19.9
Bahrain	Lebanon	835.03
Bahrain	Portugal	3.8
Bahrain	Spain	58.88
Bahrain	Switzerland	352.07
Bahrain	Syria	732.38
Bahrain	Türkiye	1702.99
Bahrain	United Arab Emirates	3825.14
Bahrain	United Kingdom	68865.3
Bahrain	United Kingdom	2020
Bahrain	USA	276.67
Bahrain	USA	186.8
Bahrain	Viet Nam	16.96
Barbados	China	55464
Barbados	China, Hong Kong SAR	11011
Barbados	India	489
Barbados	Italy	4053
Barbados	Other Asia, nes	100
Barbados	Thailand	6767
Barbados	USA	4381
Barbados	USA	14693
Belgium	Australia	428.401
Belgium	Australia	2284.32
Belgium	Austria	90951.1
Belgium	Austria	215.577
Belgium	Azerbaijan	5479.75
Belgium	China	31546.2
Belgium	Czechia	502619
Belgium	Estonia	93647.9
Belgium	France	385233
Belgium	France	66056.1
Belgium	Germany	3.2866e+08
Belgium	Germany	5484.49
Belgium	Greece	42516.4
Belgium	Ireland	108.835
Belgium	Italy	643697
Belgium	Italy	1390.66
Belgium	Japan	60138.6
Belgium	Japan	34.793
Belgium	Latvia	118.44
Belgium	Luxembourg	33918.3
Belgium	Netherlands	914578
Belgium	Portugal	12326.9
Belgium	Rep. of Korea	716.464
Belgium	Romania	2825.74
Belgium	Saudi Arabia	18074.7
Belgium	Slovakia	1.18654e+06
Belgium	South Africa	505035
Belgium	Spain	24664.3
Belgium	Spain	107221
Belgium	Switzerland	3.1904e+06
Belgium	Switzerland	235.09
Belgium	Türkiye	10023.8
Belgium	United Arab Emirates	4.45564e+06
Belgium	United Kingdom	7.47316e+06
Belgium	USA	244315
Belgium	USA	6488.4
Belize	Other Asia, nes	252.86
Benin	France	2402.4
Bermuda	India	25.93
Bermuda	Russian Federation	100
Bermuda	USA	62764
Bolivia (Plurinational State of)	China	1570.25
Bolivia (Plurinational State of)	China	277.16
Bolivia (Plurinational State of)	Greece	91.1
Bolivia (Plurinational State of)	Japan	377.59
Bolivia (Plurinational State of)	Spain	272.12
Bolivia (Plurinational State of)	USA	42.1
Bosnia Herzegovina	Austria	4481.06
Bosnia Herzegovina	China	22164.5
Bosnia Herzegovina	Germany	10338.5
Bosnia Herzegovina	India	185.39
Bosnia Herzegovina	Japan	17.08
Bosnia Herzegovina	Slovenia	364.26
Bosnia Herzegovina	Viet Nam	98.81
Botswana	China	84.668
Botswana	India	1849.63
Botswana	South Africa	1062.17
Botswana	South Africa	2783.23
Brazil	Belgium	94954896
Brazil	China	6929
Brazil	China	80619
Brazil	China, Hong Kong SAR	3729
Brazil	Czechia	534877
Brazil	France	520
Brazil	Germany	40892714
Brazil	Germany	2233
Brazil	India	2844
Brazil	Italy	192817
Brazil	Japan	2903
Brazil	Norway	4575548
Brazil	Other Asia, nes	1287
Brazil	Peru	680663
Brazil	Philippines	20216
Brazil	Portugal	3383
Brazil	Rep. of Korea	782972
Brazil	Russian Federation	128592476
Brazil	South Africa	233247627
Brazil	Spain	4342
Brazil	Switzerland	398599
Brazil	United Kingdom	11415424
Brazil	USA	66952183
Brazil	USA	53605
Brunei Darussalam	Malaysia	8.75
Brunei Darussalam	USA	676.89
Bulgaria	Austria	442197
Bulgaria	China	4786.7
Bulgaria	China, Hong Kong SAR	537.388
Bulgaria	China, Hong Kong SAR	120889
Bulgaria	Germany	24256.9
Bulgaria	Italy	543.111
Bulgaria	Japan	3.83757e+06
Bulgaria	Romania	3680.45
Bulgaria	Switzerland	288.438
Bulgaria	Türkiye	595910
Bulgaria	United Kingdom	1.53127e+06
Bulgaria	USA	2382.48
Burkina Faso	China	13938.8
Burkina Faso	France	2366.73
Cambodia	China	151.71
Cameroon	China	18.49
Cameroon	France	111.68
Cameroon	Italy	90.57
Cameroon	Kenya	257.48
Canada	Australia	5171.63
Canada	Austria	48.234
Canada	Austria	55.017
Canada	Belgium	8.8679e+07
Canada	Brazil	36770.4
Canada	Brazil	195.952
Canada	Cambodia	1532.95
Canada	Canada	525991
Canada	Canada	2401.17
Canada	China	878.017
Canada	China	790948
Canada	China, Hong Kong SAR	144106
Canada	Czechia	664.73
Canada	Dominican Rep.	45.22
Canada	Eswatini	19669.8
Canada	France	72.352
Canada	France	589277
Canada	French Polynesia	23083.2
Canada	Germany	1.3157e+07
Canada	Germany	8271.44
Canada	Greece	50.495
Canada	India	1659.57
Canada	India	8435.74
Canada	Indonesia	347.438
Canada	Israel	91.947
Canada	Israel	1012.92
Canada	Italy	7.11449e+07
Canada	Italy	13260.7
Canada	Japan	319612
Canada	Japan	5755.72
Canada	Norway	1.24582e+06
Canada	Other Asia, nes	600533
Canada	Philippines	154.501
Canada	Poland	432458
Canada	Rep. of Korea	845.609
Canada	Russian Federation	1.02829e+08
Canada	Samoa	202.735
Canada	Slovenia	76.12
Canada	South Africa	2.29586e+08
Canada	Spain	1105.62
Canada	Spain	31586.7
Canada	Sweden	177647
Canada	Switzerland	2.92419e+07
Canada	Switzerland	122.847
Canada	Thailand	24086.3
Canada	Türkiye	4563.43
Canada	United Arab Emirates	750.648
Canada	United Kingdom	2.35392e+07
Canada	United Kingdom	1141.05
Canada	USA	1.11037e+08
Canada	USA	1.47928e+06
Canada	Viet Nam	24495.5
Chile	Areas, nes	10865.7
Chile	Austria	16508.9
Chile	Brazil	1537.2
Chile	China	61977.6
Chile	Germany	7177.32
Chile	Malaysia	299.55
Chile	Peru	49.3
Chile	South Africa	8126.08
Chile	Spain	55135.2
Chile	Thailand	20678.1
Chile	Türkiye	114.15
Chile	United Kingdom	337.22
Chile	USA	4269.07
Chile	USA	8407.2
China	Areas, nes	58394682
China	Australia	997768
China	Australia	80258
China	Austria	525699
China	Austria	91786
China	Belgium	99487970
China	Belgium	370
China	Canada	240050
China	Canada	588
China	China	55973
China	China	397105
China	China, Hong Kong SAR	193061319
China	China, Hong Kong SAR	150275
China	China, Macao SAR	6233
China	Colombia	912
China	Czechia	231
China	Denmark	4361
China	Fiji	76526
China	France	35092
China	France	588698
China	French Polynesia	29185
China	Georgia	281
China	Germany	214031265
China	Germany	329886
China	India	3304
China	Indonesia	6875
China	Ireland	161875
China	Italy	63151952
China	Italy	46640
China	Japan	310715858
China	Japan	2075892
China	Lebanon	784
China	Myanmar	400
China	Netherlands	13361
China	New Zealand	252
China	Norway	21914977
China	Other Asia, nes	33554868
China	Philippines	5778
China	Poland	106
China	Portugal	15833
China	Portugal	738
China	Rep. of Korea	9647397
China	Rep. of Korea	69117
China	Romania	1037
China	Russian Federation	500035448
China	Russian Federation	109
China	Singapore	6337
China	South Africa	1940186064
China	Spain	7216
China	Sweden	1886
China	Switzerland	14973869
China	Switzerland	122
China	Thailand	76000
China	Thailand	76135
China	Türkiye	62
China	Türkiye	904
China	United Arab Emirates	2148
China	United Kingdom	173438425
China	United Kingdom	56955
China	Uruguay	43
China	USA	33689468
China	USA	100899
China	Viet Nam	11813
China, Hong Kong SAR	Australia	484645
China, Hong Kong SAR	Australia	24648.6
China, Hong Kong SAR	Austria	1040.98
China, Hong Kong SAR	Bahrain	711.085
China, Hong Kong SAR	Belgium	1.58823e+07
China, Hong Kong SAR	Canada	10065.2
China, Hong Kong SAR	China	2.91575e+07
China, Hong Kong SAR	China	6.91272e+06
China, Hong Kong SAR	China, Macao SAR	34274.6
China, Hong Kong SAR	Denmark	403.144
China, Hong Kong SAR	Fiji	590.103
China, Hong Kong SAR	France	18403.1
China, Hong Kong SAR	France	716222
China, Hong Kong SAR	Germany	8.20322e+07
China, Hong Kong SAR	Germany	397788
China, Hong Kong SAR	India	4543.82
China, Hong Kong SAR	Israel	3488.68
China, Hong Kong SAR	Italy	4.17991e+06
China, Hong Kong SAR	Italy	211434
China, Hong Kong SAR	Japan	3.1956e+08
China, Hong Kong SAR	Japan	8.69915e+06
China, Hong Kong SAR	Malaysia	270295
China, Hong Kong SAR	New Zealand	252.81
China, Hong Kong SAR	Other Asia, nes	1.33305e+06
China, Hong Kong SAR	Other Asia, nes	2.6604e+06
China, Hong Kong SAR	Rep. of Korea	1.46777e+07
China, Hong Kong SAR	Rep. of Korea	59338.2
China, Hong Kong SAR	Russian Federation	3.46754e+08
China, Hong Kong SAR	Singapore	97274.5
China, Hong Kong SAR	Singapore	1.14791e+06
China, Hong Kong SAR	South Africa	6.69015e+08
China, Hong Kong SAR	Spain	32769.5
China, Hong Kong SAR	Switzerland	9.38071e+08
China, Hong Kong SAR	Switzerland	360155
China, Hong Kong SAR	Thailand	184265
China, Hong Kong SAR	Thailand	22414.5
China, Hong Kong SAR	United Arab Emirates	486654
China, Hong Kong SAR	United Kingdom	1.96063e+09
China, Hong Kong SAR	United Kingdom	223963
China, Hong Kong SAR	USA	5.62367e+07
China, Hong Kong SAR	USA	1.20494e+06
China, Macao SAR	China	5.204
China, Macao SAR	China, Hong Kong SAR	129784
China, Macao SAR	France	151128
China, Macao SAR	Japan	103591
China, Macao SAR	Spain	19.949
Colombia	China	63466.3
Colombia	Czechia	2855.63
Colombia	India	218.71
Colombia	Italy	407725
Colombia	Spain	733.92
Colombia	United Kingdom	1414.5
Colombia	USA	249843
Colombia	USA	294.69
Congo	China	61.047
Congo	China	379.473
Congo	Dem. Rep. of the Congo	44.375
Costa Rica	Areas, nes	19231.2
Costa Rica	Areas, nes	90.91
Costa Rica	Canada	7219.46
Costa Rica	China	37975.6
Costa Rica	China	29998.8
Costa Rica	France	1.05654e+06
Costa Rica	Germany	188294
Costa Rica	India	137.41
Costa Rica	Mexico	1039.49
Costa Rica	Myanmar	36.25
Costa Rica	Panama	1724.64
Costa Rica	Spain	21323.3
Costa Rica	Sweden	180811
Costa Rica	Switzerland	168725
Costa Rica	Türkiye	55145.4
Costa Rica	USA	7.87054e+06
Costa Rica	USA	10781.3
Côte d'Ivoire	Areas, nes	252.751
Côte d'Ivoire	China	4072.31
Côte d'Ivoire	China	272.482
Côte d'Ivoire	France	13.493
Côte d'Ivoire	Ghana	676.914
Côte d'Ivoire	Kenya	124.052
Côte d'Ivoire	Lebanon	69.815
Côte d'Ivoire	Mali	597.275
Côte d'Ivoire	South Africa	1230.4
Côte d'Ivoire	Spain	62.855
Côte d'Ivoire	Thailand	673.567
Côte d'Ivoire	USA	2105.27
Croatia	Austria	25599
Croatia	China	33
Croatia	Germany	60976
Croatia	Germany	1643
Croatia	Hungary	1560
Croatia	Italy	34
Croatia	Netherlands	219
Croatia	North Macedonia	4660
Croatia	Other Asia, nes	10078
Croatia	Slovenia	8888
Croatia	Slovenia	19137
Croatia	Spain	486
Croatia	United Kingdom	732
Croatia	USA	1673
Curaçao	Areas, nes	1117.31
Curaçao	Colombia	223.461
Curaçao	Netherlands	111.731
Curaçao	USA	14580.9
Curaçao	USA	614.519
Cyprus	China	2090.51
Cyprus	Germany	30533.6
Cyprus	Italy	11184.9
Cyprus	Italy	4128.4
Cyprus	USA	1841.93
Cyprus	USA	568.816
Czechia	Austria	635195
Czechia	Bangladesh	6
Czechia	Belgium	188
Czechia	Canada	66
Czechia	China	1903
Czechia	China	145176
Czechia	Colombia	290
Czechia	France	22659
Czechia	France	277
Czechia	Germany	6824445
Czechia	Germany	16123
Czechia	Hungary	16
Czechia	India	492
Czechia	Indonesia	1924
Czechia	Ireland	451561
Czechia	Italy	7119887
Czechia	Italy	750
Czechia	Japan	25433
Czechia	Netherlands	1608
Czechia	Other Asia, nes	1147
Czechia	Other Europe, nes	349
Czechia	Poland	20965612
Czechia	Poland	1034
Czechia	Russian Federation	25058
Czechia	Slovakia	63961
Czechia	Slovakia	33248
Czechia	Slovenia	9261
Czechia	Spain	21627
Czechia	Switzerland	1061728
Czechia	Switzerland	9458
Czechia	Thailand	1017
Czechia	Türkiye	2
Czechia	United Arab Emirates	387
Czechia	United Kingdom	480548
Czechia	United Kingdom	47
Czechia	USA	508079
Czechia	USA	489
Czechia	Viet Nam	1091
Dem. Rep. of the Congo	India	3552.56
Denmark	Austria	93.861
Denmark	Belgium	826.456
Denmark	Bulgaria	1158.12
Denmark	Canada	2609.36
Denmark	China	45601.5
Denmark	China, Hong Kong SAR	25475.9
Denmark	Croatia	831.703
Denmark	Estonia	7954.18
Denmark	France	4615.08
Denmark	France	37875.4
Denmark	French Polynesia	214014
Denmark	Germany	5.30147e+06
Denmark	Germany	4746.27
Denmark	Greece	199.717
Denmark	Hungary	297.326
Denmark	India	11.545
Denmark	Ireland	793866
Denmark	Italy	112174
Denmark	Italy	1533.11
Denmark	Japan	17763.7
Denmark	Latvia	87.114
Denmark	Lithuania	9998.28
Denmark	Luxembourg	3114.35
Denmark	Netherlands	5907.39
Denmark	Netherlands	1244.18
Denmark	Norway	554.919
Denmark	Poland	561.066
Denmark	Poland	6627.99
Denmark	Romania	36.435
Denmark	Singapore	19333.8
Denmark	Slovakia	1287.21
Denmark	Slovenia	1360.83
Denmark	Spain	76.018
Denmark	Spain	15371.1
Denmark	Sweden	130514
Denmark	Sweden	229.404
Denmark	Switzerland	548089
Denmark	Switzerland	304.523
Denmark	Thailand	1219.14
Denmark	United Kingdom	591168
Denmark	United Kingdom	230960
Denmark	USA	194282
Denmark	USA	2030.3
Dominican Rep.	China	32445.1
Dominican Rep.	India	904.616
Dominican Rep.	Spain	273.11
Dominican Rep.	Thailand	76.356
Dominican Rep.	USA	3.90745e+07
Dominican Rep.	USA	79.288
Ecuador	China	10026.8
Ecuador	Germany	4.13
Ecuador	India	245.819
Ecuador	Italy	4126.45
Ecuador	Spain	184.17
Ecuador	Thailand	30.95
Ecuador	USA	647.425
Ecuador	USA	1625.55
Egypt	Austria	3814.6
Egypt	China	3989.4
Egypt	China, Hong Kong SAR	425293
Egypt	Germany	485725
Egypt	India	349712
Egypt	Italy	69282.8
Egypt	United Kingdom	146256
Egypt	USA	102.552
El Salvador	China	5758.15
El Salvador	China, Hong Kong SAR	51906.4
El Salvador	Spain	1571.65
El Salvador	USA	491.64
El Salvador	USA	700.39
Estonia	Austria	4.478
Estonia	China	118256
Estonia	Germany	351.739
Estonia	India	13.434
Estonia	Lithuania	23.509
Estonia	Russian Federation	2698.16
Estonia	United Kingdom	254.121
Estonia	USA	233.858
Estonia	Viet Nam	41.644
Eswatini	South Africa	230.19
Eswatini	South Africa	254.07
Ethiopia	China	18124.5
Ethiopia	China	64884.2
Fiji	USA	44032.6
Finland	Austria	16102.8
Finland	Belgium	295.547
Finland	Canada	3735.76
Finland	China	48778.7
Finland	China, Hong Kong SAR	584.377
Finland	Denmark	1073.6
Finland	France	44738.4
Finland	France	5245.96
Finland	Germany	673533
Finland	Germany	1370.26
Finland	India	594.452
Finland	Italy	1173.23
Finland	Lithuania	6.717
Finland	Netherlands	1218.01
Finland	Sweden	464735
Finland	Sweden	1728.5
Finland	Switzerland	300618
Finland	Thailand	794.842
Finland	United Kingdom	211636
Finland	United Kingdom	1319.89
Finland	USA	37275.9
Finland	USA	15258.7
Finland	Viet Nam	22.39
France	Areas, nes	127278
France	Areas, nes	23440.8
France	Australia	813.98
France	Australia	3735.13
France	Austria	443579
France	Austria	1408.51
France	Bangladesh	117.562
France	Belgium	265931
France	Belgium	2305.34
France	Canada	1821.66
France	China	22723.1
France	China	640005
France	China, Hong Kong SAR	53419.3
France	Colombia	196017
France	Côte d'Ivoire	68.298
France	Czechia	390087
France	Czechia	42.546
France	Denmark	1595.49
France	France	199849
France	France	21595.7
France	French Polynesia	14918.1
France	Germany	1.60385e+07
France	Germany	5496.32
France	Hungary	5359.73
France	India	14351.6
France	Indonesia	354.927
France	Ireland	175.784
France	Israel	171.305
France	Italy	5.13855e+07
France	Italy	25727.1
France	Japan	2.59139e+06
France	Japan	23856.2
France	Luxembourg	225614
France	Mexico	14524
France	Netherlands	2808.06
France	Netherlands	690.819
France	New Zealand	103.007
France	Niger	1034.55
France	Other Asia, nes	3848.21
France	Other Asia, nes	1484.65
France	Philippines	10159.6
France	Poland	94.05
France	Poland	78.375
France	Portugal	140966
France	Singapore	3293.99
France	Slovakia	2038.87
France	South Africa	147860
France	Spain	5.18668e+06
France	Spain	30.23
France	Switzerland	2.92924e+07
France	Switzerland	1898.91
France	Thailand	153941
France	Thailand	23319.9
France	Türkiye	2014.24
France	United Kingdom	6.92731e+06
France	United Kingdom	2898.75
France	USA	2.17361e+07
France	USA	81264.8
France	Viet Nam	83.973
French Polynesia	Areas, nes	7439.75
French Polynesia	France	2057.36
French Polynesia	USA	1845.01
Gabon	China	130.438
Gabon	France	199543
Gabon	United Kingdom	221.578
Georgia	China	96.27
Georgia	Czechia	54.7
Georgia	Portugal	3032.75
Georgia	Spain	4220.69
Germany	Areas, nes	1.82028e+09
Germany	Australia	84840.5
Germany	Austria	4.95963e+07
Germany	Austria	3722.74
Germany	Belgium	1.18802e+06
Germany	Belgium	88.45
Germany	Bolivia (Plurinational State of)	30965.4
Germany	Brazil	103191
Germany	Canada	4.99497e+06
Germany	Canada	8226.99
Germany	China	871997
Germany	China	4.20719e+06
Germany	China, Hong Kong SAR	1.48886e+06
Germany	China, Hong Kong SAR	563138
Germany	Colombia	38519.5
Germany	Croatia	110731
Germany	Cyprus	1.46188e+06
Germany	Czechia	2.20406e+07
Germany	Czechia	44010.1
Germany	Denmark	138619
Germany	Denmark	890.1
Germany	Estonia	105117
Germany	Finland	26904.5
Germany	France	1.07624e+08
Germany	France	138569
Germany	French Polynesia	14456.6
Germany	Ghana	10183
Germany	Greece	77917.9
Germany	Haiti	14373.7
Germany	Hungary	1.74403e+07
Germany	India	2.39907e+06
Germany	India	29022.9
Germany	Indonesia	93222
Germany	Indonesia	426.576
Germany	Ireland	1.33377e+06
Germany	Ireland	1692.87
Germany	Israel	159273
Germany	Israel	3766.41
Germany	Italy	2.41821e+08
Germany	Italy	22938.8
Germany	Japan	4.20562e+07
Germany	Japan	58904.5
Germany	Latvia	4.53739e+06
Germany	Lebanon	8344.55
Germany	Lithuania	1.24349e+07
Germany	Luxembourg	722395
Germany	Mexico	1.63352e+07
Germany	Myanmar	1006.54
Germany	Netherlands	106301
Germany	Netherlands	33917.8
Germany	Norway	1.12444e+07
Germany	Other Asia, nes	2.76836e+06
Germany	Philippines	28269.3
Germany	Poland	1.81804e+07
Germany	Poland	5604.83
Germany	Portugal	109582
Germany	Portugal	89.57
Germany	Rep. of Korea	3.38994e+06
Germany	Rep. of Korea	1566.35
Germany	Romania	771242
Germany	Russian Federation	7.81131e+08
Germany	Saudi Arabia	114077
Germany	Singapore	3.6294e+06
Germany	Slovakia	17228.8
Germany	Slovenia	1.21461e+06
Germany	South Africa	7.28142e+08
Germany	Spain	1.94663e+07
Germany	Spain	6960.69
Germany	Sweden	95126.5
Germany	Sweden	15.675
Germany	Switzerland	1.30691e+08
Germany	Switzerland	11321.6
Germany	Thailand	808884
Germany	Thailand	47191
Germany	Türkiye	140687
Germany	Türkiye	6529.64
Germany	Ukraine	2.74128e+06
Germany	United Arab Emirates	5.73028e+06
Germany	United Kingdom	7.23245e+08
Germany	United Kingdom	7363.76
Germany	USA	4.10265e+08
Germany	USA	65049
Ghana	South Africa	13073.5
Ghana	South Africa	4.736
Ghana	USA	100.704
Greece	Austria	67155.1
Greece	Belgium	475859
Greece	Belgium	36872.1
Greece	China	49926.3
Greece	China, Hong Kong SAR	30402.7
Greece	Cyprus	34033.2
Greece	France	493502
Greece	France	5033.16
Greece	Germany	45691.4
Greece	Germany	2640.84
Greece	Italy	40837.3
Greece	Netherlands	564.215
Greece	Poland	16.792
Greece	Portugal	14515.1
Greece	Spain	168849
Greece	Switzerland	38919.7
Greece	United Kingdom	18802.7
Greece	United Kingdom	1575.1
Greece	USA	1970.28
Grenada	USA	128.889
Guatemala	Costa Rica	1339
Guatemala	El Salvador	1191
Guatemala	Honduras	19131
Guatemala	India	1831
Guatemala	Panama	337
Guatemala	Portugal	4187
Guatemala	Spain	9783
Guatemala	USA	904
Guatemala	USA	15235
Honduras	China	12626.6
Honduras	India	22.65
Honduras	Spain	366.9
Honduras	Thailand	68.71
Honduras	USA	265
Hungary	Austria	610
Hungary	Belgium	87
Hungary	Canada	180
Hungary	China	2343
Hungary	China, Hong Kong SAR	6946
Hungary	Czechia	5665
Hungary	Germany	177808
Hungary	Germany	4388
Hungary	Italy	157242
Hungary	Norway	12
Hungary	Poland	5643
Hungary	Portugal	3782
Hungary	Romania	147
Hungary	Slovakia	22173
Hungary	Spain	14426
Hungary	Switzerland	88534
Hungary	Thailand	85
Hungary	Türkiye	65
Hungary	United Kingdom	4973
Hungary	USA	29411
Hungary	USA	805
Hungary	Viet Nam	1355
Iceland	China	1133.51
Iceland	Denmark	1621.88
Iceland	Germany	68209.5
Iceland	Italy	7434.41
Iceland	Italy	239.617
Iceland	United Kingdom	1167.61
Iceland	United Kingdom	1478.33
Iceland	USA	16413.3
Iceland	USA	269.921
India	Austria	65635.1
India	Belgium	1237.95
India	China	335863
India	China	2931.8
India	China, Hong Kong SAR	1.5171e+06
India	China, Hong Kong SAR	2292.83
India	Czechia	526245
India	Egypt	1.47128e+06
India	France	26001.9
India	France	71896.6
India	Germany	3.02663e+07
India	Germany	260.565
India	Italy	1.07619e+07
India	Japan	4.56086e+06
India	Other Asia, nes	4483.9
India	Portugal	5923.22
India	Rep. of Korea	5718.15
India	Singapore	1.53792e+06
India	South Africa	6.48714e+07
India	Spain	65189.8
India	Spain	31782.9
India	Switzerland	9224.01
India	United Arab Emirates	701335
India	United Kingdom	1.4881e+08
India	United Kingdom	137064
India	USA	1.51071e+07
India	USA	472.339
Indonesia	Australia	5595
Indonesia	Austria	2926
Indonesia	China	3022
Indonesia	China	1659
Indonesia	China, Hong Kong SAR	92
Indonesia	Germany	15825
Indonesia	Italy	71160
Indonesia	Japan	59548
Indonesia	Japan	41
Indonesia	Kuwait	162
Indonesia	Malaysia	578
Indonesia	Netherlands	1115
Indonesia	Other Asia, nes	2105
Indonesia	Other Asia, nes	229
Indonesia	Rep. of Korea	327482
Indonesia	Russian Federation	281956
Indonesia	Saudi Arabia	79200
Indonesia	Singapore	116809
Indonesia	South Africa	124731
Indonesia	Thailand	166222
Indonesia	Türkiye	77
Indonesia	USA	8027
Indonesia	USA	121
Iran	Germany	1201689
Iran	Other Asia, nes	710024
Ireland	Areas, nes	1.02924e+06
Ireland	Bulgaria	626.906
Ireland	Canada	926.925
Ireland	China	50.376
Ireland	China	32079.7
Ireland	Germany	1.12041e+08
Ireland	Iceland	28366.4
Ireland	Israel	1598.61
Ireland	Italy	44326.7
Ireland	Italy	554.14
Ireland	Japan	340.32
Ireland	Netherlands	1.30419e+07
Ireland	New Zealand	54.854
Ireland	Poland	39948.5
Ireland	South Africa	1.14632e+06
Ireland	Spain	49055.4
Ireland	Switzerland	54967.3
Ireland	Thailand	438.834
Ireland	United Kingdom	1.22962e+06
Ireland	United Kingdom	107381
Ireland	USA	2.02295e+07
Ireland	USA	4929.05
Israel	Belgium	36000
Israel	China	101000
Israel	China, Hong Kong SAR	58000
Israel	Czechia	44000
Israel	France	1000
Israel	France	1000
Israel	French Polynesia	3000
Israel	Germany	320000
Israel	India	19000
Israel	Italy	61000
Israel	Italy	1000
Israel	Japan	1000
Israel	Rep. of Korea	532000
Israel	Spain	1000
Israel	Switzerland	46000
Israel	United Kingdom	1715000
Israel	USA	7261000
Italy	Australia	13293
Italy	Austria	3.3279e+06
Italy	Belgium	1.00624e+07
Italy	Brazil	507379
Italy	Bulgaria	11930.5
Italy	China	2.06256e+07
Italy	China	642501
Italy	China, Hong Kong SAR	23867.6
Italy	China, Hong Kong SAR	57830.7
Italy	Colombia	298302
Italy	Croatia	8945.61
Italy	Czechia	1.68567e+06
Italy	Denmark	15381.1
Italy	Egypt	227171
Italy	Finland	38631.8
Italy	France	2.86028e+07
Italy	France	233967
Italy	French Polynesia	636326
Italy	Germany	2.29589e+08
Italy	Germany	17588.9
Italy	Greece	3671.17
Italy	Hungary	271463
Italy	India	1.95689e+06
Italy	Israel	260345
Italy	Japan	148162
Italy	Japan	227181
Italy	Jordan	121311
Italy	Luxembourg	11817.4
Italy	Malaysia	179376
Italy	Netherlands	32299.3
Italy	Netherlands	5733.47
Italy	Norway	8.24138e+06
Italy	Other Asia, nes	8.17192e+06
Italy	Other Asia, nes	1247.23
Italy	Poland	2.23725e+06
Italy	Poland	1527.13
Italy	Portugal	15562.4
Italy	Rep. of Korea	4.11523e+06
Italy	Romania	273515
Italy	Russian Federation	6.79153e+08
Italy	Singapore	6.07869e+06
Italy	Slovakia	159552
Italy	South Africa	9.19237e+07
Italy	Spain	9.24785e+06
Italy	Spain	442294
Italy	Sweden	2.55554e+06
Italy	Switzerland	2.33782e+08
Italy	Switzerland	3365.52
Italy	Türkiye	28080.7
Italy	United Arab Emirates	17497.1
Italy	United Kingdom	2.28487e+07
Italy	United Kingdom	4745.99
Italy	USA	3.4967e+08
Italy	USA	88735
Italy	Viet Nam	119415
Jamaica	China	83.586
Jamaica	USA	444.571
Jamaica	USA	3718.7
Japan	Australia	178656
Japan	Australia	3.3751e+06
Japan	Belgium	4.27081e+07
Japan	Bulgaria	66842.3
Japan	Canada	7155.77
Japan	Canada	5871.4
Japan	China	243718
Japan	China	1.06837e+06
Japan	China, Hong Kong SAR	14293.2
Japan	China, Hong Kong SAR	25907.6
Japan	Czechia	8467.67
Japan	France	27045.2
Japan	France	519390
Japan	French Polynesia	561343
Japan	Germany	1.69932e+08
Japan	Germany	17467.4
Japan	India	9898.82
Japan	India	33595.4
Japan	Indonesia	271993
Japan	Ireland	290442
Japan	Italy	2.7069e+06
Japan	Italy	39540.2
Japan	Malaysia	36393.5
Japan	Norway	2.36815e+07
Japan	Other Asia, nes	9.978e+07
Japan	Philippines	1.07245e+07
Japan	Philippines	3889.81
Japan	Rep. of Korea	1.2243e+07
Japan	Rep. of Korea	2137.56
Japan	Russian Federation	1.14837e+09
Japan	Singapore	3.82702e+06
Japan	South Africa	2.77333e+09
Japan	Spain	16687.6
Japan	Switzerland	2.72253e+07
Japan	Switzerland	3596.24
Japan	Thailand	933627
Japan	Thailand	95667.2
Japan	Türkiye	1871.51
Japan	United Kingdom	1.31432e+08
Japan	United Kingdom	9403.42
Japan	USA	1.42485e+08
Japan	USA	146033
Japan	Viet Nam	208343
Japan	Viet Nam	21256.3
Jordan	Italy	173744
Jordan	United Kingdom	1056.34
Kazakhstan	China	5031.75
Kazakhstan	Germany	500
Kazakhstan	India	85.21
Kazakhstan	Russian Federation	36125.3
Kazakhstan	Russian Federation	5644.1
Kazakhstan	Spain	310.33
Kazakhstan	USA	1326.03
Kazakhstan	USA	5982.77
Kenya	China	2263.81
Kenya	South Africa	1053.96
Kenya	United Kingdom	18965.2
Kuwait	China	7112
Kuwait	Germany	15301
Kuwait	Germany	7482
Kuwait	USA	135439
Kyrgyzstan	China	39
Kyrgyzstan	Italy	3319
Kyrgyzstan	Russian Federation	5233
Lao People's Dem. Rep.	Thailand	2419.51
Lao People's Dem. Rep.	USA	376816
Latvia	Austria	1105.63
Latvia	China	8190.36
Latvia	China, Hong Kong SAR	11030.5
Latvia	Estonia	14135.9
Latvia	Finland	78.334
Latvia	Germany	287769
Latvia	India	301.026
Latvia	Italy	743.053
Latvia	Lithuania	694.933
Latvia	Poland	17.905
Latvia	Russian Federation	269787
Latvia	Spain	25530.1
Latvia	Sweden	10258.4
Latvia	United Kingdom	335.717
Latvia	United Kingdom	1999.75
Lebanon	Austria	10658.8
Lebanon	China	361.87
Lebanon	France	28.71
Lebanon	Germany	407.54
Lebanon	Switzerland	306839
Lebanon	USA	303.66
Lebanon	USA	3020.76
Lesotho	China	215.406
Lesotho	South Africa	2772.04
Lesotho	South Africa	196.359
Liberia	China	4680.5
Lithuania	China	14148
Lithuania	Estonia	36
Lithuania	Germany	1613
Lithuania	Germany	469
Lithuania	Italy	550522
Lithuania	Italy	1649
Lithuania	Latvia	192
Lithuania	Poland	11758
Lithuania	Portugal	29
Lithuania	Spain	6360
Lithuania	Switzerland	209439
Lithuania	United Kingdom	1891
Lithuania	USA	997
Luxembourg	Belgium	9830.03
Luxembourg	Belgium	21082.2
Luxembourg	China	4750.01
Luxembourg	China, Hong Kong SAR	251.012
Luxembourg	Denmark	4228.31
Luxembourg	France	38082.4
Luxembourg	France	21063.1
Luxembourg	French Polynesia	3544.37
Luxembourg	Germany	39284.7
Luxembourg	Germany	2983.65
Luxembourg	Italy	279.872
Luxembourg	Japan	7119.91
Luxembourg	Other Europe, nes	169977
Luxembourg	Other Europe, nes	13478.2
Luxembourg	Spain	19206.2
Luxembourg	Switzerland	1.25917e+06
Luxembourg	Thailand	560.819
Luxembourg	United Kingdom	42.541
Luxembourg	USA	1270.43
Luxembourg	USA	160.826
Madagascar	France	195.211
Malaysia	Australia	2292.84
Malaysia	China	1.50835e+08
Malaysia	China	11018.1
Malaysia	China, Hong Kong SAR	813229
Malaysia	China, Hong Kong SAR	176880
Malaysia	Germany	7.51665e+06
Malaysia	Italy	5171.07
Malaysia	Japan	1.27001e+07
Malaysia	Japan	32591.4
Malaysia	Other Asia, nes	1.19437e+07
Malaysia	Singapore	99619.8
Malaysia	Switzerland	7.05585e+06
Malaysia	United Kingdom	22342.7
Malaysia	USA	1.81579e+06
Maldives	Malaysia	24.97
Maldives	Thailand	1198.68
Mali	China	9745.6
Malta	Austria	105096
Malta	China	148.986
Malta	China, Hong Kong SAR	21635.5
Malta	Germany	585.864
Malta	Germany	208.357
Malta	Italy	942.087
Malta	Netherlands	7013.56
Malta	Portugal	2119.42
Malta	Spain	8069.91
Malta	Thailand	1583.96
Malta	United Kingdom	77.294
Malta	USA	297.973
Mauritania	India	121
Mauritius	China	1648.76
Mauritius	France	37519.7
Mauritius	Germany	35936.1
Mauritius	Italy	27219.8
Mauritius	Romania	7453.11
Mauritius	Singapore	304.996
Mauritius	South Africa	9359.58
Mauritius	USA	5846.41
Mexico	Canada	751478
Mexico	China	546901
Mexico	China, Hong Kong SAR	8853
Mexico	Germany	718482
Mexico	India	3746
Mexico	Japan	5368
Mexico	Spain	35907
Mexico	United Kingdom	1415372
Mexico	USA	12998676
Mexico	USA	366909
Mongolia	China	229.78
Mongolia	Germany	3195.76
Mongolia	India	57.7
Mongolia	Viet Nam	147.06
Montenegro	Bangladesh	7.73
Montenegro	China	1319.33
Montenegro	Hungary	19.745
Montenegro	Rep. of Korea	7.685
Montenegro	Viet Nam	45.732
Morocco	Belgium	1275.65
Morocco	China	90865.9
Morocco	France	44011.8
Morocco	Germany	627.945
Morocco	India	31.61
Morocco	Italy	164341
Morocco	Malaysia	2374.84
Morocco	Switzerland	9280.47
Morocco	United Kingdom	845.163
Morocco	United Kingdom	270.976
Morocco	USA	193.822
Mozambique	China	30.893
Myanmar	China	8579.98
Myanmar	Japan	17863.7
Myanmar	Rep. of Korea	32600
Namibia	China	625.283
Namibia	China, Hong Kong SAR	176.179
Namibia	India	4.657
Namibia	South Africa	1728.16
Namibia	South Africa	2647.9
Namibia	Switzerland	1573.64
Namibia	Switzerland	29.512
Namibia	USA	11.766
Nepal	China	476.1
Nepal	India	220.7
Nepal	India	3257.23
Nepal	Türkiye	244.94
Netherlands	Austria	119262
Netherlands	Austria	186.959
Netherlands	Belgium	155607
Netherlands	Belgium	23118
Netherlands	Bulgaria	530.65
Netherlands	Bulgaria	10.076
Netherlands	China	4050.41
Netherlands	China	52590.4
Netherlands	China, Hong Kong SAR	1322.15
Netherlands	China, Hong Kong SAR	39055.4
Netherlands	Croatia	260.847
Netherlands	Croatia	99.637
Netherlands	Cyprus	1.12
Netherlands	Cyprus	2.239
Netherlands	Czechia	308.986
Netherlands	Czechia	14.554
Netherlands	Denmark	2348.74
Netherlands	Denmark	47634.3
Netherlands	Estonia	41.422
Netherlands	Estonia	52.617
Netherlands	Finland	2259.18
Netherlands	Finland	82.844
Netherlands	France	354131
Netherlands	France	33567.5
Netherlands	Germany	1.38933e+07
Netherlands	Germany	21270.8
Netherlands	Greece	304.508
Netherlands	Greece	38.064
Netherlands	Hungary	9099.42
Netherlands	Hungary	19.032
Netherlands	India	1811.38
Netherlands	Ireland	410.862
Netherlands	Ireland	15.673
Netherlands	Israel	2093.49
Netherlands	Italy	25833.9
Netherlands	Italy	272.042
Netherlands	Japan	1019.88
Netherlands	Latvia	614.614
Netherlands	Latvia	49.259
Netherlands	Lithuania	656.036
Netherlands	Lithuania	3.359
Netherlands	Luxembourg	2767.44
Netherlands	Luxembourg	3.359
Netherlands	Malta	7.837
Netherlands	Norway	703.056
Netherlands	Other Asia, nes	255.249
Netherlands	Poland	3472.74
Netherlands	Poland	58.215
Netherlands	Portugal	1635.61
Netherlands	Portugal	41.422
Netherlands	Romania	1393.8
Netherlands	Romania	61.573
Netherlands	Slovakia	883.298
Netherlands	Slovakia	13.434
Netherlands	Slovenia	1359.09
Netherlands	Spain	54271.9
Netherlands	Spain	140658
Netherlands	Sweden	22579.5
Netherlands	Sweden	11.195
Netherlands	Switzerland	797632
Netherlands	Switzerland	410.862
Netherlands	Thailand	120.908
Netherlands	Türkiye	50.378
Netherlands	Ukraine	3361.9
Netherlands	United Arab Emirates	2317.4
Netherlands	United Kingdom	1.44593e+06
Netherlands	United Kingdom	232.859
Netherlands	USA	879628
Netherlands	USA	13763.3
New Zealand	Australia	51934.1
New Zealand	Australia	9488.46
New Zealand	Austria	4597.79
New Zealand	Canada	16.454
New Zealand	China	380119
New Zealand	China, Hong Kong SAR	9250.87
New Zealand	Czechia	1196.51
New Zealand	France	1783.57
New Zealand	France	4490.52
New Zealand	Germany	346458
New Zealand	India	125.047
New Zealand	Indonesia	2739.19
New Zealand	Italy	139025
New Zealand	Japan	1.86387e+06
New Zealand	Japan	47139.5
New Zealand	New Zealand	2594.4
New Zealand	New Zealand	3907.4
New Zealand	Saudi Arabia	8634.85
New Zealand	Switzerland	138709
New Zealand	Thailand	994.455
New Zealand	United Kingdom	2304.82
New Zealand	United Kingdom	126.364
New Zealand	USA	732873
New Zealand	USA	8599.97
Nicaragua	China	2736.46
Nicaragua	USA	160.23
Niger	France	2477
Niger	Senegal	15162.6
Nigeria	China	8546.05
Nigeria	China	61
Nigeria	Singapore	1165.94
Nigeria	United Kingdom	3428.7
Nigeria	USA	431
Nigeria	USA	306.61
North Macedonia	Belgium	5.57273e+07
North Macedonia	Cambodia	2.66
North Macedonia	China	5538.22
North Macedonia	Germany	281.82
North Macedonia	Italy	8.24878e+07
North Macedonia	South Africa	2.21199e+08
North Macedonia	Thailand	38.5
North Macedonia	United Kingdom	8.6938e+08
North Macedonia	USA	9.50578e+07
North Macedonia	Viet Nam	239.21
Norway	Australia	5736.2
Norway	Belgium	5603.22
Norway	Belgium	240.396
Norway	Canada	247.67
Norway	China	7025.7
Norway	China	196011
Norway	China, Hong Kong SAR	11883.2
Norway	Denmark	28227.4
Norway	Denmark	5520.13
Norway	Fiji	3280.3
Norway	Finland	1598.32
Norway	France	144.238
Norway	France	70821.7
Norway	French Polynesia	17333.1
Norway	Germany	6.76964e+06
Norway	Germany	46147.5
Norway	India	4712.22
Norway	India	369.63
Norway	Indonesia	6988.99
Norway	Italy	37780.6
Norway	Italy	159.355
Norway	Japan	4957.27
Norway	Netherlands	1118.33
Norway	Poland	616.164
Norway	South Africa	577394
Norway	Spain	1303.82
Norway	Sweden	29228.6
Norway	Sweden	1169.13
Norway	Switzerland	8583.79
Norway	Switzerland	1288.82
Norway	Thailand	352.354
Norway	Thailand	1309.39
Norway	United Kingdom	4.63395e+06
Norway	United Kingdom	1837.69
Norway	USA	4.05991e+06
Norway	USA	1892.59
Norway	Viet Nam	130.939
Oman	India	3446.03
Oman	United Arab Emirates	471006
Oman	Yemen	1201.56
Other Asia, nes	Australia	2847.92
Other Asia, nes	Austria	2362.48
Other Asia, nes	Belgium	226.53
Other Asia, nes	Belgium	4142.44
Other Asia, nes	Brazil	5145.68
Other Asia, nes	Canada	2427.21
Other Asia, nes	China	932470
Other Asia, nes	China	38349.9
Other Asia, nes	China, Hong Kong SAR	2.55786e+06
Other Asia, nes	China, Hong Kong SAR	5663.48
Other Asia, nes	France	234436
Other Asia, nes	French Polynesia	19611.9
Other Asia, nes	Germany	6.47904e+06
Other Asia, nes	Germany	5728.19
Other Asia, nes	India	355.99
Other Asia, nes	Italy	64.72
Other Asia, nes	Japan	6.97347e+07
Other Asia, nes	Japan	277673
Other Asia, nes	Malaysia	16958.1
Other Asia, nes	Malaysia	1779.95
Other Asia, nes	Philippines	1715.22
Other Asia, nes	Portugal	11456.4
Other Asia, nes	Rep. of Korea	1.77869e+06
Other Asia, nes	Rep. of Korea	32.36
Other Asia, nes	Russian Federation	186442
Other Asia, nes	Singapore	5566.4
Other Asia, nes	South Africa	5.05768e+07
Other Asia, nes	Switzerland	392464
Other Asia, nes	Thailand	323.62
Other Asia, nes	United Kingdom	7.66264e+06
Other Asia, nes	United Kingdom	161.81
Other Asia, nes	USA	4.37018e+07
Other Asia, nes	USA	2491.93
Pakistan	China	1821.53
Pakistan	Germany	1799.07
Pakistan	Switzerland	2193.14
Pakistan	United Kingdom	5697.27
Pakistan	USA	551.869
Panama	China	1708
Panama	USA	1499
Papua New Guinea	Australia	77.732
Papua New Guinea	Australia	61969.7
Papua New Guinea	Fiji	12342.5
Papua New Guinea	Spain	21.451
Paraguay	China	1112
Paraguay	Germany	7
Paraguay	India	109
Paraguay	Spain	81
Paraguay	USA	2056
Peru	China	20869.4
Peru	Germany	98.48
Peru	India	594.97
Peru	Italy	2281.79
Peru	Other Asia, nes	952.73
Peru	Philippines	4359.85
Peru	Spain	2963.42
Peru	USA	21002.5
Peru	USA	393.02
Philippines	China	106215
Philippines	China	1671
Philippines	China, Hong Kong SAR	5731
Philippines	Finland	2872
Philippines	Japan	130662
Philippines	Japan	721
Philippines	Other Asia, nes	2669
Philippines	Rep. of Korea	62
Philippines	Singapore	5363
Philippines	Switzerland	94
Philippines	USA	43025
Philippines	USA	17607
Poland	Austria	81866
Poland	Canada	2529
Poland	Canada	7607
Poland	China	2318
Poland	China	403793
Poland	China, Hong Kong SAR	61014
Poland	Czechia	261007
Poland	France	39327
Poland	Germany	13456085
Poland	Germany	1646
Poland	Hungary	474
Poland	India	764
Poland	Ireland	4795163
Poland	Israel	1150
Poland	Italy	254422234
Poland	Italy	677
Poland	Netherlands	499
Poland	Other Europe, nes	335
Poland	Portugal	1959
Poland	Russian Federation	1776655
Poland	Saudi Arabia	30
Poland	Slovakia	17
Poland	South Africa	4247903
Poland	Spain	2379967
Poland	Spain	61063
Poland	Sweden	12763
Poland	Switzerland	38254
Poland	Thailand	611
Poland	United Kingdom	615660
Poland	United Kingdom	4091
Poland	USA	1018154
Poland	USA	10103
Poland	Viet Nam	6136
Portugal	Austria	21787.6
Portugal	Belgium	1895.5
Portugal	Belgium	21.273
Portugal	China	2231.38
Portugal	China	52545.5
Portugal	China, Hong Kong SAR	788.204
Portugal	Czechia	5933.93
Portugal	France	91445.1
Portugal	France	5770.46
Portugal	Germany	2.51049e+06
Portugal	Germany	3582.75
Portugal	Greece	5.598
Portugal	Hungary	2.239
Portugal	Ireland	24.631
Portugal	Italy	1.54126e+07
Portugal	Italy	77.253
Portugal	Netherlands	2251.53
Portugal	Netherlands	58.22
Portugal	Romania	4.478
Portugal	Spain	48373.8
Portugal	Spain	75933
Portugal	United Kingdom	459523
Portugal	USA	4192.93
Portugal	USA	275.424
Qatar	China	2.3564e+06
Qatar	China, Hong Kong SAR	383082
Qatar	France	103203
Qatar	Germany	997675
Qatar	Germany	98375.4
Qatar	India	58378.5
Qatar	Italy	26424.8
Qatar	Italy	301092
Qatar	Japan	94418
Qatar	Kuwait	16421.5
Qatar	Morocco	18425.7
Qatar	Rep. of Korea	96369.7
Qatar	Spain	17424.1
Qatar	Switzerland	2.67133e+06
[truncated: 644 more rows]

## Sheet: 2020
source	target	weight
[truncated: 2,112 more rows]

[truncated: 3 more sheets: 2021, 2022, 2023]
